# Supplementary material for: Enhancing Epitranscriptome Module Detection from m6A-Seq Data Using Threshold-Based Measurement Weighting Strategy
Source: Biomed Res Int. 2018 Jun 14;2018:2075173. doi: 10.1155/2018/2075173 (PMC6022261; doi:10.1155/2018/2075173)
Supplement: Supplementary 2 — The complete gene set enrichment analysis result of the 5 epitranscriptome modules identified from real dataset is available in Supplementary Materials Table S4. [file 2075173.f2.xlsx]

## Sheet: Site_Info
chr	chromStart	chromEnd	name	score	strand	thickStart	thickEnd	itemRgb	blockCount	blockSizes	blockStarts	lg.p	lg.fdr	fold_enrchment	module_ID
chrX	57618596	57618747	158586	0.0018	+	57618596	57618747	0	1	151,	0	-2.75	-1.79	10.3	1
chr18	21735667	21735967	26256	5e-15	+	21735667	21735967	0	1	300,	0	-14.3	-13.3	5.51	1
chrX	77243765	77244185	538	1.6e-92	+	77243765	77244185	0	1	420,	0	-91.8	-90.1	16.9	1
chr4	68483932	68488559	55236	1e-167	-	68483932	68488559	0	2	918,11,	0,4616	-167	-165	11	1
chr2	61244847	61245330	5194	0.00044	+	61244847	61245330	0	2	139,12,	0,471	-3.36	-2.2	1.93	1
chr4	13369705	13370274	9364	2e-57	-	13369705	13370274	0	1	569,	0	-56.7	-55.3	5.16	1
chr19	57862674	57863064	57343	8.3e-07	+	57862674	57863064	0	1	390,	0	-6.08	-5.24	7.14	1
chr21	46712892	46713732	642852	0	+	46712892	46713732	0	1	840,	0	-1600	#NAME?	342	1
chr1	87208814	87209024	51100	3.2e-18	+	87208814	87209024	0	1	210,	0	-17.5	-16.5	2.77	1
chr22	45127509	45128149	55615	1e-11	+	45127509	45128149	0	2	192,19,	0,621	-11	-9.96	32.5	1
chr7	43992223	43992464	84820	1.3e-16	-	43992223	43992464	0	1	241,	0	-15.9	-14.8	7.44	1
chr14	23346973	23347213	26020	5e-13	+	23346973	23347213	0	1	240,	0	-12.3	-11.1	5.58	1
chr8	38706742	38706893	6867	0.00071	+	38706742	38706893	0	1	151,	0	-3.15	-2.44	3.03	1
chr12	121855362	121855720	80196	6.3e-11	+	121855362	121855720	0	1	358,	0	-10.2	-8.89	2.58	1
chr21	34729797	34730485	3454	1.6e-16	+	34729797	34730485	0	1	688,	0	-15.8	-14.4	14.2	1
chr1	36786272	36786675	79729	2.6e-05	+	36786272	36786675	0	3	127,64,19,	0,243,384	-4.58	-3.81	16.7	1
chr2	260151	260629	26751	2.5e-11	-	260151	260629	0	1	478,	0	-10.6	-9.66	5.69	1
chr1	157015071	157015162	9826	0.0021	-	157015071	157015162	0	1	91,	0	-2.67	-1.98	2.38	1
chr12	56862300	56862449	283377	2e-08	+	56862300	56862449	0	1	149,	0	-7.7	-6.63	21.5	1
chr7	32956516	32956815	441212	4.3e-05	-	32956516	32956815	0	1	299,	0	-4.37	-3.42	6.46	1
chr3	135870039	135913255	55167	7.9e-90	-	135870039	135913255	0	2	1541,19,	0,43197	-89.1	-87.4	14	1
chr7	36396408	36406329	23366	2.5e-72	-	36396408	36406329	0	2	791,17,	0,9904	-71.6	-70.1	10.7	1
chr5	76028175	76028866	2149	2.5e-15	+	76028175	76028866	0	1	691,	0	-14.6	-12.9	3.36	1
chr12	133587304	133588349	7574	3.2e-54	+	133587304	133588349	0	1	1045,	0	-53.5	-52.1	11.7	1
chr19	58991672	58991852	55663	2e-13	+	58991672	58991852	0	1	180,	0	-12.7	-11.5	4.95	1
chr19	39980367	39981052	92609	1e-111	+	39980367	39981052	0	1	685,	0	-111	-109	6	1
chr16	48595560	48596280	9683	1.6e-68	-	48595560	48596280	0	1	720,	0	-67.8	-66.4	8.84	1
chr8	21861519	21862544	23039	0.0012	+	21861519	21862544	0	2	22,39,	0,986	-2.91	-1.85	1.52	1
chr3	128888603	128888873	7555	1.4e-06	-	128888603	128888873	0	1	270,	0	-5.85	-4.52	3.39	1
chr19	9763382	9785776	54811	1e-135	-	9763382	9785776	0	6	1175,107,127,89,155,86,	0,3840,5302,6672,8013,22308	-135	-133	57.9	1
chr13	41767564	41767924	84078	7.9e-19	-	41767564	41767924	0	1	360,	0	-18.1	-17.1	19.9	1
chr1	6282952	6283520	23463	2e-17	-	6282952	6283520	0	1	568,	0	-16.7	-14.9	11.6	1
chr17	44103427	44103697	4137	6.3e-12	+	44103427	44103697	0	1	270,	0	-11.2	-10.3	10.4	1
chr10	135116368	135122391	10844	4.5e-05	-	135116368	135122391	0	2	116,65,	0,5958	-4.35	-3.39	2.18	1
chr12	69967806	69968946	10818	1e-185	+	69967806	69968946	0	1	1140,	0	-185	-183	22.9	1
chr16	22357404	22360730	1039	1e-268	-	22357404	22360730	0	2	1740,131,	0,3195	-268	-266	40.4	1
chrX	63411462	63412391	139285	1.3e-37	-	63411462	63412391	0	1	929,	0	-36.9	-35.6	15.8	1
chr1	101705491	101705940	1901	1e-12	+	101705491	101705940	0	1	449,	0	-12	-11	37.4	1
chr3	38182626	38183465	4615	7.9e-14	+	38182626	38183465	0	1	839,	0	-13.1	-11.7	3.57	1
chr6	132270057	132270621	1490	1e-173	-	132270057	132270621	0	1	564,	0	-173	-169	2.19	1
chr20	62367142	62367591	54923	1e-67	+	62367142	62367591	0	1	449,	0	-67	-65.5	9.08	1
chr4	76453975	76454306	152815	6.3e-12	+	76453975	76454306	0	1	331,	0	-11.2	-9.48	6.34	1
chr4	3948956	3949436	348926	2.8e-08	-	3948956	3949436	0	1	480,	0	-7.56	-6.58	20.7	1
chr4	77230312	77230880	100631383	1e-07	+	77230312	77230880	0	1	568,	0	-6.98	-5.54	2.9	1
chr21	33686472	33686653	9875	0.00011	-	33686472	33686653	0	1	181,	0	-3.96	-2.82	5.64	1
chr17	66121745	66122045	100499466	2.5e-62	+	66121745	66122045	0	1	300,	0	-61.6	-60.1	8.9	1
chr19	7082932	7084396	79230	1e-151	+	7082932	7084396	0	1	1464,	0	-151	-149	19.4	1
chr19	6374905	6375231	84266	6.3e-17	+	6374905	6375231	0	1	326,	0	-16.2	-15.2	11.6	1
chr1	35656333	35657007	6421	1e-163	-	35656333	35657007	0	2	263,66,	0,608	-163	-161	3.78	1
chr20	4763187	4763998	9770	2e-28	-	4763187	4763998	0	1	811,	0	-27.7	-26.5	97.5	1
chr19	2933365	2933816	58492	2.5e-17	-	2933365	2933816	0	1	451,	0	-16.6	-15.6	6.36	1
chr3	48698097	48698638	1951	1e-142	-	48698097	48698638	0	1	541,	0	-142	-140	67	1
chr11	209705	210634	60626	3.2e-92	+	209705	210634	0	2	295,64,	0,865	-91.5	-90	9.53	1
chr1	249105278	249105787	80851	5e-11	-	249105278	249105787	0	1	509,	0	-10.3	-9.14	6.25	1
chr13	21714682	21715096	10284	1e-06	+	21714682	21715096	0	2	138,72,	0,342	-5.99	-4.56	1.32	1
chr11	113669789	113669969	57646	8.9e-10	-	113669789	113669969	0	1	180,	0	-9.05	-8.18	2.37	1
chr7	117431271	117431752	83992	4e-13	-	117431271	117431752	0	1	481,	0	-12.4	-11.4	9.52	1
chr22	38879442	38879922	10521	1e-127	-	38879442	38879922	0	1	480,	0	-127	-125	2.35	1
chr19	34710315	34710627	26065	1.3e-16	+	34710315	34710627	0	2	163,17,	0,295	-15.9	-14.9	2.14	1
chr16	69117465	69118275	79613	2e-32	+	69117465	69118275	0	1	810,	0	-31.7	-30.5	15	1
chr19	52091053	52092157	7728	6.3e-57	+	52091053	52092157	0	1	1104,	0	-56.2	-54.8	17.2	1
chr12	28116177	28116598	5744	6.3e-16	-	28116177	28116598	0	1	421,	0	-15.2	-13.8	3.43	1
chr7	2290540	2290750	4521	2e-13	+	2290540	2290750	0	1	210,	0	-12.7	-11.4	2.64	1
chr6	28871944	28872423	5987	6.3e-28	-	28871944	28872423	0	1	479,	0	-27.2	-25.7	77.6	1
chr8	42329676	42358622	6575	2e-31	-	42329676	42358622	0	2	496,74,	0,28872	-30.7	-29.4	16.8	1
chr8	146075830	146076725	28991	1.3e-84	-	146075830	146076725	0	1	895,	0	-83.9	-81.8	28.6	1
chr9	34372055	34372715	57462	4e-12	-	34372055	34372715	0	1	660,	0	-11.4	-10.4	11.4	1
chr6	42236540	42236661	55809	6.5e-05	-	42236540	42236661	0	1	121,	0	-4.19	-3.31	3.21	1
chr11	3733561	3733862	4928	1.3e-57	-	3733561	3733862	0	1	301,	0	-56.9	-55.5	8.31	1
chr7	56130407	56130725	908	0.00028	+	56130407	56130725	0	2	41,20,	0,298	-3.55	-2.61	3.47	1
chr1	229770850	229773210	9816	1e-212	+	229770850	229773210	0	1	2360,	0	-212	-210	16	1
chr10	88197050	88197321	23063	2.5e-20	-	88197050	88197321	0	1	271,	0	-19.6	-18.5	2.39	1
chr8	38677237	38682833	6867	2.5e-50	+	38677237	38682833	0	3	916,36,8,	0,4270,5588	-49.6	-48.2	15.8	1
chr19	58384690	58385410	730051	2.5e-22	-	58384690	58385410	0	1	720,	0	-21.6	-20.5	9.41	1
chr19	10224327	10224508	5032	1.2e-08	+	10224327	10224508	0	1	181,	0	-7.91	-7	5.87	1
chr22	22050615	22052022	23759	1.6e-29	+	22050615	22052022	0	1	1407,	0	-28.8	-26.6	4.33	1
chr3	48711786	48711997	51517	2e-07	-	48711786	48711997	0	1	211,	0	-6.7	-5.72	2.28	1
chr8	103661956	103663428	7071	1.6e-54	-	103661956	103663428	0	2	663,52,	0,1420	-53.8	-52.4	8.27	1
chr9	17394542	17394992	54875	1e-22	+	17394542	17394992	0	1	450,	0	-22	-21	12.2	1
chr15	56387831	56388759	64864	4e-35	-	56387831	56388759	0	1	928,	0	-34.4	-33.2	7.77	1
chr17	915161	915282	29	0.00026	-	915161	915282	0	1	121,	0	-3.58	-2.55	2.16	1
chr1	56962086	56962266	8613	2e-06	-	56962086	56962266	0	1	180,	0	-5.69	-4.89	2.47	1
chr1	152006161	152009481	6282	1.6e-20	-	152006161	152009481	0	2	115,93,	0,3227	-19.8	-18.5	22.5	1
chr1	115282331	115284148	7812	2.6e-07	-	115282331	115284148	0	2	180,1,	0,1816	-6.58	-5.46	4.67	1
chr14	92588297	92592470	53981	6.3e-21	+	92588297	92592470	0	2	175,5,	0,4168	-20.2	-18.8	31.2	1
chr8	53626726	53627026	9821	1.3e-26	-	53626726	53627026	0	1	300,	0	-25.9	-24.6	10.9	1
chr2	70523585	70523706	84908	0.00044	-	70523585	70523706	0	1	121,	0	-3.36	-2.35	1.53	1
chr6	15520984	15521284	3720	1e-11	+	15520984	15521284	0	1	300,	0	-11	-9.45	3.14	1
chr9	131395939	131396513	89891	1.6e-49	-	131395939	131396513	0	2	322,9,	0,565	-48.8	-47	74.9	1
chr17	48503578	48503728	80221	2e-06	+	48503578	48503728	0	1	150,	0	-5.69	-4.74	15	1
chr14	67648194	67648495	10243	4e-19	+	67648194	67648495	0	1	301,	0	-18.4	-17.3	5.23	1
chr8	38705484	38705635	6867	0.0022	+	38705484	38705635	0	1	151,	0	-2.66	-1.86	2.21	1
chr21	45181169	45182188	8566	1e-169	+	45181169	45182188	0	1	1019,	0	-169	-167	15.4	1
chr1	116947819	116948598	84852	6.3e-21	-	116947819	116948598	0	1	779,	0	-20.2	-19.2	10.8	1
chr1	19923530	19927327	100532736	0.0011	+	19923530	19927327	0	2	73,47,	0,3750	-2.96	-2.01	1.28	1
chr4	13604599	13604660	259282	0.0011	-	13604599	13604660	0	1	61,	0	-2.97	-2.01	2.31	1
chr9	98270489	98278768	5727	0.00036	-	98270489	98278768	0	2	342,18,	0,8261	-3.44	-2.61	10.7	1
chr6	119669630	119669870	4121	7.4e-07	-	119669630	119669870	0	1	240,	0	-6.13	-5.29	6.9	1
chr16	589186	589427	6650	6.3e-12	+	589186	589427	0	1	241,	0	-11.2	-10.3	6.41	1
chr8	33313402	33330634	84750	5e-16	-	33313402	33330634	0	4	11,60,354,53,	0,4827,5487,17179	-15.3	-14.3	28.5	1
chr1	161093968	161102359	9191	1.2e-08	-	161093968	161102359	0	4	348,33,76,19,	0,6636,8212,8372	-7.92	-6.51	2.27	1
chr11	45247919	45248070	56981	1e-06	+	45247919	45248070	0	1	151,	0	-5.99	-5.04	8.01	1
chr3	57612911	57613151	201627	8.9e-10	-	57612911	57613151	0	1	240,	0	-9.05	-7.48	7.95	1
chr11	134135327	134135567	27034	2.2e-10	+	134135327	134135567	0	1	240,	0	-9.66	-8.72	4.26	1
chr14	31364201	31364741	29966	1e-153	-	31364201	31364741	0	1	540,	0	-153	-151	8.84	1
chr14	53619416	53619716	80821	6.3e-27	-	53619416	53619716	0	1	300,	0	-26.2	-25.1	8.87	1
chr3	190985834	190986103	257313	3.6e-05	-	190985834	190986103	0	1	269,	0	-4.44	-3.25	3.27	1
chr8	128752844	128753680	4609	0	+	128752844	128753680	0	1	836,	0	-3400	#NAME?	209	1
chr4	151177530	151178518	166614	1e-61	+	151177530	151178518	0	1	988,	0	-61	-59.5	41.4	1
chr19	14260497	14260828	22859	1e-17	-	14260497	14260828	0	1	331,	0	-17	-15.9	7.35	1
chr10	71911480	71917593	56681	7.9e-80	-	71911480	71917593	0	3	868,132,74,	0,2113,6039	-79.1	-77.5	26.2	1
chr5	141318446	141318596	9812	0.00017	+	141318446	141318596	0	1	150,	0	-3.76	-2.9	5.86	1
chr17	58422893	58469317	84669	7.6e-05	-	58422893	58469317	0	2	76,75,	0,46349	-4.12	-2.87	1.79	1
chr4	104079772	104080345	1062	3.2e-27	-	104079772	104080345	0	2	271,179,	0,394	-26.5	-25.3	2.87	1
chr12	66517439	66524529	84298	3.2e-54	-	66517439	66524529	0	3	359,218,45,	0,5236,7045	-53.5	-51.3	2.71	1
chr19	58290250	58290490	54807	6.3e-15	+	58290250	58290490	0	1	240,	0	-14.2	-13.2	10.6	1
chr16	2689819	2690418	645644	4e-15	+	2689819	2690418	0	1	599,	0	-14.4	-13.4	16.1	1
chr3	128198981	128200027	2624	1e-106	-	128198981	128200027	0	1	1046,	0	-106	-104	14	1
chr14	104164942	104165243	7517	9.3e-09	-	104164942	104165243	0	1	301,	0	-8.03	-7.01	2.89	1
chr10	15139385	15139534	10557	0.00026	+	15139385	15139534	0	1	149,	0	-3.58	-2.84	5.65	1
chr8	104337302	104337662	8323	1e-17	+	104337302	104337662	0	1	360,	0	-17	-15.9	8.23	1
chr4	41648693	41664924	22998	5.9e-09	+	41648693	41664924	0	4	217,216,91,105,	0,3716,14743,16126	-8.23	-7.23	13.7	1
chr7	151818827	151819008	63917	3.5e-05	+	151818827	151819008	0	1	181,	0	-4.45	-3.34	2.06	1
chr6	119137039	119137370	254394	0.00011	-	119137039	119137370	0	1	331,	0	-3.96	-3.04	9.68	1
chr6	64395274	64395903	23469	1.6e-24	+	64395274	64395903	0	1	629,	0	-23.8	-22.7	11.9	1
chr9	109690128	109690398	58499	8.5e-06	+	109690128	109690398	0	1	270,	0	-5.07	-4.27	4.16	1
chr19	3926914	3927243	85300	1e-18	+	3926914	3927243	0	1	329,	0	-18	-16.1	10.4	1
chr19	1065270	1065570	10347	0	+	1065270	1065570	0	1	300,	0	-447	#NAME?	48.3	1
chr17	79518039	79518160	80233	0.00012	-	79518039	79518160	0	1	121,	0	-3.93	-3.04	2.95	1
chr5	179201526	179201945	9794	2e-19	+	179201526	179201945	0	1	419,	0	-18.7	-17.4	53.5	1
chr3	150128583	150140863	9819	1.9e-09	+	150128583	150140863	0	2	512,28,	0,12252	-8.71	-7.32	2.5	1
chr13	111371684	111372463	3621	1e-199	+	111371684	111372463	0	1	779,	0	-199	-197	29.3	1
chr17	40950564	40950713	28958	4.7e-05	-	40950564	40950713	0	1	149,	0	-4.33	-3.38	1.37	1
chr5	135514441	135514981	4090	1.7e-10	+	135514441	135514981	0	1	540,	0	-9.78	-8.33	2.92	1
chr3	40351291	40351351	10289	0.00079	+	40351291	40351351	0	1	60,	0	-3.1	-2.13	1.61	1
chr22	20073475	20074191	54487	3.9e-08	+	20073475	20074191	0	1	716,	0	-7.41	-6.1	2.34	1
chr21	37741354	37744689	23515	1e-160	+	37741354	37744689	0	2	820,18,	0,3317	-160	-158	14.8	1
chr12	113629231	113629823	84934	1.7e-07	+	113629231	113629823	0	1	592,	0	-6.78	-5.74	3.56	1
chr15	41247727	41248567	79094	1e-195	+	41247727	41248567	0	1	840,	0	-195	-193	20.6	1
chr10	51565137	51576317	8031	4e-06	+	51565137	51576317	0	4	159,97,129,33,	0,3156,7226,11147	-5.4	-4.43	6.25	1
chr17	34151156	34163230	8148	1.7e-05	+	34151156	34163230	0	4	46,35,33,95,	0,9754,10413,11979	-4.76	-3.62	1.41	1
chr19	18545197	18545408	51477	1e-125	-	18545197	18545408	0	1	211,	0	-125	-123	47.8	1
chr9	109690517	109690668	58499	0.0004	+	109690517	109690668	0	1	151,	0	-3.4	-2.39	2.41	1
chr22	21306451	21308037	1399	1e-127	+	21306451	21308037	0	1	1586,	0	-127	-125	83.3	1
chr16	4854453	4861177	84656	3.2e-16	-	4854453	4861177	0	2	858,7,	0,6717	-15.5	-14	2.18	1
chr5	177310977	177311186	728554	1.1e-08	+	177310977	177311186	0	1	209,	0	-7.94	-6.94	8.49	1
chr16	72821344	72828991	463	1e-136	-	72821344	72828991	0	2	1403,1838,	0,5809	-136	-135	26.4	1
chr6	7283294	7283475	6745	0.0001	-	7283294	7283475	0	1	181,	0	-4	-2.86	3.25	1
chr17	61432195	61432675	26115	1.6e-09	+	61432195	61432675	0	1	480,	0	-8.8	-7.93	3.37	1
chr19	11039906	11040708	90580	1e-83	+	11039906	11040708	0	1	802,	0	-83	-81	31.7	1
chr16	75633377	75634182	23536	2.5e-21	-	75633377	75634182	0	1	805,	0	-20.6	-19.4	50	1
chr4	68587251	68587402	550112	0.00033	+	68587251	68587402	0	1	151,	0	-3.48	-2.75	2.45	1
chr6	99728665	99739605	84553	1e-148	-	99728665	99739605	0	2	664,26,	0,10914	-148	-146	24.1	1
chr4	86916281	86922030	83478	2e-23	+	86916281	86922030	0	2	529,399,	0,5350	-22.7	-21.6	43.9	1
chr2	114472346	114472705	80255	5e-10	-	114472346	114472705	0	1	359,	0	-9.3	-8.42	2.04	1
chr1	203276882	203276972	7832	0.0026	+	203276882	203276972	0	1	90,	0	-2.58	-1.57	1.79	1
chr12	56142411	56143587	10220	6.3e-66	+	56142411	56143587	0	2	356,302,	0,874	-65.2	-63.7	16.2	1
chr10	89503163	89503224	9060	0.003	+	89503163	89503224	0	1	61,	0	-2.53	-1.98	10	1
chr5	139937351	139937560	10011	1.6e-12	-	139937351	139937560	0	1	209,	0	-11.8	-10.7	9.84	1
chr22	18272394	18273084	57553	1.3e-59	-	18272394	18273084	0	1	690,	0	-58.9	-57.5	21.8	1
chr7	104758051	104758381	6733	2e-53	-	104758051	104758381	0	1	330,	0	-52.7	-51.3	7.35	1
chr16	85711636	85712166	51659	3.2e-100	-	85711636	85712166	0	2	307,21,	0,509	-99.5	-97.8	2.9	1
chr1	247012928	247013469	25909	1e-155	-	247012928	247013469	0	1	541,	0	-155	-153	8.51	1
chr19	40519666	40520711	339327	1e-31	+	40519666	40520711	0	1	1045,	0	-31	-29.7	7.37	1
chr9	134371202	134371892	84726	1e-109	+	134371202	134371892	0	1	690,	0	-109	-107	9.35	1
chr15	25615812	25616683	7337	5e-21	-	25615812	25616683	0	1	871,	0	-20.3	-18.2	2.92	1
chr1	246810465	246811273	163882	1e-60	+	246810465	246811273	0	1	808,	0	-60	-58.5	11.8	1
chr11	6555276	6559635	144132	0.00074	+	6555276	6559635	0	2	127,23,	0,4336	-3.13	-2.31	2.85	1
chr5	36975979	36985003	25836	3.2e-23	+	36975979	36985003	0	2	525,226,	0,8798	-22.5	-20.5	3.44	1
chr4	114822935	114900848	79642	1e-180	-	114822935	114900848	0	3	1896,81,1256,	0,4885,76657	-180	-178	163	1
chr16	85121986	85122317	9764	2.1e-05	+	85121986	85122317	0	1	331,	0	-4.68	-3.78	7.48	1
chr8	53586528	53586798	9821	3.4e-06	-	53586528	53586798	0	1	270,	0	-5.47	-4.44	2.25	1
chr3	194392818	194392968	55341	6.5e-05	-	194392818	194392968	0	1	150,	0	-4.19	-3.31	11.8	1
chr4	89442481	89442983	100996939	1e-46	-	89442481	89442983	0	1	502,	0	-46	-44.6	31.5	1
chr6	15496374	15497214	3720	0	+	15496374	15497214	0	1	840,	0	#NAME?	#NAME?	57	1
chr15	55651694	55657403	9236	1e-156	-	55651694	55657403	0	2	1448,18,	0,5691	-156	-154	14.7	1
chr16	11773002	11773241	51061	6.3e-10	-	11773002	11773241	0	1	239,	0	-9.2	-7.98	4.24	1
chr14	75550912	75553752	91754	1e-13	-	75550912	75553752	0	2	477,32,	0,2808	-13	-11.7	4.71	1
chr1	151020407	151020468	54964	0.00052	+	151020407	151020468	0	1	61,	0	-3.28	-2.45	2.42	1
chrX	57021718	57021988	169981	4e-16	-	57021718	57021988	0	1	270,	0	-15.4	-14.2	4.58	1
chr17	54912276	54912457	8526	8.5e-07	+	54912276	54912457	0	1	181,	0	-6.07	-5.26	3.42	1
chr5	149907405	149907854	3340	2.5e-15	+	149907405	149907854	0	1	449,	0	-14.6	-13.6	5.23	1
chr7	134896135	134896286	29062	4.7e-06	-	134896135	134896286	0	1	151,	0	-5.33	-4.48	2.85	1
chr15	65916310	65917539	9187	3.2e-19	+	65916310	65917539	0	1	1229,	0	-18.5	-17.4	9.14	1
chr19	12383224	12384871	51710	5e-34	-	12383224	12384871	0	1	1647,	0	-33.3	-32.1	98.7	1
chr8	8234843	8235500	157285	1.3e-27	-	8234843	8235500	0	1	657,	0	-26.9	-25.4	85	1
chr16	85126359	85126570	9764	8.7e-09	+	85126359	85126570	0	1	211,	0	-8.06	-7.14	14.3	1
chr4	170909599	170909869	9848	2.5e-15	-	170909599	170909869	0	1	270,	0	-14.6	-13.7	12.9	1
chr1	230457930	230458081	79605	1.3e-05	-	230457930	230458081	0	1	151,	0	-4.9	-3.57	4.13	1
chr7	43906156	43906389	64951	3e-09	-	43906156	43906389	0	1	233,	0	-8.52	-7.3	24.7	1
chr1	29474756	29474966	6429	2.1e-06	-	29474756	29474966	0	1	210,	0	-5.68	-4.34	1.83	1
chrX	153063847	153063967	6748	6.3e-13	+	153063847	153063967	0	1	120,	0	-12.2	-11.1	2.37	1
chr1	27930270	27930361	27245	0.0024	-	27930270	27930361	0	1	91,	0	-2.62	-1.83	10.8	1
chr18	33077715	33077955	125476	7.9e-15	-	33077715	33077955	0	1	240,	0	-14.1	-13.2	3.55	1
chr12	100732334	100732901	55681	8.1e-08	+	100732334	100732901	0	1	567,	0	-7.09	-5.78	3.24	1
chr18	32844085	32847464	100101467	6.3e-29	-	32844085	32847464	0	2	334,25,	0,3354	-28.2	-27	10	1
chr2	136481555	136481944	23518	6.3e-17	+	136481555	136481944	0	1	389,	0	-16.2	-14.9	4.85	1
chr11	72548566	72548926	9873	1.3e-43	-	72548566	72548926	0	1	360,	0	-42.9	-41.6	6.54	1
chr6	34985353	35005995	23294	5e-19	+	34985353	35005995	0	2	483,26,	0,20616	-18.3	-17	58.9	1
chr19	15224500	15225460	85360	0	+	15224500	15225460	0	1	960,	0	-388	#NAME?	39.5	1
chrX	129546358	129546808	51634	2e-12	+	129546358	129546808	0	1	450,	0	-11.7	-10.2	2.55	1
chr7	30673408	30673648	2617	3.2e-18	+	30673408	30673648	0	1	240,	0	-17.5	-16.2	3.25	1
chr19	42880346	42881065	1954	6.3e-28	+	42880346	42881065	0	1	719,	0	-27.2	-25.8	18.5	1
chr6	36181744	36181955	27154	2.1e-07	+	36181744	36181955	0	1	211,	0	-6.67	-5.57	2.83	1
chr3	45589850	45590239	23395	3.2e-57	+	45589850	45590239	0	1	389,	0	-56.5	-55.1	4.05	1
chr1	160248626	160248716	5824	0.0017	-	160248626	160248716	0	1	90,	0	-2.78	-1.7	1.77	1
chr19	10943109	10944070	1785	1.3e-25	+	10943109	10944070	0	1	961,	0	-24.9	-23.4	79	1
chr8	28574554	28588796	2137	7.9e-72	+	28574554	28588796	0	2	1170,57,	0,14185	-71.1	-69.1	115	1
chr17	80559184	80560684	3607	0	+	80559184	80560684	0	1	1500,	0	-664	#NAME?	18.1	1
chr14	105418727	105418938	113146	2e-11	-	105418727	105418938	0	1	211,	0	-10.7	-9.66	4.94	1
chr9	95377112	95381769	64768	6.3e-23	-	95377112	95381769	0	2	1227,2,	0,4655	-22.2	-21	11.5	1
chr18	13055804	13056674	55125	1.3e-38	+	13055804	13056674	0	1	870,	0	-37.9	-36.6	13.7	1
chr6	111877178	111877299	10758	0.002	-	111877178	111877299	0	1	121,	0	-2.69	-1.72	3.09	1
chr16	3458344	3459304	7727	5e-44	+	3458344	3459304	0	1	960,	0	-43.3	-42	27.1	1
chr17	40733432	40734790	162427	1.6e-96	-	40733432	40734790	0	2	856,99,	0,1259	-95.8	-94.1	39	1
chr17	74945158	74945457	146664	4.6e-05	+	74945158	74945457	0	1	299,	0	-4.34	-3.38	3.31	1
chr7	152161919	152162452	100128822	1.6e-55	+	152161919	152162452	0	1	533,	0	-54.8	-53.4	8.73	1
chr5	137843004	137844449	2107	1e-154	-	137843004	137844449	0	2	1072,92,	0,1353	-154	-152	21.5	1
chr18	60382791	60382912	23239	0.0074	+	60382791	60382912	0	1	121,	0	-2.13	-1.64	8.7	1
chr3	15114843	15117135	64145	2e-95	-	15114843	15117135	0	2	1594,23,	0,2269	-94.7	-93	21.4	1
chr1	89298974	89299304	5586	9.881313e-323	+	89298974	89299304	0	1	330,	0	-322	-320	15.6	1
chr13	38935856	38936126	51569	7.9e-51	+	38935856	38936126	0	1	270,	0	-50.1	-48.8	3.31	1
chr1	26146396	26146799	56181	8.9e-06	+	26146396	26146799	0	2	124,116,	0,287	-5.05	-4.1	7.81	1
chr12	49426859	49427040	8085	1.5e-10	-	49426859	49427040	0	1	181,	0	-9.83	-8.82	6.82	1
chr12	123738221	123738610	91574	1.3e-68	+	123738221	123738610	0	1	389,	0	-67.9	-66.5	8.92	1
chr1	43316621	43316951	51058	6.3e-48	+	43316621	43316951	0	1	330,	0	-47.2	-45.8	11.3	1
chr14	73490858	73493710	53349	2.5e-25	-	73490858	73493710	0	2	792,77,	0,2775	-24.6	-23.4	46.4	1
chr1	154243447	154243896	9898	5.2e-08	+	154243447	154243896	0	1	449,	0	-7.28	-6.45	6.93	1
chr16	1004425	1004605	64788	1.4e-07	-	1004425	1004605	0	1	180,	0	-6.85	-5.88	4.35	1
chr12	33030907	33031358	5318	7.2e-06	-	33030907	33031358	0	1	451,	0	-5.14	-3.97	2.56	1
chr7	65824027	65824898	8460	5e-27	+	65824027	65824898	0	2	433,17,	0,854	-26.3	-25.2	38.6	1
chr1	990242	991230	375790	1e-222	+	990242	991230	0	1	988,	0	-222	-218	3.19	1
chr17	79005530	79006875	440465	1e-18	-	79005530	79006875	0	1	1345,	0	-18	-17	26.9	1
chr7	155100060	155100420	3638	6.3e-16	+	155100060	155100420	0	1	360,	0	-15.2	-14.3	1.78	1
chr7	97836520	97836850	22853	3.2e-16	+	97836520	97836850	0	1	330,	0	-15.5	-14.5	7.46	1
chr12	95602646	95602887	55785	1.6e-13	-	95602646	95602887	0	1	241,	0	-12.8	-11.8	7	1
chr7	47315439	47319903	64759	1e-227	-	47315439	47319903	0	3	2379,27,20,	0,4322,4444	-227	-225	13.5	1
chr22	23503993	23504740	9609	2e-16	+	23503993	23504740	0	1	747,	0	-15.7	-14.7	8.85	1
chr3	155544360	155544601	9197	1.3e-16	-	155544360	155544601	0	1	241,	0	-15.9	-14.9	3.7	1
chr7	6063018	6063465	7965	1e-135	+	6063018	6063465	0	1	447,	0	-135	-133	4.49	1
chr16	31044853	31045060	6810	2.5e-43	+	31044853	31045060	0	1	207,	0	-42.6	-41.3	100	1
chr10	48371087	48371596	118738	7.6e-06	+	48371087	48371596	0	1	509,	0	-5.12	-4.2	11.8	1
chr1	221912394	221912545	11221	0.00021	-	221912394	221912545	0	1	151,	0	-3.68	-2.53	4.07	1
chr4	170641077	170641706	1182	4e-78	+	170641077	170641706	0	1	629,	0	-77.4	-75.9	6.99	1
chr5	179229207	179229715	11282	1.3e-100	-	179229207	179229715	0	1	508,	0	-99.9	-98.4	136	1
chr16	12662640	12662880	92017	5e-15	+	12662640	12662880	0	1	240,	0	-14.3	-13.2	24.1	1
chr1	183515149	183515300	9887	5.6e-08	+	183515149	183515300	0	1	151,	0	-7.25	-6.42	2.81	1
chr7	82581536	82582855	27445	2e-14	-	82581536	82582855	0	1	1319,	0	-13.7	-12.7	19.1	1
chr10	99969191	99969611	27291	6.3e-100	+	99969191	99969611	0	1	420,	0	-99.2	-97.4	10.9	1
chr7	2291554	2292272	29886	6.3e-23	-	2291554	2292272	0	1	718,	0	-22.2	-20.5	3.18	1
chr22	41924315	41925273	171568	2.5e-59	-	41924315	41925273	0	1	958,	0	-58.6	-55.9	3.96	1
chr20	61488793	61490728	10732	4.8e-07	-	61488793	61490728	0	2	197,13,	0,1922	-6.32	-4.93	1.99	1
chr13	88330049	88330945	26050	1e-191	+	88330049	88330945	0	1	896,	0	-191	-189	34	1
chr1	169822512	169824973	57147	1.3e-29	-	169822512	169824973	0	3	401,695,37,	0,898,2424	-28.9	-27.7	6.26	1
chr4	40156729	40157029	55728	5.4e-09	+	40156729	40157029	0	1	300,	0	-8.27	-6.75	5.86	1
chr19	53958497	53958647	388561	0.00013	+	53958497	53958647	0	1	150,	0	-3.89	-3.14	16.7	1
chr6	96034314	96034882	79694	1e-137	+	96034314	96034882	0	1	568,	0	-137	-135	16.7	1
chr11	62290293	62297424	79026	0	-	62290293	62297424	0	1	7131,	0	-674	#NAME?	37.5	1
chr17	7417186	7417277	5430	0.00021	+	7417186	7417277	0	1	91,	0	-3.67	-2.47	1.45	1
chr2	65299122	65299840	23177	5.6e-09	+	65299122	65299840	0	1	718,	0	-8.25	-6.64	2.55	1
chr15	44876054	44877939	80208	3.2e-74	-	44876054	44877939	0	2	702,106,	0,1779	-73.5	-71.9	33.4	1
chr11	57426928	57427286	10978	1e-11	+	57426928	57427286	0	1	358,	0	-11	-9.47	2.27	1
chr15	74327567	74328586	5371	1.6e-23	+	74327567	74328586	0	1	1019,	0	-22.8	-20.9	2.58	1
chr17	47755314	47755465	8405	0.00059	-	47755314	47755465	0	1	151,	0	-3.23	-2.37	2.61	1
chr18	11851388	11852709	57132	1e-279	+	11851388	11852709	0	1	1321,	0	-279	-277	16.6	1
chr12	32133834	32136202	55196	2e-29	+	32133834	32136202	0	1	2368,	0	-28.7	-27.5	35.7	1
chr14	74425952	74426133	51004	5e-14	+	74425952	74426133	0	1	181,	0	-13.3	-12.3	12.7	1
chr8	67576666	67578164	80124	1e-85	-	67576666	67578164	0	1	1498,	0	-85	-83.4	56.2	1
chr12	26491671	26493195	3709	1e-31	-	26491671	26493195	0	2	745,96,	0,1428	-31	-29.8	14.8	1
chr2	202031895	202032136	8837	1.9e-07	+	202031895	202032136	0	1	241,	0	-6.73	-5.91	11.8	1
chr2	109745996	109746357	344558	3.3e-07	+	109745996	109746357	0	1	361,	0	-6.48	-5.22	4.4	1
chr19	44738953	44739013	9310	0.00015	-	44738953	44739013	0	1	60,	0	-3.81	-3.06	7.73	1
chr5	79732627	79734724	9765	1e-182	+	79732627	79734724	0	1	2097,	0	-182	-180	11.4	1
chr11	66458811	66460019	6712	2.5e-28	-	66458811	66460019	0	2	318,13,	0,1195	-27.6	-26.2	6.58	1
chr9	90581957	90582198	23552	1e-23	-	90581957	90582198	0	1	241,	0	-23	-21.8	10	1
chr19	3619205	3620883	58509	5e-19	-	3619205	3620883	0	3	35,146,179,	0,919,1499	-18.3	-16.7	3.68	1
chr19	9945942	9946226	5300	2.4e-09	+	9945942	9946226	0	2	136,105,	0,179	-8.62	-7.17	4.11	1
chr17	57776422	57777228	51651	7.9e-37	-	57776422	57777228	0	1	806,	0	-36.1	-34.9	9.12	1
chr9	20995714	20995924	54914	7.9e-19	+	20995714	20995924	0	1	210,	0	-18.1	-17	4.74	1
chr12	110466080	110466291	88455	7.9e-18	+	110466080	110466291	0	1	211,	0	-17.1	-16.1	5.68	1
chr6	83838630	83839109	23033	3.2e-67	+	83838630	83839109	0	1	479,	0	-66.5	-65.1	11.3	1
chr5	67522133	67522763	5295	7.9e-36	+	67522133	67522763	0	1	630,	0	-35.1	-33.9	14.9	1
chr20	2815960	2816350	64773	1e-149	-	2815960	2816350	0	1	390,	0	-149	-147	40.4	1
chr17	57474475	57474716	388403	2.6e-07	+	57474475	57474716	0	1	241,	0	-6.59	-5.49	3.35	1
chr19	49253366	49253937	2523	2.5e-14	-	49253366	49253937	0	1	571,	0	-13.6	-12.4	15.2	1
chr14	104025924	104028317	9529	1e-121	-	104025924	104028317	0	2	1605,68,	0,2325	-121	-119	36.5	1
chr11	106810221	106810762	2977	2.2e-06	-	106810221	106810762	0	1	541,	0	-5.65	-4.85	16.5	1
chr2	237033515	237034416	116987	1.6e-26	+	237033515	237034416	0	1	901,	0	-25.8	-24.7	9.99	1
chr14	93263779	93264048	9950	5e-13	+	93263779	93264048	0	1	269,	0	-12.3	-10.9	12.8	1
chr10	97915983	97917807	9849	1e-209	+	97915983	97917807	0	1	1824,	0	-209	-206	16.3	1
chr11	32955656	32979436	79832	0	+	32955656	32979436	0	5	1325,323,117,134,22,	0,19746,21185,21877,23758	-702	#NAME?	72	1
chr9	139252475	139252655	26086	6.2e-06	+	139252475	139252655	0	1	180,	0	-5.21	-4.39	18.7	1
chr15	40845828	40846127	90416	2.8e-05	-	40845828	40846127	0	1	299,	0	-4.56	-3.44	2.46	1
chr11	20065792	20066578	89797	0.0012	+	20065792	20066578	0	2	26,65,	0,721	-2.92	-1.82	1.79	1
chr14	68215003	68215243	23503	0.00021	-	68215003	68215243	0	1	240,	0	-3.68	-2.64	2.86	1
chr1	156209452	156209660	11243	4e-21	+	156209452	156209660	0	1	208,	0	-20.4	-19	4.07	1
chr7	38764587	38765544	27072	2.5e-48	-	38764587	38765544	0	1	957,	0	-47.6	-46.2	19	1
chr10	119768158	119805547	22841	1e-126	-	119768158	119805547	0	6	578,46,60,469,443,226,	0,6417,25334,30324,31475,37163	-126	-124	171	1
chr19	58991970	58992537	55663	5e-22	+	58991970	58992537	0	1	567,	0	-21.3	-20	22.2	1
chr6	34845878	34846497	6882	5.6e-10	-	34845878	34846497	0	1	619,	0	-9.25	-7.66	2.16	1
chr1	154193348	154193825	9898	7.9e-08	+	154193348	154193825	0	2	168,12,	0,465	-7.1	-6.05	5.5	1
chr12	95907456	95908326	10988	0	+	95907456	95908326	0	1	870,	0	-339	#NAME?	6.74	1
chr17	20107711	20109208	92521	1e-140	+	20107711	20109208	0	1	1497,	0	-140	-138	13.9	1
chr20	31025413	31025893	171023	1.5e-09	+	31025413	31025893	0	1	480,	0	-8.83	-7.36	3.18	1
chr8	95442302	95442482	25788	6.5e-05	-	95442302	95442482	0	1	180,	0	-4.19	-3.03	2.99	1
chr18	24127020	24128873	284252	1e-199	-	24127020	24128873	0	2	1480,19,	0,1834	-199	-197	127	1
chr17	80279669	80280174	6398	1e-29	-	80279669	80280174	0	1	505,	0	-29	-27.7	7.53	1
chr2	101612152	101612302	4862	1.1e-05	+	101612152	101612302	0	1	150,	0	-4.95	-4.04	4.54	1
chr9	33038703	33039062	3301	1e-139	+	33038703	33039062	0	1	359,	0	-139	-137	17.8	1
chr6	43472830	43473757	93643	2.2e-07	+	43472830	43473757	0	1	927,	0	-6.65	-5.37	2.68	1
chr6	2887949	2888069	5272	0.00083	-	2887949	2888069	0	1	120,	0	-3.08	-2.06	5.64	1
chr21	47786524	47801678	5116	0	+	47786524	47801678	0	2	530,70,	0,15084	#NAME?	#NAME?	43	1
chr10	25010768	25010949	57584	0.00017	-	25010768	25010949	0	1	181,	0	-3.76	-2.8	13.9	1
chr20	62493186	62493868	140701	1e-72	+	62493186	62493868	0	1	682,	0	-72	-70.2	18.9	1
chr4	152025319	152025744	6189	4e-12	+	152025319	152025744	0	2	119,121,	0,304	-11.4	-10.3	4.5	1
chr19	56652564	56657693	55311	0.00018	+	56652564	56657693	0	2	162,78,	0,5051	-3.75	-2.89	5.21	1
chr13	28155470	28155889	222484	3.2e-66	-	28155470	28155889	0	1	419,	0	-65.5	-64	9.48	1
chr3	52083774	52085003	1849	1.3e-08	-	52083774	52085003	0	1	1229,	0	-7.9	-6.74	2.87	1
chr17	15952206	15952296	9611	0.0012	-	15952206	15952296	0	1	90,	0	-2.93	-2.33	11.4	1
chr3	188327011	188426064	4026	1e-173	+	188327011	188426064	0	2	621,10,	0,99043	-173	-171	26.4	1
chr19	7928338	7928608	115704	3.2e-24	+	7928338	7928608	0	1	270,	0	-23.5	-22.4	32.5	1
chr5	149363972	149364212	1836	6.8e-05	+	149363972	149364212	0	1	240,	0	-4.17	-3.01	2.89	1
chr9	119460130	119462140	22954	1e-141	+	119460130	119462140	0	1	2010,	0	-141	-139	19.4	1
chr19	48949968	48953618	83743	4.8e-05	+	48949968	48953618	0	2	132,49,	0,3601	-4.32	-3.37	1.41	1
chr6	31432331	31432660	10866	1.8e-05	+	31432331	31432660	0	1	329,	0	-4.75	-3.81	4.77	1
chr9	116812158	116812668	114991	4.2e-08	+	116812158	116812668	0	1	510,	0	-7.38	-6.24	11.3	1
chr1	24128665	24129024	3155	1.3e-22	-	24128665	24129024	0	1	359,	0	-21.9	-20.8	3.97	1
chr9	129595978	129596367	23099	3.4e-10	+	129595978	129596367	0	1	389,	0	-9.47	-8.04	3.76	1
chr19	14640408	14655959	9524	0.00079	+	14640408	14655959	0	2	115,34,	0,15517	-3.1	-1.98	1.68	1
chr14	51288634	51297231	51199	1.4e-05	-	51288634	51297231	0	2	161,50,	0,8547	-4.86	-3.53	2.29	1
chr20	43995617	43996127	90196	5e-12	+	43995617	43996127	0	1	510,	0	-11.3	-9.73	2.42	1
chr6	3723013	3723844	221749	1.3e-11	-	3723013	3723844	0	1	831,	0	-10.9	-9.63	3.08	1
chr8	145057570	145058379	84875	2e-34	-	145057570	145058379	0	3	409,97,2,	0,605,807	-33.7	-32.3	4.86	1
chr9	139390662	139390872	4851	0.00044	-	139390662	139390872	0	1	210,	0	-3.36	-2.49	2.35	1
chr3	10354591	10354860	6396	4e-16	-	10354591	10354860	0	1	269,	0	-15.4	-14.4	8.41	1
chr6	71234142	71234981	57579	3.2e-39	+	71234142	71234981	0	1	839,	0	-38.5	-37.3	11.7	1
chr16	68349806	68349956	54496	0.0012	+	68349806	68349956	0	1	150,	0	-2.93	-2.33	11.4	1
chr15	41191755	41193104	57617	6.3e-52	+	41191755	41193104	0	1	1349,	0	-51.2	-49.9	11.4	1
chr19	1912115	1913446	113179	2e-43	+	1912115	1913446	0	1	1331,	0	-42.7	-41	20.9	1
chr15	89021115	89021325	64963	1.6e-06	+	89021115	89021325	0	1	210,	0	-5.79	-4.79	2.29	1
chr16	48395162	48399372	6477	2e-69	-	48395162	48399372	0	2	1179,75,	0,4135	-68.7	-67.1	33.9	1
chr22	31366052	31368149	55000	1e-157	+	31366052	31368149	0	2	1713,116,	0,1981	-157	-156	65.7	1
chr7	91726289	91726410	10142	3.1e-05	+	91726289	91726410	0	1	121,	0	-4.51	-3.22	3.45	1
chr9	138702637	138706991	157922	1e-103	-	138702637	138706991	0	2	820,49,	0,4305	-103	-102	17.3	1
chr15	85163860	85164220	54993	8.1e-07	+	85163860	85164220	0	1	360,	0	-6.09	-5.02	7.89	1
chr19	41937551	41937821	55101	4.8e-06	-	41937551	41937821	0	1	270,	0	-5.32	-4.14	1.77	1
chr7	154760644	154760765	22976	0.00019	-	154760644	154760765	0	1	121,	0	-3.72	-2.52	9.43	1
chr12	69235101	69236867	4193	0	+	69235101	69236867	0	1	1766,	0	-452	#NAME?	133	1
chr16	8889302	8891505	25880	1e-183	-	8889302	8891505	0	2	1145,37,	0,2166	-183	-181	97	1
chr9	139368645	139371878	9919	1e-160	-	139368645	139371878	0	1	3233,	0	-160	-158	75.8	1
chr1	155736267	155737222	54856	7.6e-07	-	155736267	155737222	0	2	233,7,	0,948	-6.12	-5.25	9.36	1
chr7	47385794	47407981	64759	3.2e-14	-	47385794	47407981	0	2	160,20,	0,22167	-13.5	-12.5	2.4	1
chr12	107380764	107380884	80298	8.3e-05	-	107380764	107380884	0	1	120,	0	-4.08	-3.19	4.34	1
chr14	103806858	103807350	1983	0.00038	+	103806858	103807350	0	2	40,51,	0,441	-3.42	-2.36	2.11	1
chr7	100861373	100861714	10467	6.3e-14	+	100861373	100861714	0	2	125,115,	0,226	-13.2	-12	8.3	1
chr9	139301638	139301877	10807	4.1e-08	-	139301638	139301877	0	1	239,	0	-7.39	-6.25	2.2	1
chr12	69979237	69979543	10576	0.00035	+	69979237	69979543	0	2	67,82,	0,224	-3.45	-2.41	1.32	1
chr19	15464331	15464632	10270	1.4e-07	-	15464331	15464632	0	1	301,	0	-6.84	-6.01	3.66	1
chr12	12941611	12941882	81575	1e-05	+	12941611	12941882	0	1	271,	0	-5	-4.16	6.02	1
chr13	50586158	50587328	10206	1.6e-47	+	50586158	50587328	0	1	1170,	0	-46.8	-45.4	156	1
chr17	73918162	73919431	85302	1.5e-06	-	73918162	73919431	0	2	15,165,	0,1104	-5.81	-4.85	5.61	1
chr12	109972266	109972805	89910	4e-18	+	109972266	109972805	0	1	539,	0	-17.4	-16.1	7.16	1
chr17	9817519	9817790	8522	4e-11	-	9817519	9817790	0	1	271,	0	-10.4	-8.76	14.2	1
chr14	74961536	74961742	122961	1.8e-07	+	74961536	74961742	0	1	206,	0	-6.75	-5.46	2.12	1
chr15	69488809	69489379	26035	1.6e-34	+	69488809	69489379	0	1	570,	0	-33.8	-32.6	38.5	1
chr20	62421173	62421473	140685	7.9e-11	-	62421173	62421473	0	1	300,	0	-10.1	-9.19	3.52	1
chr14	53244758	53258206	64841	6.3e-20	-	53244758	53258206	0	6	418,62,128,63,168,61,	0,2638,3743,5382,6456,13387	-19.2	-18.1	8.07	1
chr12	9093010	9093341	1911	1e-21	+	9093010	9093341	0	1	331,	0	-21	-19.9	7.59	1
chr5	172384251	172385380	100268168	4.7e-05	-	172384251	172385380	0	3	54,119,6,	0,890,1123	-4.33	-3.15	12.6	1
chr9	131678489	131678910	56262	5e-25	+	131678489	131678910	0	1	421,	0	-24.3	-23.2	12.2	1
chr14	92964860	92965130	123041	1.5e-05	+	92964860	92965130	0	1	270,	0	-4.82	-3.59	4.63	1
chr5	138855112	138855798	340061	2.5e-08	-	138855112	138855798	0	1	686,	0	-7.61	-6.54	5.86	1
chr1	40562812	40562903	5538	0.0023	-	40562812	40562903	0	1	91,	0	-2.63	-1.69	1.36	1
chr1	85733190	85741990	8915	6.3e-25	-	85733190	85741990	0	3	475,289,12,	0,3110,8788	-24.2	-23.1	11.6	1
chr1	44087846	44088296	5792	4e-16	+	44087846	44088296	0	1	450,	0	-15.4	-14.4	4.65	1
chr16	87863688	87903100	8140	0	-	87863688	87903100	0	10	2943,178,150,97,104,124,45,106,126,610,	0,4331,6415,7762,8631,9619,10346,10967,21641,38802	-1790	#NAME?	1130	1
chr14	21960996	21961207	9878	1.4e-06	+	21960996	21961207	0	1	211,	0	-5.84	-4.58	1.83	1
chr3	88205172	88206069	285237	2.5e-54	+	88205172	88206069	0	1	897,	0	-53.6	-51.3	5.64	1
chr6	44392266	44394263	988	0.00012	+	44392266	44394263	0	3	54,81,45,	0,1573,1952	-3.91	-2.78	4.08	1
chr6	28357759	28359467	9753	1e-140	-	28357759	28359467	0	1	1708,	0	-140	-138	14.6	1
chr19	36277440	36277681	115703	5e-22	+	36277440	36277681	0	1	241,	0	-21.3	-20.1	9.47	1
chr2	112973616	112988496	84524	4e-35	-	112973616	112988496	0	2	429,17,	0,14863	-34.4	-33.2	5.07	1
chr7	30066088	30066327	55033	1e-08	-	30066088	30066327	0	1	239,	0	-8	-7.14	8.11	1
chr7	6502557	6502797	11014	2.5e-12	-	6502557	6502797	0	1	240,	0	-11.6	-10.5	2.73	1
chr16	2317532	2317830	10921	0.00034	-	2317532	2317830	0	2	72,167,	0,131	-3.47	-2.3	2.54	1
chr19	1597657	1598073	10975	1e-123	-	1597657	1598073	0	1	416,	0	-123	-121	9.1	1
chr1	229773627	229773986	9816	6.3e-68	+	229773627	229773986	0	1	359,	0	-67.2	-65.8	5.41	1
chr20	32236037	32236218	9139	3.8e-08	+	32236037	32236218	0	1	181,	0	-7.42	-6.52	4.01	1
chr1	11714350	11714709	26232	2.5e-19	-	11714350	11714709	0	1	359,	0	-18.6	-17.3	10.2	1
chr19	53452751	53453890	125893	3.5e-10	-	53452751	53453890	0	1	1139,	0	-9.46	-8.58	13.9	1
chr8	55059977	55060481	29088	1e-204	+	55059977	55060481	0	1	504,	0	-204	-202	5.36	1
chr14	75513164	75513434	27030	1e-05	-	75513164	75513434	0	1	270,	0	-5	-3.72	6.36	1
chr16	56642477	56672626	4489	1e-166	+	56642477	56672626	0	3	118,66,49,	0,426,30100	-166	-162	1.65	1
chr21	46951396	46951726	6573	1.5e-06	-	46951396	46951726	0	1	330,	0	-5.81	-4.94	16.1	1
chr2	232037299	232037480	5707	2.8e-08	+	232037299	232037480	0	1	181,	0	-7.56	-6.68	3.41	1
chr6	88299844	88304094	23595	0.00034	+	88299844	88304094	0	2	66,24,	0,4226	-3.47	-2.74	2.18	1
chr15	55700348	55700588	9236	8.7e-08	-	55700348	55700588	0	1	240,	0	-7.06	-6.01	9.11	1
chr17	30325699	30326177	23512	6.3e-40	+	30325699	30326177	0	1	478,	0	-39.2	-37.8	9.57	1
chr19	49588673	49588882	6625	1.3e-05	+	49588673	49588882	0	1	209,	0	-4.89	-3.75	1.51	1
chr1	59247390	59248049	3725	3.2e-81	-	59247390	59248049	0	1	659,	0	-80.5	-77.1	3.34	1
chr16	88763289	88764005	115992	6.3e-33	-	88763289	88764005	0	1	716,	0	-32.2	-31	4.37	1
chr14	105411323	105411564	113146	1.9e-09	-	105411323	105411564	0	1	241,	0	-8.73	-7.73	13.8	1
chr4	87683982	87685775	5783	3.2e-67	+	87683982	87685775	0	2	361,30,	0,1763	-66.5	-65	8.86	1
chr14	36986320	36986709	7080	1.3e-18	-	36986320	36986709	0	1	389,	0	-17.9	-16.7	8.67	1
chr5	127522323	127522473	6558	0.00036	+	127522323	127522473	0	1	150,	0	-3.44	-2.61	10.7	1
chr18	34804568	34805018	57536	7.9e-19	+	34804568	34805018	0	1	450,	0	-18.1	-17	8.76	1
chr15	66994673	66996341	4091	1.000000e-310	+	66994673	66996341	0	1	1668,	0	-310	-308	39	1
chr8	105509239	105511708	29967	7.9e-51	-	105509239	105511708	0	2	1065,164,	0,2305	-50.1	-48.7	121	1
chr3	133306667	133307624	55573	0	+	133306667	133307624	0	1	957,	0	-567	#NAME?	13.7	1
chr1	183105564	183106887	3915	7.9e-08	+	183105564	183106887	0	2	156,84,	0,1239	-7.1	-5.65	1.45	1
chr4	8472811	8475336	152992	0.0003	+	8472811	8475336	0	2	116,94,	0,2431	-3.53	-2.64	15.1	1
chr17	3909206	3911574	23140	5e-27	-	3909206	3911574	0	2	1058,21,	0,2347	-26.3	-25.1	6.12	1
chr2	44588521	44588731	9581	2e-07	-	44588521	44588731	0	1	210,	0	-6.7	-5.66	17.6	1
chr4	140586921	140587129	4258	8.9e-06	+	140586921	140587129	0	1	208,	0	-5.05	-4.1	8.46	1
chr4	113198839	113206910	92610	3.2e-43	-	113198839	113206910	0	2	751,115,	0,7956	-42.5	-41.2	74.9	1
chr12	53837351	53845890	5094	0.00012	+	53837351	53845890	0	2	206,5,	0,8534	-3.91	-2.85	1.25	1
chrX	148627196	148628500	91966	3.2e-44	+	148627196	148628500	0	2	233,216,	0,1088	-43.5	-42.2	7.83	1
chr2	67630570	67631377	54465	5.1e-10	+	67630570	67631377	0	1	807,	0	-9.29	-8.37	16.7	1
chr7	73535477	73535807	3984	3.1e-09	+	73535477	73535807	0	1	330,	0	-8.51	-7.32	1.47	1
chr10	21783420	21783569	399726	7.9e-07	-	21783420	21783569	0	1	149,	0	-6.1	-5.29	10.9	1
chr1	21544217	21545325	1889	2.5e-22	-	21544217	21545325	0	1	1108,	0	-21.6	-19.9	2.97	1
chr4	15687894	15688223	285550	4.6e-10	+	15687894	15688223	0	1	329,	0	-9.34	-8.46	3.16	1
chr2	187351180	187364981	55854	6.9e-06	+	187351180	187364981	0	3	4,102,73,	0,8779,13728	-5.16	-3.9	4.19	1
chr19	34960111	34960321	10054	1.6e-37	+	34960111	34960321	0	1	210,	0	-36.8	-35.6	1.85	1
chr22	24036540	24037189	266747	0.00059	+	24036540	24037189	0	2	97,53,	0,596	-3.23	-2.31	12.2	1
chr16	15680900	15681168	89927	2e-06	+	15680900	15681168	0	1	268,	0	-5.69	-4.35	2.61	1
chr19	57909878	57910807	147694	4e-69	+	57909878	57910807	0	1	929,	0	-68.4	-66.9	15.6	1
chr19	603575	603815	610	5e-24	+	603575	603815	0	1	240,	0	-23.3	-22.1	17	1
chr15	84868677	84869217	388152	1.6e-16	-	84868677	84869217	0	1	540,	0	-15.8	-14.4	4.09	1
chr17	42264628	42264896	79089	1e-22	+	42264628	42264896	0	1	268,	0	-22	-20.9	6.89	1
chr14	102689170	102689411	91833	2e-17	+	102689170	102689411	0	1	241,	0	-16.7	-15.6	11	1
chr14	73569922	73572723	58517	5e-19	+	73569922	73572723	0	2	264,157,	0,2644	-18.3	-16.5	1.9	1
chr19	42881693	42881843	1954	2.8e-05	+	42881693	42881843	0	1	150,	0	-4.55	-3.35	4.84	1
chr3	120499894	120500192	2960	5.6e-08	+	120499894	120500192	0	1	298,	0	-7.25	-5.93	2.7	1
chr8	101315471	101322229	25897	0.00071	-	101315471	101322229	0	2	16,135,	0,6623	-3.15	-2.44	3.23	1
chr1	78098953	78105207	26009	1.2e-05	-	78098953	78105207	0	2	137,74,	0,6180	-4.93	-4.13	4.46	1
chr12	32832166	32832346	10059	1.4e-07	+	32832166	32832346	0	1	180,	0	-6.86	-5.81	7.81	1
chr21	46709282	46710585	642852	1e-208	+	46709282	46710585	0	2	71,200,	0,1103	-208	-206	37.7	1
chr20	62590658	62590958	57473	7.9e-05	-	62590658	62590958	0	1	300,	0	-4.1	-3.38	8.7	1
chr6	108882593	108882803	2309	7.2e-08	+	108882593	108882803	0	1	210,	0	-7.14	-6.15	27.8	1
chr11	82692537	82698194	27314	1e-247	-	82692537	82698194	0	2	920,129,	0,5528	-247	-245	69.7	1
chr5	140052201	140052893	373863	5e-16	-	140052201	140052893	0	2	290,38,	0,654	-15.3	-14.2	3.8	1
chr5	140232447	140232807	9752	4.5e-09	+	140232447	140232807	0	1	360,	0	-8.35	-6.82	9.69	1
chr1	1262735	1264276	80772	1e-152	+	1262735	1264276	0	1	1541,	0	-152	-150	16.9	1
chr6	135358361	135359051	10767	1.6e-29	-	135358361	135359051	0	1	690,	0	-28.8	-27.7	5.7	1
chr20	34090315	34099205	11190	2e-24	+	34090315	34099205	0	6	2518,114,156,102,57,14,	0,5251,5548,6456,7511,8876	-23.7	-22	4.7	1
chr7	104782469	104783691	6733	1.3e-39	-	104782469	104783691	0	2	468,161,	0,1061	-38.9	-36.9	4.61	1
chr8	95541319	95541440	25962	0.00044	-	95541319	95541440	0	1	121,	0	-3.36	-2.2	1.77	1
chr20	42825207	42839426	51526	3.2e-35	-	42825207	42839426	0	4	1172,114,118,91,	0,6393,10313,14128	-34.5	-33.2	21.9	1
chr8	59496569	59496659	8439	6.3e-05	-	59496569	59496659	0	1	90,	0	-4.2	-3.45	2.76	1
chr6	57054988	57055349	51715	1.2e-06	-	57054988	57055349	0	1	361,	0	-5.93	-4.71	2.73	1
chr19	48947139	48947439	2906	3.2e-24	+	48947139	48947439	0	1	300,	0	-23.5	-22.4	71.4	1
chr21	30714834	30715134	571	4e-11	+	30714834	30715134	0	1	300,	0	-10.4	-9.28	34.8	1
chr10	126370187	126384746	9679	4e-51	-	126370187	126384746	0	2	761,20,	0,14539	-50.4	-49.1	9.6	1
chr6	41566654	41567223	116113	1.1e-07	+	41566654	41567223	0	1	569,	0	-6.94	-5.66	1.83	1
chr7	138874161	138874550	79989	2e-86	+	138874161	138874550	0	1	389,	0	-85.7	-84.1	10.8	1
chr14	77493456	77493577	64207	8.3e-05	-	77493456	77493577	0	1	121,	0	-4.08	-2.97	2.52	1
chr9	140002771	140003639	11253	2.5e-97	+	140002771	140003639	0	1	868,	0	-96.6	-94.9	11.4	1
chr3	30732964	30733295	7048	6.9e-05	+	30732964	30733295	0	1	331,	0	-4.16	-3.28	2.99	1
chr17	40818633	40818784	27175	0.00065	+	40818633	40818784	0	1	151,	0	-3.19	-2.37	2.44	1
chr10	115884732	115885752	55088	5e-30	-	115884732	115885752	0	2	253,108,	0,912	-29.3	-28.1	8.19	1
chr15	32928482	32929711	9824	5e-20	+	32928482	32929711	0	1	1229,	0	-19.3	-17.5	3.99	1
chr1	236712383	236712743	3964	7.9e-56	+	236712383	236712743	0	1	360,	0	-55.1	-53.7	6.45	1
chr2	73172013	73172104	94097	0.0038	-	73172013	73172104	0	1	91,	0	-2.42	-1.74	2.75	1
chr20	35412237	35422237	140710	1e-258	-	35412237	35422237	0	2	2803,586,	0,9414	-258	-256	51.2	1
chr1	23410605	23410906	7798	2e-16	-	23410605	23410906	0	1	301,	0	-15.7	-14.8	7.5	1
chr19	16686289	16688356	9441	1e-215	-	16686289	16688356	0	1	2067,	0	-215	-213	32.6	1
chr15	80189216	80189537	10588	7.9e-11	-	80189216	80189537	0	2	175,35,	0,286	-10.1	-8.97	18.5	1
chr22	31478894	31481086	6525	2.9e-09	+	31478894	31481086	0	3	94,131,105,	0,270,2087	-8.54	-6.91	2.23	1
chr5	158584476	158590052	153830	0	-	158584476	158590052	0	3	1567,357,113,	0,3797,5463	-749	#NAME?	57.8	1
chr1	12071593	12072823	9927	4e-50	+	12071593	12072823	0	1	1230,	0	-49.4	-47.2	3.57	1
chr17	78183108	78185529	6448	1.000000e-314	-	78183108	78185529	0	1	2421,	0	-314	-311	35.4	1
chr18	72997421	72997721	10194	7.9e-21	+	72997421	72997721	0	1	300,	0	-20.1	-19	15.1	1
chr11	562392	562661	8045	6.3e-20	+	562392	562661	0	1	269,	0	-19.2	-18	6.06	1
chr19	8468340	8469110	9230	1.6e-23	+	8468340	8469110	0	1	770,	0	-22.8	-21.1	2.24	1
chr7	99144130	99144608	221786	1e-35	-	99144130	99144608	0	1	478,	0	-35	-33.8	8.91	1
chr14	92466441	92469932	9321	5e-12	-	92466441	92469932	0	2	11,170,	0,3321	-11.3	-10.2	3.7	1
chr15	85326888	85327428	9640	1.3e-13	+	85326888	85327428	0	1	540,	0	-12.9	-12	7.51	1
chr6	101846937	101847147	2898	1.1e-07	+	101846937	101847147	0	1	210,	0	-6.94	-6.07	6.29	1
chrX	149638112	149638441	10046	1.3e-13	+	149638112	149638441	0	1	329,	0	-12.9	-12	9.86	1
chr19	11488478	11489256	2057	1.3e-49	-	11488478	11489256	0	1	778,	0	-48.9	-47.3	19.3	1
chr1	180241035	180241797	100527964	3.2e-05	-	180241035	180241797	0	2	71,50,	0,712	-4.5	-3.71	2.8	1
chr19	49621653	49622367	55150	7.9e-45	-	49621653	49622367	0	1	714,	0	-44.1	-42.8	12.6	1
chr22	45574144	45574653	10762	3.2e-31	+	45574144	45574653	0	1	509,	0	-30.5	-27.9	2.93	1
chr13	20425597	20426286	9205	7.9e-21	-	20425597	20426286	0	1	689,	0	-20.1	-19	6.16	1
chr3	155545860	155546131	9197	1.3e-53	-	155545860	155546131	0	1	271,	0	-52.9	-51.5	6.93	1
chr6	44226139	44226852	4794	6.3e-27	-	44226139	44226852	0	1	713,	0	-26.2	-24.2	3.7	1
chr22	24981650	24982368	388886	2e-20	-	24981650	24982368	0	1	718,	0	-19.7	-18.5	13.9	1
chr7	135358962	135359203	647087	5e-12	+	135358962	135359203	0	1	241,	0	-11.3	-10.4	2.35	1
chr1	228336389	228336567	2987	0.0017	+	228336389	228336567	0	1	178,	0	-2.76	-2.18	3.15	1
chr19	55992663	55993171	89887	7.9e-44	+	55992663	55993171	0	1	508,	0	-43.1	-41.4	10.4	1
chr1	227174646	227174706	56997	0.0011	+	227174646	227174706	0	1	60,	0	-2.95	-2.24	2.92	1
chr17	17069500	17070251	23164	3.2e-13	+	17069500	17070251	0	1	751,	0	-12.5	-11.5	10.7	1
chr2	102793518	102793729	3554	0.00012	+	102793518	102793729	0	1	211,	0	-3.91	-2.78	14.3	1
chr4	100821987	100825040	79982	7.9e-48	-	100821987	100825040	0	2	322,158,	0,2895	-47.1	-45.8	6.01	1
chr17	72834454	72834725	54868	3.3e-07	+	72834454	72834725	0	1	271,	0	-6.48	-5.22	2.51	1
chr3	49756138	49757119	386724	7.2e-10	-	49756138	49757119	0	1	981,	0	-9.14	-7.72	3.08	1
chr11	108029495	108032553	4863	4e-33	-	108029495	108032553	0	2	251,947,	0,2111	-32.4	-31.2	6.49	1
chr14	93754743	93754924	55727	1e-07	-	93754743	93754924	0	1	181,	0	-7	-6.11	3.1	1
chr1	46500360	46501736	23139	1.3e-19	+	46500360	46501736	0	1	1376,	0	-18.9	-17.3	3.08	1
chr6	42151827	42152097	2979	2.1e-08	-	42151827	42152097	0	1	270,	0	-7.67	-6.19	15.2	1
chr14	21853352	21853981	57680	5e-69	-	21853352	21853981	0	1	629,	0	-68.3	-66.8	17.9	1
chr5	159519260	159520995	114825	1e-99	-	159519260	159520995	0	1	1735,	0	-99	-97.3	46.5	1
chr16	4932597	4933228	5493	1.9e-10	-	4932597	4933228	0	1	631,	0	-9.72	-8.46	11.7	1
chr2	203419994	203421193	659	1e-113	+	203419994	203421193	0	1	1199,	0	-113	-111	12.3	1
chr1	233393774	233395033	80003	1e-105	-	233393774	233395033	0	1	1259,	0	-105	-104	16	1
chr10	118432229	118433218	259217	5e-32	-	118432229	118433218	0	1	989,	0	-31.3	-30.1	55.3	1
chr20	61576118	61576657	54994	1e-134	+	61576118	61576657	0	1	539,	0	-134	-132	19.1	1
chr22	37415249	37415457	7263	3.9e-05	-	37415249	37415457	0	1	208,	0	-4.41	-3.45	7.53	1
chr19	12691761	12692479	57474	1.6e-17	-	12691761	12692479	0	1	718,	0	-16.8	-15.8	7.3	1
chr3	128631477	128631867	28976	1e-108	+	128631477	128631867	0	1	390,	0	-108	-106	6.89	1
chr5	58269605	58285699	5144	0	-	58269605	58285699	0	6	1302,183,123,155,100,118,	0,1878,2571,3412,14714,15976	-648	#NAME?	64.2	1
chr18	60244176	60244746	54877	5.6e-06	+	60244176	60244746	0	1	570,	0	-5.25	-4.44	11.3	1
chr17	42254410	42254738	339201	1.3e-09	-	42254410	42254738	0	1	328,	0	-8.9	-7.78	4.62	1
chr13	37393606	37402016	5994	1.6e-77	+	37393606	37402016	0	3	488,108,237,	0,5958,8173	-76.8	-75.2	8.5	1
chr14	31916849	31917059	112487	6.3e-08	-	31916849	31917059	0	1	210,	0	-7.2	-5.75	7.38	1
chr19	54081368	54081608	55422	2.5e-19	+	54081368	54081608	0	1	240,	0	-18.6	-17.3	8.55	1
chr2	48573366	48573785	3344	5.8e-08	+	48573366	48573785	0	1	419,	0	-7.24	-5.92	2.95	1
chr2	242512452	242513553	666	7.9e-24	+	242512452	242513553	0	1	1101,	0	-23.1	-21.8	18.2	1
chr10	71899023	71899892	219743	2e-45	-	71899023	71899892	0	1	869,	0	-44.7	-43.4	7.76	1
chr11	6640453	6640632	1200	0.00014	-	6640453	6640632	0	2	132,18,	0,161	-3.85	-2.98	4.88	1
chr16	89167096	89167456	197322	1.6e-05	+	89167096	89167456	0	1	360,	0	-4.79	-4.01	17.4	1
chr12	121880002	121880481	84678	4e-09	-	121880002	121880481	0	1	479,	0	-8.4	-7.01	2.52	1
chr1	227921490	227921847	100130093	2.5e-13	+	227921490	227921847	0	1	357,	0	-12.6	-11.5	8.07	1
chr2	218712372	218712493	7145	0.00051	-	218712372	218712493	0	1	121,	0	-3.29	-2.26	2.02	1
chr8	125498173	125499159	11236	2e-63	+	125498173	125499159	0	1	986,	0	-62.7	-60.3	4.92	1
chr19	21908759	21926883	163227	2.5e-80	-	21908759	21926883	0	2	2032,65,	0,18059	-79.6	-78	22.6	1
chr6	43491535	43491716	57510	1.2e-05	-	43491535	43491716	0	1	181,	0	-4.93	-3.98	3.16	1
chr6	143094672	143095182	3097	6.3e-07	-	143094672	143095182	0	1	510,	0	-6.2	-5.39	5.14	1
chr16	57272797	57272947	89970	4e-15	+	57272797	57272947	0	1	150,	0	-14.4	-13.4	4.72	1
chr1	159894283	159895302	8407	0.0047	-	159894283	159895302	0	2	58,63,	0,956	-2.33	-1.81	9.37	1
chr17	66265053	66270157	9120	1e-287	-	66265053	66270157	0	4	434,816,129,90,	0,1926,3726,5014	-287	-285	25.1	1
chr1	40703843	40706294	6018	1e-256	+	40703843	40706294	0	1	2451,	0	-256	-253	13.8	1
chr4	2942310	2942640	317648	2.5e-33	+	2942310	2942640	0	1	330,	0	-32.6	-31.3	49.7	1
chr22	42455767	42456305	4668	2.5e-23	-	42455767	42456305	0	1	538,	0	-22.6	-21.5	13.8	1
chr16	72818795	72819126	463	0.00079	-	72818795	72819126	0	1	331,	0	-3.1	-2.39	4.28	1
chr10	81444225	81445033	650623	2e-38	+	81444225	81445033	0	1	808,	0	-37.7	-36.4	10.5	1
chr2	136499307	136499577	23190	2.5e-05	+	136499307	136499577	0	1	270,	0	-4.6	-3.83	12.7	1
chr7	43992950	43993251	51619	1.1e-09	+	43992950	43993251	0	1	301,	0	-8.96	-8.09	7.91	1
chr4	170017350	170028078	57630	3.2e-71	-	170017350	170028078	0	2	488,81,	0,10647	-70.5	-68.9	18.9	1
chr18	18691062	18691812	6093	1e-18	-	18691062	18691812	0	1	750,	0	-18	-16.7	8.78	1
chr19	49000847	49001807	114783	1e-167	-	49000847	49001807	0	1	960,	0	-167	-165	480	1
chr3	128060269	128060719	60678	7.9e-30	+	128060269	128060719	0	1	450,	0	-29.1	-27.8	10.5	1
chr1	206636854	206637364	23380	7.4e-08	+	206636854	206637364	0	1	510,	0	-7.13	-6	3.23	1
chr2	232319697	232320159	4691	1e-227	-	232319697	232320159	0	2	281,48,	0,414	-227	-225	3.64	1
chr11	61583787	61583877	9415	0.0027	+	61583787	61583877	0	1	90,	0	-2.57	-1.8	2.34	1
chr6	25983990	25984560	10475	4e-12	+	25983990	25984560	0	1	570,	0	-11.4	-10.5	18.3	1
chr12	106460295	106464639	9891	2.5e-50	-	106460295	106464639	0	2	1438,88,	0,4256	-49.6	-47.4	4.12	1
chr2	118676943	118688632	54520	1e-82	-	118676943	118688632	0	2	1029,20,	0,11669	-82	-80.4	9.84	1
chr2	208866522	208890284	389072	3.6e-07	-	208866522	208890284	0	2	159,172,	0,23590	-6.44	-5.59	5.95	1
chr8	126011197	126017851	6713	1e-209	+	126011197	126017851	0	3	739,253,85,	0,4220,6569	-209	-206	47.5	1
chr11	66613767	66613915	9986	1.9e-05	+	66613767	66613915	0	1	148,	0	-4.73	-3.8	4.07	1
chr12	27950762	27951092	57542	7.8e-10	+	27950762	27951092	0	1	330,	0	-9.11	-7.7	2.3	1
chr4	77955725	77956205	55752	1e-45	+	77955725	77956205	0	1	480,	0	-45	-43.7	11.9	1
chr6	56472269	56472509	667	4.6e-08	-	56472269	56472509	0	1	240,	0	-7.34	-6.5	5.23	1
chr11	61197312	61197464	79869	7.2e-08	-	61197312	61197464	0	2	71,79,	0,73	-7.14	-6.09	29.3	1
chr7	128394352	128394635	813	5.5e-06	+	128394352	128394635	0	2	157,53,	0,230	-5.26	-3.95	1.39	1
chr7	5427402	5428932	84629	0	-	5427402	5428932	0	1	1530,	0	-1210	#NAME?	53.5	1
chr19	6440080	6440410	79085	9.1e-08	-	6440080	6440410	0	1	330,	0	-7.04	-5.92	2.15	1
chr6	32120637	32120904	100507547	2e-18	-	32120637	32120904	0	1	267,	0	-17.7	-16.7	6.1	1
chr20	1145946	1146514	9491	3.2e-11	+	1145946	1146514	0	1	568,	0	-10.5	-9.6	6.11	1
chr1	43916673	43917101	81888	2e-06	-	43916673	43917101	0	2	309,21,	0,407	-5.7	-4.65	5.38	1
chr6	150147131	150147371	84918	7.6e-10	-	150147131	150147371	0	1	240,	0	-9.12	-8.25	7.32	1
chr6	30593407	30593643	28973	1.3e-24	+	30593407	30593643	0	1	236,	0	-23.9	-22.8	1.91	1
chr9	133967070	133967400	10319	2.2e-08	+	133967070	133967400	0	1	330,	0	-7.65	-6.5	3.48	1
chr2	128262340	128281314	55677	1e-40	-	128262340	128281314	0	2	988,63,	0,18911	-40	-38.7	9.67	1
chr6	53363335	53363695	2729	7.9e-52	-	53363335	53363695	0	1	360,	0	-51.1	-49.8	10	1
chr19	58967705	58968811	388569	1e-82	+	58967705	58968811	0	1	1106,	0	-82	-80.5	25.8	1
chr10	32197189	32197848	94134	2.5e-29	-	32197189	32197848	0	1	659,	0	-28.6	-26.8	5.2	1
chr13	103527662	103528321	100533467	5e-46	+	103527662	103528321	0	1	659,	0	-45.3	-43.9	6.75	1
chr22	22055265	22057687	29799	3.2e-24	-	22055265	22057687	0	2	242,29,	0,2393	-23.5	-22.4	10.1	1
chr5	74077132	74078772	26049	1e-252	-	74077132	74078772	0	2	701,17,	0,1623	-252	-250	10.9	1
chr5	39383126	39383277	1601	0.00011	-	39383126	39383277	0	1	151,	0	-3.95	-2.77	1.92	1
chr8	38846833	38847013	83877	1.2e-06	-	38846833	38847013	0	1	180,	0	-5.91	-4.57	3.63	1
chr6	119136890	119136980	254394	0.0021	-	119136890	119136980	0	1	90,	0	-2.68	-1.75	11	1
chr20	60709715	60710045	149986	1.2e-05	+	60709715	60710045	0	1	330,	0	-4.93	-3.93	1.96	1
chr19	39340391	39342979	3191	7.9e-60	-	39340391	39342979	0	2	226,44,	0,2544	-59.1	-57.3	7.13	1
chr1	93811507	93812317	1810	1.6e-18	+	93811507	93812317	0	1	810,	0	-17.8	-16.5	30.8	1
chr20	19955417	19955836	54453	4.5e-08	+	19955417	19955836	0	1	419,	0	-7.35	-6.51	22.5	1
chr16	2692481	2693020	645644	8.3e-05	+	2692481	2693020	0	1	539,	0	-4.08	-3	4.24	1
chr2	185801289	185802424	91752	1.4e-10	+	185801289	185802424	0	1	1135,	0	-9.84	-8.95	29.3	1
chr1	2518236	2518575	127281	7.8e-08	+	2518236	2518575	0	2	151,59,	0,280	-7.11	-5.82	3.25	1
chrX	71792503	71792713	55869	1.6e-06	-	71792503	71792713	0	1	210,	0	-5.79	-4.57	3.08	1
chr16	3169294	3169951	7755	3.2e-59	+	3169294	3169951	0	1	657,	0	-58.5	-56.9	7.28	1
chr14	75514808	75515019	27030	0.00043	-	75514808	75515019	0	1	211,	0	-3.37	-2.65	8.89	1
chr10	115614539	115614720	374354	6e-05	+	115614539	115614720	0	1	181,	0	-4.22	-2.96	2	1
chr19	58978411	58980587	25799	6.3e-15	+	58978411	58980587	0	2	139,41,	0,2135	-14.2	-13.1	44.3	1
chr1	208200376	208200616	5362	4e-25	-	208200376	208200616	0	1	240,	0	-24.4	-23.2	27.2	1
chr12	3919461	3919941	57097	2.8e-10	-	3919461	3919941	0	1	480,	0	-9.56	-7.96	5.06	1
chr4	40440453	40440753	54502	6.3e-33	-	40440453	40440753	0	1	300,	0	-32.2	-30.8	10.4	1
chr6	39077834	39078105	55776	4.2e-05	-	39077834	39078105	0	1	271,	0	-4.38	-3.43	6.46	1
chr12	8928013	8928283	57494	1.6e-48	+	8928013	8928283	0	1	270,	0	-47.8	-46.5	5.93	1
chr17	36478472	36479101	84311	1e-110	+	36478472	36479101	0	1	629,	0	-110	-108	5.3	1
chr3	194362171	194365360	55341	1e-42	-	194362171	194365360	0	2	805,59,	0,3130	-42	-39.9	3.81	1
chr7	19737478	19739751	221830	1e-226	-	19737478	19739751	0	2	872,57,	0,2216	-226	-223	11.2	1
chr5	179263909	179264778	8878	4e-45	+	179263909	179264778	0	1	869,	0	-44.4	-42.6	7.92	1
chr5	95297355	95297536	22936	1.4e-06	-	95297355	95297536	0	1	181,	0	-5.85	-4.98	8.7	1
chr3	143704385	143704655	205428	2.5e-06	+	143704385	143704655	0	1	270,	0	-5.6	-4.4	2.35	1
chr2	58386518	58386847	7444	5e-52	+	58386518	58386847	0	1	329,	0	-51.3	-49.9	13.2	1
chr12	551030	551240	84318	1.8e-06	+	551030	551240	0	1	210,	0	-5.74	-4.53	2.61	1
chr16	70193656	70195004	55066	3.2e-80	+	70193656	70195004	0	1	1348,	0	-79.5	-77.9	50.3	1
chr2	237994471	237994682	10920	3.2e-14	+	237994471	237994682	0	1	211,	0	-13.5	-12.3	12.5	1
chr1	156692948	156693247	81875	4e-24	-	156692948	156693247	0	1	299,	0	-23.4	-21.5	2.66	1
chr14	94545561	94547498	57062	2e-10	-	94545561	94547498	0	2	532,34,	0,1903	-9.7	-8.18	2.73	1
chr14	24658447	24658898	79711	1.8e-07	-	24658447	24658898	0	1	451,	0	-6.75	-5.89	19	1
chr8	110356122	110356842	56943	3.2e-20	+	110356122	110356842	0	1	720,	0	-19.5	-18.4	34.5	1
chr17	48944098	48944452	400604	7.6e-06	+	48944098	48944452	0	1	354,	0	-5.12	-4.34	3.71	1
chr4	170926757	170926967	9848	8.7e-06	-	170926757	170926967	0	1	210,	0	-5.06	-4.22	4.57	1
chr5	149403909	149404000	22993	0.0002	+	149403909	149404000	0	1	91,	0	-3.69	-2.84	2.9	1
chr16	4559718	4559929	3163	4.9e-09	+	4559718	4559929	0	1	211,	0	-8.31	-7.21	4.71	1
chr11	88059277	88061335	1075	1.3e-47	-	88059277	88061335	0	2	334,56,	0,2002	-46.9	-45.6	12.3	1
chr19	58805557	58807234	7554	2e-66	+	58805557	58807234	0	1	1677,	0	-65.7	-64.2	14.1	1
chr17	35872390	35872989	11072	1e-101	+	35872390	35872989	0	1	599,	0	-101	-99.4	7.87	1
chr6	149395706	149395916	10090	2.1e-06	+	149395706	149395916	0	1	210,	0	-5.68	-4.36	5.42	1
chr3	119884627	119885646	165829	1.7e-08	-	119884627	119885646	0	1	1019,	0	-7.78	-6.62	5.38	1
chr15	66161796	66161946	8766	7.9e-13	+	66161796	66161946	0	1	150,	0	-12.1	-11	4.96	1
chr19	1986044	1986434	55643	3.9e-09	-	1986044	1986434	0	1	390,	0	-8.41	-7.41	28.8	1
chr17	40353289	40353470	6777	1.4e-09	-	40353289	40353470	0	1	181,	0	-8.84	-7.91	2.75	1
chr10	90640093	90640244	57559	5.5e-05	+	90640093	90640244	0	1	151,	0	-4.26	-3	2.03	1
chr22	21356715	21357220	439931	4.1e-07	+	21356715	21357220	0	2	403,14,	0,491	-6.39	-5.3	6.89	1
chr14	93669853	93673371	84520	1.6e-29	-	93669853	93673371	0	2	274,197,	0,3321	-28.8	-27.7	4.11	1
chr3	105085556	105086306	214	7.9e-39	+	105085556	105086306	0	1	750,	0	-38.1	-36	3.19	1
chr11	65339001	65339180	10534	0.0012	+	65339001	65339180	0	1	179,	0	-2.93	-2.33	11.4	1
chr8	38120709	38121190	84513	1.3e-69	-	38120709	38121190	0	1	481,	0	-68.9	-67.4	133	1
chr19	6212598	6222301	4298	2.5e-06	-	6212598	6222301	0	7	583,72,72,100,109,88,170,	0,749,1138,1351,3817,5366,9533	-5.6	-4.75	19.4	1
chr3	126170259	126171250	79364	1.6e-36	-	126170259	126171250	0	1	991,	0	-35.8	-34.6	15	1
chr17	33339020	33343420	100529207	2.1e-05	-	33339020	33343420	0	2	148,32,	0,4368	-4.67	-3.54	2.23	1
chr8	91637714	91657404	169200	3.2e-24	-	91637714	91657404	0	3	376,156,66,	0,6065,19624	-23.5	-22.4	12.1	1
chr5	178138699	178139651	6940	4e-27	-	178138699	178139651	0	1	952,	0	-26.4	-25.2	6.5	1
chr2	233445653	233446073	9470	1e-23	+	233445653	233446073	0	1	420,	0	-23	-21.8	28.2	1
chr5	137275563	137275922	27039	7.9e-18	+	137275563	137275922	0	1	359,	0	-17.1	-16.1	15.5	1
chr1	37941067	37941367	80149	3.2e-17	+	37941067	37941367	0	1	300,	0	-16.5	-15.3	8.65	1
chr18	54423830	54424520	23335	2e-12	+	54423830	54424520	0	1	690,	0	-11.7	-10.8	17.4	1
chr18	72775384	72775804	55628	2.2e-10	+	72775384	72775804	0	1	420,	0	-9.66	-8.6	7.08	1
chr12	57005856	57005977	11176	0.00022	-	57005856	57005977	0	1	121,	0	-3.65	-2.5	1.57	1
chr19	7964661	7965261	80131	2.3e-06	+	7964661	7965261	0	1	600,	0	-5.64	-4.81	13.1	1
chr3	49027819	49027910	54681	0.0074	+	49027819	49027910	0	1	91,	0	-2.13	-1.64	8.7	1
chr1	25893355	25894366	26119	5e-39	+	25893355	25894366	0	1	1011,	0	-38.3	-36.7	14.2	1
chr6	34725200	34725668	6631	3.2e-25	+	34725200	34725668	0	2	128,53,	0,415	-24.5	-23	8.78	1
chr17	2240348	2240648	55720	3.2e-32	-	2240348	2240648	0	1	300,	0	-31.5	-30.3	29.4	1
chr1	205585283	205588508	2005	7.9e-85	-	205585283	205588508	0	3	489,117,113,	0,2801,3112	-84.1	-82.5	29.1	1
chr6	32136730	32136910	10554	3e-05	-	32136730	32136910	0	1	180,	0	-4.52	-3.41	1.44	1
chr20	43384366	43384965	140730	2.9e-08	-	43384366	43384965	0	1	599,	0	-7.54	-6.39	3.07	1
chr2	153473674	153475597	114793	4e-14	+	153473674	153475597	0	2	32,238,	0,1685	-13.4	-12.4	4.74	1
chr19	10577617	10578276	5141	1.3e-15	+	10577617	10578276	0	1	659,	0	-14.9	-13.9	25.1	1
chr18	51820374	51821035	11201	1e-107	+	51820374	51821035	0	1	661,	0	-107	-105	16.2	1
chr2	43926852	43927721	130271	3.2e-34	+	43926852	43927721	0	1	869,	0	-33.5	-32.3	16.2	1
chr12	14613499	14613979	55729	2.5e-15	+	14613499	14613979	0	1	480,	0	-14.6	-13.1	3.9	1
chr1	203652186	203667305	493	4e-14	+	203652186	203667305	0	2	340,21,	0,15098	-13.4	-11.7	3.29	1
chr15	90903618	90903945	342132	7.9e-34	+	90903618	90903945	0	1	327,	0	-33.1	-31.9	22.9	1
chr2	219618882	219619212	9654	5e-29	+	219618882	219619212	0	1	330,	0	-28.3	-27.1	5.01	1
chr7	1580712	1581368	7975	3.2e-20	+	1580712	1581368	0	1	656,	0	-19.5	-17.6	3.89	1
chr17	19283983	19285543	5598	7.9e-28	+	19283983	19285543	0	2	1016,450,	0,1110	-27.1	-25.1	4.28	1
chr10	27323829	27326132	22852	1e-104	-	27323829	27326132	0	2	852,18,	0,2285	-104	-102	12.4	1
chr7	7678747	7680159	6119	1.3e-30	-	7678747	7680159	0	2	28,209,	0,1203	-29.9	-28.7	14.8	1
chr5	140603675	140603856	56122	4.3e-07	+	140603675	140603856	0	1	181,	0	-6.37	-5.41	14.2	1
chr7	808131	808581	54919	8.3e-05	+	808131	808581	0	1	450,	0	-4.08	-3	3.22	1
chrX	152989781	152989932	10134	6.9e-07	-	152989781	152989932	0	1	151,	0	-6.16	-5.15	29.3	1
chr1	114939920	114940460	51592	1.3e-35	-	114939920	114940460	0	1	540,	0	-34.9	-33.6	7.25	1
chr12	112622082	112622263	283450	0.00017	-	112622082	112622263	0	1	181,	0	-3.76	-3.06	13.4	1
chr17	79202465	79202855	146705	1e-22	-	79202465	79202855	0	1	390,	0	-22	-20.7	39.5	1
chr14	73740418	73741287	89932	2.5e-69	+	73740418	73741287	0	1	869,	0	-68.6	-67.1	40.4	1
chr14	80664676	80664797	1734	0.00052	-	80664676	80664797	0	1	121,	0	-3.28	-2.56	2.51	1
chr14	95625326	95646270	400242	2.5e-81	+	95625326	95646270	0	2	46,430,	0,20514	-80.6	-79.1	86.4	1
chr8	22874813	22876575	23221	1e-39	+	22874813	22876575	0	1	1762,	0	-39	-37.7	13.3	1
chr19	44118558	44118649	79177	2.2e-07	+	44118558	44118649	0	1	91,	0	-6.65	-5.61	4.72	1
chr17	702672	702822	64359	0.00016	-	702672	702822	0	1	150,	0	-3.8	-2.71	1.77	1
chr12	102158014	102159004	79158	5e-64	-	102158014	102159004	0	1	990,	0	-63.3	-61.9	12.5	1
chr14	35591409	35591619	55012	3e-06	-	35591409	35591619	0	1	210,	0	-5.52	-4.7	7.73	1
chr16	734701	735030	84219	1.6e-17	-	734701	735030	0	2	201,39,	0,290	-16.8	-15.7	27.8	1
chr21	47836001	47836751	5116	5e-44	+	47836001	47836751	0	1	750,	0	-43.3	-41.5	120	1
chr8	9634919	9635309	8658	3.2e-86	+	9634919	9635309	0	1	390,	0	-85.5	-83.9	5.96	1
chr1	117122144	117127166	3321	2.2e-06	-	117122144	117127166	0	2	355,6,	0,5016	-5.65	-4.4	2.15	1
chr12	132622631	132623826	317781	1.1e-08	-	132622631	132623826	0	1	1195,	0	-7.97	-6.38	3.62	1
chr1	33291722	33291782	64766	0.0012	+	33291722	33291782	0	1	60,	0	-2.92	-1.94	1.65	1
chr10	12870836	12871225	57118	1.4e-08	+	12870836	12871225	0	1	389,	0	-7.86	-6.69	4.64	1
chrX	21990037	21995191	6611	6.3e-06	+	21990037	21995191	0	3	71,65,13,	0,587,5141	-5.2	-3.98	1.36	1
chr8	28205700	28206328	55893	2.5e-24	-	28205700	28206328	0	1	628,	0	-23.6	-22.5	7.44	1
chr6	53659801	53659980	55227	1.6e-06	+	53659801	53659980	0	1	179,	0	-5.8	-4.84	19.7	1
chr8	145675374	145677771	50626	2e-13	-	145675374	145677771	0	2	779,30,	0,2367	-12.7	-11.5	22.7	1
chr4	140309068	140309397	80155	1.7e-05	+	140309068	140309397	0	1	329,	0	-4.76	-3.97	3.57	1
chr18	43534447	43547245	57724	1.3e-12	-	43534447	43547245	0	2	857,103,	0,12695	-11.9	-10.3	3.93	1
chr2	54856181	54856782	6711	1.3e-72	+	54856181	54856782	0	1	601,	0	-71.9	-70.5	4.39	1
chr11	36250774	36251015	143458	3.2e-20	+	36250774	36251015	0	1	241,	0	-19.5	-18.3	11.8	1
chr17	15340875	15343595	284040	7.9e-78	-	15340875	15343595	0	2	642,71,	0,2649	-77.1	-75.5	16.4	1
chr14	23540647	23547438	22985	1.3e-13	-	23540647	23547438	0	2	132,79,	0,6712	-12.9	-11.6	3.08	1
chr7	72855656	72857124	9031	1e-107	-	72855656	72857124	0	3	367,373,70,	0,854,1398	-107	-105	4.86	1
chr12	122260431	122263199	23067	7.9e-13	+	122260431	122263199	0	2	1224,94,	0,2674	-12.1	-10.7	5.38	1
chr12	44124142	44130215	83448	1e-119	-	44124142	44130215	0	3	363,54,32,	0,1365,6041	-119	-117	9.73	1
chr8	90802311	90802609	8767	2.5e-17	+	90802311	90802609	0	1	298,	0	-16.6	-15.1	17.6	1
chr1	222800972	222801123	375056	0.0013	+	222800972	222801123	0	1	151,	0	-2.88	-2.06	5.74	1
chr5	34823062	34826454	26064	1e-99	+	34823062	34826454	0	2	1534,20,	0,3372	-99	-97.4	10.8	1
chr1	11345705	11346245	29914	1.6e-27	+	11345705	11346245	0	1	540,	0	-26.8	-25	3.97	1
chr22	22311432	22311853	8940	3.2e-28	-	22311432	22311853	0	1	421,	0	-27.5	-26.3	5.47	1
chr17	27077377	27077557	9618	5.1e-06	+	27077377	27077557	0	1	180,	0	-5.29	-4.5	16.2	1
chr4	13602892	13603672	259282	4.8e-07	-	13602892	13603672	0	1	780,	0	-6.32	-5.24	5.02	1
chr6	12120239	12121888	3096	4e-63	+	12120239	12121888	0	1	1649,	0	-62.4	-60.9	32.1	1
chr5	114915537	114956357	100302736	2.5e-57	-	114915537	114956357	0	3	1475,128,226,	0,36477,40594	-56.6	-55.2	79.7	1
chr11	61584349	61584499	3992	1.1e-05	-	61584349	61584499	0	1	150,	0	-4.96	-4.01	3.9	1
chr8	41791007	41792146	7994	7.9e-45	-	41791007	41792146	0	1	1139,	0	-44.1	-42.8	10.9	1
chr11	46624855	46637916	283254	6.3e-33	-	46624855	46637916	0	2	604,799,	0,12262	-32.2	-31	11.8	1
chr20	17594322	17596652	6238	2.5e-22	-	17594322	17596652	0	4	543,144,99,82,	0,1059,1753,2248	-21.6	-20	2.74	1
chr16	90037321	90038011	92806	6.3e-48	-	90037321	90038011	0	1	690,	0	-47.2	-45.9	8.35	1
chr4	17625325	17625623	80306	1e-180	+	17625325	17625623	0	1	298,	0	-180	-178	6.52	1
chr12	46298791	46299092	196528	6.3e-17	+	46298791	46299092	0	1	301,	0	-16.2	-15.1	26.2	1
chr12	124421462	124421822	80212	1e-251	-	124421462	124421822	0	1	360,	0	-251	-249	325	1
chr1	52520672	52521453	51060	2e-40	-	52520672	52521453	0	1	781,	0	-39.7	-38.1	11.7	1
chr1	1167925	1170361	126792	1e-108	+	1167925	1170361	0	1	2436,	0	-108	-106	24.8	1
chr20	61521825	61522305	11083	2e-15	-	61521825	61522305	0	1	480,	0	-14.7	-13.8	5.63	1
chr12	32908142	32908470	51067	1.1e-06	-	32908142	32908470	0	1	328,	0	-5.96	-4.9	1.7	1
chr9	132642827	132642948	10868	0.00069	+	132642827	132642948	0	1	121,	0	-3.16	-2.38	2.5	1
chr4	157683507	157684342	56034	4e-84	-	157683507	157684342	0	1	835,	0	-83.4	-81.8	13.6	1
chr2	187373287	187373672	55854	1.3e-67	+	187373287	187373672	0	1	385,	0	-66.9	-65.4	4.17	1
chr22	44564605	44564785	29780	1.3e-07	+	44564605	44564785	0	1	180,	0	-6.9	-5.6	1.68	1
chr4	146479014	146479432	4086	7.9e-43	+	146479014	146479432	0	1	418,	0	-42.1	-40.8	10.7	1
chr2	224743055	224743295	57590	2e-19	-	224743055	224743295	0	1	240,	0	-18.7	-17.7	3.65	1
chr19	36223195	36223944	9757	2.5e-23	+	36223195	36223944	0	1	749,	0	-22.6	-21.2	60.2	1
chr11	128838519	128840677	9743	1e-51	-	128838519	128840677	0	1	2158,	0	-51	-49.6	32.7	1
chr6	36454703	36455988	222658	1e-156	+	36454703	36455988	0	1	1285,	0	-156	-154	7.98	1
chr19	53085876	53087224	55762	1e-17	+	53085876	53087224	0	1	1348,	0	-17	-16	48.6	1
chr14	24027950	24028221	79178	5e-09	+	24027950	24028221	0	1	271,	0	-8.3	-7.2	12.2	1
chr13	23914563	23915793	26278	1e-167	-	23914563	23915793	0	1	1230,	0	-167	-165	15.4	1
chr19	13876839	13879189	84245	4.6e-08	+	13876839	13879189	0	2	104,17,	0,2333	-7.34	-6.51	1.71	1
chr12	51747742	51748221	11226	1.6e-21	-	51747742	51748221	0	1	479,	0	-20.8	-19.7	10	1
chr6	116757257	116758514	29940	1e-266	+	116757257	116758514	0	1	1257,	0	-266	-264	17.6	1
chr11	59568445	59568596	6809	7.8e-07	+	59568445	59568596	0	1	151,	0	-6.11	-4.67	1.52	1
chr11	70229616	70229887	8500	6.3e-25	+	70229616	70229887	0	1	271,	0	-24.2	-23.1	3.41	1
chr14	35515627	35522577	283635	2.6e-10	+	35515627	35522577	0	2	207,94,	0,6856	-9.59	-8.35	1.99	1
chr4	184124754	184129254	80014	0.00026	+	184124754	184129254	0	2	2,149,	0,4351	-3.58	-2.39	1.92	1
chr17	74140710	74141307	114804	2e-77	-	74140710	74141307	0	1	597,	0	-76.7	-75.1	15.2	1
chr10	51592080	51593368	100287932	6.3e-49	-	51592080	51593368	0	2	539,31,	0,1257	-48.2	-46.9	2.9	1
chr20	48504476	48505075	23315	2.5e-13	+	48504476	48505075	0	1	599,	0	-12.6	-11.4	21.5	1
chr20	34214643	34215240	8904	5.8e-05	-	34214643	34215240	0	2	82,39,	0,558	-4.24	-3.36	2.02	1
chr10	28812847	28814900	220906	1.3e-45	-	28812847	28814900	0	2	693,24,	0,2029	-44.9	-43.6	18.3	1
chr18	60241327	60243817	54877	5e-28	+	60241327	60243817	0	2	1456,73,	0,2417	-27.3	-26.2	11.9	1
chr1	33235581	33235910	57648	7.9e-42	+	33235581	33235910	0	1	329,	0	-41.1	-39.6	4.27	1
chr20	19981282	19981790	54453	1.3e-14	+	19981282	19981790	0	1	508,	0	-13.9	-12.6	8.05	1
chr17	42476683	42476804	23131	0.00039	-	42476683	42476804	0	1	121,	0	-3.41	-2.69	3.25	1
chr16	697462	697850	84331	0.00091	+	697462	697850	0	2	82,68,	0,320	-3.04	-2.42	6.02	1
chr3	136538069	136538130	80723	0.0036	+	136538069	136538130	0	1	61,	0	-2.44	-1.77	3.19	1
chr14	67826394	67826602	51382	1.2e-08	-	67826394	67826602	0	1	208,	0	-7.91	-6.82	5.86	1
chr14	62016440	62017249	5583	1.6e-24	+	62016440	62017249	0	1	809,	0	-23.8	-22.7	66.2	1
chr17	1629025	1633778	124997	1e-151	+	1629025	1633778	0	2	2895,105,	0,4648	-151	-149	30.1	1
chr1	231664398	231664549	100303453	2.5e-06	+	231664398	231664549	0	1	151,	0	-5.6	-4.62	11.1	1
chr7	130067806	130080871	95681	0.00034	-	130067806	130080871	0	2	53,97,	0,12968	-3.47	-2.74	2.51	1
chr3	44700467	44700885	7584	1.6e-07	+	44700467	44700885	0	1	418,	0	-6.8	-5.7	5.65	1
chr6	27419684	27424622	7738	1e-125	-	27419684	27424622	0	2	1355,18,	0,4920	-125	-123	15.3	1
chr11	60162025	60162264	58475	6.3e-11	+	60162025	60162264	0	1	239,	0	-10.2	-8.56	6.51	1
chr9	139333507	139333957	56623	4e-12	-	139333507	139333957	0	1	450,	0	-11.4	-10.3	8.82	1
chr22	28395710	28396760	284900	7.9e-16	+	28395710	28396760	0	1	1050,	0	-15.1	-14.2	38.4	1
chr17	58120551	58121478	63897	1e-139	-	58120551	58121478	0	1	927,	0	-139	-137	13.5	1
chr7	72416745	72417225	9883	5e-47	+	72416745	72417225	0	1	480,	0	-46.3	-44.9	12.6	1
chr20	48522946	48523246	9825	1e-10	-	48522946	48523246	0	1	300,	0	-10	-8.74	3.4	1
chr2	204303359	204305007	65059	0	-	204303359	204305007	0	1	1648,	0	-392	#NAME?	79.1	1
chr17	26653561	26653890	27346	1.3e-12	+	26653561	26653890	0	1	329,	0	-11.9	-10.5	8.27	1
chr19	2249290	2249617	268	1e-106	+	2249290	2249617	0	1	327,	0	-106	-105	14.3	1
chr17	61773697	61773937	80774	4.7e-05	-	61773697	61773937	0	1	240,	0	-4.33	-3.23	10.5	1
chr4	7033564	7033923	100129931	2.3e-07	-	7033564	7033923	0	1	359,	0	-6.64	-5.61	4.13	1
chr17	41477158	41477996	379	0	+	41477158	41477996	0	1	838,	0	-1010	#NAME?	256	1
chr5	72861005	72861392	57763	1.4e-10	-	72861005	72861392	0	1	387,	0	-9.85	-8.9	4.56	1
chr17	45916840	45918187	90507	1.7e-05	-	45916840	45918187	0	3	169,182,152,	0,716,1195	-4.78	-3.64	2.45	1
chr10	63853739	63853800	84159	0.0036	+	63853739	63853800	0	1	61,	0	-2.44	-1.77	2.24	1
chr17	56434945	56435185	54894	3.4e-06	-	56434945	56435185	0	1	240,	0	-5.47	-4.65	3.65	1
chr17	79514023	79514563	80233	3.2e-70	-	79514023	79514563	0	1	540,	0	-69.5	-67.8	8.35	1
chr1	3649705	3650306	7161	1.3e-08	+	3649705	3650306	0	1	601,	0	-7.87	-6.86	16.3	1
chr2	42577914	42578154	9167	6.3e-11	-	42577914	42578154	0	1	240,	0	-10.2	-9.02	3.84	1
chr6	31704042	31704341	1192	1.3e-93	-	31704042	31704341	0	1	299,	0	-92.9	-90.8	19.3	1
chr19	10224686	10226064	5032	1e-104	+	10224686	10226064	0	1	1378,	0	-104	-102	17.3	1
chr16	69143678	69143829	3038	7.2e-05	+	69143678	69143829	0	1	151,	0	-4.14	-3.39	13.6	1
chr3	64084613	64133165	166336	1.3e-20	-	64084613	64133165	0	2	988,660,	0,47892	-19.9	-18.1	4.43	1
chr7	65843570	65843900	285908	0.00011	-	65843570	65843900	0	1	330,	0	-3.96	-3.09	3.53	1
chr4	433922	466380	170960	1.6e-100	-	433922	466380	0	2	4299,17,	0,32441	-99.8	-98.1	11.2	1
chr2	99985871	99993081	9669	7.9e-72	+	99985871	99993081	0	3	73,75,272,	0,2247,6938	-71.1	-69.5	4.97	1
chr17	16229153	16229573	9487	4e-39	+	16229153	16229573	0	1	420,	0	-38.4	-37.1	10.9	1
chr22	42221739	42222303	79879	2e-25	+	42221739	42222303	0	1	564,	0	-24.7	-23.5	20.5	1
chr8	38174363	38174813	54904	4.4e-08	-	38174363	38174813	0	1	450,	0	-7.36	-6.53	2.9	1
chr17	13928468	13928707	94158	3.7e-07	+	13928468	13928707	0	1	239,	0	-6.43	-5.62	5.91	1
chr12	32138388	32138778	55196	6.9e-06	+	32138388	32138778	0	1	390,	0	-5.16	-4.15	3.3	1
chr2	120129885	120130122	1622	4e-12	+	120129885	120130122	0	1	237,	0	-11.4	-10.4	4.01	1
chr12	113379440	113379980	4940	4.3e-06	+	113379440	113379980	0	1	540,	0	-5.37	-4.35	6.46	1
chr18	48252520	48255892	5596	1.1e-08	+	48252520	48255892	0	2	25,365,	0,3007	-7.96	-6.76	13.4	1
chr7	27579762	27580239	11112	2e-13	-	27579762	27580239	0	1	477,	0	-12.7	-11.7	39.7	1
chr16	19535268	19536109	9738	0.00013	+	19535268	19536109	0	2	142,8,	0,833	-3.9	-3.15	3.72	1
chr20	57569890	57570158	51497	1e-26	+	57569890	57570158	0	1	268,	0	-26	-24.5	10.9	1
chr5	176491538	176491868	23567	1.3e-22	+	176491538	176491868	0	1	330,	0	-21.9	-20.7	6.25	1
chr3	149530860	149563833	11342	1e-10	+	149530860	149563833	0	3	280,102,36,	0,851,32937	-9.99	-9.05	9.75	1
chr2	237032646	237033247	116987	1e-156	+	237032646	237033247	0	1	601,	0	-156	-154	19.6	1
chr9	97861425	97861666	2176	5.6e-06	-	97861425	97861666	0	1	241,	0	-5.25	-4.46	3.17	1
chr17	75315614	75369326	10801	4e-41	+	75315614	75369326	0	2	816,55,	0,53657	-40.4	-38.1	3.99	1
chr8	27592656	27592776	55246	0.00035	-	27592656	27592776	0	1	120,	0	-3.46	-2.73	3.42	1
chr13	76100507	76101978	170622	1e-246	-	76100507	76101978	0	2	268,30,	0,1441	-246	-244	4.12	1
chr2	198570446	198572605	92935	0	+	198570446	198572605	0	1	2159,	0	-330	#NAME?	157	1
chr2	73118485	73119170	6697	3.2e-20	+	73118485	73119170	0	1	685,	0	-19.5	-17.6	2.13	1
chr11	121163417	121163649	6309	7.4e-09	+	121163417	121163649	0	2	108,73,	0,159	-8.13	-7.04	19.5	1
chr1	40960635	40961925	339559	2.5e-46	+	40960635	40961925	0	1	1290,	0	-45.6	-44.3	10.7	1
chr1	235713819	235713969	2786	0.00035	-	235713819	235713969	0	1	150,	0	-3.46	-2.38	4.88	1
chr11	1756330	1756511	402778	3.8e-05	-	1756330	1756511	0	1	181,	0	-4.42	-3.53	6.41	1
chr7	44663993	44664114	4967	5.1e-05	+	44663993	44664114	0	1	121,	0	-4.29	-2.32	6.03	1
chr16	30790339	30791869	23361	1e-30	-	30790339	30791869	0	1	1530,	0	-30	-28.7	19.8	1
chr7	29686435	29686526	646762	0.00012	-	29686435	29686526	0	1	91,	0	-3.91	-2.99	4.66	1
chr9	136628628	136628868	7410	1.3e-14	-	136628628	136628868	0	1	240,	0	-13.9	-12.7	4.69	1
chrX	70472634	70472995	9203	6.3e-17	-	70472634	70472995	0	1	361,	0	-16.2	-15.2	3.71	1
chr19	39663665	39663845	10298	5e-06	+	39663665	39663845	0	1	180,	0	-5.3	-4.28	2.09	1
chr4	25125400	25125820	51091	3.2e-34	-	25125400	25125820	0	1	420,	0	-33.5	-32.3	10.2	1
chr6	33168602	33169381	7922	1.3e-51	+	33168602	33169381	0	1	779,	0	-50.9	-48.3	3.3	1
chr1	53236719	53237349	79699	4e-13	+	53236719	53237349	0	1	630,	0	-12.4	-10.8	4.88	1
chr3	38524647	38525668	93	1e-114	+	38524647	38525668	0	1	1021,	0	-114	-112	10.2	1
chrX	118722299	118722717	55922	1e-164	-	118722299	118722717	0	1	418,	0	-164	-162	6.79	1
chr5	140070803	140071013	3035	1e-11	-	140070803	140071013	0	1	210,	0	-11	-9.96	5.88	1
chr19	54618789	54619118	26121	2e-15	+	54618789	54619118	0	1	329,	0	-14.7	-13.5	8.02	1
chr1	151132969	151133477	388695	3.2e-14	-	151132969	151133477	0	1	508,	0	-13.5	-12.3	21.5	1
chr11	67024261	67025101	22992	6.3e-53	+	67024261	67025101	0	1	840,	0	-52.2	-50.8	14.3	1
chr22	28394638	28394999	23331	4e-22	-	28394638	28394999	0	1	361,	0	-21.4	-20.3	8.73	1
chr1	243289196	243289436	9859	1.6e-23	-	243289196	243289436	0	1	240,	0	-22.8	-21.7	2.7	1
chr12	113826414	113826624	196463	4.2e-05	+	113826414	113826624	0	1	210,	0	-4.38	-3.47	3.04	1
chr19	5993859	5994009	5990	0.0003	-	5993859	5994009	0	1	150,	0	-3.53	-2.51	3.06	1
chr1	40235316	40236094	64064	3.2e-13	-	40235316	40236094	0	1	778,	0	-12.5	-11.5	35.3	1
chr6	38140084	38140384	114781	1e-19	-	38140084	38140384	0	1	300,	0	-19	-17.9	32	1
chr5	132216584	132219068	27125	1e-143	-	132216584	132219068	0	2	294,37,	0,2447	-143	-141	8.28	1
chr20	34330017	34330258	9584	3.2e-67	-	34330017	34330258	0	1	241,	0	-66.5	-64.6	28	1
chr16	315699	316058	83986	2.5e-20	+	315699	316058	0	1	359,	0	-19.6	-18.4	4.55	1
chr17	40688249	40688400	4669	4.7e-05	+	40688249	40688400	0	1	151,	0	-4.33	-3.43	4.9	1
chr14	23495296	23502619	5693	2.5e-06	-	23495296	23502619	0	3	288,85,43,	0,1657,7280	-5.6	-4.75	11.4	1
chr2	217279855	217280214	50485	3.2e-46	+	217279855	217280214	0	1	359,	0	-45.5	-44.1	6.28	1
chr5	43505906	43508682	375444	6.3e-52	-	43505906	43508682	0	2	590,4,	0,2772	-51.2	-49.8	18.9	1
chr17	78320865	78321376	57674	6.3e-13	+	78320865	78321376	0	1	511,	0	-12.2	-11.3	4.19	1
chr1	1246964	1247205	54973	7.9e-24	-	1246964	1247205	0	1	241,	0	-23.1	-21.9	6.66	1
chr16	2550877	2551148	57465	3.1e-09	+	2550877	2551148	0	1	271,	0	-8.51	-7.49	4.99	1
chr5	112319753	112320293	167227	4e-16	+	112319753	112320293	0	1	540,	0	-15.4	-13.9	7.2	1
chr22	51062999	51063536	410	6.3e-12	-	51062999	51063536	0	1	537,	0	-11.2	-10	50.7	1
chr11	76731350	76731590	55331	4e-15	+	76731350	76731590	0	1	240,	0	-14.4	-13.5	3.98	1
chr19	7600610	7600701	10908	0.00044	+	7600610	7600701	0	1	91,	0	-3.36	-2.52	2.4	1
chr1	1017435	1019344	54991	3.2e-76	-	1017435	1019344	0	2	932,50,	0,1859	-75.5	-73.5	11.7	1
chr12	80328511	80328662	4659	0.0059	-	80328511	80328662	0	1	151,	0	-2.23	-1.72	5.02	1
chrX	153688560	153688981	55558	6.3e-65	+	153688560	153688981	0	1	421,	0	-64.2	-62.5	18.3	1
chr7	44101165	44101315	28988	2.8e-07	+	44101165	44101315	0	1	150,	0	-6.56	-5.74	2.8	1
chr14	105236376	105236647	207	1.3e-09	-	105236376	105236647	0	1	271,	0	-8.89	-7.77	3.7	1
chr3	18390956	18391166	6304	0.00069	-	18390956	18391166	0	1	210,	0	-3.16	-2.31	2.45	1
chr19	6361462	6361699	8192	2e-24	+	6361462	6361699	0	1	237,	0	-23.7	-22.2	10.1	1
chr13	103451133	103451374	79070	5.1e-08	-	103451133	103451374	0	1	241,	0	-7.29	-6.23	12.7	1
chr5	74892061	74893791	51426	2.5e-90	+	74892061	74893791	0	3	942,43,33,	0,1510,1697	-89.6	-88	10.5	1
chr2	86327272	86332919	25885	0.0023	-	86327272	86332919	0	2	23,97,	0,5550	-2.64	-1.72	1.64	1
chr3	184770041	184770342	23355	1.6e-16	+	184770041	184770342	0	1	301,	0	-15.8	-14.8	8.18	1
chr12	133732162	133733598	7556	7.8e-09	+	133732162	133733598	0	1	1436,	0	-8.11	-7.22	32.1	1
chr1	115123939	115127273	163259	1e-05	-	115123939	115127273	0	2	73,78,	0,3256	-5	-3.85	1.71	1
chr15	72668572	72668959	80072	1.2e-07	+	72668572	72668959	0	1	387,	0	-6.93	-6.1	10.7	1
chr12	122216473	122217551	144404	7.9e-61	+	122216473	122217551	0	1	1078,	0	-60.1	-58.2	106	1
chr16	30543607	30544290	65988	1e-103	-	30543607	30544290	0	1	683,	0	-103	-102	12.8	1
chr14	50359982	50361296	382	1e-63	+	50359982	50361296	0	1	1314,	0	-63	-60.2	3.76	1
chr1	155707961	155708321	7818	1.6e-42	+	155707961	155708321	0	1	360,	0	-41.8	-39.7	2.28	1
chr16	90032432	90033031	54849	1.6e-38	+	90032432	90033031	0	1	599,	0	-37.8	-36.1	17.2	1
chr18	11884276	11884576	2774	6.3e-31	+	11884276	11884576	0	1	300,	0	-30.2	-29.1	5.03	1
chr5	55236220	55243397	3572	0	-	55236220	55243397	0	3	1427,82,77,	0,2277,7100	-667	#NAME?	134	1
chr15	45021514	45028630	140691	8.7e-06	+	45021514	45028630	0	2	236,91,	0,7025	-5.06	-3.86	5.39	1
chr15	50646400	50647000	100129387	1.4e-05	+	50646400	50647000	0	1	600,	0	-4.84	-3.51	3.45	1
chr5	110835509	110835947	134429	2e-29	-	110835509	110835947	0	2	295,4,	0,434	-28.7	-27.6	4.5	1
chr8	127566718	127566959	157638	2e-21	-	127566718	127566959	0	1	241,	0	-20.7	-19.6	2.61	1
chr4	41145012	41216515	323	7.9e-12	-	41145012	41216515	0	2	147,94,	0,71409	-11.1	-9.54	2.21	1
chr16	88781745	88782255	9780	1.3e-73	-	88781745	88782255	0	1	510,	0	-72.9	-71.2	14.5	1
chr18	7567462	7567852	5797	2.6e-06	+	7567462	7567852	0	1	390,	0	-5.58	-4.38	3.05	1
chr15	64463546	64473412	53944	7.8e-09	-	64463546	64473412	0	3	638,107,34,	0,9000,9832	-8.11	-7.22	32.1	1
chr1	160000411	160001783	93183	2.5e-88	-	160000411	160001783	0	1	1372,	0	-87.6	-86	43.4	1
chr10	104181609	104181996	79176	6.3e-27	+	104181609	104181996	0	1	387,	0	-26.2	-25	9.52	1
chr10	103577701	103578180	10724	2.5e-11	-	103577701	103578180	0	1	479,	0	-10.6	-8.79	1.83	1
chr10	38120485	38122012	57209	1.3e-49	-	38120485	38122012	0	1	1527,	0	-48.9	-47.6	11.5	1
chr15	80886233	80886714	9915	1e-15	+	80886233	80886714	0	1	481,	0	-15	-14	7.98	1
chr3	25832494	25833333	54995	1e-82	+	25832494	25833333	0	1	839,	0	-82	-80.4	9.23	1
chr3	39184027	39185431	64651	2.5e-22	-	39184027	39185431	0	1	1404,	0	-21.6	-20	4.41	1
chr1	1683629	1683780	65220	2e-08	-	1683629	1683780	0	1	151,	0	-7.7	-6.7	4.16	1
chr19	50098909	50099119	57479	8.5e-10	+	50098909	50099119	0	1	210,	0	-9.07	-7.95	3.29	1
chr12	50188673	50188764	57701	0.0017	-	50188673	50188764	0	1	91,	0	-2.78	-1.82	2.36	1
chr1	46810531	46810801	387338	3.2e-13	+	46810531	46810801	0	1	270,	0	-12.5	-11.6	5.58	1
chr8	80831153	80915327	28957	9.1e-09	-	80831153	80915327	0	2	230,94,	0,84080	-8.04	-6.53	1.64	1
chr2	239355826	239355887	51665	0.003	+	239355826	239355887	0	1	61,	0	-2.53	-1.76	3.25	1
chr10	81915297	81917444	311	2e-37	-	81915297	81917444	0	2	371,48,	0,2099	-36.7	-35	4.68	1
chr5	145562053	145562204	51520	1.2e-10	-	145562053	145562204	0	1	151,	0	-9.93	-9.04	2.6	1
chr4	106196732	106198142	54790	7.9e-21	+	106196732	106198142	0	1	1410,	0	-20.1	-19	16.3	1
chr19	45873724	45873845	2068	0.00051	-	45873724	45873845	0	1	121,	0	-3.29	-2.46	9.76	1
chr5	664256	664377	11076	5.2e-05	-	664256	664377	0	1	121,	0	-4.28	-2.31	2.83	1
chr1	35899150	35899420	79932	8.7e-09	-	35899150	35899420	0	1	270,	0	-8.06	-6.64	5.48	1
chr2	65298614	65298704	23177	0.0017	+	65298614	65298704	0	1	90,	0	-2.76	-1.98	4.68	1
chr19	6210421	6211734	4298	1e-121	-	6210421	6211734	0	1	1313,	0	-121	-118	23.4	1
chr1	27681699	27681849	9064	2e-05	-	27681699	27681849	0	1	150,	0	-4.7	-3.93	15.2	1
chr8	145734551	145735260	113655	4e-15	+	145734551	145735260	0	1	709,	0	-14.4	-13.2	33.5	1
chr11	124857150	124861376	80071	2e-83	+	124857150	124861376	0	2	880,20,	0,4206	-82.7	-81.2	15	1
chr19	8550515	8550784	4670	1e-100	+	8550515	8550784	0	1	269,	0	-100	-98.3	3.8	1
chr6	12296322	12296950	1906	7.9e-67	+	12296322	12296950	0	1	628,	0	-66.1	-64.5	21.6	1
chr1	24969713	24970075	10250	3.7e-07	+	24969713	24970075	0	2	125,26,	0,336	-6.43	-5.41	12.4	1
chr10	91087691	91092274	3437	2e-06	+	91087691	91092274	0	2	144,36,	0,4547	-5.7	-4.72	7.81	1
chr3	42251386	42251597	22906	2.3e-08	+	42251386	42251597	0	1	211,	0	-7.63	-6.78	3.4	1
chr20	47887396	47887696	57169	1.9e-05	-	47887396	47887696	0	1	300,	0	-4.73	-3.75	2.47	1
chr1	160187033	160188159	50717	2e-42	-	160187033	160188159	0	2	465,46,	0,1080	-41.7	-40	11	1
chr20	17950450	17956423	92667	4e-35	+	17950450	17956423	0	2	563,97,	0,5876	-34.4	-33.2	7.98	1
chr2	152319589	152320039	55183	1e-284	+	152319589	152320039	0	1	450,	0	-284	-281	7.72	1
chr20	30784256	30784616	5326	2.2e-05	-	30784256	30784616	0	1	360,	0	-4.65	-3.72	3.49	1
chr14	57857879	57858417	122830	4e-63	+	57857879	57858417	0	1	538,	0	-62.4	-60.9	8.46	1
chr11	45826641	45827804	55343	2e-12	+	45826641	45827804	0	1	1163,	0	-11.7	-10.4	2.71	1
chr6	52268137	52268408	85315	1e-13	+	52268137	52268408	0	1	271,	0	-13	-12	5.75	1
chr7	2701389	2703032	80727	0	+	2701389	2703032	0	1	1643,	0	-510	#NAME?	11.6	1
chr20	4762707	4763128	9770	1.5e-06	-	4762707	4763128	0	1	421,	0	-5.82	-4.99	23.8	1
chr6	161554504	161554714	56895	2.8e-07	-	161554504	161554714	0	1	210,	0	-6.55	-5.73	11.5	1
chr15	52121824	52155008	29766	5.6e-07	+	52121824	52155008	0	2	209,1,	0,33183	-6.25	-5.4	4.04	1
chr7	140396393	140396757	100134713	3.2e-30	-	140396393	140396757	0	2	227,43,	0,321	-29.5	-28	35.1	1
chr1	32374210	32374511	8073	1e-157	-	32374210	32374511	0	1	301,	0	-157	-155	3.18	1
chr22	37770981	37771131	114794	3.5e-05	-	37770981	37771131	0	1	150,	0	-4.45	-3.56	3.59	1
chr5	132159866	132160046	134549	2.6e-07	-	132159866	132160046	0	1	180,	0	-6.59	-5.49	2.4	1
chr17	62120837	62121496	2081	5e-16	-	62120837	62121496	0	1	659,	0	-15.3	-14.3	9.29	1
chr6	33405592	33405832	8831	1e-52	+	33405592	33405832	0	1	240,	0	-52	-50.6	13.8	1
chr1	32660512	32661080	200081	1e-134	+	32660512	32661080	0	1	568,	0	-134	-132	6.83	1
chr6	84798930	84799350	112609	2e-12	+	84798930	84799350	0	1	420,	0	-11.7	-10.7	15.2	1
chr9	35732331	35732392	7094	0.0017	-	35732331	35732392	0	1	61,	0	-2.77	-1.99	5.37	1
chr9	136894747	136895077	266655	1e-117	+	136894747	136895077	0	1	330,	0	-117	-116	76	1
chr14	21897268	21897418	57680	0.0012	-	21897268	21897418	0	1	150,	0	-2.93	-2.33	11.4	1
chr6	3271119	3271299	63027	8.5e-05	-	3271119	3271299	0	1	180,	0	-4.07	-3.18	3.63	1
chr1	93645857	93646186	50999	6.3e-43	-	93645857	93646186	0	1	329,	0	-42.2	-40.9	81.7	1
chr13	103514654	103515401	2073	2.5e-47	+	103514654	103515401	0	1	747,	0	-46.6	-45.2	8.33	1
chr2	112525213	112526713	64682	7.9e-67	-	112525213	112526713	0	1	1500,	0	-66.1	-64.6	59.5	1
chr5	14692963	14693502	90268	1e-213	+	14692963	14693502	0	1	539,	0	-213	-211	41.8	1
chr11	62557786	62558343	79064	1.6e-45	-	62557786	62558343	0	1	557,	0	-44.8	-42.2	4.19	1
chr9	4585435	4585794	6505	7.9e-36	+	4585435	4585794	0	1	359,	0	-35.1	-33.9	8.55	1
chr1	803779	804019	284593	7.8e-10	-	803779	804019	0	1	240,	0	-9.11	-8.24	4.29	1
chr1	155823106	155826955	54856	4e-69	-	155823106	155826955	0	2	491,18,	0,3831	-68.4	-66.9	4.24	1
chr18	32826538	32826778	84307	1.6e-24	+	32826538	32826778	0	1	240,	0	-23.8	-22.6	4.2	1
chr5	14615206	14615687	54491	1.6e-25	+	14615206	14615687	0	1	481,	0	-24.8	-23.7	23.2	1
chr9	19116177	19116448	123	4e-35	-	19116177	19116448	0	1	271,	0	-34.4	-33.2	4.93	1
chr8	142228561	142228892	57210	0.0006	-	142228561	142228892	0	1	331,	0	-3.22	-2.51	11	1
chr8	42693003	42694476	55145	1.6e-53	-	42693003	42694476	0	2	476,148,	0,1325	-52.8	-51.4	8.17	1
chr3	51995231	51995412	57060	3.3e-06	-	51995231	51995412	0	1	181,	0	-5.48	-4.1	2.54	1
chr1	31194231	31194559	100129196	1.5e-08	+	31194231	31194559	0	1	328,	0	-7.82	-6.98	23.8	1
chr19	19734465	19735241	9170	1e-198	-	19734465	19735241	0	1	776,	0	-198	-196	66.8	1
chr17	7761393	7761573	124637	3.1e-05	+	7761393	7761573	0	1	180,	0	-4.51	-3.39	2.08	1
chr1	24117645	24117735	11313	4.4e-10	+	24117645	24117735	0	1	90,	0	-9.36	-8.23	8.92	1
chr21	34860326	34861668	54943	6.3e-42	-	34860326	34861668	0	1	1342,	0	-41.2	-39.9	22.6	1
chr1	2116078	2116858	199990	1.6e-11	-	2116078	2116858	0	1	780,	0	-10.8	-9.62	6.64	1
chr7	50660207	50660746	2887	1e-113	-	50660207	50660746	0	1	539,	0	-113	-110	15.6	1
chr6	10529014	10556090	2651	1e-114	+	10529014	10556090	0	2	1055,142,	0,26934	-114	-113	33.5	1
chr5	111091493	111091584	9315	0.00017	-	111091493	111091584	0	1	91,	0	-3.78	-2.87	1.67	1
chr10	21962295	21962685	8028	2.3e-07	+	21962295	21962685	0	1	390,	0	-6.64	-5.76	2.99	1
chr1	23418713	23418834	7798	2.5e-05	-	23418713	23418834	0	1	121,	0	-4.61	-3.68	2.18	1
chr6	41773474	41773685	25862	5.2e-05	-	41773474	41773685	0	1	211,	0	-4.28	-3.53	4.5	1
chr9	131456261	131456949	6418	6e-05	+	131456261	131456949	0	2	60,30,	0,658	-4.22	-3.12	1.21	1
chr7	140154242	140154512	23608	3.2e-16	-	140154242	140154512	0	1	270,	0	-15.5	-13.5	2.39	1
chr6	31498838	31500580	100532737	7.9e-05	-	31498838	31500580	0	3	136,110,24,	0,234,1718	-4.1	-3.38	5.52	1
chr13	50108142	50108262	55213	8.9e-05	-	50108142	50108262	0	1	120,	0	-4.05	-2.97	2.48	1
chr1	155023136	155023316	149095	2.5e-06	+	155023136	155023316	0	1	180,	0	-5.6	-4.67	2.88	1
chr6	105609651	105624102	64208	3.2e-76	-	105609651	105624102	0	2	384,35,	0,14416	-75.5	-74	11.6	1
chr17	29226119	29226714	79736	4e-31	-	29226119	29226714	0	1	595,	0	-30.4	-29.2	84.5	1
chr3	79067580	79067791	6091	1.5e-07	-	79067580	79067791	0	1	211,	0	-6.81	-5.47	3.33	1
chr7	6776785	6777293	441194	0	+	6776785	6777293	0	1	508,	0	-419	#NAME?	115	1
chr6	52268736	52271046	85315	1e-85	+	52268736	52271046	0	1	2310,	0	-85	-83.4	16.6	1
chr17	76803095	76803606	57602	3.2e-12	-	76803095	76803606	0	1	511,	0	-11.5	-10.4	28.8	1
chr14	68249576	68250116	23503	3.2e-16	-	68249576	68250116	0	1	540,	0	-15.5	-14.5	11.3	1
chr6	150001154	150001514	9113	3.2e-06	-	150001154	150001514	0	1	360,	0	-5.5	-4.43	19.3	1
chr16	2998850	2999299	84256	1e-129	+	2998850	2999299	0	1	449,	0	-129	-128	11.2	1
chr15	31233846	31234086	22909	1e-05	+	31233846	31234086	0	1	240,	0	-5	-4.2	18.1	1
chr2	71649963	71650802	27332	8.1e-10	+	71649963	71650802	0	1	839,	0	-9.09	-7.61	2.88	1
chr2	109086110	109092061	9648	2e-66	+	109086110	109092061	0	3	2462,73,71,	0,3172,5880	-65.7	-64.2	8.99	1
chr18	71815774	71816129	29090	2e-11	+	71815774	71816129	0	1	355,	0	-10.7	-9.82	2.61	1
chrX	154444700	154448485	7411	5e-27	+	154444700	154448485	0	2	152,26,	0,3759	-26.3	-25.1	2.96	1
chr16	4902862	4902953	29855	0.00029	+	4902862	4902953	0	1	91,	0	-3.54	-2.51	3.55	1
chr8	30436325	30437864	2961	1.6e-35	-	30436325	30437864	0	2	229,67,	0,1472	-34.8	-33.6	5.21	1
chr13	74269100	74289575	11278	1.6e-57	-	74269100	74289575	0	2	708,71,	0,20404	-56.8	-55.4	7.67	1
chr16	20746030	20747733	55623	9.999889e-320	-	20746030	20747733	0	1	1703,	0	-319	-316	12.3	1
chr19	17330039	17330188	55850	0.00054	+	17330039	17330188	0	1	149,	0	-3.27	-2.55	1.83	1
chr15	65442932	65443232	10845	1.4e-08	-	65442932	65443232	0	1	300,	0	-7.86	-6.97	20.2	1
chr14	21960726	21960877	9878	3.1e-05	+	21960726	21960877	0	1	151,	0	-4.51	-3.22	1.65	1
chr8	38133129	38133903	54904	0.00035	-	38133129	38133903	0	2	271,90,	0,684	-3.45	-2.4	5.39	1
chr6	42848639	42848729	285855	0.0029	+	42848639	42848729	0	1	90,	0	-2.54	-1.61	2.64	1
chr11	65408318	65409775	6494	7.9e-21	+	65408318	65409775	0	2	753,55,	0,1402	-20.1	-18.2	3.26	1
chr8	33246523	33247270	84750	6.3e-70	-	33246523	33247270	0	1	747,	0	-69.2	-67.6	13.5	1
chr1	159890130	159893298	8407	1.6e-33	-	159890130	159893298	0	2	197,73,	0,3095	-32.8	-31.2	23.9	1
chr6	117803879	117825023	285761	2.8e-08	+	117803879	117825023	0	2	177,94,	0,21050	-7.55	-6.21	3.75	1
chr17	36555849	36556300	30837	1.7e-06	+	36555849	36556300	0	1	451,	0	-5.77	-4.73	9.68	1
chr16	70190393	70190933	55066	2e-37	+	70190393	70190933	0	1	540,	0	-36.7	-35.4	8.82	1
chr17	38435538	38435748	147179	5.8e-06	+	38435538	38435748	0	1	210,	0	-5.24	-4.4	3.22	1
chr18	19348613	19353665	57534	1e-06	+	19348613	19353665	0	2	100,81,	0,4971	-5.99	-4.63	2.28	1
chr1	160252845	160254941	50717	5e-17	-	160252845	160254941	0	2	54,97,	0,1999	-16.3	-15	9.76	1
chr19	9271847	9273792	57693	1e-108	+	9271847	9273792	0	1	1945,	0	-108	-106	88.8	1
chr4	1722486	1723024	92305	2.5e-09	-	1722486	1723024	0	1	538,	0	-8.61	-7.5	7.81	1
chr22	38169897	38170018	11078	0.00039	+	38169897	38170018	0	1	121,	0	-3.41	-2.4	1.83	1
chr3	44962030	44962241	51304	2.5e-10	-	44962030	44962241	0	1	211,	0	-9.6	-8.65	7.35	1
chr20	40043829	40044100	84181	5e-12	-	40043829	40044100	0	1	271,	0	-11.3	-10.4	4.57	1
chr15	42450958	42451347	23339	7.9e-13	-	42450958	42451347	0	1	389,	0	-12.1	-11.1	4.74	1
chr1	67450286	67450587	57708	2.2e-07	+	67450286	67450587	0	1	301,	0	-6.65	-5.62	8.78	1
chr19	40520919	40521606	339327	6.3e-24	+	40520919	40521606	0	1	687,	0	-23.2	-22	7.37	1
chr12	107364894	107365372	90488	1.3e-25	+	107364894	107365372	0	1	478,	0	-24.9	-23.2	25.4	1
chr20	30823474	30823594	23509	0.0003	+	30823474	30823594	0	1	120,	0	-3.53	-2.8	2.89	1
chr6	7581353	7582905	1832	3.2e-93	+	7581353	7582905	0	2	449,31,	0,1521	-92.5	-90.8	9.61	1
chr7	138269525	138270332	8805	1e-288	+	138269525	138270332	0	1	807,	0	-288	-286	11.3	1
chr16	69782834	69783013	28987	1.3e-05	-	69782834	69783013	0	1	179,	0	-4.88	-3.69	1.44	1
chr1	155869977	155870365	6016	1e-121	-	155869977	155870365	0	1	388,	0	-121	-119	11.6	1
chr19	2835238	2835508	115196	2.2e-08	+	2835238	2835508	0	1	270,	0	-7.65	-6.17	4.34	1
chr11	64811708	64812300	29901	1e-204	+	64811708	64812300	0	1	592,	0	-204	-202	111	1
chrX	46359226	46360215	641339	1.6e-51	-	46359226	46360215	0	1	989,	0	-50.8	-49.4	17	1
chr19	13054527	13054946	811	0	+	13054527	13054946	0	1	419,	0	-1170	#NAME?	7.01	1
chr19	17342693	17356121	2063	1e-166	-	17342693	17356121	0	4	742,567,95,370,	0,3614,8786,13058	-166	-164	254	1
chr1	15894274	15895082	23341	3.2e-48	+	15894274	15895082	0	1	808,	0	-47.5	-46.1	16.2	1
chr3	187447111	187447292	604	3.1e-05	-	187447111	187447292	0	1	181,	0	-4.51	-3.4	2.32	1
chr8	27529450	27534106	51435	1e-124	+	27529450	27534106	0	2	1087,21,	0,4635	-124	-122	36.9	1
chr1	149287782	149287843	388692	0.00059	+	149287782	149287843	0	1	61,	0	-3.23	-2.24	5.2	1
chr20	62730060	62731132	4987	2e-13	+	62730060	62731132	0	1	1072,	0	-12.7	-11.8	27.5	1
chr1	203764750	203765459	9877	6.3e-18	+	203764750	203765459	0	2	172,39,	0,670	-17.2	-15.9	7.56	1
chr10	20105878	20106117	84898	6.3e-20	+	20105878	20106117	0	1	239,	0	-19.2	-18	17.4	1
chr16	84087368	84088119	8720	1e-135	-	84087368	84088119	0	1	751,	0	-135	-133	26.6	1
chr11	88026879	88042332	1075	1e-294	-	88026879	88042332	0	4	797,132,116,2,	0,2421,6818,15451	-294	-292	36.4	1
chr1	150599633	150599873	2029	6.6e-06	-	150599633	150599873	0	1	240,	0	-5.18	-4.4	2.6	1
chr7	151874677	151874888	58508	1.6e-19	-	151874677	151874888	0	1	211,	0	-18.8	-17.7	6.75	1
chr19	7688716	7689195	56949	0.011	-	7688716	7689195	0	2	52,9,	0,470	-1.95	-1.48	5.02	1
chr3	126708184	126708514	5361	9.3e-10	+	126708184	126708514	0	1	330,	0	-9.03	-8.11	3.84	1
chr10	103892816	103897775	23082	2.7e-09	+	103892816	103897775	0	2	162,169,	0,4790	-8.57	-7.17	2.5	1
chr20	6057349	6060129	55612	3.2e-40	-	6057349	6060129	0	2	644,47,	0,2733	-39.5	-38.2	10.2	1
chr6	43322570	43323321	24149	6.3e-16	-	43322570	43323321	0	1	751,	0	-15.2	-14.2	5.26	1
chr1	93544791	93545002	22823	4e-12	+	93544791	93545002	0	1	211,	0	-11.4	-10.2	15.1	1
chr17	36829154	36830171	100170841	1e-18	-	36829154	36830171	0	1	1017,	0	-18	-16.7	21.9	1
chrX	153639876	153640026	6901	0.00081	+	153639876	153640026	0	1	150,	0	-3.09	-2.28	4.55	1
chr12	124809136	124810761	9612	3.2e-49	-	124809136	124810761	0	2	993,25,	0,1600	-48.5	-46.3	2.94	1
chr11	77884525	77885023	100289388	3.9e-07	+	77884525	77885023	0	1	498,	0	-6.41	-5.15	5.2	1
chr15	42976537	42977588	57519	1.6e-19	+	42976537	42977588	0	1	1051,	0	-18.8	-17.7	61.9	1
chr16	14738161	14738400	51283	1e-09	+	14738161	14738400	0	1	239,	0	-8.98	-8.06	3.52	1
chr10	25011038	25012507	57584	3.1e-06	-	25011038	25012507	0	3	170,84,17,	0,1047,1452	-5.51	-4.69	3.33	1
chr5	5457470	5457681	23379	1.6e-23	+	5457470	5457681	0	1	211,	0	-22.8	-21.6	7.26	1
chr3	32030501	32030922	344787	4.4e-06	+	32030501	32030922	0	1	421,	0	-5.36	-4.18	5.5	1
chr6	74227236	74227595	1915	1e-146	-	74227236	74227595	0	1	359,	0	-146	-143	7.42	1
chr1	40307423	40307544	54802	0.00019	-	40307423	40307544	0	1	121,	0	-3.72	-2.99	1.8	1
chr22	28397899	28398379	284900	5.4e-06	+	28397899	28398379	0	1	480,	0	-5.27	-4.05	3.94	1
chr11	1774101	1785162	1509	3.9e-09	-	1774101	1785162	0	9	799,99,145,123,233,119,124,160,141,	0,931,1122,2034,4452,6097,6644,8437,10920	-8.41	-7.41	28.8	1
chr22	30165722	30166018	29796	2e-34	+	30165722	30166018	0	1	296,	0	-33.7	-31.8	2.23	1
chr7	105148579	105148969	54517	1e-95	-	105148579	105148969	0	1	390,	0	-95	-93.3	5.88	1
chr10	51371088	51371329	8505	4e-08	-	51371088	51371329	0	1	241,	0	-7.4	-6.26	2.91	1
chr19	13873597	13874106	81576	1e-302	+	13873597	13874106	0	1	509,	0	-302	-300	41.6	1
chr12	57118285	57118758	4666	0.002	-	57118285	57118758	0	2	48,13,	0,460	-2.7	-2.13	2.93	1
chr1	52940512	52941172	23318	0	-	52940512	52941172	0	1	660,	0	-336	#NAME?	16.3	1
chr20	5171639	5171789	8760	0.00017	+	5171639	5171789	0	1	150,	0	-3.78	-2.91	5.47	1
chr3	128444978	128445068	7879	8.3e-05	+	128444978	128445068	0	1	90,	0	-4.08	-2.84	1.47	1
chr16	70367467	70367705	11269	9.3e-07	+	70367467	70367705	0	1	238,	0	-6.03	-4.79	2.74	1
chr19	11475207	11475537	64748	4.5e-10	+	11475207	11475537	0	1	330,	0	-9.35	-7.91	2.48	1
chr5	159344391	159399217	147	1e-14	+	159344391	159399217	0	2	470,332,	0,54494	-14	-12.2	6.16	1
chr3	183368597	183368988	54800	5e-52	+	183368597	183368988	0	1	391,	0	-51.3	-49.9	7.88	1
chr11	34378717	34379555	25841	2e-15	-	34378717	34379555	0	1	838,	0	-14.7	-13.7	11.9	1
chr16	31088645	31088916	9726	1.3e-09	+	31088645	31088916	0	1	271,	0	-8.88	-7.97	6.97	1
chr12	133634440	133634531	7637	0.0027	+	133634440	133634531	0	1	91,	0	-2.57	-1.88	1.61	1
chr2	26203262	26204249	3797	3.2e-44	-	26203262	26204249	0	1	987,	0	-43.5	-42.2	17.7	1
chr19	2732529	2733335	29985	7.9e-20	-	2732529	2733335	0	1	806,	0	-19.1	-17.6	3.37	1
chr1	204190284	204190943	22874	6.3e-20	-	204190284	204190943	0	1	659,	0	-19.2	-17.9	6.59	1
chr8	134309367	134309547	10397	2e-12	-	134309367	134309547	0	1	180,	0	-11.7	-10.7	12	1
chr5	162880703	162886965	134492	5e-80	-	162880703	162886965	0	4	353,152,49,98,	0,3231,3864,6164	-79.3	-77.7	3.55	1
chr11	67259328	67259717	9600	5.6e-09	-	67259328	67259717	0	1	389,	0	-8.25	-7.15	6.44	1
chr12	62797985	62798345	9958	1e-128	+	62797985	62798345	0	1	360,	0	-128	-126	10.7	1
chr4	3769896	3770194	152	3e-08	+	3769896	3770194	0	1	298,	0	-7.52	-6.38	3.41	1
chr1	178426883	178427542	9462	4e-57	+	178426883	178427542	0	1	659,	0	-56.4	-55	14.5	1
chr7	91667739	91667860	10142	1.6e-05	+	91667739	91667860	0	1	121,	0	-4.8	-3.97	2.2	1
chr19	48714119	48722256	22900	5e-14	-	48714119	48722256	0	3	1113,45,129,	0,4477,8008	-13.3	-12.3	40.4	1
chr10	27962637	28024190	283078	4e-70	-	27962637	28024190	0	4	1707,34,336,41,	0,1812,60747,61512	-69.4	-67.9	50	1
chr5	39372432	39372762	1601	1.3e-20	-	39372432	39372762	0	1	330,	0	-19.9	-18.8	5.12	1
chr19	7623862	7625598	10908	1e-05	+	7623862	7625598	0	2	175,65,	0,1671	-5	-4.2	18.1	1
chr12	12629236	12640069	80824	1e-108	-	12629236	12640069	0	3	1713,124,108,	0,3920,10725	-108	-107	18.4	1
chr7	150910229	150910737	10061	2e-42	-	150910229	150910737	0	1	508,	0	-41.7	-40.3	15.1	1
chr8	124027050	124027800	79139	6.3e-21	-	124027050	124027800	0	1	750,	0	-20.2	-18.3	2.41	1
chr2	242674854	242680491	728294	7.4e-06	+	242674854	242680491	0	2	77,44,	0,5593	-5.13	-4.21	2.4	1
chr20	34240735	34252878	10137	0	-	34240735	34252878	0	3	2531,85,197,	0,6116,11946	-770	#NAME?	51.9	1
chr21	34727646	34728573	3454	1e-250	+	34727646	34728573	0	1	927,	0	-250	-248	19.4	1
chr10	105727469	105727590	9748	0.00034	+	105727469	105727590	0	1	121,	0	-3.47	-2.75	1.91	1
chr5	145441993	145442384	153769	2.6e-08	+	145441993	145442384	0	1	391,	0	-7.58	-6.02	2.7	1
chr1	26607572	26607808	83442	4e-19	+	26607572	26607808	0	1	236,	0	-18.4	-16.6	1.46	1
chr15	66782958	66784361	10302	0.0015	-	66782958	66784361	0	2	97,22,	0,1381	-2.82	-2.03	2.31	1
chr20	1357792	1358541	100507495	1.1e-07	+	1357792	1358541	0	1	749,	0	-6.97	-6.14	8.89	1
chr2	122097447	122098226	23332	3.2e-36	-	122097447	122098226	0	1	779,	0	-35.5	-34.2	12.9	1
chr3	10301871	10302350	9797	0	+	10301871	10302350	0	1	479,	0	-889	#NAME?	25.4	1
chr2	55462046	55462750	6233	2e-09	+	55462046	55462750	0	2	52,187,	0,517	-8.69	-7.14	5.42	1
chr6	53213796	53213977	60481	7.8e-05	-	53213796	53213977	0	1	181,	0	-4.11	-3.35	10.1	1
chr9	6007255	6007345	158358	0.0011	-	6007255	6007345	0	1	90,	0	-2.95	-1.85	2.89	1
chr7	140774091	140774362	100507421	3.5e-08	+	140774091	140774362	0	1	271,	0	-7.46	-6.57	29.7	1
chr16	25250523	25255546	342357	6.3e-91	-	25250523	25255546	0	2	1536,441,	0,4582	-90.2	-88.5	19.8	1
chr15	64462649	64463428	53944	2e-58	-	64462649	64463428	0	1	779,	0	-57.7	-56.3	14.5	1
chr19	10464770	10465227	7297	0.0014	-	10464770	10465227	0	2	140,40,	0,417	-2.86	-2.27	10.7	1
chr19	10663760	10664808	65095	5e-92	-	10663760	10664808	0	1	1048,	0	-91.3	-89.6	9.3	1
chr2	74692087	74692537	7841	1.6e-43	-	74692087	74692537	0	1	450,	0	-42.8	-40.6	4.08	1
chr22	26877706	26879679	89781	3.2e-23	-	26877706	26879679	0	2	500,40,	0,1933	-22.5	-20.6	2.36	1
chr2	206166312	206166462	117583	2.6e-05	+	206166312	206166462	0	1	150,	0	-4.59	-3.83	7.06	1
chr5	70265955	70266255	4671	3e-10	-	70265955	70266255	0	1	300,	0	-9.53	-8.65	4.99	1
chr6	30894024	30894235	57176	5e-11	+	30894024	30894235	0	1	211,	0	-10.3	-9.23	9.43	1
chr1	220987264	220987562	64757	1e-125	+	220987264	220987562	0	1	298,	0	-125	-123	6.72	1
chr11	8661876	8662057	9866	2.2e-06	-	8661876	8662057	0	1	181,	0	-5.65	-4.71	5.34	1
chr20	47752426	47768166	6780	0.0013	-	47752426	47768166	0	2	42,48,	0,15692	-2.87	-1.78	1.37	1
chr19	8439259	8441846	100507567	4e-14	-	8439259	8441846	0	2	233,1,	0,2586	-13.4	-12.4	6.96	1
chr16	90015138	90015891	54849	4e-13	+	90015138	90015891	0	2	84,67,	0,686	-12.4	-11.2	54.7	1
chr15	41047272	41047422	55177	0.0019	-	41047272	41047422	0	1	150,	0	-2.73	-2.15	10.7	1
chr20	33590804	33591074	26133	2e-31	-	33590804	33591074	0	1	270,	0	-30.7	-29.1	9.27	1
chr8	145648999	145649147	51160	6.3e-11	-	145648999	145649147	0	1	148,	0	-10.2	-9.1	3.29	1
chr6	31599040	31601314	7916	1.3e-54	+	31599040	31601314	0	2	1729,159,	0,2115	-53.9	-51.3	2.93	1
chr3	50225434	50226150	6405	1.3e-91	+	50225434	50226150	0	1	716,	0	-90.9	-89.3	50	1
chr8	146033783	146034173	340385	3e-06	+	146033783	146034173	0	1	390,	0	-5.52	-4.33	5.69	1
chr2	3523139	3523350	55256	5e-15	-	3523139	3523350	0	1	211,	0	-14.3	-13.1	7.16	1
chr13	37574826	37576433	11340	3.9e-08	+	37574826	37576433	0	3	133,53,24,	0,1059,1583	-7.41	-6.34	5.53	1
chr1	208417006	208417186	5362	0.00059	-	208417006	208417186	0	1	180,	0	-3.23	-2.59	4.91	1
chr2	227729334	227729814	84236	7.9e-85	+	227729334	227729814	0	1	480,	0	-84.1	-82.5	11.5	1
chr6	152650899	152652040	23345	1e-31	-	152650899	152652040	0	1	1141,	0	-31	-29.8	27.4	1
chr4	87622418	87622899	5783	1e-255	+	87622418	87622899	0	1	481,	0	-255	-253	11.5	1
chr19	52536736	52538053	9668	1.3e-51	-	52536736	52538053	0	1	1317,	0	-50.9	-49.5	14.8	1
chr2	27607668	27608655	5496	6.3e-44	-	27607668	27608655	0	2	287,42,	0,945	-43.2	-42	3.04	1
chr16	68331144	68331474	9057	5e-46	+	68331144	68331474	0	1	330,	0	-45.3	-43.9	5.69	1
chr12	26232345	26232496	11228	0.00069	+	26232345	26232496	0	1	151,	0	-3.16	-2.13	4.92	1
chr2	26568649	26569118	165082	2.2e-05	-	26568649	26569118	0	2	20,130,	0,339	-4.65	-3.72	7.81	1
chr17	35849950	35870047	11072	4.2e-08	+	35849950	35870047	0	2	114,67,	0,20030	-7.38	-6.5	5.55	1
chr19	2755215	2755483	6449	1.6e-16	-	2755215	2755483	0	1	268,	0	-15.8	-13.8	1.78	1
chr11	65325099	65325280	4054	8.3e-05	-	65325099	65325280	0	1	181,	0	-4.08	-3	3.22	1
chr15	83673513	83674319	123207	2e-60	-	83673513	83674319	0	1	806,	0	-59.7	-58.3	7.52	1
chr10	99474123	99475113	83742	2e-43	+	99474123	99475113	0	1	990,	0	-42.7	-40.3	2.89	1
chr16	84493251	84493849	9914	1.1e-06	+	84493251	84493849	0	1	598,	0	-5.97	-5.02	13.4	1
chr9	38392690	38395802	219	3.2e-13	+	38392690	38395802	0	2	114,66,	0,3046	-12.5	-11.5	7.88	1
chr14	65208888	65209098	26030	1.3e-14	+	65208888	65209098	0	1	210,	0	-13.9	-12.7	3.69	1
chr11	33308264	33308505	10114	7.2e-09	+	33308264	33308505	0	1	241,	0	-8.14	-6.53	2.8	1
chr5	179157769	179157890	821	0.00013	+	179157769	179157890	0	1	121,	0	-3.89	-2.92	7.62	1
chr5	71489716	71491544	4131	1e-182	+	71489716	71491544	0	1	1828,	0	-182	-179	9.32	1
chr18	48606922	48607192	4089	4.1e-08	+	48606922	48607192	0	1	270,	0	-7.39	-5.93	7.48	1
chr1	6662239	6662899	9903	1.3e-46	-	6662239	6662899	0	1	660,	0	-45.9	-44.1	139	1
chr16	27232013	27232910	79831	3.5e-09	+	27232013	27232910	0	1	897,	0	-8.46	-7.55	33.3	1
chr9	113168483	113174014	79987	1e-98	-	113168483	113174014	0	2	2748,672,	0,4859	-98	-96.3	96.4	1
chr2	70528539	70529220	84908	4.8e-05	-	70528539	70529220	0	2	196,164,	0,517	-4.32	-3.37	1.75	1
chr19	40946777	40948366	29946	1e-200	-	40946777	40948366	0	2	1216,133,	0,1456	-200	-198	74.7	1
chr20	32439892	32441574	128866	1e-26	+	32439892	32441574	0	2	117,273,	0,1409	-26	-23.8	1.63	1
chr16	10626350	10626681	2013	1e-215	-	10626350	10626681	0	1	331,	0	-215	-213	48.8	1
chr1	142713102	142713605	100874392	6.3e-49	-	142713102	142713605	0	1	503,	0	-48.2	-46.8	12.5	1
chr2	136630393	136633958	4175	5.1e-06	-	136630393	136633958	0	2	20,130,	0,3435	-5.29	-4.11	1.61	1
chr10	50310357	50310418	196740	0.0028	-	50310357	50310418	0	1	61,	0	-2.56	-1.63	11.3	1
chr3	69134119	69151005	10550	0.00089	+	69134119	69151005	0	2	255,16,	0,16870	-3.05	-2.44	8.03	1
chr4	103537623	103537862	4790	3.1e-07	+	103537623	103537862	0	1	239,	0	-6.51	-5.48	3.8	1
chr1	20008705	20009034	255104	5e-22	-	20008705	20009034	0	1	329,	0	-21.3	-20.2	14.3	1
chr21	34927234	34927505	6651	7.9e-11	+	34927234	34927505	0	1	271,	0	-10.1	-8.4	2.64	1
chr17	43224952	43225701	10614	1e-33	+	43224952	43225701	0	1	749,	0	-33	-31.8	22	1
chr18	65183782	65183962	643542	2.1e-08	+	65183782	65183962	0	1	180,	0	-7.68	-6.79	4.28	1
chr3	196669493	196670440	152217	0	+	196669493	196670440	0	1	947,	0	-534	#NAME?	47.9	1
chr7	151833658	151834079	58508	4e-26	-	151833658	151834079	0	1	421,	0	-25.4	-24.2	6.15	1
chr17	1703151	1703959	114826	6.3e-71	-	1703151	1703959	0	1	808,	0	-70.2	-68.6	22.7	1
chr3	56657002	56658536	23272	0	-	56657002	56658536	0	2	869,30,	0,1504	-510	#NAME?	11.6	1
chr1	1249131	1251564	54973	1.6e-28	-	1249131	1251564	0	6	354,65,139,35,99,28,	0,549,1072,1652,1768,2405	-27.8	-26.5	4.88	1
chr4	6709457	6711606	114932	1e-114	-	6709457	6711606	0	2	913,649,	0,1500	-114	-113	48.4	1
chr20	2945522	2955864	5786	1e-100	+	2945522	2955864	0	2	326,4,	0,10338	-100	-98.3	6.27	1
chr1	53152489	53164038	65260	0	-	53152489	53164038	0	3	1351,141,146,	0,5909,11403	-869	#NAME?	82	1
chr12	122825433	122831951	6249	4e-16	-	122825433	122831951	0	2	811,30,	0,6488	-15.4	-13.6	3.12	1
chr3	120049523	120049793	116064	2.7e-09	-	120049523	120049793	0	1	270,	0	-8.57	-7.71	1.98	1
chr1	39823102	39823553	23499	4e-80	+	39823102	39823553	0	1	451,	0	-79.4	-78	15.2	1
chr16	69729533	69730504	10725	1.6e-19	+	69729533	69730504	0	2	58,242,	0,729	-18.8	-17.7	8.63	1
chr15	28419757	28421630	8924	5.2e-08	-	28419757	28421630	0	3	9,145,57,	0,900,1816	-7.28	-6.32	8.36	1
chr1	94341873	94343070	30836	1e-211	-	94341873	94343070	0	1	1197,	0	-211	-209	13.2	1
chr19	5994097	5994605	5990	6.9e-08	-	5994097	5994605	0	1	508,	0	-7.16	-6.1	5.86	1
chr15	82444506	82444597	79631	3.9e-05	-	82444506	82444597	0	1	91,	0	-4.41	-3.49	4.08	1
chr12	109186113	109186443	54434	1e-48	-	109186113	109186443	0	1	330,	0	-48	-46.7	17.4	1
chr3	50355459	50355550	8692	0.00042	-	50355459	50355550	0	1	91,	0	-3.38	-2.66	1.75	1
chr1	35885092	35885781	9202	1e-261	+	35885092	35885781	0	1	689,	0	-261	-259	14.7	1
chr3	32022591	32022802	114884	3.7e-10	-	32022591	32022802	0	1	211,	0	-9.43	-7.93	4.56	1
chr22	30162909	30163000	55954	1.4e-05	-	30162909	30163000	0	1	91,	0	-4.86	-3.92	6.18	1
chrX	55033378	55034037	27301	2e-14	+	55033378	55034037	0	1	659,	0	-13.7	-11.8	2.01	1
chr19	42729896	42731245	116115	1e-195	+	42729896	42731245	0	1	1349,	0	-195	-193	57.7	1
chr3	9477490	9477581	55209	0.0014	+	9477490	9477581	0	1	91,	0	-2.86	-1.89	1.43	1
chr16	29912856	29913124	253982	6.3e-18	+	29912856	29913124	0	1	268,	0	-17.2	-16	4.1	1
chr2	109099611	109102311	9648	3.4e-09	+	109099611	109102311	0	4	11,163,101,25,	0,993,2480,2675	-8.47	-7.61	2.87	1
chr9	97849079	97849410	84909	1e-26	+	97849079	97849410	0	1	331,	0	-26	-24.6	12.6	1
chr12	113736179	113736329	53373	7.8e-05	+	113736179	113736329	0	1	150,	0	-4.11	-3.22	3.69	1
chr1	31342461	31342941	9672	4.1e-06	-	31342461	31342941	0	1	480,	0	-5.39	-4.16	1.79	1
chr7	5410102	5410883	84629	0	-	5410102	5410883	0	1	781,	0	-984	#NAME?	150	1
chr8	74894277	74894900	54968	1.3e-25	+	74894277	74894900	0	1	623,	0	-24.9	-23.8	36.3	1
chr14	105412882	105413362	113146	6.6e-06	-	105412882	105413362	0	1	480,	0	-5.18	-4.26	3.51	1
chr8	22432231	22432590	10174	6.3e-15	+	22432231	22432590	0	1	359,	0	-14.2	-12.5	1.97	1
chr1	145688117	145688328	27246	7.9e-18	+	145688117	145688328	0	1	211,	0	-17.1	-16.1	6.58	1
chr18	13731530	13731860	8731	1.3e-71	+	13731530	13731860	0	1	330,	0	-70.9	-69.5	10.3	1
chrX	41206917	41207218	1654	1e-196	+	41206917	41207218	0	1	301,	0	-196	-194	4.17	1
chr4	103183215	103183366	64116	3.2e-10	-	103183215	103183366	0	1	151,	0	-9.49	-8.61	2.36	1
chr8	145049525	145050913	5339	0.00011	-	145049525	145050913	0	2	18,43,	0,1345	-3.95	-3.07	3.1	1
chr12	48736447	48739174	121274	6.3e-70	-	48736447	48739174	0	3	1063,114,47,	0,1934,2680	-69.2	-67.6	65.4	1
chr14	58831841	58832238	5926	1.1e-05	+	58831841	58832238	0	2	177,3,	0,394	-4.96	-4.19	2.5	1
chr1	152005129	152005190	6282	0.0024	-	152005129	152005190	0	1	61,	0	-2.62	-2.06	2.29	1
chr15	42731350	42732010	64397	1e-109	-	42731350	42732010	0	1	660,	0	-109	-107	6.91	1
chr10	24908488	24910289	57584	1e-122	-	24908488	24910289	0	1	1801,	0	-122	-120	25.9	1
chr12	117298639	117305474	8739	7.9e-76	-	117298639	117305474	0	2	632,21,	0,6814	-75.1	-73.6	16.4	1
chr1	52497835	52499472	112970	1e-186	-	52497835	52499472	0	1	1637,	0	-186	-184	134	1
chr3	101396650	101397518	100009676	3.2e-21	+	101396650	101397518	0	1	868,	0	-20.5	-19.4	20.4	1
chr19	50167912	50168181	3661	5e-93	-	50167912	50168181	0	1	269,	0	-92.3	-90.8	15.9	1
chr7	142960521	142961641	373156	3e-06	+	142960521	142961641	0	3	157,82,1,	0,657,1119	-5.53	-4.55	3.12	1
chr19	11942193	11942582	126070	6.3e-13	+	11942193	11942582	0	1	389,	0	-12.2	-11.2	5.67	1
chr10	22610138	22610527	648	6.3e-16	+	22610138	22610527	0	1	389,	0	-15.2	-13.7	3.82	1
chr9	114393631	114393990	548645	1.7e-05	+	114393631	114393990	0	1	359,	0	-4.77	-3.83	5.21	1
chr3	191107317	191109636	152137	3.2e-13	+	191107317	191109636	0	2	74,107,	0,2212	-12.5	-11.5	3.86	1
chr15	80351939	80352298	54469	2.5e-30	+	80351939	80352298	0	2	212,27,	0,332	-29.6	-28	95.6	1
chr16	30785441	30785951	9810	5e-11	+	30785441	30785951	0	1	510,	0	-10.3	-8.84	3.31	1
chr14	76420886	76421126	23093	9.8e-07	+	76420886	76421126	0	1	240,	0	-6.01	-5.01	5.07	1
chr7	108155015	108158648	50640	6.3e-66	-	108155015	108158648	0	2	1003,15,	0,3618	-65.2	-63.7	13.2	1
chr6	56416988	56420596	667	1.6e-100	-	56416988	56420596	0	2	1465,454,	0,3154	-99.8	-98.1	16.3	1
chr10	75007936	75008263	23234	1.3e-48	-	75007936	75008263	0	1	327,	0	-47.9	-46.6	6.38	1
chr17	1565004	1565240	10594	0.00026	-	1565004	1565240	0	2	80,41,	0,195	-3.58	-2.9	6.02	1
chr12	108127208	108127388	11108	0.00019	-	108127208	108127388	0	1	180,	0	-3.71	-2.67	2.1	1
chr15	40759605	40759904	22893	1.2e-06	+	40759605	40759904	0	1	299,	0	-5.92	-4.49	2.41	1
chr15	42058272	42059652	23269	0	+	42058272	42059652	0	1	1380,	0	#NAME?	#NAME?	41.3	1
chr9	12775011	12821894	286343	1e-180	+	12775011	12821894	0	2	1015,510,	0,46373	-180	-178	103	1
chr11	119045248	119045729	79671	6.3e-19	+	119045248	119045729	0	1	481,	0	-18.2	-17.1	5.11	1
chr2	8869609	8869819	57498	7.2e-06	-	8869609	8869819	0	1	210,	0	-5.14	-4.36	2.33	1
chr3	121150931	121151262	10721	2.5e-12	-	121150931	121151262	0	1	331,	0	-11.6	-10.7	3.3	1
chr3	124826336	124826876	84561	1.7e-08	-	124826336	124826876	0	1	540,	0	-7.77	-6.88	9.81	1
chr19	1269846	1270259	148046	1e-216	-	1269846	1270259	0	1	413,	0	-216	-214	39.1	1
chr19	16663516	16676054	79939	0	-	16663516	16676054	0	3	1204,246,16,	0,2446,12522	-1100	#NAME?	94.4	1
chr16	89353293	89353654	29123	5e-11	-	89353293	89353654	0	1	361,	0	-10.3	-8.79	3.27	1
chr12	20833086	20833356	5139	3.2e-07	+	20833086	20833356	0	1	270,	0	-6.49	-5.67	20.1	1
chr15	77338599	77339256	10099	1e-117	-	77338599	77339256	0	1	657,	0	-117	-115	24	1
chr6	30002724	30003223	80862	1.2e-06	-	30002724	30003223	0	2	163,17,	0,482	-5.91	-5.11	2.67	1
chr1	35824537	35825285	9202	1e-302	+	35824537	35825285	0	2	510,89,	0,659	-302	-299	10.6	1
chr1	227842720	227843888	339500	1.6e-07	+	227842720	227843888	0	1	1168,	0	-6.8	-5.94	27.4	1
chr8	144939911	144947434	83481	0	-	144939911	144947434	0	1	7523,	0	-1480	#NAME?	105	1
chr5	175717852	175722226	375484	1.1e-08	+	175717852	175722226	0	2	106,194,	0,4180	-7.96	-7.11	4.59	1
chr14	80328033	80329144	9369	1.3e-96	+	80328033	80329144	0	1	1111,	0	-95.9	-94.1	15.1	1
chr6	39072978	39073459	55776	1e-15	-	39072978	39073459	0	1	481,	0	-15	-13.5	3.27	1
chr11	85955835	85956074	8726	1.3e-05	+	85955835	85956074	0	1	239,	0	-4.89	-3.7	4	1
chr4	7764368	7774672	60312	1e-299	-	7764368	7774672	0	3	1150,165,126,	0,6202,10178	-299	-297	26.2	1
chr19	41626335	41627506	1572	8.3e-06	+	41626335	41627506	0	2	66,144,	0,1027	-5.08	-4.16	6.41	1
chr21	45719924	45724219	5211	5.6e-06	+	45719924	45724219	0	2	149,62,	0,4233	-5.25	-4.07	1.68	1
chr4	113066552	113108021	132720	6.3e-30	+	113066552	113108021	0	2	337,173,	0,41296	-29.2	-27.4	10.8	1
chr17	2239689	2239840	55720	2.1e-08	-	2239689	2239840	0	1	151,	0	-7.68	-6.6	5.86	1
chr3	44496661	44497022	353274	1.3e-38	-	44496661	44497022	0	1	361,	0	-37.9	-36.6	5.86	1
chr5	54526980	54527514	10309	1e-129	-	54526980	54527514	0	1	534,	0	-129	-128	20.7	1
chr12	107379056	107379476	80298	4e-11	-	107379056	107379476	0	1	420,	0	-10.4	-9.5	5.64	1
chr10	103898946	103900896	23082	1e-132	+	103898946	103900896	0	1	1950,	0	-132	-129	350	1
chr5	665125	665305	11076	2.4e-06	-	665125	665305	0	1	180,	0	-5.62	-3.39	4.02	1
chr2	171822598	171823434	26003	2.5e-20	+	171822598	171823434	0	1	836,	0	-19.6	-18.5	8.33	1
chr10	120514037	120514488	143384	8.1e-09	-	120514037	120514488	0	1	451,	0	-8.09	-6.92	2.3	1
chr19	8503338	8503781	51257	4e-16	+	8503338	8503781	0	1	443,	0	-15.4	-13.7	3.73	1
chr17	42881293	42884796	10052	1e-234	-	42881293	42884796	0	2	1912,35,	0,3468	-234	-232	62.7	1
chr2	178482167	178483066	92104	3.2e-24	-	178482167	178483066	0	1	899,	0	-23.5	-22.4	43.9	1
chr12	120124763	120124944	11113	3.2e-05	-	120124763	120124944	0	1	181,	0	-4.5	-3.21	2.04	1
chr11	67195964	67196084	6199	8.9e-06	+	67195964	67196084	0	1	120,	0	-5.05	-3.76	2.32	1
chr1	227174376	227174527	56997	2.5e-11	+	227174376	227174527	0	1	151,	0	-10.6	-9.7	2.25	1
chr10	38406385	38408360	7587	1e-103	+	38406385	38408360	0	1	1975,	0	-103	-101	14.6	1
chr9	34369866	34370316	57462	9.5e-06	-	34369866	34370316	0	1	450,	0	-5.02	-4.22	11.9	1
chr15	69548133	69548584	26035	4.7e-09	+	69548133	69548584	0	1	451,	0	-8.33	-6.94	3.06	1
chr14	23767855	23768066	90673	3e-06	-	23767855	23768066	0	1	211,	0	-5.52	-4.73	2.52	1
chr17	19552063	19552243	224	2.5e-32	+	19552063	19552243	0	1	180,	0	-31.6	-30	16.6	1
chr11	8709652	8709863	6157	4e-13	+	8709652	8709863	0	1	211,	0	-12.4	-11.4	3.31	1
chr1	29474249	29474578	6429	1e-29	-	29474249	29474578	0	1	329,	0	-29	-27.8	3.56	1
chr4	52709305	52709766	23142	2.1e-05	+	52709305	52709766	0	2	128,22,	0,439	-4.67	-3.54	1.84	1
chr5	149676296	149678119	340075	4e-30	-	149676296	149678119	0	1	1823,	0	-29.4	-27.5	6.97	1
chr20	60756997	60757387	26039	1.3e-09	+	60756997	60757387	0	1	390,	0	-8.87	-7.96	8.33	1
chr11	130130755	130184278	29068	0	-	130130755	130184278	0	2	1069,9,	0,53514	-325	#NAME?	10.4	1
chr13	100153716	100153866	9375	4.2e-05	+	100153716	100153866	0	1	150,	0	-4.38	-3.47	3.21	1
chr7	42007243	42007423	2737	3.5e-10	-	42007243	42007423	0	1	180,	0	-9.46	-8.41	2.91	1
chr12	57910370	57910930	1649	1e-85	-	57910370	57910930	0	1	560,	0	-85	-83.4	9.54	1
chr11	93517704	93517885	9440	2e-05	+	93517704	93517885	0	1	181,	0	-4.69	-3.71	2.21	1
chr7	138946111	138946352	254048	2.1e-07	+	138946111	138946352	0	1	241,	0	-6.68	-5.82	10.7	1
chr1	229460542	229462825	126731	4e-44	-	229460542	229462825	0	2	616,341,	0,1942	-43.4	-42	68.4	1
chr20	2820858	2821009	64773	0.0002	-	2820858	2821009	0	1	151,	0	-3.69	-2.65	2.79	1
chr14	68264811	68265321	23503	6.3e-26	-	68264811	68265321	0	1	510,	0	-25.2	-24.1	6.09	1
chr14	76447045	76447225	7043	3.4e-05	-	76447045	76447225	0	1	180,	0	-4.47	-3.32	3.8	1
chr5	6756295	6757012	11044	2e-19	+	6756295	6757012	0	1	717,	0	-18.7	-17.6	6.27	1
chr12	56555276	56555336	4637	0.00013	+	56555276	56555336	0	1	60,	0	-3.88	-3	1.86	1
chr4	6303371	6303522	7466	0.00014	+	6303371	6303522	0	1	151,	0	-3.85	-3.09	5.95	1
chr9	37780571	37782003	51010	1e-150	-	37780571	37782003	0	2	306,21,	0,1411	-150	-148	4.94	1
chr12	29493667	29494686	51290	4e-24	-	29493667	29494686	0	2	484,20,	0,999	-23.4	-22.3	4.75	1
chr9	132657934	132658264	23048	3.2e-17	-	132657934	132658264	0	1	330,	0	-16.5	-15.5	13.9	1
chr12	124422180	124427303	80212	5.4e-07	-	124422180	124427303	0	2	197,13,	0,5110	-6.27	-5.46	3.87	1
chr9	35724622	35724878	7094	1.2e-05	-	35724622	35724878	0	2	99,52,	0,204	-4.93	-3.78	1.4	1
chr5	176395790	176396668	51720	6.3e-48	-	176395790	176396668	0	2	502,67,	0,811	-47.2	-45.8	7.39	1
chr15	63883284	63883613	9960	1.3e-57	+	63883284	63883613	0	1	329,	0	-56.9	-55.4	16.5	1
chr19	19292769	19293309	729991	2e-22	-	19292769	19293309	0	1	540,	0	-21.7	-20.6	6.12	1
chr4	123192252	123192643	84162	4.3e-07	+	123192252	123192643	0	1	391,	0	-6.37	-5.29	3.4	1
chr15	89859881	89860032	55215	0.0041	+	89859881	89860032	0	1	151,	0	-2.39	-1.86	8.7	1
chr14	88945457	88945668	11099	6.9e-08	-	88945457	88945668	0	1	211,	0	-7.16	-5.63	3.17	1
chr10	126677226	126681779	1488	0	-	126677226	126681779	0	3	1041,118,9,	0,4037,4544	-503	#NAME?	35.5	1
chr12	11324048	11324915	100129361	1e-152	+	11324048	11324915	0	1	867,	0	-152	-150	32.9	1
chr1	201751649	201752575	89796	2.5e-25	+	201751649	201752575	0	2	348,42,	0,884	-24.6	-23.5	12.4	1
chr11	43464982	43465073	55761	0.0006	+	43464982	43465073	0	1	91,	0	-3.22	-2.36	1.95	1
chr14	64518709	64520029	23224	1e-53	+	64518709	64520029	0	1	1320,	0	-53	-51.6	16.6	1
chr19	13888911	13889352	28974	1e-40	+	13888911	13889352	0	1	441,	0	-40	-38.3	6.83	1
chr14	69928537	69928957	55334	6.3e-15	+	69928537	69928957	0	1	420,	0	-14.2	-13.2	2.15	1
chr16	83948956	83949520	23417	4e-68	+	83948956	83949520	0	1	564,	0	-67.4	-66	13.5	1
chr17	2588430	2588640	5048	1.2e-05	+	2588430	2588640	0	1	210,	0	-4.92	-3.77	2.46	1
chr2	3502618	3502769	55256	2.6e-08	-	3502618	3502769	0	1	151,	0	-7.59	-6.52	4.1	1
chr12	7084826	7095891	10436	0	+	7084826	7095891	0	2	339,18,	0,11047	-358	#NAME?	55.7	1
chr9	38068131	38069210	6461	1.3e-57	-	38068131	38069210	0	1	1079,	0	-56.9	-55.2	11.1	1
chr19	53946554	53946764	147804	0.00013	+	53946554	53946764	0	1	210,	0	-3.88	-3.14	11.8	1
chr20	31436482	31436989	22919	2.5e-52	+	31436482	31436989	0	1	507,	0	-51.6	-50.2	2.36	1
chr15	80215618	80216393	283687	4e-37	+	80215618	80216393	0	1	775,	0	-36.4	-35.1	50.2	1
chr16	3074168	3074228	54985	0.0059	-	3074168	3074228	0	1	60,	0	-2.23	-1.72	3.68	1
chr17	73201715	73204687	79902	1.3e-15	+	73201715	73204687	0	2	174,66,	0,2906	-14.9	-13.6	7.42	1
chr2	74757098	74757577	27429	1.3e-22	+	74757098	74757577	0	1	479,	0	-21.9	-20.5	5.43	1
chr6	26413498	26414307	11119	5e-38	+	26413498	26414307	0	1	809,	0	-37.3	-36	9.78	1
chr19	58131538	58132977	7693	4e-32	+	58131538	58132977	0	1	1439,	0	-31.4	-30.2	15.4	1
chr10	99519707	99519858	118813	1.1e-05	+	99519707	99519858	0	1	151,	0	-4.95	-4.02	2.48	1
chr7	128694956	128695197	23534	4.5e-10	-	128694956	128695197	0	1	241,	0	-9.35	-8.47	11.2	1
chr11	64571373	64572607	4221	3e-07	-	64571373	64572607	0	2	915,102,	0,1132	-6.52	-5.26	1.9	1
chr19	14529840	14530195	10212	0.00017	-	14529840	14530195	0	2	66,114,	0,241	-3.76	-2.68	2.27	1
chr17	78293841	78294022	57674	0.0013	+	78293841	78294022	0	1	181,	0	-2.87	-2.18	3.57	1
chr2	201354701	201355031	130535	6.3e-33	-	201354701	201355031	0	1	330,	0	-32.2	-30.8	25.6	1
chr1	151314909	151315388	5993	1e-190	-	151314909	151315388	0	1	479,	0	-190	-188	17	1
chr12	70213303	70213693	117177	1.3e-13	+	70213303	70213693	0	1	390,	0	-12.9	-12	13.8	1
chr9	111696672	111696763	54942	0.00012	+	111696672	111696763	0	1	91,	0	-3.92	-3.04	19.5	1
chr6	30881649	30881829	2968	2.9e-06	+	30881649	30881829	0	1	180,	0	-5.54	-4.5	2.43	1
chr4	128840334	128840515	256471	7.8e-05	-	128840334	128840515	0	1	181,	0	-4.11	-2.95	8.24	1
chr15	91141831	91142101	64784	1.1e-07	+	91141831	91142101	0	1	270,	0	-6.96	-5.82	29.6	1
chr6	43192025	43192205	23113	0.00056	+	43192025	43192205	0	1	180,	0	-3.25	-2.47	2.9	1
chr8	81552373	81571854	619279	1.6e-31	-	81552373	81571854	0	3	1339,95,35,	0,2896,19446	-30.8	-29.6	77.3	1
chr3	171320705	171320946	5337	2.3e-09	-	171320705	171320946	0	1	241,	0	-8.64	-7.25	3.83	1
chr15	77405147	77426012	79834	1e-109	-	77405147	77426012	0	2	2514,666,	0,20199	-109	-107	69	1
chr11	65142662	65142961	283130	5.2e-08	-	65142662	65142961	0	1	299,	0	-7.28	-6.22	4.8	1
chr7	73954272	73959119	9569	0.0046	+	73954272	73959119	0	2	26,35,	0,4812	-2.34	-1.81	4.46	1
chr17	81052026	81052591	284207	0	+	81052026	81052591	0	1	565,	0	-1660	#NAME?	61.1	1
chr10	53458814	53459325	23283	1.3e-11	-	53458814	53459325	0	1	511,	0	-10.9	-9.44	2.24	1
chr12	56811351	56811955	8914	1.4e-08	-	56811351	56811955	0	3	219,102,38,	0,339,566	-7.86	-6.27	1.95	1
chr19	36213561	36214048	9757	0.0012	+	36213561	36214048	0	2	59,152,	0,335	-2.93	-2.33	11.4	1
chr16	2522269	2522567	4917	5e-07	+	2522269	2522567	0	1	298,	0	-6.3	-5.33	4.03	1
chr5	174905513	174905634	94081	1e-11	+	174905513	174905634	0	1	121,	0	-11	-9.85	8.46	1
chr15	69564093	69564304	26035	2.5e-13	+	69564093	69564304	0	1	211,	0	-12.6	-11.7	3.47	1
chr16	71683658	71683749	23035	0.00065	-	71683658	71683749	0	1	91,	0	-3.19	-2.18	2.36	1
chr5	148639220	148639641	22885	1e-15	+	148639220	148639641	0	1	421,	0	-15	-13.5	5.16	1
chr17	27493098	27493248	399687	0.00089	-	27493098	27493248	0	1	150,	0	-3.05	-1.98	2.58	1
chr17	40126471	40126562	1267	0.00024	+	40126471	40126562	0	1	91,	0	-3.62	-2.43	1.59	1
chr6	155153185	155154535	22828	1.6e-15	+	155153185	155154535	0	1	1350,	0	-14.8	-12.9	3.48	1
chr22	42981573	42981842	84271	1e-28	-	42981573	42981842	0	1	269,	0	-28	-26.5	7.96	1
chr8	97506000	97506390	6383	2e-19	+	97506000	97506390	0	1	390,	0	-18.7	-17.1	3.05	1
chr22	39898304	39900250	54471	2.9e-08	+	39898304	39900250	0	2	138,43,	0,1903	-7.54	-6.54	4.47	1
chrX	55032989	55033289	27301	5.1e-09	+	55032989	55033289	0	1	300,	0	-8.29	-6.92	1.98	1
chr19	53571155	53571396	90338	0.0001	-	53571155	53571396	0	1	241,	0	-3.98	-3.22	4.76	1
chrX	153715679	153719002	8273	1.000000e-317	-	153715679	153719002	0	2	1742,357,	0,2966	-317	-314	42.3	1
chr4	146435781	146461108	4086	7.9e-23	+	146435781	146461108	0	2	384,153,	0,25174	-22.1	-19.9	3.14	1
chr2	233201247	233201517	129563	3.7e-06	+	233201247	233201517	0	1	270,	0	-5.43	-4.46	5.21	1
chr10	12162918	12163518	55526	2e-100	+	12162918	12163518	0	1	600,	0	-99.7	-98	12.8	1
chr2	122096788	122096999	23332	7.6e-09	-	122096788	122096999	0	1	211,	0	-8.12	-7.21	3.27	1
chr22	31600953	31601578	91445	3.2e-10	+	31600953	31601578	0	1	625,	0	-9.49	-7.88	2.36	1
chr8	9414072	9432598	8658	0.0016	+	9414072	9432598	0	2	50,41,	0,18485	-2.8	-2	3.66	1
chr2	220101151	220101391	55139	1.6e-06	+	220101151	220101391	0	1	240,	0	-5.8	-4.8	4.77	1
chr9	96859791	96860870	138639	6.3e-60	+	96859791	96860870	0	1	1079,	0	-59.2	-57.7	10.7	1
chr4	186111772	186125122	57587	2e-52	-	186111772	186125122	0	2	594,184,	0,13166	-51.7	-50.3	32.1	1
chr8	146033003	146033514	340385	9.8e-06	+	146033003	146033514	0	1	511,	0	-5.01	-4.09	3.53	1
chr17	79869903	79870412	51547	6.3e-14	-	79869903	79870412	0	1	509,	0	-13.2	-12	39.5	1
chr8	27466471	27466592	1191	0.0014	-	27466471	27466592	0	1	121,	0	-2.84	-2.14	5.75	1
chr5	137500464	137500855	10902	3.2e-13	-	137500464	137500855	0	1	391,	0	-12.5	-11	2.43	1
chr1	200942434	200942615	23046	1.1e-07	-	200942434	200942615	0	1	181,	0	-6.95	-5.96	3.78	1
chr17	80572853	80573062	56270	0.003	-	80572853	80573062	0	1	209,	0	-2.53	-1.98	10	1
chr15	85147052	85147293	54993	1e-11	+	85147052	85147293	0	1	241,	0	-11	-9.99	4.78	1
chr9	129870200	129884895	23452	6.3e-15	-	129870200	129884895	0	2	859,302,	0,14393	-14.2	-12.5	2.96	1
chr1	42645053	42647624	22887	2.2e-09	-	42645053	42647624	0	2	443,37,	0,2534	-8.65	-7.01	2.07	1
chr12	53835432	53837219	54458	2e-30	+	53835432	53837219	0	3	152,39,45,	0,1046,1742	-29.7	-28.1	14.8	1
chr4	146681887	146682545	152485	6.3e-49	-	146681887	146682545	0	1	658,	0	-48.2	-46.6	104	1
chr19	45596460	45596669	284352	8.7e-08	+	45596460	45596669	0	1	209,	0	-7.06	-5.94	3.27	1
chr3	49027370	49027580	54681	6.9e-05	+	49027370	49027580	0	1	210,	0	-4.16	-3.28	3.12	1
chr2	86948154	86948245	100526767	0.0005	-	86948154	86948245	0	1	91,	0	-3.3	-2.44	3.23	1
chr16	11272424	11272994	23274	2e-32	+	11272424	11272994	0	1	570,	0	-31.7	-30.3	7.78	1
chr1	156262477	156262866	112770	4e-12	-	156262477	156262866	0	1	389,	0	-11.4	-10.2	5.86	1
chr18	29205386	29205627	9331	2.1e-05	-	29205386	29205627	0	1	241,	0	-4.67	-3.7	4.44	1
chr1	66838045	66838555	5142	2.9e-08	+	66838045	66838555	0	1	510,	0	-7.54	-6.7	23	1
chr1	151288075	151297295	5298	4e-39	-	151288075	151297295	0	2	910,75,	0,9145	-38.4	-36.4	3.77	1
chr8	17422501	17422802	6542	5e-40	+	17422501	17422802	0	1	301,	0	-39.3	-38	6.17	1
chr12	89984215	89993019	490	1e-205	-	89984215	89993019	0	3	857,154,126,	0,8151,8678	-205	-203	41.5	1
chr2	131673924	131674554	50649	0	+	131673924	131674554	0	1	630,	0	-424	#NAME?	178	1
chr13	23911775	23913964	26278	6.3e-67	-	23911775	23913964	0	1	2189,	0	-66.2	-64.7	99.9	1
chr19	15464990	15465351	10270	1.6e-18	-	15464990	15465351	0	1	361,	0	-17.8	-16.8	4.65	1
chr6	84862286	84862855	22832	2.5e-44	-	84862286	84862855	0	1	569,	0	-43.6	-42.3	16.2	1
chr12	112277661	112279193	51275	2.5e-10	-	112277661	112279193	0	2	620,63,	0,1469	-9.61	-8.1	3.11	1
chr1	27651645	27651884	644961	1.3e-14	+	27651645	27651884	0	1	239,	0	-13.9	-12.5	2.81	1
chr19	58370617	58371547	84914	4e-12	+	58370617	58371547	0	1	930,	0	-11.4	-10.4	23.8	1
chr17	2291176	2291296	4335	2.8e-10	-	2291176	2291296	0	1	120,	0	-9.56	-8.5	2.5	1
chr1	10522238	10522388	1676	0.0012	-	10522238	10522388	0	1	150,	0	-2.91	-1.81	3.37	1
chr3	38455807	38456467	9942	3.2e-36	+	38455807	38456467	0	1	660,	0	-35.5	-34.3	28.5	1
chr2	23980353	23980894	54454	2e-39	-	23980353	23980894	0	1	541,	0	-38.7	-37.4	7.25	1
chr18	65177380	65183967	92126	1e-291	-	65177380	65183967	0	2	5349,370,	0,6217	-291	-289	259	1
chr11	62369072	62369282	9219	2.1e-07	-	62369072	62369282	0	1	210,	0	-6.68	-5.19	1.84	1
chr20	25456915	25457365	22981	2e-26	-	25456915	25457365	0	1	450,	0	-25.7	-24.4	9.26	1
chr19	35176111	35176499	55900	5e-26	+	35176111	35176499	0	1	388,	0	-25.3	-24.2	3.4	1
chr17	40811295	40811476	27175	8.5e-05	+	40811295	40811476	0	1	181,	0	-4.07	-3.18	5.21	1
chr6	32945913	32946094	6046	7.9e-11	+	32945913	32946094	0	1	181,	0	-10.1	-9.17	1.7	1
chr1	15819179	15819540	842	5e-62	-	15819179	15819540	0	1	361,	0	-61.3	-59.4	15.5	1
chr7	94184864	94185313	64921	2e-37	+	94184864	94185313	0	1	449,	0	-36.7	-35.5	10.6	1
chrX	57619104	57620388	158586	1e-124	+	57619104	57620388	0	1	1284,	0	-124	-122	70.2	1
chr12	57453577	57453817	23306	4.6e-09	-	57453577	57453817	0	1	240,	0	-8.34	-7.24	6.94	1
chr6	17615895	17616811	9972	3.2e-54	-	17615895	17616811	0	2	517,54,	0,862	-53.5	-52.1	12.9	1
chr5	109025334	109025454	4124	0.001	+	109025334	109025454	0	1	120,	0	-3	-2.15	5.44	1
chr12	123717962	123718142	91574	1.9e-06	+	123717962	123718142	0	1	180,	0	-5.73	-4.9	4.76	1
chr3	15085266	15085597	7182	7.9e-29	+	15085266	15085597	0	1	331,	0	-28.1	-26.9	4.09	1
chr13	67798986	67804468	5101	1.000000e-312	-	67798986	67804468	0	2	3721,557,	0,4925	-312	-309	18.9	1
chr17	80349296	80350164	79701	5e-41	-	80349296	80350164	0	1	868,	0	-40.3	-38.3	5.63	1
chr16	72058057	72058507	1723	6.3e-24	+	72058057	72058507	0	1	450,	0	-23.2	-21.8	25.4	1
chr8	64098767	64122562	253943	5e-52	+	64098767	64122562	0	2	1536,322,	0,23473	-51.3	-48.8	4.02	1
chr20	18364966	18365176	55184	1.3e-07	-	18364966	18365176	0	1	210,	0	-6.87	-6.04	11.2	1
chr21	9908088	9908299	100132288	1.3e-05	-	9908088	9908299	0	1	211,	0	-4.87	-3.72	6.57	1
chr16	1988233	1988472	51734	1.9e-06	-	1988233	1988472	0	1	239,	0	-5.73	-4.9	15.5	1
chr2	29169523	29170362	23160	1e-189	+	29169523	29170362	0	1	839,	0	-189	-187	41	1
chr22	46631091	46631690	5465	2.3e-06	+	46631091	46631690	0	1	599,	0	-5.64	-4.6	5.65	1
chr14	91338365	91338606	9252	9.8e-07	-	91338365	91338606	0	1	241,	0	-6.01	-5.21	3.44	1
chr9	37861156	37861517	79269	1e-301	+	37861156	37861517	0	1	361,	0	-301	-299	66.7	1
chr14	105362389	105362569	283638	4.8e-07	+	105362389	105362569	0	1	180,	0	-6.32	-5.35	2.07	1
chr16	739533	740042	84219	1e-290	-	739533	740042	0	1	509,	0	-290	-288	135	1
chr7	6063490	6063551	27102	0.00014	-	6063490	6063551	0	1	61,	0	-3.85	-2.98	3.35	1
chr11	77033988	77034379	5058	1e-74	-	77033988	77034379	0	1	391,	0	-74	-72.5	7.6	1
chr17	45012403	45012583	9570	7.9e-05	+	45012403	45012583	0	1	180,	0	-4.1	-3.02	1.77	1
chr17	36830648	36831038	100170841	1e-13	-	36830648	36831038	0	1	390,	0	-13	-12	3.51	1
chr10	81586134	81586642	642361	7.9e-16	+	81586134	81586642	0	1	508,	0	-15.1	-14.2	16.6	1
chr14	32560567	32560748	394	2.3e-05	+	32560567	32560748	0	1	181,	0	-4.64	-3.67	4.77	1
chr1	23519491	23521222	3352	1e-104	-	23519491	23521222	0	1	1731,	0	-104	-102	55.9	1
chr12	113827248	113827458	196463	1.6e-12	+	113827248	113827458	0	1	210,	0	-11.8	-10.1	2.95	1
chr19	58352387	58361255	84914	1.3e-06	+	58352387	58361255	0	2	136,75,	0,8793	-5.88	-5.02	8.47	1
chr14	55529812	55531582	93487	3.2e-45	+	55529812	55531582	0	2	231,249,	0,1521	-44.5	-42.8	7.29	1
chr12	48174009	48174277	55652	1e-138	+	48174009	48174277	0	1	268,	0	-138	-136	18.2	1
chr7	99170488	99171864	79027	1e-116	+	99170488	99171864	0	1	1376,	0	-116	-114	6.96	1
chr2	178084185	178084426	220988	1e-82	+	178084185	178084426	0	1	241,	0	-82	-80.4	10.8	1
chr16	15781244	15785116	54820	1.6e-24	+	15781244	15785116	0	2	124,116,	0,3756	-23.8	-22.6	7.16	1
chr6	32121259	32121603	100507547	7.8e-09	-	32121259	32121603	0	2	177,90,	0,254	-8.11	-7.02	5.69	1
chr1	41012523	41012973	127396	3.4e-07	+	41012523	41012973	0	1	450,	0	-6.47	-5.62	26.2	1
chr6	151054819	151089785	57480	3.2e-18	+	151054819	151089785	0	2	409,12,	0,34954	-17.5	-16.5	6.65	1
chr5	106763047	106763137	1946	0.002	-	106763047	106763137	0	1	90,	0	-2.69	-2	2.88	1
chr16	89736566	89736836	124045	5.4e-07	+	89736566	89736836	0	1	270,	0	-6.27	-5.25	6.69	1
chr18	32870295	32870476	10778	0.00014	+	32870295	32870476	0	1	181,	0	-3.85	-2.76	3.08	1
chr3	127291996	127292447	131601	5e-39	-	127291996	127292447	0	1	451,	0	-38.3	-36.8	6.66	1
chr7	43671056	43678864	55744	1e-115	-	43671056	43678864	0	2	1951,19,	0,7789	-115	-113	35.9	1
chr11	65421721	65422139	5970	1e-22	-	65421721	65422139	0	1	418,	0	-22	-20.1	2.2	1
chr15	76225040	76225130	26263	0.00065	+	76225040	76225130	0	1	90,	0	-3.19	-2.33	1.38	1
chr12	49425121	49425901	8085	7.9e-51	-	49425121	49425901	0	1	780,	0	-50.1	-48.6	7.76	1
chr4	6878421	6882691	9778	5.5e-06	+	6878421	6882691	0	2	63,178,	0,4092	-5.26	-4.44	9.12	1
chr14	64469482	64473795	23224	7.9e-46	+	64469482	64473795	0	2	566,35,	0,4278	-45.1	-43.7	9.17	1
chr13	99336531	99336830	6564	1.3e-06	-	99336531	99336830	0	1	299,	0	-5.87	-4.54	12.6	1
chr6	15246250	15246461	3720	5.2e-07	+	15246250	15246461	0	1	211,	0	-6.28	-5.47	13.6	1
chr14	50234816	50235024	23588	7.9e-13	+	50234816	50235024	0	1	208,	0	-12.1	-11	7.62	1
chr7	99808789	99811361	10734	1.9e-06	+	99808789	99811361	0	4	19,105,82,4,	0,268,628,2568	-5.72	-4.73	4.79	1
chr5	98128788	98129477	285704	1e-305	+	98128788	98129477	0	1	689,	0	-305	-303	43.2	1
chr2	242664492	242665212	84289	1e-32	+	242664492	242665212	0	1	720,	0	-32	-30.4	100	1
chr2	128603869	128615699	5433	1e-154	-	128603869	128615699	0	4	1890,96,181,98,	0,4294,6629,11732	-154	-152	48.1	1
chr11	64851693	64851843	7542	1.9e-06	+	64851693	64851843	0	1	150,	0	-5.71	-4.77	2.8	1
chr7	36456762	36459835	54443	1.9e-07	+	36456762	36459835	0	3	37,236,58,	0,2090,3015	-6.71	-5.31	3.47	1
chr5	175774255	175774993	57179	2e-22	-	175774255	175774993	0	2	556,70,	0,668	-21.7	-19.5	2.69	1
chr10	112270023	112270945	1847	2e-28	+	112270023	112270945	0	1	922,	0	-27.7	-25.6	3.45	1
chr12	109973492	109974301	89910	0.00011	+	109973492	109974301	0	1	809,	0	-3.94	-2.88	2.91	1
chr11	65655860	65656010	9158	1e-07	-	65655860	65656010	0	1	150,	0	-6.98	-5.93	5.86	1
chr17	18231844	18232084	6470	6.3e-11	-	18231844	18232084	0	1	240,	0	-10.2	-9.34	3.01	1
chr1	108678962	108686177	29957	1.3e-63	-	108678962	108686177	0	3	497,151,13,	0,2717,7202	-62.9	-61.4	38.1	1
chr15	44063338	44063638	2923	1e-32	+	44063338	44063638	0	1	300,	0	-32	-29.6	1.77	1
chr8	160732	161360	644128	2e-16	-	160732	161360	0	1	628,	0	-15.7	-14.7	5.21	1
chr4	53458506	53458747	64854	2.1e-07	-	53458506	53458747	0	1	241,	0	-6.68	-5.28	3.54	1
chr1	26900623	26901221	6195	1e-107	+	26900623	26901221	0	1	598,	0	-107	-105	192	1
chr11	76061033	76072079	5612	0	-	76061033	76072079	0	3	2805,37,80,	0,5628,10966	-378	#NAME?	13.6	1
chr10	121334206	121336196	7073	1e-78	-	121334206	121336196	0	2	1097,74,	0,1916	-78	-76.4	73.8	1
chr7	139877268	139877983	100134229	2e-38	+	139877268	139877983	0	1	715,	0	-37.7	-36.5	58.3	1
chr1	2521021	2521172	127281	9.5e-05	+	2521021	2521172	0	1	151,	0	-4.02	-2.94	1.7	1
chr12	70150244	70172765	117177	7.9e-13	+	70150244	70172765	0	2	199,12,	0,22509	-12.1	-11.2	2.68	1
chr17	68172019	68172110	3759	0.0058	+	68172019	68172110	0	1	91,	0	-2.24	-1.57	8.11	1
chr7	102240722	102240813	10156	0.00038	-	102240722	102240813	0	1	91,	0	-3.42	-2.3	2.07	1
chrX	8500714	8502488	3730	2.5e-18	-	8500714	8502488	0	2	380,129,	0,1645	-17.6	-15.8	3.78	1
chr5	179193333	179195861	9794	1e-146	+	179193333	179195861	0	2	409,11,	0,2517	-146	-143	58.4	1
chr1	183895305	183895665	23179	6.9e-08	+	183895305	183895665	0	1	360,	0	-7.16	-6.03	11.5	1
chr1	57169653	57173245	5563	2e-59	+	57169653	57173245	0	3	495,127,98,	0,2111,3494	-58.7	-57.3	4.41	1
chr16	71883770	71885690	342371	5e-33	+	71883770	71885690	0	1	1920,	0	-32.3	-29.9	4.87	1
chr13	114138174	114145023	55208	7.9e-13	-	114138174	114145023	0	2	197,42,	0,6807	-12.1	-11	6.64	1
chr6	90573018	90573169	9994	0.00026	+	90573018	90573169	0	1	151,	0	-3.58	-2.84	5.65	1
chr17	2282730	2282851	9905	0.00074	+	2282730	2282851	0	1	121,	0	-3.13	-2.51	12	1
chr4	95586352	95586652	10611	2.8e-07	+	95586352	95586652	0	1	300,	0	-6.56	-5.17	5.57	1
chr3	66430446	66431161	26018	4e-34	-	66430446	66431161	0	2	467,161,	0,554	-33.4	-32.2	8.87	1
chr1	32373970	32374151	8073	4.1e-06	-	32373970	32374151	0	1	181,	0	-5.39	-4.57	3.27	1
chr17	80200536	80203871	1453	1e-149	-	80200536	80203871	0	2	2171,20,	0,3315	-149	-147	16.7	1
chr14	53510110	53510381	80821	1.6e-12	-	53510110	53510381	0	1	271,	0	-11.8	-10.9	12.6	1
chr3	12938721	12938992	9922	1.3e-16	-	12938721	12938992	0	1	271,	0	-15.9	-14.9	11.3	1
chr4	77677776	77678047	57619	3.7e-07	+	77677776	77678047	0	1	271,	0	-6.43	-5.55	3.47	1
chr21	43221144	43221745	63977	1e-275	-	43221144	43221745	0	1	601,	0	-275	-272	33.1	1
chr3	107491897	107493609	56987	1e-136	+	107491897	107493609	0	2	586,44,	0,1668	-136	-134	15.2	1
chr19	19618904	19619711	54815	3.2e-27	+	19618904	19619711	0	1	807,	0	-26.5	-25.3	27.4	1
chr5	64064346	64064496	285672	0.00022	-	64064346	64064496	0	1	150,	0	-3.66	-2.81	5.61	1
chr2	55786012	55786102	57223	0.00023	-	55786012	55786102	0	1	90,	0	-3.64	-2.91	1.7	1
chr17	7125577	7125786	37	6.3e-26	+	7125577	7125786	0	1	209,	0	-25.2	-24.1	6.55	1
chr11	65658841	65659077	11007	6.3e-11	+	65658841	65659077	0	1	236,	0	-10.2	-8.48	1.77	1
chr11	10800242	10800692	9646	1e-102	+	10800242	10800692	0	1	450,	0	-102	-101	5.9	1
chr6	5368940	5369389	10667	1e-81	+	5368940	5369389	0	1	449,	0	-81	-78.9	126	1
chr1	208417275	208417575	5362	7.1e-05	-	208417275	208417575	0	1	300,	0	-4.15	-3.4	5.03	1
chr11	130747527	130747827	399979	1.7e-07	-	130747527	130747827	0	1	300,	0	-6.78	-5.8	5.99	1
chr13	42873516	42874146	11215	5e-71	+	42873516	42874146	0	1	630,	0	-70.3	-68.7	6.7	1
chr19	53959602	53960081	388561	3.2e-35	+	53959602	53960081	0	1	479,	0	-34.5	-33.3	11.6	1
chr17	17396089	17396534	55090	6.3e-29	+	17396089	17396534	0	1	445,	0	-28.2	-27	4.66	1
chr1	178435080	178436472	9462	0.00017	+	178435080	178436472	0	2	177,4,	0,1388	-3.76	-2.71	1.95	1
chr10	61548624	61549163	8030	1e-220	-	61548624	61549163	0	1	539,	0	-220	-218	60.5	1
chr9	126144268	126144718	57706	1e-28	-	126144268	126144718	0	1	450,	0	-28	-26.6	6.07	1
chr1	154573596	154578531	103	0	-	154573596	154578531	0	2	1506,52,	0,4883	-625	#NAME?	13.1	1
chr3	38565427	38565938	9941	1e-166	+	38565427	38565938	0	1	511,	0	-166	-164	14.2	1
chr13	75860693	75863081	9882	1e-172	-	75860693	75863081	0	2	468,12,	0,2376	-172	-170	15.9	1
chr15	52017084	52029551	256586	6.6e-08	-	52017084	52029551	0	2	234,5,	0,12462	-7.18	-6.34	6.01	1
chr10	115922363	115923054	55088	1.3e-88	-	115922363	115923054	0	1	691,	0	-87.9	-86.3	14.2	1
chr4	154525005	154525575	23240	1.3e-65	+	154525005	154525575	0	1	570,	0	-64.9	-63.4	13.1	1
chr19	41766268	41766418	558	6.2e-08	+	41766268	41766418	0	1	150,	0	-7.21	-5.89	3.46	1
chr19	7694699	7696131	100131801	2.2e-06	+	7694699	7696131	0	4	47,87,24,14,	0,759,1009,1418	-5.65	-4.45	1.54	1
chr12	57106240	57106896	4666	5e-21	-	57106240	57106896	0	3	96,123,51,	0,329,605	-20.3	-18.3	10.4	1
chr5	132269904	132270595	27125	1.6e-19	-	132269904	132270595	0	1	691,	0	-18.8	-16.9	3.5	1
chr15	44719758	44719969	51496	2e-11	+	44719758	44719969	0	1	211,	0	-10.7	-9.5	5.51	1
chr7	5352340	5355617	84629	2.5e-17	-	5352340	5355617	0	3	1154,165,31,	0,2274,3246	-16.6	-15.1	4.18	1
chr18	48573303	48573603	4089	4e-30	+	48573303	48573603	0	1	300,	0	-29.4	-28.2	7.54	1
chr11	203878	204118	51272	2.6e-06	-	203878	204118	0	1	240,	0	-5.59	-4.35	1.73	1
chr4	111119432	111119820	79071	5.5e-09	-	111119432	111119820	0	1	388,	0	-8.26	-7.08	3.71	1
chr17	7293406	7293587	57048	8.9e-06	-	7293406	7293587	0	1	181,	0	-5.05	-4.04	1.47	1
chr7	64168977	64170055	51427	3.2e-53	+	64168977	64170055	0	1	1078,	0	-52.5	-51.1	24.3	1
chr11	62439452	62439993	790955	0	+	62439452	62439993	0	1	541,	0	-346	#NAME?	16.5	1
chrX	17743588	17743649	4810	0.0035	+	17743588	17743649	0	1	61,	0	-2.46	-1.44	4.42	1
chr12	57395944	57396185	9880	4.2e-08	-	57395944	57396185	0	1	241,	0	-7.38	-6.54	3.57	1
chr12	12334084	12334205	4040	1.9e-05	-	12334084	12334205	0	1	121,	0	-4.73	-3.41	2.79	1
chr12	110765604	110765814	488	1e-09	+	110765604	110765814	0	1	210,	0	-8.99	-7.96	3.76	1
chr14	86089101	86089520	23768	7.9e-11	+	86089101	86089520	0	1	419,	0	-10.1	-9.2	21.4	1
chr21	34918631	34921788	6651	0.00054	+	34918631	34921788	0	2	54,7,	0,3150	-3.27	-2.35	4.2	1
chr19	11032404	11032673	10498	3.2e-05	+	11032404	11032673	0	1	269,	0	-4.5	-3.26	1.59	1
chr10	124713648	124713799	80007	0.00018	-	124713648	124713799	0	1	151,	0	-3.75	-2.89	5.21	1
chr19	40876018	40877634	23646	4e-24	+	40876018	40877634	0	2	126,55,	0,1561	-23.4	-22.2	3.37	1
chr19	6531068	6531218	8744	1.4e-05	+	6531068	6531218	0	1	150,	0	-4.84	-3.52	8.64	1
chr7	143548700	143549030	9747	3.2e-28	-	143548700	143549030	0	1	330,	0	-27.5	-26.3	2.9	1
chr17	17090382	17092482	23164	1e-135	+	17090382	17092482	0	1	2100,	0	-135	-133	28.6	1
chr21	33984618	33984918	56683	4.3e-10	-	33984618	33984918	0	1	300,	0	-9.37	-8.24	42.9	1
chr1	24113778	24114074	57095	1.7e-08	+	24113778	24114074	0	1	296,	0	-7.77	-6.79	26.8	1
chr15	77473883	77473944	79834	0.0012	-	77473883	77473944	0	1	61,	0	-2.91	-2.09	2.61	1
chr2	25042256	25043841	79172	1e-124	+	25042256	25043841	0	1	1585,	0	-124	-122	16.1	1
chr19	18109244	18109454	3780	0.00015	+	18109244	18109454	0	1	210,	0	-3.83	-2.92	3	1
chr16	3023245	3023485	124222	5e-18	+	3023245	3023485	0	1	240,	0	-17.3	-16.3	6.49	1
chr1	185280260	185280441	10625	2.1e-05	-	185280260	185280441	0	1	181,	0	-4.67	-3.65	4.83	1
chr7	99016516	99022565	100526740	1e-156	-	99016516	99022565	0	3	1256,183,148,	0,4881,5901	-156	-154	21.7	1
chr18	18690823	18690914	6093	0.00014	-	18690823	18690914	0	1	91,	0	-3.85	-3.11	1.49	1
chr12	1136933	1137443	23085	4e-21	+	1136933	1137443	0	1	510,	0	-20.4	-18.8	41.3	1
chr1	165667660	165667870	223	1.6e-16	-	165667660	165667870	0	1	210,	0	-15.8	-14.5	12.7	1
chr12	42481068	42491251	283464	1.6e-14	-	42481068	42491251	0	2	681,8,	0,10175	-13.8	-11.9	2.62	1
chr8	92090626	92090807	51633	0.00012	+	92090626	92090807	0	1	181,	0	-3.92	-2.82	1.96	1
chr5	43161488	43161638	7690	0.00044	+	43161488	43161638	0	1	150,	0	-3.36	-2.24	1.59	1
chr10	16633661	16634140	6251	2.5e-16	-	16633661	16634140	0	1	479,	0	-15.6	-14.6	7.06	1
chr21	43305278	43305758	25966	3.8e-09	-	43305278	43305758	0	1	480,	0	-8.42	-7.39	7.02	1
chr20	35380492	35380761	79980	2.1e-06	-	35380492	35380761	0	1	269,	0	-5.67	-4.46	1.71	1
chr20	34637329	34638882	647979	0	-	34637329	34638882	0	1	1553,	0	-478	#NAME?	30.1	1
chr10	27128663	27149896	10006	3.2e-08	-	27128663	27149896	0	2	49,221,	0,21012	-7.49	-6.17	1.66	1
chr6	7882888	7884610	100526836	1.6e-92	-	7882888	7884610	0	2	611,19,	0,1703	-91.8	-90.1	8.81	1
chr3	113377039	113377220	205717	6.9e-07	-	113377039	113377220	0	1	181,	0	-6.16	-5.29	3.09	1
chr11	86656746	86657076	8322	6.3e-27	-	86656746	86657076	0	1	330,	0	-26.2	-25	7.57	1
chr16	2680195	2680405	652276	0.00021	+	2680195	2680405	0	1	210,	0	-3.68	-2.61	5.13	1
chr17	72832090	72832629	54868	4e-27	+	72832090	72832629	0	1	539,	0	-26.4	-24.4	2.96	1
chr1	112998605	113000851	55917	6.3e-67	+	112998605	113000851	0	1	2246,	0	-66.2	-64.7	15.3	1
chr19	1273601	1274051	1153	7.9e-18	+	1273601	1274051	0	1	450,	0	-17.1	-16	3.68	1
chr17	7217249	7217401	2874	6.8e-05	-	7217249	7217401	0	2	58,3,	0,149	-4.17	-3.25	1.86	1
chr15	66789998	66790146	10302	0.00018	-	66789998	66790146	0	1	148,	0	-3.74	-2.87	5.72	1
chr16	84211811	84213610	9013	1e-188	-	84211811	84213610	0	2	1646,59,	0,1740	-188	-185	281	1
chr1	52485833	52486074	51060	3.2e-13	-	52485833	52486074	0	1	241,	0	-12.5	-11.4	8.71	1
chr10	14938860	14939487	79723	2e-14	+	14938860	14939487	0	1	627,	0	-13.7	-11.9	3.25	1
chr19	3611135	3613066	58509	3.2e-42	-	3611135	3613066	0	2	1276,11,	0,1920	-41.5	-39.8	129	1
chr11	61170537	61178502	79869	1e-235	-	61170537	61178502	0	2	1639,93,	0,7872	-235	-233	15.2	1
chr7	30410977	30412410	222161	3.2e-65	+	30410977	30412410	0	1	1433,	0	-64.5	-63	32.1	1
chr16	11785400	11785699	51061	6.8e-05	-	11785400	11785699	0	1	299,	0	-4.17	-2.91	2.28	1
chr20	39988922	39989073	64900	0.0044	+	39988922	39989073	0	1	151,	0	-2.36	-1.61	4.66	1
chr15	75134544	75134723	25989	1.3e-16	-	75134544	75134723	0	1	179,	0	-15.9	-14.8	3.77	1
chr7	30603480	30603690	401320	5e-05	-	30603480	30603690	0	1	210,	0	-4.3	-3.55	11	1
chr14	75537399	75538319	79696	2.3e-08	+	75537399	75538319	0	1	920,	0	-7.63	-6.79	23.3	1
chr7	90893782	90894563	8321	2.8e-08	+	90893782	90894563	0	1	781,	0	-7.56	-6.42	22.6	1
chr8	62577804	62580821	444	2e-27	-	62577804	62580821	0	2	361,29,	0,2988	-26.7	-25.6	11.1	1
chr19	9921895	9922194	54850	1.3e-34	-	9921895	9922194	0	1	299,	0	-33.9	-32.4	9.56	1
chr16	30930639	30931298	283932	4e-34	-	30930639	30931298	0	1	659,	0	-33.4	-32.2	22.8	1
chr11	94865097	94865815	23052	5e-72	+	94865097	94865815	0	1	718,	0	-71.3	-69.8	16.9	1
chr12	57923631	57923841	114785	2.2e-08	+	57923631	57923841	0	1	210,	0	-7.65	-6.57	3.71	1
chr12	50231821	50236912	144233	1.6e-53	-	50231821	50236912	0	2	977,276,	0,4815	-52.8	-51.4	47.6	1
chr16	88599221	88599909	161882	8.3e-06	+	88599221	88599909	0	2	122,354,	0,334	-5.08	-4.07	11.8	1
chr18	67956196	67981446	9306	8.3e-05	+	67956196	67981446	0	2	130,20,	0,25230	-4.08	-3.19	4.34	1
chr10	106073105	106075381	85450	1e-273	-	106073105	106075381	0	1	2276,	0	-273	-271	33.1	1
chr19	30165338	30166353	79156	3.2e-46	+	30165338	30166353	0	1	1015,	0	-45.5	-44.2	62.8	1
chr17	48172744	48172804	5164	0.0013	+	48172744	48172804	0	1	60,	0	-2.89	-2.09	3.19	1
chr1	89447920	89454021	494115	2e-46	-	89447920	89454021	0	2	1829,87,	0,6014	-45.7	-44.3	28.8	1
chr9	137328322	137329253	6256	1.6e-84	+	137328322	137329253	0	1	931,	0	-83.8	-81.8	29	1
chr1	1258653	1260067	54973	2.6e-08	-	1258653	1260067	0	2	14,107,	0,1307	-7.59	-6.52	7.48	1
chr1	149576261	149576500	728855	3e-07	+	149576261	149576500	0	1	239,	0	-6.53	-5.43	4.3	1
chr10	69672605	69676468	23411	1.6e-15	+	69672605	69676468	0	2	183,447,	0,3416	-14.8	-13.3	4.43	1
chr1	117119716	117122056	3321	1e-12	-	117119716	117122056	0	2	468,43,	0,2297	-12	-10.5	3.45	1
chr7	92087261	92087471	57798	7.4e-08	+	92087261	92087471	0	1	210,	0	-7.13	-5.69	6.77	1
chr1	154554563	154554803	103	2e-26	-	154554563	154554803	0	1	240,	0	-25.7	-24.5	13.4	1
chr19	5244212	5273114	5802	2e-18	-	5244212	5273114	0	8	281,270,12,111,18,9,189,40,	0,1574,11906,13815,16603,18762,20806,28862	-17.7	-16.4	19.4	1
chr2	208628238	208628389	7855	2.1e-06	-	208628238	208628389	0	1	151,	0	-5.67	-4.87	2.6	1
chr3	9791956	9792106	4968	3.4e-05	+	9791956	9792106	0	1	150,	0	-4.47	-3.55	3.51	1
chr1	243354412	243354682	9859	4e-15	-	243354412	243354682	0	1	270,	0	-14.4	-13.3	3.09	1
chr17	19239788	19239998	22905	1e-17	+	19239788	19239998	0	1	210,	0	-17	-15.9	6.04	1
chr17	26961070	26963995	9703	1.3e-41	-	26961070	26963995	0	3	34,1093,13,	0,464,2912	-40.9	-38.5	2.67	1
chr3	186302239	186303232	51726	4.2e-09	+	186302239	186303232	0	2	139,100,	0,893	-8.38	-7.19	1.52	1
chr6	157803004	157803213	79683	1.3e-05	+	157803004	157803213	0	1	209,	0	-4.87	-4.09	7.32	1
chr1	41976260	41976561	59269	5.5e-07	-	41976260	41976561	0	1	301,	0	-6.26	-5.3	13.9	1
chr2	67631555	67632421	54465	5e-50	+	67631555	67632421	0	1	866,	0	-49.3	-48	7.34	1
chrX	101856814	101857382	64860	5e-84	+	101856814	101857382	0	1	568,	0	-83.3	-81.7	8.39	1
chr5	114548024	114548264	5229	4.9e-09	-	114548024	114548264	0	1	240,	0	-8.31	-7.45	4.48	1
chr12	12271862	12272132	4040	2e-37	-	12271862	12272132	0	1	270,	0	-36.7	-35.4	8.32	1
chr8	23118886	23119333	91782	3e-08	+	23118886	23119333	0	1	447,	0	-7.52	-6.38	3.32	1
chr21	28216952	28217579	9510	1e-57	-	28216952	28217579	0	1	627,	0	-57	-55.6	6.68	1
chr17	57784951	57808803	81671	3.9e-07	+	57784951	57808803	0	2	158,22,	0,23830	-6.41	-5.39	4.12	1
chr1	86173367	86174116	54680	1e-34	-	86173367	86174116	0	1	749,	0	-34	-32.1	4.57	1
chr5	130762521	130767002	51735	1e-172	-	130762521	130767002	0	3	463,315,451,	0,2073,4030	-172	-170	19.1	1
chr16	67961634	67962174	5681	7.9e-44	+	67961634	67962174	0	1	540,	0	-43.1	-41.8	9.84	1
chr19	11224322	11230813	3949	0.0012	+	11224322	11230813	0	4	116,119,140,46,	0,2447,3212,6445	-2.93	-2.33	11.4	1
chr19	19754365	19754455	51291	0.00013	-	19754365	19754455	0	1	90,	0	-3.88	-3.01	3.25	1
chr10	51225489	51225699	728404	0.00039	-	51225489	51225699	0	1	210,	0	-3.41	-2.68	11.5	1
chr20	50768530	50769670	55734	6.3e-16	-	50768530	50769670	0	1	1140,	0	-15.2	-13.2	4.1	1
chr10	70098185	70099300	3189	1.3e-46	+	70098185	70099300	0	3	259,87,104,	0,711,1011	-45.9	-43.4	1.81	1
chr5	96077007	96077645	831	0.00018	+	96077007	96077645	0	3	55,87,68,	0,190,570	-3.75	-3.06	14.1	1
chr3	49568286	49569066	1605	1.3e-60	+	49568286	49569066	0	1	780,	0	-59.9	-57.7	23.5	1
chr2	149528641	149528791	26122	5e-07	+	149528641	149528791	0	1	150,	0	-6.3	-5.45	4.76	1
chr19	46286533	46286923	1762	4.3e-05	-	46286533	46286923	0	1	390,	0	-4.37	-3.62	16.1	1
chr19	56089781	56090672	163033	1e-161	-	56089781	56090672	0	1	891,	0	-161	-160	118	1
chr4	169847448	169847599	23022	1.8e-05	+	169847448	169847599	0	1	151,	0	-4.75	-3.44	1.4	1
chr18	12329032	12340274	10939	2.5e-81	-	12329032	12340274	0	3	750,195,75,	0,8307,11167	-80.6	-79	23.3	1
chr5	137727451	137727930	51780	1e-48	+	137727451	137727930	0	1	479,	0	-48	-46.4	11.1	1
chr20	57570241	57571755	1522	0	-	57570241	57571755	0	2	573,114,	0,1400	-365	#NAME?	13.1	1
chr14	76425039	76425398	7043	2.6e-09	-	76425039	76425398	0	1	359,	0	-8.59	-7.68	13.5	1
chr2	11347917	11354552	9475	2.5e-18	-	11347917	11354552	0	4	119,161,160,70,	0,495,3889,6565	-17.6	-16.6	3.84	1
chr15	91424537	91425344	5045	1.3e-68	+	91424537	91425344	0	1	807,	0	-67.9	-65	3.25	1
chr11	93431511	93431961	85459	7.9e-29	+	93431511	93431961	0	1	450,	0	-28.1	-26.9	6.55	1
chr22	46316964	46317741	7477	1e-284	-	46316964	46317741	0	1	777,	0	-284	-281	30.9	1
chr1	215794162	215794223	51133	0.0015	+	215794162	215794223	0	1	61,	0	-2.82	-2.12	1.66	1
chr1	161094726	161094817	4817	0.001	+	161094726	161094817	0	1	91,	0	-3	-1.99	6.72	1
chr12	93968452	93969142	8835	6.3e-60	+	93968452	93969142	0	1	690,	0	-59.2	-57.8	9.78	1
chr16	84520513	84522911	57707	1.8e-07	-	84520513	84522911	0	2	152,28,	0,2370	-6.75	-5.71	5.32	1
chr19	38697781	38698081	23094	8.1e-07	+	38697781	38698081	0	1	300,	0	-6.09	-5.08	8.2	1
chr19	9868188	9870540	162993	6.3e-18	-	9868188	9870540	0	2	1252,5,	0,2347	-17.2	-16.2	20.4	1
chr16	84094405	84097047	8720	1.9e-05	-	84094405	84097047	0	2	13,138,	0,2504	-4.72	-3.93	2.09	1
chr6	128410961	128411112	5796	0.00076	-	128410961	128411112	0	1	151,	0	-3.12	-2.04	1.67	1
chr2	164465429	164468205	55137	1e-141	-	164465429	164468205	0	1	2776,	0	-141	-139	239	1
chr19	7534874	7535151	23370	3.4e-05	+	7534874	7535151	0	2	41,140,	0,137	-4.47	-3.36	1.52	1
chr1	35452752	35453801	9204	5e-20	-	35452752	35453801	0	1	1049,	0	-19.3	-18.2	38.1	1
chr7	66057250	66057371	493754	4.2e-05	-	66057250	66057371	0	1	121,	0	-4.38	-3.47	3.29	1
chr19	36673396	36674596	147929	6.3e-23	-	36673396	36674596	0	1	1200,	0	-22.2	-21.1	26.9	1
chr5	10657149	10657509	651746	1.3e-17	+	10657149	10657509	0	1	360,	0	-16.9	-15.8	9.09	1
chr1	75198822	75198972	1429	0.00015	-	75198822	75198972	0	1	150,	0	-3.81	-3.01	2.51	1
chr1	19577962	19578053	23065	0.00015	-	19577962	19578053	0	1	91,	0	-3.82	-2.95	9.76	1
chr17	40854265	40854445	2145	3.2e-12	-	40854265	40854445	0	1	180,	0	-11.5	-10.6	2.77	1
chr9	16437189	16437519	54796	6.3e-12	-	16437189	16437519	0	1	330,	0	-11.2	-9.91	3.61	1
chr3	9876580	9877181	100526693	7.9e-16	+	9876580	9877181	0	1	601,	0	-15.1	-13.3	3.19	1
chr16	31477950	31478398	79798	6.3e-06	+	31477950	31478398	0	1	448,	0	-5.2	-4.38	14.7	1
chrX	54209025	54209415	54954	4.3e-05	-	54209025	54209415	0	1	390,	0	-4.37	-3.23	4.96	1
chr10	126630965	126662790	54764	1e-245	+	126630965	126662790	0	5	911,188,154,72,22,	0,24197,29568,31248,31803	-245	-243	48.5	1
chr14	45432492	45433660	23116	5e-94	+	45432492	45433660	0	1	1168,	0	-93.3	-91.6	20.2	1
chr6	31508213	31509858	100532737	1.3e-19	-	31508213	31509858	0	2	228,132,	0,1513	-18.9	-17.6	4.75	1
chr17	19186283	19186910	22905	6.3e-54	+	19186283	19186910	0	1	627,	0	-53.2	-51.4	11.2	1
chr7	23053559	23053740	84668	4e-10	-	23053559	23053740	0	1	181,	0	-9.4	-8.51	7.06	1
chr2	48025863	48032100	2956	0	+	48025863	48032100	0	3	2608,266,52,	0,4695,6185	-599	#NAME?	69.4	1
chr5	36241662	36242258	133686	4.7e-09	-	36241662	36242258	0	2	238,61,	0,535	-8.33	-7.14	3.87	1
chr19	10224684	10226064	692312	1e-105	+	10224684	10226064	0	1	1380,	0	-105	-103	17	1
chr11	842823	842999	7106	1.4e-05	+	842823	842999	0	2	92,59,	0,117	-4.86	-3.92	6.18	1
chr5	149934959	149935828	3340	2.5e-32	+	149934959	149935828	0	1	869,	0	-31.6	-30.4	7.73	1
chr16	2695800	2695891	645644	7.1e-05	+	2695800	2695891	0	1	91,	0	-4.15	-3.21	4.84	1
chr14	31598340	31598641	25831	4.3e-05	-	31598340	31598641	0	1	301,	0	-4.37	-3.62	16.1	1
chr7	44079558	44079797	255031	2.5e-08	+	44079558	44079797	0	1	239,	0	-7.61	-6.62	25.1	1
chrX	151996050	151996410	1069	1e-41	-	151996050	151996410	0	1	360,	0	-41	-39.7	3.18	1
chr19	1249929	1250109	90007	0.00056	+	1249929	1250109	0	1	180,	0	-3.25	-2.15	1.89	1
chr21	28216564	28216715	9510	0.0019	-	28216564	28216715	0	1	151,	0	-2.73	-2.15	10.7	1
chr6	125283861	125304575	154214	1e-229	+	125283861	125304575	0	2	711,62,	0,20652	-229	-227	57	1
chr11	63448921	63449192	10313	2.5e-85	+	63448921	63449192	0	1	271,	0	-84.6	-82.5	53.7	1
chr15	78305168	78305647	23102	6.3e-85	-	78305168	78305647	0	1	479,	0	-84.2	-82.6	9.53	1
chr14	68162390	68162510	51109	8.3e-06	-	68162390	68162510	0	1	120,	0	-5.08	-4.27	5.35	1
chr16	81009698	81015412	56942	2e-70	-	81009698	81015412	0	2	378,2,	0,5712	-69.7	-68.2	4.81	1
chr19	57956204	57956952	388567	1e-26	+	57956204	57956952	0	1	748,	0	-26	-24.9	16	1
chr16	30794386	30794717	23361	1e-105	-	30794386	30794717	0	1	331,	0	-105	-103	17.4	1
chr5	1633969	1634120	728613	8.9e-08	-	1633969	1634120	0	1	151,	0	-7.05	-6	10.7	1
chr1	184662710	184675816	80267	1e-104	-	184662710	184675816	0	4	896,48,186,40,	0,7920,9234,13066	-104	-102	32.5	1
chr16	11444988	11445527	116028	6.3e-67	+	11444988	11445527	0	1	539,	0	-66.2	-64.7	7.84	1
chr15	85327637	85328087	9640	5e-17	+	85327637	85328087	0	1	450,	0	-16.3	-14.8	3.19	1
chr6	49426815	49427026	4594	4.7e-10	-	49426815	49427026	0	1	211,	0	-9.33	-8.39	2.3	1
chr2	28002349	28002493	9553	3e-05	+	28002349	28002493	0	1	144,	0	-4.52	-3.28	1.3	1
chr8	104412239	104413747	81034	1e-236	-	104412239	104413747	0	2	535,4,	0,1504	-236	-234	11.3	1
chr4	4304042	4304370	166793	1.6e-22	+	4304042	4304370	0	1	328,	0	-21.8	-20.7	9.36	1
chr6	136610898	136610989	9774	1.9e-09	-	136610898	136610989	0	1	91,	0	-8.72	-7.85	2.63	1
chr8	28610548	28610788	2137	6.3e-21	+	28610548	28610788	0	1	240,	0	-20.2	-19	10.5	1
chr12	112943980	112944339	5781	3.6e-09	+	112943980	112944339	0	1	359,	0	-8.44	-7.53	3.47	1
chr8	38175082	38175532	54904	1.6e-44	-	38175082	38175532	0	1	450,	0	-43.8	-42.5	7.45	1
chr4	1379682	1380191	57654	1.3e-19	+	1379682	1380191	0	1	509,	0	-18.9	-17.6	60.9	1
chr7	100075102	100076484	81628	1e-10	-	100075102	100076484	0	2	828,68,	0,1314	-10	-8.59	2.87	1
chr15	73925543	73925753	27020	2.5e-22	-	73925543	73925753	0	1	210,	0	-21.6	-20.2	8.84	1
chr5	149932805	149933075	3340	1.7e-10	+	149932805	149933075	0	1	270,	0	-9.78	-8.17	7.11	1
chr5	176720891	176722031	64324	0	+	176720891	176722031	0	1	1140,	0	-516	#NAME?	34.2	1
chr10	3819740	3819861	1316	0.00021	-	3819740	3819861	0	1	121,	0	-3.68	-2.94	2.22	1
chr21	43716279	43716727	9619	3.2e-33	+	43716279	43716727	0	1	448,	0	-32.5	-31.1	30.3	1
chr5	66460392	66460663	375449	6.8e-06	+	66460392	66460663	0	1	271,	0	-5.17	-3.82	2.33	1
chr19	58375112	58375322	84914	4e-08	+	58375112	58375322	0	1	210,	0	-7.4	-5.94	6.36	1
chr2	37074186	37074397	6801	4.2e-08	-	37074186	37074397	0	1	211,	0	-7.38	-6.55	2.28	1
chr14	72138154	72139080	26037	1.7e-07	+	72138154	72139080	0	2	255,16,	0,910	-6.78	-5.5	2.66	1
chr16	24580508	24580599	5930	0.00081	+	24580508	24580599	0	1	91,	0	-3.09	-2.09	4.31	1
chr21	45138977	45148825	8566	2.5e-20	+	45138977	45148825	0	2	285,45,	0,9803	-19.6	-17.5	3.97	1
chr6	26392554	26394082	10385	3.2e-53	+	26392554	26394082	0	1	1528,	0	-52.5	-51.1	8.22	1
chr5	176885316	176885645	1627	1.3e-32	-	176885316	176885645	0	1	329,	0	-31.9	-30.5	2.93	1
chr2	238949957	238950407	140739	1.3e-16	+	238949957	238950407	0	1	450,	0	-15.9	-14.9	2.99	1
chr15	90991896	90992809	8826	0.00029	+	90991896	90992809	0	2	72,19,	0,894	-3.54	-2.88	13.4	1
chr10	81585657	81585897	642361	1.8e-05	+	81585657	81585897	0	1	240,	0	-4.75	-3.61	4.93	1
chr1	117491890	117509850	5738	2e-99	+	117491890	117509850	0	3	304,426,318,	0,11974,17642	-98.7	-96	3.89	1
chr17	73316328	73316478	2885	1.5e-09	-	73316328	73316478	0	1	150,	0	-8.82	-7.61	1.8	1
chr21	36164620	36169753	861	2e-14	-	36164620	36169753	0	2	287,44,	0,5089	-13.7	-12.1	1.89	1
chr1	92642405	92642913	23285	7.9e-26	+	92642405	92642913	0	1	508,	0	-25.1	-24	12.5	1
chr8	145745093	145746053	9684	1e-133	+	145745093	145746053	0	2	345,432,	0,528	-133	-131	18.5	1
chr16	88636848	88653013	124245	1e-15	+	88636848	88653013	0	3	126,617,6,	0,6669,16159	-15	-13	2.75	1
chr14	51223263	51223353	51199	0.00068	-	51223263	51223353	0	1	90,	0	-3.17	-2.18	1.78	1
chr13	115070276	115070545	65110	5e-12	+	115070276	115070545	0	1	269,	0	-11.3	-10.2	2.52	1
chr4	79831789	79833341	55589	5e-56	+	79831789	79833341	0	1	1552,	0	-55.3	-53.9	25.5	1
chr10	104391298	104391927	51684	3.5e-07	+	104391298	104391927	0	1	629,	0	-6.45	-5.49	7.27	1
chr20	30533085	30534318	81572	4e-17	-	30533085	30534318	0	2	607,20,	0,1213	-16.4	-15.4	8.13	1
chr7	73097542	73097781	84277	2e-12	-	73097542	73097781	0	1	239,	0	-11.7	-10.6	7.75	1
chr3	38294442	38295487	9943	0	+	38294442	38295487	0	1	1045,	0	-400	#NAME?	19.4	1
chr6	152702329	152702420	23345	0.00056	-	152702329	152702420	0	1	91,	0	-3.25	-2.53	8.33	1
chr10	14949161	14949969	64421	2.1e-08	-	14949161	14949969	0	1	808,	0	-7.68	-6.83	3.52	1
chr7	75957066	75957876	7532	2.5e-62	-	75957066	75957876	0	1	810,	0	-61.6	-60.2	11.9	1
chr13	52602465	52603185	9724	1e-123	+	52602465	52603185	0	1	720,	0	-123	-122	13.5	1
chr3	184062418	184062838	131408	4.9e-08	+	184062418	184062838	0	1	420,	0	-7.31	-6	2.82	1
chr7	1131171	1131622	2852	3.2e-08	+	1131171	1131622	0	1	451,	0	-7.5	-6.62	6.1	1
chr16	68961569	68961840	79613	2.5e-14	+	68961569	68961840	0	1	271,	0	-13.6	-12.7	3.42	1
chr14	63842132	63848829	5529	6.3e-64	-	63842132	63848829	0	2	694,56,	0,6641	-63.2	-61.7	142	1
chr10	103588205	103588558	100289509	5.9e-05	+	103588205	103588558	0	1	353,	0	-4.23	-3.48	13.6	1
chr5	178460280	178460820	345462	6.3e-11	+	178460280	178460820	0	1	540,	0	-10.2	-9.3	6.54	1
chr21	33686884	33687094	56246	6.3e-21	+	33686884	33687094	0	1	210,	0	-20.2	-19.1	4.83	1
chr3	50005207	50005925	10180	4.6e-08	+	50005207	50005925	0	1	718,	0	-7.34	-5.87	3.38	1
chr16	19514512	19519059	51573	5e-99	-	19514512	19519059	0	3	427,212,51,	0,1690,4496	-98.3	-96.6	24.5	1
chr6	8080039	8080188	9521	1e-11	-	8080039	8080188	0	1	149,	0	-11	-10.1	1.75	1
chrX	152612420	152612601	10838	1.3e-05	+	152612420	152612601	0	1	181,	0	-4.89	-3.56	2.57	1
chr2	62728161	62728431	200728	1.9e-07	-	62728161	62728431	0	1	270,	0	-6.73	-5.91	11.8	1
chr4	110972518	110980806	79071	1.6e-20	-	110972518	110980806	0	2	400,48,	0,8240	-19.8	-18.2	3.96	1
chr17	18218201	18218321	7156	0.00012	-	18218201	18218321	0	1	120,	0	-3.92	-3.04	4.15	1
chr20	32868459	32868580	191	1.8e-05	-	32868459	32868580	0	1	121,	0	-4.75	-3.58	1.22	1
chr5	72875710	72876544	84135	1e-293	+	72875710	72876544	0	1	834,	0	-293	-291	14.5	1
chr17	18443778	18443958	284047	0.00019	-	18443778	18443958	0	1	180,	0	-3.71	-2.6	4.27	1
chr1	230415059	230415749	2590	1e-276	+	230415059	230415749	0	1	690,	0	-276	-273	9.2	1
chr22	37962131	37962546	11135	2e-17	+	37962131	37962546	0	1	415,	0	-16.7	-14.8	1.92	1
chr16	19090428	19090579	10229	3.1e-09	+	19090428	19090579	0	1	151,	0	-8.51	-7.51	2.41	1
chr1	110091185	110091246	2773	2.5e-08	+	110091185	110091246	0	1	61,	0	-7.6	-6.53	3.9	1
chr4	2967031	2967870	2868	2.5e-37	+	2967031	2967870	0	1	839,	0	-36.6	-35.4	15.7	1
chr3	196754704	196756597	4241	7.4e-05	-	196754704	196756597	0	2	77,73,	0,1820	-4.13	-3.05	1.99	1
chr4	2252155	2252958	10608	4e-14	-	2252155	2252958	0	2	273,148,	0,655	-13.4	-12.2	44.2	1
chr5	180035049	180036031	2324	3.2e-38	-	180035049	180036031	0	2	235,64,	0,918	-37.5	-36.2	6.24	1
chr22	24032927	24033048	91316	0.0018	-	24032927	24033048	0	1	121,	0	-2.75	-1.79	11.3	1
chr14	23777059	23778035	599	1.1e-06	+	23777059	23778035	0	2	349,11,	0,965	-5.97	-4.91	3.5	1
chr1	227935626	227946807	116841	0	+	227935626	227946807	0	2	308,112,	0,11069	-2940	#NAME?	101	1
chr4	26432342	26432793	3516	2.5e-18	+	26432342	26432793	0	1	451,	0	-17.6	-15.5	2.61	1
chr1	33402289	33404005	127544	1e-174	-	33402289	33404005	0	2	621,8,	0,1708	-174	-172	17	1
chr22	39909534	39910581	54471	5e-35	+	39909534	39910581	0	1	1047,	0	-34.3	-32	3.66	1
chr10	5772535	5777295	54906	5e-22	+	5772535	5777295	0	2	631,29,	0,4731	-21.3	-19.7	4.55	1
chr6	166353022	166361793	90632	1e-229	-	166353022	166361793	0	2	1232,83,	0,8688	-229	-227	40.4	1
chr14	24572831	24573339	5106	4e-55	+	24572831	24573339	0	1	508,	0	-54.4	-52.6	9.11	1
chr6	145947929	145948675	7957	1.6e-40	-	145947929	145948675	0	1	746,	0	-39.8	-38.4	39.6	1
chr6	34973582	34985324	23294	0.0012	+	34973582	34985324	0	2	16,75,	0,11667	-2.92	-1.96	2.27	1
chr16	4745170	4745261	84309	0.00022	+	4745170	4745261	0	1	91,	0	-3.65	-2.79	2.46	1
chr2	207945100	208030787	8609	4e-56	-	207945100	208030787	0	5	888,124,631,71,597,	0,8081,43397,53690,85090	-55.4	-53.9	32.5	1
chr16	78133535	78133955	51741	1e-232	+	78133535	78133955	0	1	420,	0	-232	-230	31.5	1
chr1	158064433	158065124	55243	1e-142	+	158064433	158065124	0	1	691,	0	-142	-140	11.5	1
chr20	60869565	60869805	9885	2.3e-07	+	60869565	60869805	0	1	240,	0	-6.64	-5.61	5.21	1
chr16	25043209	25043772	554206	2.2e-08	+	25043209	25043772	0	1	563,	0	-7.65	-6.8	15.2	1
chr17	17696367	17697055	10743	1e-221	+	17696367	17697055	0	1	688,	0	-221	-218	16.5	1
chr10	71993100	71993190	5464	2e-05	-	71993100	71993190	0	1	90,	0	-4.69	-3.77	2.78	1
chr9	21861990	21862560	4507	1e-112	+	21861990	21862560	0	1	570,	0	-112	-111	5.73	1
chr19	18417488	18417907	25804	2e-31	-	18417488	18417907	0	1	419,	0	-30.7	-29.4	6.25	1
chr2	201677141	201677975	9689	0.00076	+	201677141	201677975	0	2	75,45,	0,789	-3.12	-2.22	11.9	1
chr2	47389696	47403710	805	1e-138	-	47389696	47403710	0	3	105,31,131,	0,8176,13883	-138	-135	2.13	1
chr1	206634399	206634998	23380	2.1e-10	+	206634399	206634998	0	1	599,	0	-9.67	-8.42	3.79	1
chr8	126448288	126449601	10221	1.3e-26	+	126448288	126449601	0	1	1313,	0	-25.9	-23.9	6.71	1
chr15	77472113	77472744	79834	2e-29	-	77472113	77472744	0	1	631,	0	-28.7	-27.6	74.5	1
chr19	50432537	50432718	23636	3.3e-07	-	50432537	50432718	0	1	181,	0	-6.48	-5.01	1.87	1
chr2	234774801	234776996	151507	3.2e-17	-	234774801	234776996	0	2	1195,24,	0,2171	-16.5	-15.5	25.4	1
chr1	53675693	53676765	1376	1e-56	+	53675693	53676765	0	1	1072,	0	-56	-54.5	7.5	1
chr17	77083904	77084355	64772	1e-207	+	77083904	77084355	0	1	451,	0	-207	-205	38.6	1
chr3	38180118	38180298	4615	5.8e-07	+	38180118	38180298	0	1	180,	0	-6.24	-5.22	9.76	1
chr19	45593419	45594101	79760	2e-62	+	45593419	45594101	0	1	682,	0	-61.7	-60	20.5	1
chr7	128808064	128808245	340348	4.9e-09	+	128808064	128808245	0	1	181,	0	-8.31	-7.45	2.41	1
chr16	88880171	88880351	2588	5e-14	-	88880171	88880351	0	1	180,	0	-13.3	-12.2	15	1
chr18	48512997	48513535	55520	5e-40	+	48512997	48513535	0	1	538,	0	-39.3	-38.1	10.7	1
chr14	102606218	102606429	91833	5.4e-08	+	102606218	102606429	0	1	211,	0	-7.27	-6.4	9.22	1
chr16	30667377	30667675	78994	2e-16	+	30667377	30667675	0	1	298,	0	-15.7	-14.5	5.34	1
chr7	50512520	50516852	63979	1e-162	-	50512520	50516852	0	4	2475,17,109,37,	0,3145,3358,4295	-162	-160	64.9	1
chr5	89814589	89820979	116068	1e-203	-	89814589	89820979	0	2	712,128,	0,6262	-203	-201	14.3	1
chr3	47537248	47537634	54859	1.3e-13	-	47537248	47537634	0	1	386,	0	-12.9	-11.3	2.3	1
chr11	61897695	61897995	3619	5.5e-05	+	61897695	61897995	0	1	300,	0	-4.26	-3	1.53	1
chr4	89617777	89618964	266812	2.5e-29	-	89617777	89618964	0	1	1187,	0	-28.6	-27.4	45.2	1
chr16	85008125	85012873	55625	1e-143	-	85008125	85012873	0	4	2000,131,82,79,	0,2575,3404,4669	-143	-141	25.6	1
chr12	118810659	118810750	51347	3.8e-09	-	118810659	118810750	0	1	91,	0	-8.42	-7.39	11.8	1
chr20	42939709	42939889	128486	9.8e-07	-	42939709	42939889	0	1	180,	0	-6.01	-5.01	5.58	1
chr1	154930341	154931931	90780	1.6e-51	-	154930341	154931931	0	1	1590,	0	-50.8	-49.4	12.3	1
chr7	935026	935296	51608	5.4e-07	+	935026	935296	0	1	270,	0	-6.27	-5.37	22.1	1
chr3	48964862	48982604	10425	4e-44	+	48964862	48982604	0	2	384,36,	0,17706	-43.4	-41	3.09	1
chr6	35801318	35801977	6732	1.3e-80	-	35801318	35801977	0	1	659,	0	-79.9	-78.3	12.6	1
chr20	17970623	17971253	92667	2.5e-50	+	17970623	17971253	0	1	630,	0	-49.6	-48.2	15.7	1
chr1	206627575	206627875	23380	8.9e-05	+	206627575	206627875	0	1	300,	0	-4.05	-3.17	4.01	1
chr3	12977047	12978008	9922	4e-21	-	12977047	12978008	0	1	961,	0	-20.4	-19.3	9.04	1
chr9	130551503	130552308	1025	4e-67	+	130551503	130552308	0	1	805,	0	-66.4	-63.9	3.84	1
chr17	8077966	8078355	84314	1.1e-07	-	8077966	8078355	0	1	389,	0	-6.97	-6.1	9.22	1
chr15	75660877	75660968	4123	3.7e-05	-	75660877	75660968	0	1	91,	0	-4.43	-3.66	5.71	1
chr15	40092177	40092328	11245	6.8e-06	-	40092177	40092328	0	1	151,	0	-5.17	-4.36	21.4	1
chr21	47664818	47665028	8888	1.1e-08	-	47664818	47665028	0	1	210,	0	-7.97	-7.08	3.12	1
chr13	28195028	28195089	51082	0.00051	+	28195028	28195089	0	1	61,	0	-3.29	-2.43	3.87	1
chr17	42089237	42089446	84336	2e-07	-	42089237	42089446	0	1	209,	0	-6.7	-5.67	4.12	1
chr2	86075088	86078565	8869	9.3e-07	-	86075088	86078565	0	2	239,179,	0,3298	-6.03	-5.23	13.1	1
chr3	57613509	57619072	201627	1e-162	-	57613509	57619072	0	6	563,75,103,110,54,81,	0,1028,2638,2932,3142,5482	-162	-160	47.6	1
chr6	160525728	160526297	3482	4e-16	+	160525728	160526297	0	1	569,	0	-15.4	-14.5	9.05	1
chr18	43795795	43820041	147339	1e-127	+	43795795	43820041	0	2	766,71,	0,24175	-127	-125	11.8	1
chr1	155220334	155220544	10712	3.9e-07	-	155220334	155220544	0	1	210,	0	-6.41	-5.51	12.7	1
chr16	57698048	57698825	9289	3.2e-52	+	57698048	57698825	0	1	777,	0	-51.5	-48.8	2.57	1
chr8	48102219	48102460	100287846	4e-28	+	48102219	48102460	0	1	241,	0	-27.4	-25.2	9.05	1
chr7	105254442	105254923	222255	6.3e-26	-	105254442	105254923	0	1	481,	0	-25.2	-24.1	21.4	1
chr3	112729894	112730164	25871	4e-25	-	112729894	112730164	0	1	270,	0	-24.4	-23.3	3.33	1
chr3	52874026	52874536	375346	1.3e-16	-	52874026	52874536	0	1	510,	0	-15.9	-14.5	3.98	1
chr14	32623871	32624262	394	2e-72	+	32623871	32624262	0	1	391,	0	-71.7	-70.1	4.72	1
chr11	63525714	63526014	10313	1e-140	+	63525714	63526014	0	1	300,	0	-140	-138	3.55	1
chr4	6862815	6863986	9778	1e-85	+	6862815	6863986	0	1	1171,	0	-85	-83.4	10.1	1
chr4	152498669	152498969	729830	6.3e-24	+	152498669	152498969	0	1	300,	0	-23.2	-22.1	11.6	1
chr20	11904615	11904705	22903	0.00017	+	11904615	11904705	0	1	90,	0	-3.77	-2.96	1.85	1
chr19	10800820	10803095	3609	0	+	10800820	10803095	0	1	2275,	0	-772	#NAME?	23.4	1
chr2	68357887	68358513	116143	1.6e-27	-	68357887	68358513	0	1	626,	0	-26.8	-25.6	10	1
chr19	12297404	12299347	7695	4e-39	+	12297404	12299347	0	1	1943,	0	-38.4	-37.1	71.4	1
chr9	37518262	37521662	26267	1.3e-20	-	37518262	37521662	0	2	173,97,	0,3303	-19.9	-18.9	7.42	1
chrX	48979989	48980079	27238	3.9e-08	-	48979989	48980079	0	1	90,	0	-7.41	-6.34	5.37	1
chr22	18273383	18274164	57553	3.6e-07	-	18273383	18274164	0	3	299,74,197,	0,380,584	-6.44	-5.53	10.4	1
chr11	129784614	129784855	56980	2.5e-13	-	129784614	129784855	0	1	241,	0	-12.6	-11.5	6.41	1
chr12	110367875	110368625	9815	1e-19	-	110367875	110368625	0	1	750,	0	-19	-18	8.53	1
chr13	77574596	77574895	1203	1e-156	+	77574596	77574895	0	1	299,	0	-156	-154	13.3	1
chr11	33795845	33796071	26273	0.00083	-	33795845	33796071	0	2	48,132,	0,94	-3.08	-2.24	2.3	1
chr11	62554122	62554813	10629	4e-52	+	62554122	62554813	0	1	691,	0	-51.4	-49.6	15	1
chr16	572210	572481	9727	1e-16	+	572210	572481	0	1	271,	0	-16	-14.7	7.95	1
chr11	111612111	111612231	5519	4.2e-05	-	111612111	111612231	0	1	120,	0	-4.38	-3.63	1.71	1
chr6	35442601	35442782	7005	7.1e-05	-	35442601	35442782	0	1	181,	0	-4.15	-3.26	2.84	1
chr3	11599938	11600209	9686	4.1e-10	-	11599938	11600209	0	1	271,	0	-9.39	-8.15	2.04	1
chr21	34967657	34968040	9946	1.5e-09	-	34967657	34968040	0	2	177,4,	0,379	-8.83	-7.96	2.83	1
chr1	10093279	10093609	10277	1.3e-06	+	10093279	10093609	0	1	330,	0	-5.87	-5.04	2.5	1
chr19	50547998	50548268	25888	1.2e-06	+	50547998	50548268	0	1	270,	0	-5.91	-5.11	2.51	1
chr10	22608892	22608952	23412	0.00089	+	22608892	22608952	0	1	60,	0	-3.05	-2.24	2.86	1
chr5	141248237	141248478	5097	6.8e-06	-	141248237	141248478	0	1	241,	0	-5.17	-4.39	16.5	1
chr5	77781067	77781397	10184	5e-15	-	77781067	77781397	0	1	330,	0	-14.3	-13.4	9.33	1
chr9	139007714	139008673	90120	5e-39	-	139007714	139008673	0	1	959,	0	-38.3	-36.2	5.1	1
chr17	40353708	40353829	6777	6.3e-12	-	40353708	40353829	0	1	121,	0	-11.2	-10	3.45	1
chr14	74185093	74185754	91748	3.2e-17	-	74185093	74185754	0	1	661,	0	-16.5	-14.7	6.9	1
chr1	228400431	228401155	574407	2e-14	-	228400431	228401155	0	2	177,33,	0,691	-13.7	-12.6	39.9	1
chr15	65982754	65988745	10260	1e-145	-	65982754	65988745	0	2	1095,42,	0,5949	-145	-143	15.9	1
chr21	46643123	46643214	104	0.00091	+	46643123	46643214	0	1	91,	0	-3.04	-2.34	10.5	1
chr5	114859813	114880471	56929	1e-123	-	114859813	114880471	0	3	1501,734,252,	0,18833,20406	-123	-121	79.7	1
chr16	72137660	72137907	9785	0.0032	+	72137660	72137907	0	2	27,63,	0,184	-2.5	-1.72	1.36	1
chr1	178063013	178063163	9462	1e-05	+	178063013	178063163	0	1	150,	0	-4.98	-4.05	17.2	1
chr16	89806583	89807302	92822	2e-16	+	89806583	89807302	0	1	719,	0	-15.7	-14.7	8.58	1
chr6	83845377	83847061	23033	1.6e-09	+	83845377	83847061	0	2	220,170,	0,1514	-8.79	-7.87	30.9	1
chr7	56022682	56023033	51373	1e-116	+	56022682	56023033	0	1	351,	0	-116	-114	4.91	1
chr12	98995178	98995509	5250	1e-76	+	98995178	98995509	0	1	331,	0	-76	-74.4	50	1
chr3	69219805	69230748	23150	1.3e-51	-	69219805	69230748	0	3	1327,133,699,	0,5869,10244	-50.9	-49.6	22.1	1
chr19	11942731	11944792	126070	1.6e-51	+	11942731	11944792	0	1	2061,	0	-50.8	-49.4	13.5	1
chr7	5821180	5821361	54476	4.3e-05	-	5821180	5821361	0	1	181,	0	-4.37	-3.47	21.5	1
chr16	69752396	69760444	1728	2.2e-06	-	69752396	69760444	0	2	41,109,	0,7939	-5.66	-4.46	1.4	1
chr14	104200715	104201165	23368	1.3e-11	-	104200715	104201165	0	1	450,	0	-10.9	-9.69	7.53	1
chr1	107599326	107600993	55170	1e-157	+	107599326	107600993	0	1	1667,	0	-157	-155	23.7	1
chr19	36239438	36239556	55957	0.0018	+	36239438	36239556	0	1	118,	0	-2.74	-1.96	4.29	1
chr16	57494558	57494738	57017	4e-11	+	57494558	57494738	0	1	180,	0	-10.4	-9.34	2.99	1
chr11	75236299	75236569	81544	5e-17	-	75236299	75236569	0	1	270,	0	-16.3	-15.2	26.1	1
chr11	77728072	77728163	65987	3e-06	-	77728072	77728163	0	1	91,	0	-5.52	-4.54	3.28	1
chr4	6717900	6719120	55330	0	+	6717900	6719120	0	1	1220,	0	-392	#NAME?	25.3	1
chr7	29690357	29724958	646762	6.3e-29	-	29690357	29724958	0	2	598,570,	0,34031	-28.2	-26.9	10.9	1
chr4	25930785	25931412	389203	4e-26	+	25930785	25931412	0	1	627,	0	-25.4	-23.7	3.48	1
chr10	99435106	99435677	55361	1.9e-06	+	99435106	99435677	0	1	571,	0	-5.72	-4.73	4.49	1
chr16	2721228	2722368	100507321	1e-91	-	2721228	2722368	0	1	1140,	0	-91	-89.4	13.4	1
chr19	59092930	59093559	65996	3.5e-10	+	59092930	59093559	0	1	629,	0	-9.45	-8.32	8.37	1
chr1	109289284	109295690	6814	5.1e-05	+	109289284	109295690	0	3	124,50,6,	0,5594,6400	-4.29	-3.2	3.03	1
chr5	180256983	180258113	100859930	4e-54	-	180256983	180258113	0	1	1130,	0	-53.4	-51.9	16.7	1
chr3	106965117	106965357	344595	6.5e-05	+	106965117	106965357	0	1	240,	0	-4.19	-3.25	3	1
chr14	105417048	105417139	113146	0.0047	-	105417048	105417139	0	1	91,	0	-2.33	-1.81	9.37	1
chr2	88327822	88328001	51315	5.9e-06	-	88327822	88328001	0	1	179,	0	-5.23	-4.21	10.8	1
chrX	49142435	49142973	89801	1.3e-27	+	49142435	49142973	0	1	538,	0	-26.9	-25.6	9.71	1
chr4	140393860	140394311	83452	2e-47	+	140393860	140394311	0	1	451,	0	-46.7	-45.4	30.2	1
chr19	18888003	18888213	23373	2e-07	+	18888003	18888213	0	1	210,	0	-6.69	-5.56	28.5	1
chr6	14135398	14136436	9308	1e-48	+	14135398	14136436	0	1	1038,	0	-48	-46.6	41.3	1
chr11	72145395	72145575	81570	3.7e-06	-	72145395	72145575	0	1	180,	0	-5.43	-4.24	2.56	1
chr9	130876242	130876868	100289019	0	-	130876242	130876868	0	1	626,	0	-612	#NAME?	121	1
chr10	115664631	115668144	374354	6.3e-34	+	115664631	115668144	0	2	164,106,	0,3407	-33.2	-32	2.6	1
chr14	23303565	23303626	122704	0.00018	+	23303565	23303626	0	1	61,	0	-3.75	-2.89	4.68	1
chr10	89624090	89685299	5728	7.9e-06	+	89624090	89685299	0	3	215,85,30,	0,29691,61179	-5.1	-3.93	2.51	1
chr14	21561434	21561790	51222	0.00013	-	21561434	21561790	0	2	15,46,	0,310	-3.87	-2.95	2.23	1
chr7	74456402	74457211	81554	1.5e-07	-	74456402	74457211	0	1	809,	0	-6.82	-5.9	20.7	1
chr15	59949617	59949737	2958	3.5e-07	-	59949617	59949737	0	1	120,	0	-6.46	-5.61	3.7	1
chr11	46695802	46696012	9776	3.2e-07	+	46695802	46696012	0	1	210,	0	-6.49	-5.67	2.89	1
chr13	111164713	111164804	1284	0.00051	+	111164713	111164804	0	1	91,	0	-3.29	-2.26	1.24	1
chr18	60985519	60985729	596	6.2e-06	-	60985519	60985729	0	1	210,	0	-5.21	-3.85	12.4	1
chr1	180062654	180063284	9857	1.6e-99	+	180062654	180063284	0	1	630,	0	-98.8	-97.2	9.04	1
chr12	58121735	58122118	116986	5e-05	-	58121735	58122118	0	2	133,18,	0,365	-4.3	-3.33	19.4	1
chr8	48872532	48872743	5591	5e-14	-	48872532	48872743	0	1	211,	0	-13.3	-12.2	35.5	1
chr3	126178358	126178749	79364	3.4e-07	-	126178358	126178749	0	1	391,	0	-6.47	-5.62	26.2	1
chr2	10924025	10927541	10130	5e-54	-	10924025	10927541	0	3	427,97,135,	0,1034,3381	-53.3	-51.9	9.06	1
chr1	148004300	148004781	25832	5e-12	-	148004300	148004781	0	1	481,	0	-11.3	-9.81	4.53	1
chr22	20103562	20104071	27037	6.6e-06	-	20103562	20104071	0	1	509,	0	-5.18	-4.16	2.56	1
chr6	56350127	56354306	667	2e-19	-	56350127	56354306	0	3	142,170,19,	0,1774,4160	-18.7	-17.2	23.2	1
chr1	223178351	223179337	84976	1.3e-18	+	223178351	223179337	0	1	986,	0	-17.9	-16.8	23.8	1
chr1	113459696	113472626	6566	0	-	113459696	113472626	0	4	970,144,261,124,	0,4915,12017,12806	-378	#NAME?	68.5	1
chr13	88327812	88328230	26050	6.9e-07	+	88327812	88328230	0	1	418,	0	-6.16	-5.05	21.3	1
chr13	34392205	34395281	5983	5e-14	+	34392205	34395281	0	2	197,13,	0,3063	-13.3	-12	52.7	1
chr3	57898111	57898292	7871	1.1e-05	+	57898111	57898292	0	1	181,	0	-4.95	-3.61	1.77	1
chr3	9988985	9989254	285368	1.1e-06	-	9988985	9989254	0	1	269,	0	-5.94	-4.99	4.88	1
chr22	29949481	29949676	8563	8.7e-06	-	29949481	29949676	0	2	163,17,	0,178	-5.06	-4.11	4.68	1
chr17	21203925	21204290	5606	0.0004	+	21203925	21204290	0	2	45,105,	0,260	-3.4	-2.74	4.85	1
chr1	235826099	235826310	1130	9.8e-08	-	235826099	235826310	0	1	211,	0	-7.01	-6.18	3.6	1
chr8	119122421	119122719	2131	6.3e-85	-	119122421	119122719	0	1	298,	0	-84.2	-82.7	15.3	1
chr6	30680574	30681084	9656	5e-09	-	30680574	30681084	0	1	510,	0	-8.3	-6.77	2.16	1
chr14	63173974	63174963	27133	5e-93	-	63173974	63174963	0	1	989,	0	-92.3	-90.7	50	1
chr20	45874810	45875229	23613	1e-12	-	45874810	45875229	0	1	419,	0	-12	-10.7	3.2	1
chr15	42044508	42050029	23269	5.5e-07	+	42044508	42050029	0	3	6,131,44,	0,2126,5477	-6.26	-5.41	2.72	1
chrX	19983238	19984210	256643	2e-26	-	19983238	19984210	0	2	586,13,	0,959	-25.7	-24.6	11	1
chr15	69489468	69489739	26035	2.5e-20	+	69489468	69489739	0	1	271,	0	-19.6	-18.5	4.84	1
chr22	24937334	24937575	83606	1.6e-05	-	24937334	24937575	0	1	241,	0	-4.79	-3.56	5.93	1
chr19	58968899	58969080	388569	0.00038	+	58968899	58969080	0	1	181,	0	-3.42	-2.54	14	1
chr1	204438010	204459018	5287	2.5e-40	-	204438010	204459018	0	2	1004,75,	0,20933	-39.6	-38.1	7.67	1
chr1	28562601	28563018	93974	7.9e-21	+	28562601	28563018	0	2	180,147,	0,270	-20.1	-18.1	1.8	1
chr2	202032435	202032556	8837	0.00019	+	202032435	202032556	0	1	121,	0	-3.72	-2.68	14.8	1
chr16	30596482	30596732	146540	0.002	-	30596482	30596732	0	2	115,5,	0,245	-2.69	-2	9.15	1
chr3	40553948	40557502	253639	3.2e-45	+	40553948	40557502	0	2	58,152,	0,3402	-44.5	-43.2	15.3	1
chr2	160139223	160142878	151525	5e-29	-	160139223	160142878	0	2	381,8,	0,3647	-28.3	-27.2	10.4	1
chr7	42004704	42005692	2737	1.6e-86	-	42004704	42005692	0	1	988,	0	-85.8	-83.9	15.8	1
chr16	88742150	88742750	197187	2.5e-12	+	88742150	88742750	0	1	600,	0	-11.6	-10.6	20.7	1
chr11	61563135	61564684	2237	2e-91	+	61563135	61564684	0	1	1549,	0	-90.7	-87.6	2.49	1
chr6	32948502	32948863	6046	1e-204	+	32948502	32948863	0	1	361,	0	-204	-201	5.16	1
chr2	200136195	200137212	23314	1e-141	-	200136195	200137212	0	1	1017,	0	-141	-140	18.2	1
chr17	81042751	81050939	284207	5e-19	+	81042751	81050939	0	2	448,28,	0,8160	-18.3	-16.4	18.5	1
chr9	140508256	140508525	92714	1.6e-26	+	140508256	140508525	0	1	269,	0	-25.8	-24.5	12.5	1
chr16	89293669	89295369	197320	2e-55	+	89293669	89295369	0	1	1700,	0	-54.7	-53.4	16.7	1
chr11	68028802	68031263	53838	1e-107	-	68028802	68031263	0	2	1584,104,	0,2357	-107	-106	23.6	1
chr6	138743300	138743749	57224	2.5e-37	-	138743300	138743749	0	1	449,	0	-36.6	-35.3	13.6	1
chr1	168169175	168169414	261726	2.5e-34	+	168169175	168169414	0	1	239,	0	-33.6	-32.4	2.4	1
chr3	184039080	184040236	1981	6.3e-87	+	184039080	184040236	0	2	811,87,	0,1069	-86.2	-83.2	2.6	1
chr7	129474300	129474480	7328	6.9e-06	-	129474300	129474480	0	1	180,	0	-5.16	-4.38	2.07	1
chr5	176882785	176883287	80758	4e-28	+	176882785	176883287	0	1	502,	0	-27.4	-26	16	1
chr2	239355077	239355437	51665	3.2e-12	+	239355077	239355437	0	1	360,	0	-11.5	-10.1	2.66	1
chr11	72003499	72005447	81570	1e-239	-	72003499	72005447	0	3	1160,105,79,	0,1566,1869	-239	-236	20.5	1
chr13	52972035	52976683	55901	1.8e-08	-	52972035	52976683	0	2	294,6,	0,4642	-7.74	-6.83	8.17	1
chr20	10603338	10603997	128710	3.2e-07	+	10603338	10603997	0	1	659,	0	-6.49	-5.64	6.84	1
chr19	7680142	7680418	57662	0.0011	+	7680142	7680418	0	2	66,115,	0,161	-2.95	-1.99	7.71	1
chr18	9102627	9117848	4729	2e-20	+	9102627	9117848	0	2	168,13,	0,15208	-19.7	-18.3	21.5	1
chr4	140309725	140310263	80155	2.5e-34	+	140309725	140310263	0	1	538,	0	-33.6	-32.4	6.08	1
chr7	129474658	129474898	7328	6.3e-18	-	129474658	129474898	0	1	240,	0	-17.2	-16.2	4.54	1
chr16	779828	780008	64428	8.5e-06	-	779828	780008	0	1	180,	0	-5.07	-4.15	2.42	1
chrX	117526603	117526842	54521	2.5e-15	+	117526603	117526842	0	1	239,	0	-14.6	-13.1	12	1
chr2	202149553	202151235	841	2.5e-19	+	202149553	202151235	0	2	487,54,	0,1628	-18.6	-17.5	6.62	1
chr13	97490410	97491427	266722	2.5e-65	+	97490410	97491427	0	1	1017,	0	-64.6	-63.2	18.2	1
chr15	45003684	45007643	567	1e-155	+	45003684	45007643	0	2	127,23,	0,3936	-155	-153	17.4	1
chr1	62902603	62905481	7398	1e-67	+	62902603	62905481	0	2	468,12,	0,2866	-67	-65.6	8	1
chr11	62571666	62572934	10482	4.3e-07	-	62571666	62572934	0	2	16,134,	0,1134	-6.37	-5.41	14.2	1
chr7	56131916	56136198	25870	2e-17	+	56131916	56136198	0	2	155,24,	0,4258	-16.7	-15.5	4.87	1
chr7	1785733	1786004	392617	3.2e-11	+	1785733	1786004	0	1	271,	0	-10.5	-9.02	2.9	1
chr16	314955	315254	83986	6.3e-21	+	314955	315254	0	1	299,	0	-20.2	-18.8	5.26	1
chr19	36503942	36504316	84964	0.00013	-	36503942	36504316	0	2	49,71,	0,303	-3.89	-2.97	1.98	1
chr13	77457631	77457812	115207	5.8e-05	-	77457631	77457812	0	1	181,	0	-4.24	-3.47	4.96	1
chr20	60813639	60831188	9885	0.0013	+	60813639	60831188	0	2	14,76,	0,17473	-2.89	-1.8	2.19	1
chr3	48698967	48699597	1951	1.3e-16	-	48698967	48699597	0	1	630,	0	-15.9	-14.7	44.2	1
chr15	44084436	44085249	10169	1e-123	+	44084436	44085249	0	2	373,77,	0,736	-123	-121	8.05	1
chr1	46744429	46744608	10489	4.3e-07	-	46744429	46744608	0	1	179,	0	-6.37	-5.4	2.56	1
chr12	53775477	53776013	6667	4.5e-07	+	53775477	53776013	0	2	120,120,	0,416	-6.35	-5.27	1.99	1
chr18	32870924	32871105	10778	5.8e-05	+	32870924	32871105	0	1	181,	0	-4.24	-3.47	5	1
chr9	19057883	19058963	54801	0	-	19057883	19058963	0	1	1080,	0	-345	#NAME?	10.9	1
chr19	1567516	1567967	399664	9.8e-09	-	1567516	1567967	0	1	451,	0	-8.01	-6.84	12.9	1
chr1	175128785	175129025	9674	7.9e-14	-	175128785	175129025	0	1	240,	0	-13.1	-12.1	5.67	1
chr2	46607410	46607531	2034	0.011	+	46607410	46607531	0	1	121,	0	-1.95	-1.48	8.03	1
chr22	19711398	19712297	100526833	2e-28	+	19711398	19712297	0	1	899,	0	-27.7	-25.9	5	1
chr6	31126833	31129347	6941	7.9e-33	+	31126833	31129347	0	2	651,124,	0,2390	-32.1	-30.2	3.28	1
chr2	64685557	64685857	29094	2.8e-07	+	64685557	64685857	0	1	300,	0	-6.55	-5.46	3.09	1
chr6	56918500	56919516	57691	3.2e-32	+	56918500	56919516	0	1	1016,	0	-31.5	-30.4	5.94	1
chr2	144764704	144765003	79712	5e-11	-	144764704	144765003	0	1	299,	0	-10.3	-9.44	7.19	1
chr9	84303356	84303596	7088	1.6e-07	-	84303356	84303596	0	1	240,	0	-6.8	-5.7	6.99	1
chr4	184931162	184931462	56977	3.2e-11	+	184931162	184931462	0	1	300,	0	-10.5	-9.61	12.4	1
chr2	27579265	27579632	2976	0.00038	-	27579265	27579632	0	2	94,27,	0,340	-3.42	-2.52	7.38	1
chr2	113299790	113300090	84172	2.5e-16	+	113299790	113300090	0	1	300,	0	-15.6	-14.5	4.48	1
chr3	48465525	48465885	5364	1.3e-20	-	48465525	48465885	0	1	360,	0	-19.9	-18.7	9.6	1
chr4	83812245	83812365	22872	0.00079	-	83812245	83812365	0	1	120,	0	-3.1	-2.28	2.6	1
chr1	27326387	27326628	388610	1.4e-08	+	27326387	27326628	0	1	241,	0	-7.86	-6.95	4.39	1
chr14	59970675	59970915	51528	1.6e-24	+	59970675	59970915	0	1	240,	0	-23.8	-22.7	3.17	1
chr16	84156548	84157056	83693	7.9e-21	-	84156548	84157056	0	1	508,	0	-20.1	-19	21.7	1
chr9	125084820	125085385	92399	1.6e-45	+	125084820	125085385	0	1	565,	0	-44.8	-43.5	5.18	1
chr17	3763946	3765297	84254	1e-83	-	3763946	3765297	0	1	1351,	0	-83	-81.3	19.3	1
chr6	97338950	97339220	29078	2e-42	-	97338950	97339220	0	1	270,	0	-41.7	-40.4	3.05	1
chr7	5632435	5642609	6624	1e-30	+	5632435	5642609	0	2	964,107,	0,10067	-30	-28.5	49.5	1
chr15	59428974	59429184	4643	3.9e-05	-	59428974	59429184	0	1	210,	0	-4.41	-3.65	9.37	1
chr3	47452780	47452960	25930	9.5e-07	+	47452780	47452960	0	1	180,	0	-6.02	-5.01	2.62	1
chr16	68597721	68599402	146198	2e-60	+	68597721	68599402	0	1	1681,	0	-59.7	-58.3	12.2	1
chr2	97500730	97500881	26505	6.2e-05	+	97500730	97500881	0	1	151,	0	-4.21	-3.4	4.01	1
chr1	90398950	90401542	55144	1e-207	+	90398950	90401542	0	1	2592,	0	-207	-205	103	1
chr4	8477522	8478299	152992	2e-29	+	8477522	8478299	0	1	777,	0	-28.7	-27.6	15.9	1
chr17	2415109	2415200	79066	0.00074	-	2415109	2415200	0	1	91,	0	-3.13	-2.31	4.29	1
chr1	183209659	183210350	3918	5.6e-09	+	183209659	183210350	0	1	691,	0	-8.25	-6.87	3.72	1
chr19	49132126	49132813	56848	3.2e-58	+	49132126	49132813	0	1	687,	0	-57.5	-55.8	26.2	1
chr8	116631627	116631868	7227	2.5e-23	-	116631627	116631868	0	1	241,	0	-22.6	-21.4	7.66	1
chr2	37429563	37429772	100505876	5.2e-05	+	37429563	37429772	0	1	209,	0	-4.28	-3.1	5.86	1
chr1	161128261	161128616	51506	3.2e-92	+	161128261	161128616	0	1	355,	0	-91.5	-89.9	3.32	1
chr18	32823138	32823318	84307	0.00015	+	32823138	32823318	0	1	180,	0	-3.81	-3.06	7.14	1
chr15	59279864	59280481	54778	1.3e-65	+	59279864	59280481	0	2	403,137,	0,480	-64.9	-63.4	51.2	1
chr4	146560505	146560685	166785	2e-05	+	146560505	146560685	0	1	180,	0	-4.7	-3.72	19.4	1
chr19	58419529	58420874	147687	3.2e-13	-	58419529	58420874	0	1	1345,	0	-12.5	-11.6	7.45	1
chr12	52452754	52452904	3164	2.5e-14	+	52452754	52452904	0	1	150,	0	-13.6	-12.5	2.04	1
chr7	7841372	7917000	729852	0.0014	+	7841372	7917000	0	2	2,89,	0,75539	-2.85	-2.15	1.91	1
chr10	121436313	121437180	9531	3.2e-61	+	121436313	121437180	0	1	867,	0	-60.5	-59.1	11	1
chr22	39917793	39918033	468	2.3e-05	+	39917793	39918033	0	1	240,	0	-4.63	-3.5	1.14	1
chr4	128627651	128629731	27152	2e-78	+	128627651	128629731	0	2	473,6,	0,2074	-77.7	-76.2	11	1
chr3	196612162	196612551	205564	5e-80	+	196612162	196612551	0	1	389,	0	-79.3	-77.9	8.71	1
chr22	42969876	42970086	91695	2.1e-06	-	42969876	42970086	0	1	210,	0	-5.67	-4.87	3.1	1
chr12	50794591	50821545	113251	1.6e-24	+	50794591	50821545	0	3	220,49,1,	0,11596,26953	-23.8	-22.4	41	1
chr9	138392476	138392596	51116	1e-12	+	138392476	138392596	0	1	120,	0	-12	-10.8	16.3	1
chr12	122957848	122962429	55596	1.6e-14	-	122957848	122962429	0	2	974,42,	0,4539	-13.8	-12.2	4.05	1
chr2	99953863	99976750	9669	1e-17	+	99953863	99976750	0	2	189,52,	0,22835	-17	-14.9	2.13	1
chr11	3877202	3988794	6786	6.3e-44	+	3877202	3988794	0	2	437,13,	0,111579	-43.2	-41.7	5.93	1
chr6	86352772	86353043	10492	5e-13	-	86352772	86353043	0	1	271,	0	-12.3	-11.3	2.84	1
chr10	112771478	112771569	8036	0.00022	+	112771478	112771569	0	1	91,	0	-3.66	-2.93	2.04	1
chr1	33291811	33292500	64766	0	+	33291811	33292500	0	1	689,	0	-445	#NAME?	15.7	1
chr7	66460438	66460588	51119	2.9e-08	-	66460438	66460588	0	1	150,	0	-7.54	-6.54	7.12	1
chr1	183212313	183213123	3918	6.3e-38	+	183212313	183213123	0	1	810,	0	-37.2	-34.5	2.11	1
chr13	52548303	52549204	540	1e-30	-	52548303	52549204	0	1	901,	0	-30	-28.8	5.78	1
chr1	168148170	168148350	261726	2.5e-06	+	168148170	168148350	0	1	180,	0	-5.6	-4.67	2.88	1
chr10	76788699	76789418	23522	4.7e-07	+	76788699	76789418	0	1	719,	0	-6.33	-5.07	3.54	1
chr10	114710038	114710576	6934	1.4e-06	+	114710038	114710576	0	1	538,	0	-5.84	-4.84	17.6	1
chr15	73043827	73045142	83440	4e-24	-	73043827	73045142	0	1	1315,	0	-23.4	-21.4	4.09	1
chr1	211486767	211487126	55758	1.5e-09	+	211486767	211487126	0	1	359,	0	-8.82	-7.41	3.97	1
chr12	32490482	32490811	636	9.5e-09	+	32490482	32490811	0	1	329,	0	-8.02	-6.6	7.53	1
chr3	101483692	101484293	79598	1e-134	+	101483692	101484293	0	1	601,	0	-134	-132	18.9	1
chr14	57742151	57749708	55745	6.2e-05	+	57742151	57749708	0	4	24,228,140,57,	0,4761,6655,7500	-4.21	-3.44	17.8	1
chr6	136597060	136597599	9774	0	-	136597060	136597599	0	1	539,	0	-370	#NAME?	8.36	1
chr14	74180088	74181069	9240	7.9e-92	-	74180088	74181069	0	1	981,	0	-91.1	-88.9	205	1
chr6	56323683	56324967	667	1.3e-19	-	56323683	56324967	0	2	382,39,	0,1245	-18.9	-16.7	2.43	1
chr19	2852405	2854085	148254	1e-112	+	2852405	2854085	0	1	1680,	0	-112	-110	18	1
[truncated: 8,001 more rows]

## Sheet: M1_related_functions
Category	Term	Count	%	PValue	Genes	List Total	Pop Hits	Pop Total	Fold Enrichment	Bonferroni	Benjamini	FDR
BBID	104.Insulin_signaling	9	0.222717	0.0972789	5164, 5781, 5894, 2885, 5170, 5295, 207, 6654, 2475	70	10	124	1.59429	0.999795	0.999795	66.5775
BIOCARTA	h_ptenPathway:PTEN dependent cell cycle arrest and apoptosis	10	0.247463	0.0280066	5728, 3688, 5164, 2885, 2309, 6464, 5170, 5295, 207, 6654	365	10	644	1.76438	0.999533	0.999533	31.1672
BIOCARTA	h_il2rbPathway:IL-2 Receptor Beta Chain in T cell Activation	14	0.346449	0.0350694	596, 5894, 6464, 3716, 207, 6198, 1399, 8837, 2885, 6777, 9021, 5295, 4609, 6654	365	16	644	1.54384	0.999935	0.991928	37.4608
BIOCARTA	h_nfatPathway:NFAT and Hypertrophy of the heart (Transcription in the broken heart)	16	0.395942	0.0354271	811, 805, 1452, 1432, 5894, 4775, 5604, 801, 2932, 207, 1906, 6198, 2247, 5576, 1387, 5295	365	19	644	1.4858	0.999941	0.961082	37.765
BIOCARTA	h_pcafPathway:The information-processing pathway at the IFN-beta enhancer	8	0.197971	0.0732563	3725, 3661, 3660, 1387, 3146, 5970, 5430, 4790	365	8	644	1.76438	1	0.994115	63.2226
BIOCARTA	h_eif4Pathway:Regulation of eIF4e and p70 S6 Kinase	12	0.296956	0.076292	1982, 5728, 6198, 1981, 5164, 1432, 1978, 5170, 8672, 5295, 207, 2475	365	14	644	1.51233	1	0.986232	64.7754
BIOCARTA	h_insulinPathway:Insulin Signaling Pathway	10	0.247463	0.077227	3725, 6722, 5781, 5894, 2885, 6464, 5604, 3643, 5295, 6654	365	11	644	1.60399	1	0.97313	65.2414
BIOCARTA	h_igf1Pathway:IGF-1 Signaling Pathway	10	0.247463	0.077227	3725, 3480, 6722, 5781, 5894, 2885, 6464, 5604, 5295, 6654	365	11	644	1.60399	1	0.97313	65.2414
COG_ONTOLOGY	Transcription / Cell division and chromosome partitioning	20	0.494927	0.0679987	7673, 90338, 55762, 84450, 4520, 285268, 84124, 92822, 9923, 27107, 2736, 10520, 2737, 92999, 57862, 284370, 64375, 7716, 7862, 23060	544	23	819	1.30914	0.957952	0.957952	48.4317
GOTERM_BP_DIRECT	GO:0006351~transcription, DNA-templated	580	14.3529	2.35301e-06	57343, 2005, 57209, 146050, 23512, 3280, 1316, 5371, 25799, 221937, 197407, 388536, 1822, 10614, 6497, 22807, 604, 146540, 84289, 58499, 146542, 204851, 26009, 8028, 25788, 126626, 8726, 8725, 79618, 1810, 8019, 58492, 90632, 641339, 374655, 11083, 23636, 5253, 55213, 58487, 1432, 8861, 138151, 8031, 27086, 84193, 388561, 55922, 2976, 7332, 148254, 388558, 85441, 23522, 8427, 55205, 101060200, 79…	3418	849	5587	1.11668	0.0146497	0.0146497	0.00458464
GOTERM_BP_DIRECT	GO:0006355~regulation of transcription, DNA-templated	448	11.0864	5.12788e-06	57343, 23512, 57209, 3280, 5371, 25799, 197407, 388536, 2958, 146540, 1827, 146542, 204851, 26009, 6882, 25788, 23509, 10626, 7341, 58492, 641339, 55213, 8861, 388561, 23635, 10732, 7332, 148254, 388558, 2972, 811, 8427, 23522, 55205, 101060200, 5245, 323, 51385, 100101467, 80854, 339327, 388567, 388569, 2961, 2960, 8848, 6595, 55900, 571, 127396, 146198, 6597, 10957, 4968, 2104, 162972, 27034, 5…	3418	647	5587	1.13183	0.0316504	0.0159525	0.00999099
GOTERM_BP_DIRECT	GO:0045893~positive regulation of transcription, DNA-templated	159	3.93467	0.00936583	3725, 4041, 4040, 6018, 2149, 1316, 100529261, 9862, 79902, 221937, 2296, 8321, 8322, 4613, 1387, 23300, 56916, 4920, 55023, 7161, 6615, 84289, 9355, 55755, 1385, 9440, 3344, 4297, 7481, 9915, 10474, 10626, 79618, 51763, 4790, 64324, 7555, 4609, 23636, 10524, 8554, 4779, 4775, 8031, 5970, 55729, 84193, 1785, 9575, 8301, 2068, 7041, 23291, 1998, 28996, 1649, 51804, 4090, 7043, 84722, 23522, 391, 5…	3418	230	5587	1.12999	1	1	16.7523
GOTERM_BP_DIRECT	GO:0048812~neuron projection morphogenesis	17	0.420688	0.0105322	153090, 100532736, 7477, 5058, 1785, 28988, 5364, 57679, 84062, 6993, 10479, 23405, 538, 6446, 84079, 7368, 23380	3418	18	5587	1.54377	1	1	18.6414
GOTERM_BP_DIRECT	GO:0007010~cytoskeleton organization	50	1.23732	0.0174973	55785, 57553, 7750, 91010, 23031, 5064, 128486, 8030, 4739, 157922, 27252, 27445, 667, 113251, 10298, 10383, 9202, 10381, 1729, 114793, 9203, 2245, 9204, 55023, 23094, 55660, 54764, 51517, 23139, 58480, 6494, 375449, 22885, 832, 752, 23022, 152503, 6712, 375790, 6710, 6711, 23499, 5493, 6840, 8139, 54014, 3911, 9645, 7368, 5819	3418	66	5587	1.23832	1	1	29.1032
GOTERM_BP_DIRECT	GO:0042632~cholesterol homeostasis	18	0.445434	0.0203288	6646, 9619, 4041, 9969, 4864, 100133941, 29116, 857, 271, 57048, 3949, 26119, 20, 116150, 7840, 55004, 27346, 23411	3418	20	5587	1.47112	1	1	32.9801
GOTERM_BP_DIRECT	GO:0043627~response to estrogen	18	0.445434	0.0203288	6715, 2033, 5929, 100133941, 9070, 857, 2737, 8085, 3329, 10370, 3939, 410, 7048, 3566, 1495, 1827, 4091, 7043	3418	20	5587	1.47112	1	1	32.9801
GOTERM_BP_DIRECT	GO:0007219~Notch signaling pathway	34	0.841376	0.0230279	4853, 3280, 2033, 4851, 84934, 57534, 54492, 6400, 23462, 22938, 2296, 23013, 6868, 3516, 113878, 1387, 7048, 102, 26032, 9794, 3714, 84441, 55759, 1903, 650, 9270, 6233, 23509, 351, 55534, 79094, 23385, 79633, 4609	3418	43	5587	1.29246	1	1	36.4876
GOTERM_BP_DIRECT	GO:0009411~response to UV	20	0.494927	0.0244514	840, 6738, 57654, 2071, 5371, 2073, 57805, 22954, 5366, 54962, 51455, 10277, 5562, 4221, 1153, 2956, 1161, 7398, 83932, 51514	3418	23	5587	1.42138	1	1	38.2668
GOTERM_BP_DIRECT	GO:0016477~cell migration	62	1.53427	0.0263567	9289, 57175, 3280, 9344, 7297, 4898, 10298, 2296, 2195, 10297, 25794, 387, 55604, 54764, 6615, 5796, 23022, 2013, 5792, 6548, 1901, 5170, 3716, 5364, 1942, 10092, 6198, 3688, 7410, 399687, 3915, 54820, 1490, 3911, 221178, 91010, 81610, 64759, 2932, 23358, 9672, 8440, 5420, 55660, 1445, 5728, 64083, 79834, 1464, 1969, 6624, 100133941, 324, 9270, 8754, 8476, 5335, 23080, 6383, 6385, 10188, 57147	3418	85	5587	1.19228	1	1	40.574
GOTERM_BP_DIRECT	GO:0045944~positive regulation of transcription from RNA polymerase II promoter	248	6.13709	0.034294	3725, 57343, 4520, 4205, 3280, 5371, 4613, 8878, 607, 7161, 6613, 6497, 2958, 22807, 171023, 2852, 1488, 58499, 8028, 207, 126626, 54790, 7337, 6777, 10725, 4221, 10620, 23125, 4790, 4609, 4779, 10229, 1432, 7227, 4775, 8861, 51193, 84193, 27086, 23633, 23635, 253461, 4784, 8440, 4782, 4781, 85441, 4233, 7182, 7043, 23522, 55870, 2309, 10318, 10499, 10743, 9181, 55534, 23109, 79447, 153090, 6595,…	3418	376	5587	1.07813	1	1	49.3348
GOTERM_BP_DIRECT	GO:0048015~phosphatidylinositol-mediated signaling	28	0.692898	0.0349577	22876, 10818, 55763, 5781, 9846, 2475, 3480, 387, 2247, 57690, 253260, 5287, 5286, 2064, 5728, 5155, 5170, 207, 2261, 7430, 6198, 8473, 2885, 5298, 55615, 5295, 5296, 5297	3418	35	5587	1.30767	1	1	50.009
GOTERM_BP_DIRECT	GO:0043491~protein kinase B signaling	11	0.27221	0.0356315	5728, 6198, 6199, 558, 1969, 83667, 117145, 22933, 5287, 23064, 207	3418	11	5587	1.63458	1	1	50.6847
GOTERM_BP_DIRECT	GO:0045746~negative regulation of Notch signaling pathway	11	0.27221	0.0356315	56892, 81544, 9139, 2624, 79094, 1745, 84934, 23462, 65989, 55343, 604	3418	11	5587	1.63458	1	1	50.6847
GOTERM_BP_DIRECT	GO:0035335~peptidyl-tyrosine dephosphorylation	32	0.791883	0.0376365	5784, 5783, 11072, 5781, 11221, 11099, 9829, 8073, 54434, 5802, 1843, 283871, 8776, 64419, 1849, 5797, 1847, 5775, 8897, 5728, 5796, 25930, 138639, 2140, 5792, 150290, 994, 80824, 9110, 92609, 5786, 285193	3418	41	5587	1.27577	1	1	52.6445
GOTERM_BP_DIRECT	GO:0007416~synapse assembly	16	0.395942	0.0403495	7855, 5728, 9369, 6712, 8927, 9746, 28988, 27445, 8321, 56133, 56123, 56122, 627, 8443, 23129, 85358	3418	18	5587	1.45296	1	1	55.1791
GOTERM_BP_DIRECT	GO:0045892~negative regulation of transcription, DNA-templated	145	3.58822	0.0423223	3725, 3720, 3280, 23462, 5371, 51222, 6421, 221937, 8321, 10614, 6418, 81628, 604, 54815, 57761, 1488, 55031, 9252, 22882, 4193, 7481, 112939, 5036, 11007, 1616, 7071, 25836, 8726, 79618, 51763, 7341, 6015, 4221, 1611, 10524, 51592, 58487, 51497, 8553, 8861, 138151, 5970, 55729, 51193, 9575, 27086, 57805, 55922, 23291, 23013, 1998, 9774, 3516, 253461, 1649, 51804, 7727, 49854, 64412, 811, 23522, …	3418	215	5587	1.10239	1	1	56.9407
GOTERM_BP_DIRECT	GO:0022604~regulation of cell morphogenesis	13	0.321703	0.0475332	7750, 9202, 832, 128486, 152503, 1946, 114793, 9203, 9204, 157922, 55023, 54764, 113251	3418	14	5587	1.51783	1	1	61.2833
GOTERM_BP_DIRECT	GO:0030335~positive regulation of cell migration	49	1.21257	0.0479355	1601, 10500, 57343, 2149, 7869, 4851, 56034, 10507, 22919, 10509, 4641, 22954, 3480, 1729, 6868, 7422, 4638, 54859, 54910, 3678, 4920, 8877, 2150, 5420, 55604, 102, 6615, 84904, 2852, 3037, 6810, 5155, 2651, 23224, 652, 324, 1901, 5058, 650, 7481, 1906, 3918, 6405, 9480, 80031, 3643, 1613, 4067, 5295	3418	67	5587	1.19544	1	1	61.6007
GOTERM_BP_DIRECT	GO:0015012~heparan sulfate proteoglycan biosynthetic process	10	0.247463	0.0536724	29940, 126792, 2131, 3340, 8509, 64131, 64132, 26035, 2137, 26229	3418	10	5587	1.63458	1	1	65.8667
GOTERM_BP_DIRECT	GO:0006367~transcription initiation from RNA polymerase II promoter	44	1.08884	0.0590041	7003, 9969, 7005, 7025, 4853, 23054, 5438, 4851, 2071, 9862, 404672, 22938, 1025, 5465, 2068, 3516, 1387, 367, 2104, 2958, 9794, 9477, 9975, 7182, 10413, 9441, 51586, 84441, 2063, 6882, 6257, 6884, 6256, 9440, 126382, 3164, 55534, 2961, 2960, 6878, 1490, 5430, 5433, 2968	3418	60	5587	1.19869	1	1	69.4249
GOTERM_BP_DIRECT	GO:0007165~signal transduction	238	5.88963	0.0606741	10206, 1192, 8744, 4615, 3480, 3482, 41, 3925, 8877, 65059, 6494, 1827, 6093, 10333, 1185, 3097, 55852, 8874, 3096, 55227, 90525, 5364, 207, 29, 26000, 10725, 4790, 8439, 1453, 1452, 1432, 214, 8763, 55922, 5612, 7187, 2977, 54472, 8440, 4090, 4233, 9994, 5245, 51684, 8045, 285704, 10602, 5335, 10497, 6385, 23380, 115, 3628, 57584, 11228, 2475, 2247, 2245, 4659, 8500, 6398, 4650, 5600, 4651, 5152…	3418	364	5587	1.06876	1	1	70.4651
GOTERM_BP_DIRECT	GO:0007519~skeletal muscle tissue development	17	0.420688	0.0624198	93185, 7026, 1432, 2033, 27086, 857, 79828, 6840, 23309, 93986, 8837, 4637, 51804, 6901, 6498, 11149, 1827	3418	20	5587	1.38939	1	1	71.5164
GOTERM_BP_DIRECT	GO:0007507~heart development	53	1.31156	0.0652283	6722, 840, 5781, 4205, 5894, 6659, 6464, 4851, 5681, 2296, 10614, 4152, 2064, 6091, 5604, 3397, 1906, 23509, 9821, 1909, 1982, 10370, 8195, 161882, 2257, 5318, 5591, 9645, 11149, 2057, 729991, 5310, 23054, 1889, 7227, 2624, 2033, 130916, 5465, 23118, 6901, 7048, 5728, 5155, 93, 11214, 57545, 650, 2736, 2737, 53615, 1399, 4522	3418	74	5587	1.17071	1	1	73.1336
GOTERM_BP_DIRECT	GO:0060976~coronary vasculature development	12	0.296956	0.0679764	639, 163, 3340, 1954, 51684, 652, 4628, 1785, 23129, 84516, 65250, 4091	3418	13	5587	1.50884	1	1	74.6314
GOTERM_BP_DIRECT	GO:0045666~positive regulation of neuron differentiation	21	0.519673	0.0700977	100532736, 2624, 147040, 51704, 652, 650, 124936, 2736, 654, 22954, 152, 60436, 1981, 387, 8904, 81544, 7077, 9682, 604, 6935, 2119	3418	26	5587	1.32024	1	1	75.7331
GOTERM_BP_DIRECT	GO:0007156~homophilic cell adhesion via plasma membrane adhesion molecules	23	0.569166	0.072298	1003, 5310, 5097, 6091, 27020, 5098, 22883, 23654, 1952, 1951, 56121, 9746, 2195, 3688, 56123, 56105, 56133, 56122, 9752, 5101, 5797, 79633, 5819	3418	29	5587	1.29639	1	1	76.8278
GOTERM_BP_DIRECT	GO:0043087~regulation of GTPase activity	25	0.618659	0.0737441	153090, 55785, 1946, 26037, 23654, 5048, 51735, 10928, 9270, 5364, 8831, 85360, 2475, 26000, 11033, 9462, 7410, 6993, 8826, 2245, 253260, 604, 11149, 10156, 55558	3418	32	5587	1.27702	1	1	77.5215
GOTERM_BP_DIRECT	GO:0055072~iron ion homeostasis	14	0.346449	0.0774944	26234, 2034, 94081, 4756, 8301, 51312, 55240, 3163, 81855, 27102, 94097, 4241, 567, 81894	3418	16	5587	1.43026	1	1	79.23
GOTERM_BP_DIRECT	GO:0060337~type I interferon signaling pathway	14	0.346449	0.0774944	3661, 3660, 3136, 8638, 7297, 3716, 54739, 3434, 51447, 3454, 3437, 3106, 103, 4940	3418	16	5587	1.43026	1	1	79.23
GOTERM_BP_DIRECT	GO:2000811~negative regulation of anoikis	9	0.222717	0.0802352	3688, 51651, 596, 57343, 7088, 4851, 3678, 857, 4170	3418	9	5587	1.63458	1	1	80.3999
GOTERM_BP_DIRECT	GO:0001569~patterning of blood vessels	9	0.222717	0.0802352	1909, 6722, 1282, 7422, 8829, 7048, 23129, 1906, 1499	3418	9	5587	1.63458	1	1	80.3999
GOTERM_BP_DIRECT	GO:0006921~cellular component disassembly involved in execution phase of apoptosis	9	0.222717	0.0802352	6093, 841, 840, 6304, 10059, 324, 666, 22985, 10134	3418	9	5587	1.63458	1	1	80.3999
GOTERM_BP_DIRECT	GO:0090162~establishment of epithelial cell polarity	9	0.222717	0.0802352	55612, 85302, 3280, 23094, 382, 56288, 23150, 23332, 64398	3418	9	5587	1.63458	1	1	80.3999
GOTERM_BP_DIRECT	GO:0030162~regulation of proteolysis	9	0.222717	0.0802352	55709, 25841, 7187, 22903, 114781, 8405, 26005, 55643, 55486	3418	9	5587	1.63458	1	1	80.3999
GOTERM_BP_DIRECT	GO:0007626~locomotory behavior	16	0.395942	0.0838587	6801, 5728, 1136, 5194, 56172, 51704, 55236, 2764, 2775, 57679, 351, 538, 8704, 89797, 2119, 7080	3418	19	5587	1.37649	1	1	81.851
GOTERM_BP_DIRECT	GO:0007224~smoothened signaling pathway	22	0.54442	0.0923735	22873, 146057, 204851, 138639, 6738, 3280, 200728, 2121, 57545, 652, 4735, 2736, 5727, 2737, 51057, 55835, 84976, 28996, 3340, 79989, 4920, 7048	3418	28	5587	1.28431	1	1	84.87
GOTERM_BP_DIRECT	GO:0007169~transmembrane receptor protein tyrosine kinase signaling pathway	22	0.54442	0.0923735	1445, 2064, 2444, 27020, 1464, 7525, 9846, 2324, 7297, 3716, 1796, 3480, 10006, 4919, 9788, 4920, 10188, 3643, 9019, 4233, 4067, 29990	3418	28	5587	1.28431	1	1	84.87
GOTERM_BP_DIRECT	GO:0048008~platelet-derived growth factor receptor signaling pathway	11	0.27221	0.0962768	5728, 5155, 5781, 8829, 84159, 8826, 59338, 56034, 64651, 4643, 5286	3418	12	5587	1.49837	1	1	86.0887
GOTERM_BP_DIRECT	GO:0051893~regulation of focal adhesion assembly	11	0.27221	0.0962768	6093, 23499, 1946, 7248, 6548, 8861, 1613, 23332, 9748, 9475, 51057	3418	12	5587	1.49837	1	1	86.0887
GOTERM_BP_DIRECT	GO:0006468~protein phosphorylation	125	3.09329	0.0966353	1196, 79705, 5164, 23515, 10290, 80216, 7297, 9451, 8878, 2011, 84206, 23139, 57761, 6093, 204851, 415116, 56997, 4214, 9252, 4293, 5170, 4296, 1385, 3716, 7481, 207, 9874, 1613, 1453, 22853, 1452, 2071, 10221, 2764, 5610, 2068, 28996, 4638, 5565, 5564, 5563, 5562, 4090, 7048, 102, 4093, 10114, 57551, 9770, 9891, 1445, 2444, 92335, 5155, 2081, 9238, 5058, 22868, 65125, 994, 6482, 57147, 2580, 232…	3418	188	5587	1.08682	1	1	86.1958
GOTERM_BP_DIRECT	GO:0000122~negative regulation of transcription from RNA polymerase II promoter	200	4.94927	0.0973864	4799, 23512, 3720, 4205, 2005, 3280, 6208, 1822, 10614, 84678, 8878, 6498, 7161, 6497, 604, 6615, 171023, 57761, 51564, 1488, 55758, 3096, 7071, 8726, 342371, 8725, 1810, 4221, 4790, 4609, 51592, 10229, 7227, 55729, 27086, 55869, 92140, 23013, 4784, 4782, 4781, 7727, 811, 2444, 2309, 5245, 51684, 23528, 53615, 10499, 7050, 7321, 10608, 6595, 153090, 571, 146198, 6597, 4851, 4152, 84864, 57491, 96…	3418	307	5587	1.06487	1	1	86.4177
GOTERM_CC_DIRECT	GO:0005622~intracellular	332	8.21579	0.00635917	10206, 147687, 79705, 57343, 84271, 57209, 140459, 1191, 5371, 25799, 388536, 3925, 7745, 146540, 7748, 2852, 1827, 147694, 6093, 166614, 92610, 27072, 146542, 8874, 113026, 5364, 140461, 79711, 7879, 29, 28512, 10475, 10474, 10626, 55552, 58492, 170960, 51762, 641339, 7738, 824, 51592, 1432, 51291, 9886, 9882, 388561, 8766, 7625, 163227, 7041, 148252, 55521, 1069, 388558, 7728, 4090, 348327, 584…	3621	496	5890	1.08879	0.998608	0.998608	9.62352
GOTERM_CC_DIRECT	GO:0016021~integral component of membrane	827	20.4652	0.00808789	84275, 84277, 55236, 25798, 8744, 10994, 90231, 29914, 8739, 3480, 79086, 79089, 6868, 3482, 79605, 533, 79085, 63917, 10712, 100302736, 538, 113444, 84287, 23646, 10099, 540, 50626, 10090, 8726, 84898, 738, 79613, 10725, 10726, 51290, 100507321, 8760, 79827, 55219, 8763, 55218, 165082, 8754, 10079, 91137, 6482, 51283, 79633, 1836, 55486, 55901, 63027, 84859, 57484, 60343, 113201, 121457, 51272, …	3621	1283	5890	1.04849	0.999769	0.984797	12.0855
GOTERM_CC_DIRECT	GO:0031463~Cul3-RING ubiquitin ligase complex	24	0.593912	0.0162614	79734, 57542, 90293, 571, 8405, 57563, 89890, 114818, 27252, 25948, 23276, 9903, 84541, 80311, 8139, 84861, 51088, 9920, 55295, 84078, 54813, 64410, 54800, 100526832	3621	28	5890	1.39425	1	0.996427	22.8983
GOTERM_CC_DIRECT	GO:0005794~Golgi apparatus	247	6.11235	0.0490168	10347, 5738, 51574, 50999, 1191, 22905, 55647, 10618, 100302736, 538, 2956, 607, 7161, 2852, 10333, 84287, 2013, 1182, 5744, 55755, 6882, 55754, 143187, 55361, 81848, 7879, 26003, 738, 4121, 8869, 1490, 80723, 1495, 4794, 824, 1453, 10325, 51290, 10228, 92344, 22919, 8766, 8301, 3949, 81562, 412, 811, 813, 64083, 55870, 5768, 27095, 2590, 84875, 9181, 81876, 10497, 5337, 81579, 6482, 64793, 23385…	3621	375	5890	1.0714	1	0.999998	54.9396
GOTERM_CC_DIRECT	GO:0005887~integral component of plasma membrane	193	4.77605	0.0495049	347051, 23654, 152, 3480, 3482, 6868, 8322, 8323, 41, 538, 2852, 10333, 54894, 3714, 1184, 6091, 1181, 6786, 5361, 55361, 10099, 5362, 2324, 5364, 540, 8869, 80723, 2842, 23129, 55558, 5250, 9986, 214, 8763, 3949, 9197, 340348, 7048, 4233, 65078, 1464, 5245, 10314, 610, 9187, 6385, 51283, 23385, 4241, 1836, 63027, 115, 4853, 23554, 4756, 8834, 2898, 3106, 10867, 9308, 2261, 54756, 55890, 84957, 5…	3621	290	5890	1.08255	1	0.999972	55.305
GOTERM_CC_DIRECT	GO:0016604~nuclear body	17	0.420688	0.0658197	9612, 79760, 7703, 26039, 138151, 4193, 112939, 55806, 92140, 463, 28996, 54472, 6239, 1387, 7341, 6497, 7874	3621	20	5890	1.38263	1	0.999992	66.0378
GOTERM_CC_DIRECT	GO:0030027~lamellipodium	57	1.41054	0.0698721	55785, 57630, 5783, 57175, 55742, 83442, 55740, 57679, 51466, 2195, 387, 2245, 5586, 55604, 65059, 6093, 22885, 832, 23022, 4651, 8976, 6453, 29780, 6548, 8874, 28988, 3688, 7248, 10006, 1495, 23129, 221178, 4739, 6809, 1785, 1605, 1809, 54434, 1499, 4638, 1500, 130271, 5797, 5420, 117177, 6810, 1969, 6624, 323, 324, 9270, 4810, 5335, 4771, 4628, 57147, 23380	3621	80	5890	1.15897	1	0.999977	68.3007
GOTERM_CC_DIRECT	GO:0005856~cytoskeleton	100	2.47463	0.0798157	800, 9344, 11099, 55742, 7297, 79990, 55740, 51088, 83481, 65059, 57763, 6093, 29780, 55755, 22981, 3716, 23268, 26256, 10006, 219899, 10142, 57553, 10174, 8030, 7041, 57619, 55521, 117177, 83742, 9618, 55075, 57545, 9762, 5339, 85459, 23499, 7430, 1832, 9181, 114884, 4771, 203068, 83478, 55785, 10243, 5784, 841, 5783, 26037, 8767, 57584, 1861, 27445, 10383, 23370, 51466, 387, 26128, 80149, 2245,…	3621	147	5890	1.10655	1	0.999978	73.2692
GOTERM_MF_DIRECT	GO:0046872~metal ion binding	589	14.5756	4.58201e-11	79705, 57343, 80742, 57209, 23512, 146050, 8887, 1316, 8317, 25799, 197407, 6868, 388536, 63917, 85463, 11097, 22807, 604, 146540, 6093, 58499, 146542, 23503, 7337, 540, 58492, 2021, 339487, 641339, 84890, 374655, 23536, 51291, 7227, 51193, 348654, 27086, 388561, 148254, 388558, 58486, 85441, 58480, 412, 1445, 8427, 55205, 101060200, 79831, 51385, 100101467, 23528, 8754, 339327, 388567, 10072, 11…	3454	827	5656	1.16626	9.25566e-08	9.25566e-08	7.8871e-08
GOTERM_MF_DIRECT	GO:0003700~transcription factor activity, sequence-specific DNA binding	267	6.60728	1.95024e-07	3725, 4799, 57343, 2005, 4520, 4205, 146050, 3280, 6621, 342357, 388536, 4613, 7161, 7745, 604, 22807, 147694, 1827, 55758, 3097, 23269, 8028, 6884, 54993, 126626, 7071, 10474, 6878, 6777, 10725, 4790, 4609, 4779, 58487, 7227, 4775, 51193, 27086, 126375, 388561, 7625, 25909, 10732, 1998, 253461, 388558, 7728, 4784, 4090, 4782, 7727, 4781, 4093, 7182, 4091, 55663, 55205, 2309, 125893, 100101467, 2…	3454	362	5656	1.20779	0.000393871	0.000196955	0.000335698
GOTERM_MF_DIRECT	GO:0003677~DNA binding	491	12.1505	3.83724e-07	2005, 57209, 146050, 3280, 1316, 5371, 25799, 197407, 388536, 8877, 146540, 1827, 58499, 146542, 204851, 6882, 26009, 8028, 6884, 25788, 10629, 10626, 10721, 79618, 1810, 6878, 58492, 10620, 641339, 374655, 55215, 58487, 348654, 388561, 55922, 10732, 2976, 148254, 388558, 58486, 85441, 79830, 811, 8427, 23522, 101060200, 51385, 22909, 339327, 388567, 10608, 2961, 388569, 988, 55900, 127396, 14619…	3454	705	5656	1.14046	0.000774822	0.000258341	0.000660509
GOTERM_MF_DIRECT	GO:0003676~nucleic acid binding	304	7.52289	0.00014328	147687, 57343, 23131, 84271, 146050, 57209, 1316, 140890, 23518, 25799, 317781, 197407, 57862, 388536, 56916, 7745, 604, 22807, 146540, 7748, 147694, 58499, 146542, 56919, 3096, 54993, 10626, 55552, 7073, 84991, 152815, 58492, 2021, 170960, 641339, 8867, 7738, 374655, 51193, 126375, 388561, 55922, 55218, 5612, 7625, 163227, 23013, 253461, 388558, 7728, 152485, 348327, 49854, 55663, 79830, 8427, 5…	3454	438	5656	1.13654	0.251323	0.0698057	0.246345
GOTERM_MF_DIRECT	GO:0000981~RNA polymerase II transcription factor activity, sequence-specific DNA binding	51	1.26206	0.00487772	3725, 7750, 988, 146050, 2005, 4205, 114821, 6621, 342357, 221937, 9202, 2296, 9205, 9203, 9204, 7161, 22887, 2120, 221786, 9915, 54925, 93986, 116113, 7690, 2117, 860, 55311, 8553, 2034, 121274, 27086, 9849, 2077, 5612, 1998, 9852, 7270, 4781, 22809, 7727, 58486, 55663, 79830, 7566, 5245, 9569, 6668, 6670, 285550, 468, 9988	3454	65	5656	1.28482	0.999949	0.861297	8.07219
GOTERM_MF_DIRECT	GO:0044212~transcription regulatory region DNA binding	72	1.78174	0.00784152	3725, 6595, 988, 6621, 9070, 163050, 196, 55809, 6421, 2296, 1388, 3191, 23300, 7161, 22807, 9611, 5926, 55758, 3097, 5929, 3096, 55755, 1385, 6256, 4297, 7481, 126626, 79898, 10664, 4221, 4089, 4790, 6934, 2119, 57658, 112770, 170506, 5970, 51193, 83595, 1499, 9219, 6942, 84159, 367, 1649, 64375, 59269, 7270, 7727, 22809, 7080, 4091, 10413, 80298, 2551, 55205, 163081, 5245, 51742, 84662, 91748, …	3454	97	5656	1.21548	1	0.929376	12.6729
GOTERM_MF_DIRECT	GO:0000977~RNA polymerase II regulatory region sequence-specific DNA binding	53	1.31156	0.00853244	4799, 54807, 57343, 3720, 4205, 221937, 1523, 23613, 1051, 2296, 2104, 7543, 604, 6615, 147694, 54815, 63977, 2120, 57623, 6257, 6256, 54993, 51058, 6304, 4089, 10620, 4790, 2117, 7554, 7579, 2119, 861, 3660, 11278, 2624, 7227, 1745, 5970, 126375, 57659, 10520, 64376, 84159, 22809, 7080, 84662, 27107, 6667, 2737, 6670, 100381270, 468, 4335	3454	69	5656	1.25781	1	0.91565	13.7138
GOTERM_MF_DIRECT	GO:0043565~sequence-specific DNA binding	101	2.49938	0.0360566	3725, 4205, 2005, 3280, 6621, 9753, 1523, 2296, 1388, 7161, 7745, 604, 54815, 22887, 9355, 3097, 3096, 1385, 3344, 23125, 23314, 4609, 4779, 58487, 7227, 84124, 9575, 27086, 9361, 2077, 1998, 3516, 9219, 51804, 1649, 64412, 7182, 596, 55205, 2309, 100101467, 6667, 23528, 2960, 84524, 9988, 2186, 283078, 10127, 988, 7025, 571, 7026, 4851, 84307, 1051, 5326, 2104, 9975, 51523, 7584, 2120, 2063, 803…	3454	146	5656	1.13281	1	0.999906	46.8533
GOTERM_MF_DIRECT	GO:0004725~protein tyrosine phosphatase activity	32	0.791883	0.0364983	5784, 5783, 11072, 5781, 11221, 11099, 9829, 54434, 5802, 1843, 283871, 8776, 64419, 1849, 5797, 1847, 5775, 8897, 5728, 5796, 25930, 138639, 2140, 5792, 7957, 150290, 994, 80824, 9110, 92609, 5786, 285193	3454	41	5656	1.27807	1	0.999762	47.2709
GOTERM_MF_DIRECT	GO:0008270~zinc ion binding	319	7.89409	0.0481161	7750, 4799, 10206, 54492, 23515, 100529261, 5371, 4898, 9866, 8878, 84678, 10611, 5229, 6497, 7748, 4489, 54894, 84289, 27072, 84287, 4214, 26009, 8028, 55954, 65249, 1429, 54790, 9869, 50626, 10475, 9867, 10626, 54796, 4124, 4123, 153769, 7737, 7738, 11083, 5253, 51592, 7227, 7041, 7187, 55521, 2972, 23118, 221687, 23113, 11342, 6477, 7182, 90933, 79830, 811, 8427, 23522, 1465, 55870, 10314, 548…	3454	492	5656	1.06173	1	0.999953	57.2081
GOTERM_MF_DIRECT	GO:0016301~kinase activity	73	1.80648	0.0505187	2580, 805, 5894, 801, 8767, 8317, 80216, 83440, 2475, 5586, 8526, 8877, 8527, 11252, 9146, 57761, 64781, 2064, 56997, 11142, 90956, 4293, 5170, 4296, 9815, 1796, 207, 9874, 6198, 8941, 57498, 8295, 5591, 10142, 6195, 5106, 1452, 2932, 56848, 51550, 22993, 1025, 9472, 8798, 1031, 4638, 5565, 92597, 5563, 23118, 51347, 5287, 7084, 5286, 84292, 57551, 1119, 1445, 8503, 11216, 1969, 10020, 260425, 65…	3454	104	5656	1.14941	1	0.999927	59.0296
GOTERM_MF_DIRECT	GO:0005158~insulin receptor binding	10	0.247463	0.0529295	3480, 10818, 2887, 5781, 6464, 5170, 55023, 5295, 1796, 10817	3454	10	5656	1.63752	1	0.999894	60.7839
GOTERM_MF_DIRECT	GO:0070577~lysine-acetylated histone binding	12	0.296956	0.0669481	23613, 10498, 8805, 65980, 11176, 6046, 6597, 8019, 54454, 55023, 9031, 4297	3454	13	5656	1.51156	1	0.999979	69.6623
GOTERM_MF_DIRECT	GO:0030552~cAMP binding	9	0.222717	0.0792617	5142, 57657, 5141, 610, 5576, 5144, 5139, 11149, 64208	3454	9	5656	1.63752	1	0.999993	75.8637
GOTERM_MF_DIRECT	GO:0004197~cysteine-type endopeptidase activity	22	0.54442	0.0904513	843, 9958, 842, 8078, 841, 840, 10868, 2923, 9986, 1075, 9099, 57695, 9736, 835, 1522, 8837, 9101, 9100, 25862, 1509, 7874, 7398	3454	28	5656	1.28662	1	0.999997	80.4447
GOTERM_MF_DIRECT	GO:0017147~Wnt-protein binding	11	0.27221	0.094981	11211, 7855, 8321, 4041, 4040, 8322, 8323, 79971, 4919, 4920, 129293	3454	12	5656	1.50106	1	0.999997	82.0551
INTERPRO	IPR013087:Zinc finger C2H2-type/integrase DNA-binding domain	236	5.84014	2.9153e-16	91661, 147687, 57343, 4520, 57209, 146050, 1316, 25799, 342357, 197407, 57862, 388536, 7745, 604, 6615, 22807, 146540, 147694, 7748, 58499, 146542, 3097, 3096, 54993, 7071, 55552, 58492, 170960, 641339, 7738, 374655, 9880, 51193, 126375, 388561, 163227, 7625, 148254, 253461, 388558, 7728, 152485, 348327, 7727, 49854, 55663, 8427, 55205, 55734, 101060200, 125893, 51385, 100101467, 23528, 339327, 3…	3654	282	5942	1.3609	1.22502e-12	1.22502e-12	6.10623e-13
INTERPRO	IPR015880:Zinc finger, C2H2-like	258	6.38456	9.57348e-16	91661, 147687, 57343, 4520, 57209, 146050, 64397, 1316, 25799, 342357, 197407, 57862, 388536, 7745, 604, 6615, 22807, 146540, 7748, 147694, 58499, 146542, 54897, 3097, 3096, 54993, 7071, 54796, 55552, 58492, 170960, 641339, 7738, 374655, 9880, 7227, 51193, 126375, 388561, 163227, 7625, 148254, 253461, 388558, 7728, 152485, 348327, 23394, 7727, 49854, 55663, 8427, 55734, 55205, 101060200, 125893, …	3654	314	5942	1.33615	3.67506e-12	1.83753e-12	1.84297e-12
INTERPRO	IPR007087:Zinc finger, C2H2	268	6.63202	4.35576e-15	91661, 147687, 57343, 23131, 4520, 57209, 146050, 64397, 1316, 25799, 342357, 197407, 57862, 388536, 7745, 604, 6615, 22807, 146540, 7748, 147694, 58499, 146542, 54897, 3097, 3096, 54993, 7071, 54796, 55552, 58492, 170960, 641339, 7738, 374655, 9880, 7227, 51193, 126375, 388561, 163227, 7625, 148254, 253461, 388558, 7728, 152485, 348327, 23394, 7727, 49854, 55663, 8427, 55734, 55205, 101060200, 1…	3654	330	5942	1.32064	1.59253e-11	5.30842e-12	7.9714e-12
INTERPRO	IPR001909:Krueppel-associated box	131	3.24177	1.77868e-08	10794, 90338, 91661, 54807, 147687, 57343, 57209, 163050, 90987, 342357, 25799, 163049, 388536, 54811, 7745, 146540, 51427, 147694, 7748, 91975, 146542, 55422, 284309, 79898, 54925, 10626, 55552, 58492, 170960, 7692, 7551, 7695, 641339, 7556, 90333, 7738, 7554, 220992, 51710, 100289635, 84124, 80264, 126375, 10520, 388561, 7625, 163227, 57693, 148254, 388558, 7728, 348327, 79027, 55663, 84924, 84…	3654	159	5942	1.33979	6.54178e-05	1.63549e-05	3.27549e-05
INTERPRO	IPR000210:BTB/POZ-like	67	1.65801	6.47247e-06	55709, 10206, 90293, 571, 22836, 284252, 51043, 9923, 89890, 23276, 80311, 22903, 84861, 51088, 29068, 84078, 54813, 604, 55643, 140685, 51133, 100526832, 57621, 221527, 23221, 8405, 57563, 360023, 114818, 112939, 92999, 84541, 9920, 10625, 55295, 7690, 222658, 84280, 79798, 166793, 55213, 9880, 55727, 138151, 9886, 65987, 3749, 57659, 27252, 25948, 9903, 25841, 253461, 64410, 49854, 64412, 23099…	3654	78	5942	1.39683	0.0235247	0.00474985	0.0119185
INTERPRO	IPR011333:BTB/POZ fold	69	1.7075	8.29095e-06	55709, 10206, 90293, 571, 22836, 284252, 51043, 9923, 89890, 23276, 80311, 22903, 84861, 51088, 29068, 84078, 54813, 604, 55643, 140685, 51133, 100526832, 57621, 221527, 23221, 8405, 57563, 360023, 114818, 112939, 92999, 84541, 9920, 10625, 55295, 7690, 222658, 84280, 79798, 166793, 55213, 9880, 55727, 138151, 9886, 65987, 3749, 57659, 27252, 25948, 130535, 9903, 25841, 253461, 64410, 49854, 6441…	3654	81	5942	1.38525	0.030034	0.00506948	0.0152669
INTERPRO	IPR011705:BTB/Kelch-associated	26	0.643405	0.00115617	55709, 90293, 55727, 89890, 25948, 27252, 23276, 9903, 80311, 22903, 84861, 51088, 84078, 54813, 64410, 55643, 100526832, 57542, 57563, 114818, 84541, 8139, 10625, 114781, 55295, 54800	3654	28	5942	1.51001	0.985805	0.455472	2.10781
INTERPRO	IPR011993:Pleckstrin homology-like domain	128	3.16753	0.00117724	10818, 22874, 11099, 9922, 7297, 79990, 55740, 57679, 23307, 8527, 389072, 65059, 10156, 6093, 57569, 8874, 5170, 113026, 3716, 207, 1796, 29, 79156, 7410, 149371, 55198, 25970, 10817, 221178, 8439, 114882, 1785, 9882, 57223, 11033, 9910, 1130, 54477, 23294, 116984, 23095, 84904, 116987, 116986, 323, 59338, 94134, 7430, 23187, 9181, 5335, 5337, 114884, 4771, 80301, 83478, 80790, 196513, 55671, 64…	3654	175	5942	1.18942	0.986865	0.418158	2.14584
INTERPRO	IPR001849:Pleckstrin homology domain	81	2.00445	0.00375068	153090, 23239, 55785, 6655, 22874, 57480, 50649, 9922, 57584, 79990, 23207, 9826, 84033, 23370, 23550, 2245, 8527, 389072, 65059, 10156, 26030, 6093, 6645, 57569, 4651, 6453, 8874, 113026, 1796, 8831, 207, 23164, 29, 79156, 2887, 149371, 7410, 55612, 55198, 25970, 6654, 221178, 9267, 9846, 114882, 1785, 11033, 130271, 54477, 11078, 116984, 23095, 84904, 9475, 55357, 6712, 116987, 116986, 6710, 67…	3654	108	5942	1.21962	0.999999	0.784686	6.68595
INTERPRO	IPR015919:Cadherin-like	17	0.420688	0.0112917	1003, 5097, 22883, 5098, 1952, 1951, 56121, 1605, 9746, 2195, 56105, 56133, 56123, 56122, 9752, 5101, 79633	3654	18	5942	1.53582	1	0.984651	18.8704
INTERPRO	IPR014710:RmlC-like jelly roll fold	13	0.321703	0.0163021	27133, 57657, 26504, 610, 5576, 51735, 54805, 55256, 84890, 10908, 11149, 1060, 9223	3654	13	5942	1.62616	1	0.995896	26.1165
INTERPRO	IPR001487:Bromodomain	24	0.593912	0.0163378	6595, 65980, 51592, 158358, 6597, 2033, 55870, 54454, 4297, 9866, 27154, 55193, 23613, 8805, 54014, 11176, 6046, 8019, 1387, 55023, 9031, 2186, 7862, 10902	3654	28	5942	1.39385	1	0.993584	26.166
INTERPRO	IPR002126:Cadherin	16	0.395942	0.0165344	1003, 5097, 22883, 5098, 1952, 1951, 56121, 9746, 2195, 56105, 56133, 56123, 56122, 9752, 5101, 79633	3654	17	5942	1.53051	1	0.991059	26.4372
INTERPRO	IPR001611:Leucine-rich repeat	50	1.23732	0.0303421	23239, 392617, 79705, 84859, 284352, 9860, 25960, 10482, 84961, 127495, 10392, 55379, 25827, 55604, 23035, 10333, 79598, 56262, 10233, 4034, 55914, 114659, 55227, 79699, 23507, 6251, 9258, 9684, 84230, 116064, 80131, 26018, 5310, 8036, 114794, 65078, 55144, 386724, 5905, 26234, 57472, 79176, 144699, 26050, 143570, 114990, 222229, 84166, 23768, 79671	3654	67	5942	1.21355	1	0.999695	43.3007
INTERPRO	IPR017096:Kelch-like protein, gigaxonin	17	0.420688	0.0306095	90293, 27252, 25948, 23276, 9903, 84541, 80311, 8139, 84861, 51088, 10625, 55295, 84078, 54813, 64410, 54800, 100526832	3654	19	5942	1.45499	1	0.999511	43.588
INTERPRO	IPR008266:Tyrosine-protein kinase, active site	24	0.593912	0.0332246	157285, 1445, 2064, 2444, 79834, 22853, 1969, 7525, 112858, 2324, 7297, 3716, 2261, 84033, 3480, 558, 114783, 4919, 285220, 4920, 10188, 3643, 4233, 4067	3654	29	5942	1.34579	1	0.999577	46.3256
INTERPRO	IPR020894:Cadherin conserved site	14	0.346449	0.0347958	1003, 2195, 56133, 56123, 5097, 56105, 56122, 9752, 5098, 5101, 1952, 1951, 56121, 79633	3654	15	5942	1.51775	1	0.99953	47.9094
INTERPRO	IPR013783:Immunoglobulin-like fold	93	2.30141	0.0382896	93185, 5738, 79586, 27020, 23654, 9860, 10290, 10507, 25960, 10385, 10384, 4756, 84033, 3480, 100507436, 54910, 3106, 4920, 23077, 3054, 6398, 29990, 196740, 5796, 23022, 60484, 3136, 5792, 6091, 9308, 5361, 2324, 5362, 9870, 5364, 2261, 6405, 10725, 3643, 4790, 9019, 23129, 55558, 2057, 3140, 3597, 26018, 80263, 7869, 214, 5970, 55729, 4775, 79827, 9848, 1605, 5802, 3459, 3516, 55521, 4638, 3321…	3654	133	5942	1.13709	1	0.999657	51.2744
INTERPRO	IPR008936:Rho GTPase activation protein	32	0.791883	0.041158	153090, 51291, 23654, 57584, 9824, 9901, 51306, 116984, 10156, 4650, 57569, 257106, 394, 5361, 10928, 5362, 5364, 94134, 8831, 22821, 29, 85360, 9462, 9743, 115703, 8826, 83478, 5295, 23129, 5296, 55558, 23380	3654	41	5942	1.2692	1	0.999707	53.8824
INTERPRO	IPR000980:SH2 domain	32	0.791883	0.041158	6461, 5781, 6464, 64759, 7297, 7145, 54453, 8835, 23371, 63898, 8440, 9021, 1445, 2444, 8503, 9306, 7525, 90525, 3716, 7410, 2887, 1399, 5335, 126669, 2885, 25970, 6777, 30837, 5295, 4067, 5296, 4690	3654	41	5942	1.2692	1	0.999707	53.8824
INTERPRO	IPR015916:Galactose oxidase, beta-propeller	13	0.321703	0.0499328	90293, 51088, 10625, 57563, 55295, 54813, 114818, 27252, 54800, 23276, 3054, 100526832, 9903	3654	14	5942	1.51001	1	0.999919	61.065
INTERPRO	IPR002909:Cell surface receptor IPT/TIG	15	0.371195	0.0592154	55770, 5970, 4775, 23654, 5361, 5362, 5364, 3516, 10725, 23125, 4790, 4233, 55558, 23129, 5966	3654	17	5942	1.43485	1	0.999977	67.5051
INTERPRO	IPR016130:Protein-tyrosine phosphatase, active site	24	0.593912	0.0602357	5784, 11072, 5796, 5728, 25930, 5781, 138639, 11221, 5792, 11099, 7957, 54434, 1843, 5802, 150290, 80824, 64419, 8776, 9110, 5797, 5786, 1847, 5775, 8897	3654	30	5942	1.30093	1	0.999969	68.148
INTERPRO	IPR006652:Kelch repeat type 1	24	0.593912	0.0602357	57542, 90293, 57563, 89890, 114818, 27252, 25948, 23276, 9903, 84541, 80311, 8139, 84861, 51088, 9920, 10625, 4289, 55295, 84078, 54813, 64410, 54800, 3054, 100526832	3654	30	5942	1.30093	1	0.999969	68.148
INTERPRO	IPR001715:Calponin homology domain	28	0.692898	0.0638902	57553, 84859, 22998, 55742, 157922, 22919, 92521, 667, 89797, 79789, 10982, 8407, 4034, 6712, 29780, 6710, 23224, 8874, 6711, 6525, 57662, 23345, 5339, 85458, 23499, 7410, 8826, 9645	3654	36	5942	1.26479	1	0.999974	70.3533
INTERPRO	IPR003599:Immunoglobulin subtype	48	1.18782	0.0639592	93185, 26018, 5738, 79586, 7869, 27020, 214, 9860, 10290, 10507, 9848, 79827, 25960, 10385, 10384, 4756, 5802, 84033, 3321, 4638, 558, 54910, 4920, 5797, 3554, 29990, 196740, 386724, 5796, 23022, 4238, 54587, 60484, 5792, 6091, 11119, 9308, 2324, 6667, 55243, 2261, 6405, 4919, 23105, 567, 89932, 9019, 5819	3654	66	5942	1.18266	1	0.99996	70.3936
INTERPRO	IPR003591:Leucine-rich repeat, typical subtype	34	0.841376	0.0661119	23239, 26018, 392617, 79705, 5310, 84859, 9860, 8036, 25960, 127495, 55379, 114794, 23035, 65078, 55144, 386724, 10333, 57472, 56262, 55914, 4034, 114659, 55227, 23507, 26050, 6251, 143570, 9258, 114990, 222229, 84230, 80131, 23768, 116064	3654	45	5942	1.22866	1	0.999957	71.6226
INTERPRO	IPR011009:Protein kinase-like domain	144	3.56347	0.069388	1196, 157285, 1195, 146057, 79705, 9344, 8317, 10290, 80216, 7297, 9451, 9748, 10298, 3480, 124997, 4920, 2011, 23139, 57761, 6093, 166614, 204851, 415116, 56997, 4214, 9252, 4215, 53944, 4293, 5170, 4296, 2324, 3716, 207, 9874, 8295, 80724, 1613, 1453, 22853, 1452, 1432, 25989, 10221, 5610, 28996, 4638, 5563, 5562, 7048, 10114, 4233, 375449, 57551, 1119, 9891, 1445, 2444, 92335, 79834, 2081, 93,…	3654	215	5942	1.08915	1	0.999962	73.4009
INTERPRO	IPR001005:SANT/Myb domain	21	0.519673	0.0746277	9612, 2145, 9611, 988, 56981, 55758, 114803, 6621, 91748, 26009, 55809, 57708, 23186, 57585, 9219, 9112, 55814, 7270, 9988, 55320, 7579	3654	26	5942	1.31344	1	0.999974	76.0277
INTERPRO	IPR001214:SET domain	25	0.618659	0.0789984	2145, 79723, 56981, 56980, 11108, 10322, 7799, 84193, 114826, 639, 63977, 51111, 55870, 23067, 9739, 9757, 80854, 54904, 4297, 8085, 55209, 9869, 58508, 29072, 64324	3654	32	5942	1.27044	1	0.99998	78.0292
INTERPRO	IPR014720:Double-stranded RNA-binding-like domain	14	0.346449	0.0812898	6780, 3609, 22950, 29102, 1660, 5610, 55922, 54487, 91574, 23405, 55602, 104, 103, 6651	3654	16	5942	1.42289	1	0.999979	79.0143
INTERPRO	IPR001627:Semaphorin/CD100 antigen	14	0.346449	0.0812898	10500, 7869, 23654, 5361, 10507, 10509, 5362, 5364, 6405, 54910, 80031, 4233, 55558, 23129	3654	16	5942	1.42289	1	0.999979	79.0143
INTERPRO	IPR009057:Homeodomain-like	48	1.18782	0.0885138	23051, 100527943, 988, 1745, 114803, 6621, 1106, 55809, 57708, 8690, 54434, 1523, 54856, 60436, 9219, 51804, 100529209, 55814, 7270, 23394, 29956, 7080, 9994, 9612, 9611, 55758, 9355, 22882, 26009, 91748, 84948, 5091, 8629, 23186, 92806, 463, 7050, 9480, 147912, 6304, 79618, 9112, 9988, 283078, 55320, 23314, 6935, 5454	3654	67	5942	1.16501	1	0.999988	81.8537
INTERPRO	IPR001452:Src homology-3 domain	61	1.50953	0.0896966	57630, 50649, 26751, 51678, 9414, 64398, 84033, 80005, 11252, 152503, 6453, 6456, 8874, 9873, 4293, 4296, 64787, 28988, 23368, 23268, 9743, 7410, 115703, 2885, 10006, 153769, 4643, 4690, 9644, 221178, 27352, 23677, 10174, 4739, 51100, 79729, 9901, 79628, 23328, 8440, 51517, 8522, 7082, 344558, 1445, 2444, 375056, 5194, 7525, 7159, 94134, 1399, 10458, 5335, 10188, 23048, 4067, 5295, 5296, 85358, 2…	3654	87	5942	1.14018	1	0.999986	82.2824
INTERPRO	IPR007110:Immunoglobulin-like domain	55	1.36105	0.0956763	93185, 5738, 79586, 27020, 9860, 10507, 10290, 25960, 10385, 4756, 10384, 84033, 100507436, 54910, 3106, 4920, 388730, 6398, 29990, 196740, 23022, 5796, 60484, 3136, 5792, 6091, 9308, 2324, 2261, 6405, 9019, 3140, 26018, 7869, 214, 9848, 79827, 5802, 3321, 4638, 558, 5797, 3554, 386724, 4238, 54587, 3572, 11119, 6667, 55243, 4919, 23105, 567, 89932, 5819	3654	78	5942	1.14665	1	0.99999	84.3074
INTERPRO	IPR003595:Protein-tyrosine phosphatase, catalytic	20	0.494927	0.0961689	5784, 5783, 5796, 5728, 25930, 5781, 138639, 5792, 11099, 64759, 7145, 8073, 5802, 1843, 8776, 5797, 5786, 1847, 5775, 8897	3654	25	5942	1.30093	1	0.999987	84.4641
KEGG_PATHWAY	hsa04550:Signaling pathways regulating pluripotency of stem cells	47	1.16308	0.00334959	7703, 3720, 5894, 1432, 648, 2932, 7477, 55183, 3625, 1499, 3480, 8321, 10297, 8322, 8323, 2247, 7994, 4090, 56916, 6498, 4093, 659, 11211, 7855, 1857, 8503, 5600, 3572, 93, 5603, 5604, 3397, 652, 324, 650, 3716, 207, 7481, 2261, 9869, 463, 2885, 4089, 5295, 4609, 5296, 4086	1277	63	2286	1.3355	0.620787	0.620787	4.36012
KEGG_PATHWAY	hsa00532:Glycosaminoglycan biosynthesis - chondroitin sulfate / dermatan sulfate	11	0.27221	0.0157166	11285, 29940, 126792, 79586, 10090, 55454, 64131, 64132, 9469, 22856, 26229	1277	11	2286	1.79013	0.989726	0.898641	18.9807
KEGG_PATHWAY	hsa04360:Axon guidance	37	0.915615	0.0210518	10500, 7869, 4775, 2932, 23654, 10507, 10509, 9901, 10298, 3984, 387, 54910, 8440, 4233, 9475, 6093, 22885, 1946, 59277, 1969, 6091, 5361, 5058, 5362, 2773, 5364, 1942, 3688, 5998, 6405, 8829, 285220, 80031, 55558, 4917, 4690, 23380	1277	51	2286	1.29872	0.997864	0.871218	24.6253
KEGG_PATHWAY	hsa04630:Jak-STAT signaling pathway	24	0.593912	0.027104	8554, 3597, 6655, 8503, 3572, 5781, 2033, 7297, 3716, 207, 8835, 3459, 2885, 1387, 3454, 6777, 9021, 3566, 30837, 5295, 5296, 6654, 4609, 2057	1277	31	2286	1.38591	0.999644	0.86266	30.5872
KEGG_PATHWAY	hsa00534:Glycosaminoglycan biosynthesis - heparan sulfate / heparin	12	0.296956	0.0303616	11285, 126792, 2131, 3340, 9394, 8509, 64131, 64132, 266722, 26035, 2137, 26229	1277	13	2286	1.65243	0.999865	0.831714	33.6125
KEGG_PATHWAY	hsa05206:MicroRNAs in cancer	50	1.23732	0.0423223	6655, 4853, 5894, 648, 6464, 4851, 2475, 10298, 10297, 387, 1387, 3925, 3678, 23405, 578, 5581, 6093, 2064, 9252, 4194, 5604, 4193, 57521, 2261, 4082, 2885, 4790, 7078, 5598, 4609, 6935, 6654, 23411, 2033, 960, 7422, 4233, 659, 5728, 596, 5155, 10253, 599, 324, 4170, 7430, 994, 1399, 5335, 85414	1277	74	2286	1.20955	0.999996	0.875434	43.7058
KEGG_PATHWAY	hsa05152:Tuberculosis	39	0.965108	0.0431494	843, 842, 841, 805, 114609, 1432, 5894, 2033, 5970, 801, 5994, 8767, 5993, 56848, 9902, 4615, 1051, 3459, 387, 1387, 533, 5869, 8877, 3656, 5868, 1509, 7043, 10333, 596, 5600, 5603, 1385, 3716, 207, 7879, 3329, 9114, 8915, 4790	1277	56	2286	1.2467	0.999997	0.838141	44.3483
KEGG_PATHWAY	hsa05202:Transcriptional misregulation in cancer	42	1.03935	0.0621318	861, 860, 25942, 2130, 2005, 648, 8861, 5970, 55589, 5371, 1025, 1051, 3480, 1031, 4613, 8148, 51804, 1649, 7048, 604, 4233, 221037, 5966, 9611, 2120, 64083, 6257, 4193, 6256, 4298, 6667, 4297, 9915, 7403, 4299, 904, 4221, 85414, 4790, 4609, 4086, 2119	1277	62	2286	1.21267	1	0.901458	57.3566
KEGG_PATHWAY	hsa04014:Ras signaling pathway	51	1.26206	0.0630205	6655, 805, 5781, 5894, 6464, 801, 382, 284, 23179, 10298, 3480, 387, 2247, 10156, 1946, 5604, 100137049, 2324, 207, 8831, 2261, 1942, 2885, 2257, 3643, 4790, 6654, 5970, 56034, 9846, 83593, 2786, 7422, 55970, 5869, 5868, 4233, 5966, 55770, 8503, 5155, 1969, 5058, 10928, 22821, 9462, 5335, 5337, 81579, 5295, 5296	1277	77	2286	1.18567	1	0.876342	57.8904
KEGG_PATHWAY	hsa04917:Prolactin signaling pathway	21	0.519673	0.067233	6655, 5600, 8503, 5894, 1432, 5603, 6464, 2309, 5604, 5970, 2932, 207, 8835, 2885, 6777, 9021, 4790, 30837, 5295, 5296, 6654	1277	28	2286	1.3426	1	0.866204	60.3375
KEGG_PATHWAY	hsa04710:Circadian rhythm	14	0.346449	0.0672339	4862, 1453, 8553, 1407, 5187, 1385, 9575, 23291, 8454, 5565, 5564, 5563, 5562, 26224	1277	17	2286	1.47423	1	0.839362	60.338
KEGG_PATHWAY	hsa04015:Rap1 signaling pathway	50	1.23732	0.0757813	115, 805, 2149, 5894, 1432, 26037, 801, 56034, 51735, 84552, 284, 83593, 1499, 9223, 3480, 7422, 109, 2247, 1500, 387, 23094, 4233, 6494, 1946, 8503, 5600, 5155, 5606, 1969, 5603, 5604, 3397, 260425, 2324, 2773, 57121, 207, 2775, 2261, 1942, 3688, 9170, 1399, 5335, 2257, 7094, 3643, 56288, 5295, 5296	1277	76	2286	1.17772	1	0.850121	64.9043
KEGG_PATHWAY	hsa00562:Inositol phosphate metabolism	25	0.618659	0.085654	3706, 5728, 3628, 3705, 79837, 55361, 113026, 200576, 9562, 64768, 51477, 27124, 5335, 51763, 64419, 8776, 5298, 9110, 8867, 5287, 3631, 56623, 5286, 5297, 8897	1277	35	2286	1.27867	1	0.863398	69.5715
KEGG_PATHWAY	hsa05217:Basal cell carcinoma	20	0.494927	0.0891299	11211, 7855, 1857, 2932, 7477, 324, 652, 51684, 650, 2736, 5727, 7481, 2737, 1499, 8321, 10297, 8322, 8323, 27148, 6934	1277	27	2286	1.32602	1	0.854432	71.0731
KEGG_PATHWAY	hsa04070:Phosphatidylinositol signaling system	34	0.841376	0.0921426	3706, 805, 3705, 3628, 3709, 801, 8760, 51447, 8776, 64419, 8526, 5287, 8527, 3631, 5286, 8897, 5728, 8503, 79837, 55361, 113026, 200576, 64768, 23262, 27124, 5335, 51763, 9110, 5298, 8867, 56623, 5295, 5296, 5297	1277	50	2286	1.21729	1	0.844711	72.3188
PIR_SUPERFAMILY	PIRSF037037:kelch-like protein, gigaxonin type	17	0.420688	0.0108939	90293, 27252, 25948, 23276, 9903, 84541, 80311, 8139, 84861, 51088, 10625, 55295, 84078, 54813, 64410, 54800, 100526832	334	19	585	1.56713	0.951355	0.951355	13.4555
SMART	SM00355:ZnF_C2H2	258	6.38456	4.71758e-13	91661, 147687, 57343, 4520, 57209, 146050, 64397, 1316, 25799, 342357, 197407, 57862, 388536, 7745, 604, 6615, 22807, 146540, 7748, 147694, 58499, 146542, 54897, 3097, 3096, 54993, 7071, 54796, 55552, 58492, 170960, 641339, 7738, 374655, 9880, 7227, 51193, 126375, 388561, 163227, 7625, 148254, 253461, 388558, 7728, 152485, 348327, 23394, 7727, 49854, 55663, 8427, 55734, 55205, 101060200, 125893, …	2124	314	3309	1.28007	2.9106e-10	2.9106e-10	6.99374e-10
SMART	SM00349:KRAB	127	3.14279	7.1754e-07	10794, 90338, 91661, 54807, 147687, 57343, 57209, 163050, 90987, 342357, 25799, 163049, 388536, 54811, 7745, 146540, 51427, 147694, 7748, 91975, 146542, 55422, 284309, 79898, 55552, 58492, 170960, 7551, 7692, 7695, 641339, 7556, 90333, 7738, 7554, 220992, 51710, 100289635, 84124, 80264, 126375, 10520, 388561, 7625, 163227, 57693, 148254, 388558, 7728, 348327, 79027, 55663, 84924, 8427, 57541, 101…	2124	154	3309	1.28477	0.000442625	0.000221337	0.0010638
SMART	SM00225:BTB	65	1.60851	8.05134e-05	55709, 10206, 90293, 571, 22836, 284252, 51043, 9923, 89890, 23276, 80311, 22903, 84861, 51088, 29068, 84078, 54813, 604, 55643, 140685, 51133, 100526832, 57621, 221527, 23221, 8405, 57563, 360023, 114818, 112939, 92999, 84541, 9920, 10625, 55295, 7690, 222658, 84280, 166793, 55213, 9880, 55727, 138151, 9886, 65987, 3749, 57659, 27252, 25948, 9903, 25841, 253461, 64410, 49854, 64412, 23099, 79734…	2124	76	3309	1.33242	0.048465	0.0164232	0.1193
SMART	SM00875:SM00875	25	0.618659	0.00385897	55709, 90293, 55727, 57563, 89890, 114818, 27252, 25948, 23276, 9903, 84541, 80311, 22903, 8139, 84861, 51088, 114781, 10625, 55295, 84078, 54813, 64410, 55643, 54800, 100526832	2124	27	3309	1.44251	0.907966	0.449208	5.57107
SMART	SM00233:PH	80	1.97971	0.0138217	153090, 55785, 6655, 22874, 57480, 50649, 9922, 57584, 79990, 23207, 9826, 84033, 23370, 23550, 2245, 8527, 389072, 65059, 10156, 26030, 6093, 6645, 57569, 4651, 6453, 8874, 113026, 1796, 8831, 207, 23164, 29, 79156, 2887, 149371, 7410, 55612, 55198, 25970, 6654, 221178, 9267, 9846, 114882, 1785, 11033, 130271, 54477, 11078, 116984, 23095, 84904, 9475, 55357, 6712, 116987, 116986, 6710, 6711, 112…	2124	106	3309	1.17578	0.999814	0.820484	18.6448
SMART	SM00112:CA	16	0.395942	0.0276998	1003, 5097, 22883, 5098, 1952, 1951, 56121, 9746, 2195, 56105, 56133, 56123, 56122, 9752, 5101, 79633	2124	17	3309	1.46627	1	0.944349	34.0626
SMART	SM00297:BROMO	23	0.569166	0.0414901	6595, 65980, 51592, 6597, 2033, 55870, 54454, 4297, 9866, 27154, 55193, 23613, 8805, 54014, 11176, 6046, 8019, 1387, 55023, 9031, 2186, 7862, 10902	2124	27	3309	1.32711	1	0.976129	46.6473
SMART	SM00612:Kelch	22	0.54442	0.0539161	57542, 90293, 57563, 89890, 114818, 27252, 25948, 23276, 9903, 84541, 80311, 8139, 84861, 51088, 9920, 10625, 55295, 84078, 54813, 64410, 54800, 100526832	2124	26	3309	1.31823	1	0.986082	56.0317
SMART	SM00252:SH2	31	0.767137	0.0629711	6461, 5781, 6464, 64759, 7297, 7145, 8835, 23371, 63898, 8440, 9021, 1445, 2444, 8503, 9306, 7525, 90525, 3716, 7410, 2887, 1399, 5335, 126669, 2885, 25970, 6777, 30837, 5295, 4067, 5296, 4690	2124	39	3309	1.23834	1	0.988425	61.8743
SMART	SM00462:PTB	13	0.321703	0.0741017	1601, 6464, 64759, 323, 7145, 64787, 9270, 9882, 26119, 9910, 55198, 23371, 23294	2124	14	3309	1.44663	1	0.991351	68.0643
UP_KEYWORDS	Zinc-finger	595	14.7241	1.15452e-14	57343, 80742, 57209, 23512, 146050, 8887, 23515, 1316, 5371, 25799, 197407, 388536, 85463, 8878, 11097, 22807, 604, 146540, 6093, 84289, 27072, 58499, 146542, 23503, 26009, 55954, 8028, 7337, 50626, 10626, 58492, 641339, 374655, 11083, 5253, 51291, 7227, 51193, 27086, 388561, 148254, 2972, 388558, 58486, 85441, 6477, 90933, 79830, 23522, 8427, 55205, 101060200, 51385, 100101467, 22909, 23528, 339…	3882	806	6290	1.19613	6.53522e-12	6.53522e-12	1.69198e-11
UP_KEYWORDS	Zinc	704	17.4214	8.69829e-12	57343, 80742, 57209, 23512, 146050, 8887, 23515, 1316, 5371, 25799, 197407, 6868, 388536, 85463, 8878, 11097, 10611, 5229, 604, 22807, 146540, 6093, 84289, 27072, 58499, 146542, 23503, 26009, 8028, 55954, 7337, 50626, 10626, 58492, 641339, 374655, 11083, 5253, 23536, 51291, 7227, 51193, 27086, 388561, 148254, 2972, 388558, 58486, 85441, 6477, 90933, 811, 79830, 23522, 8427, 55205, 101060200, 5138…	3882	988	6290	1.15454	4.92322e-09	2.46161e-09	1.27441e-08
UP_KEYWORDS	Metal-binding	956	23.6575	3.63931e-08	80742, 5371, 10994, 25799, 6868, 79085, 63917, 85463, 538, 146540, 6093, 84289, 146542, 55954, 8028, 7337, 540, 50626, 339487, 641339, 84890, 374655, 51291, 314, 5352, 5351, 2972, 2979, 85441, 6477, 79830, 1445, 8427, 55205, 101060200, 79831, 100101467, 22909, 8754, 10079, 10743, 10072, 5335, 2960, 51283, 55900, 3241, 146198, 127396, 57484, 84033, 4967, 29957, 2104, 5326, 578, 29954, 84864, 63979…	3882	1408	6290	1.10015	2.05983e-05	6.86613e-06	5.33205e-05
UP_KEYWORDS	Transcription regulation	675	16.7038	4.13288e-07	57343, 2005, 57209, 23512, 146050, 3280, 1316, 5371, 25799, 221937, 197407, 388536, 1822, 10614, 2958, 22807, 604, 146540, 84289, 58499, 146542, 204851, 6882, 26009, 8028, 6884, 25788, 126626, 10629, 8726, 8725, 7343, 79618, 1810, 6878, 8019, 58492, 6777, 10725, 10620, 641339, 374655, 5253, 55213, 58487, 51497, 7227, 1432, 8031, 138151, 51193, 27086, 84193, 388561, 55922, 10732, 7332, 148254, 297…	3882	981	6290	1.11488	0.000233894	5.84786e-05	0.000605519
UP_KEYWORDS	Transcription	691	17.0997	1.75007e-06	57343, 2005, 57209, 23512, 146050, 3280, 1316, 5371, 25799, 221937, 197407, 388536, 1822, 10614, 2958, 22807, 604, 146540, 84289, 58499, 146542, 204851, 6882, 26009, 8028, 6884, 25788, 126626, 10629, 8726, 8725, 7343, 79618, 1810, 6878, 8019, 58492, 6777, 10725, 10620, 641339, 374655, 5253, 55213, 58487, 51497, 7227, 1432, 8031, 138151, 51193, 27086, 84193, 388561, 55922, 10732, 2976, 7332, 14825…	3882	1012	6290	1.10635	0.000990048	0.000198088	0.00256404
UP_KEYWORDS	DNA-binding	522	12.9176	1.85467e-06	57343, 2005, 57209, 146050, 3280, 1316, 5371, 25799, 221937, 197407, 388536, 2956, 22807, 604, 146540, 58499, 146542, 204851, 26009, 8028, 25788, 7343, 79618, 1810, 58492, 6777, 10725, 10620, 641339, 374655, 55215, 7227, 51193, 27086, 388561, 55922, 23635, 10732, 148254, 388558, 85441, 8427, 55205, 101060200, 51385, 100101467, 23528, 339327, 388567, 10608, 2961, 388569, 6595, 988, 55900, 571, 127…	3882	751	6290	1.12623	0.00104919	0.000174942	0.0027173
UP_KEYWORDS	Polymorphism	2406	59.5397	7.56689e-05	347051, 80742, 23654, 25798, 5371, 10994, 22905, 6868, 6867, 1822, 533, 22900, 63917, 2956, 538, 6498, 84079, 6494, 339201, 6093, 6091, 6882, 23646, 5362, 1429, 25788, 5364, 540, 10090, 84898, 29901, 6878, 1810, 80723, 80724, 84890, 23636, 256586, 1432, 51496, 57226, 79827, 57223, 5351, 57224, 1843, 2977, 6470, 2972, 1849, 2979, 1847, 165082, 79830, 1445, 79834, 138639, 79832, 79831, 79837, 10010…	3882	3781	6290	1.03106	0.0419259	0.00609992	0.110808
UP_KEYWORDS	Transmembrane	890	22.0243	0.0044986	84275, 347051, 84277, 55236, 23654, 25798, 8744, 10994, 90231, 8739, 29914, 3480, 79086, 79089, 6868, 3482, 79605, 128637, 533, 79085, 63917, 10712, 100302736, 538, 113444, 84287, 6091, 5361, 23646, 10099, 5362, 5364, 540, 50626, 10090, 8726, 84898, 79613, 10725, 80723, 80727, 10726, 51290, 100507321, 8760, 79827, 55219, 8763, 55218, 340348, 165082, 8754, 10079, 91137, 6482, 51283, 1836, 79633, 5…	3882	1373	6290	1.0503	0.92207	0.27312	6.39244
UP_KEYWORDS	Transmembrane helix	887	21.95	0.00492664	84275, 347051, 84277, 55236, 23654, 25798, 8744, 10994, 90231, 29914, 8739, 3480, 79086, 79089, 6868, 3482, 79605, 128637, 533, 79085, 63917, 10712, 100302736, 538, 113444, 84287, 6091, 5361, 23646, 10099, 5362, 5364, 540, 50626, 10090, 8726, 84898, 79613, 10725, 80723, 80727, 10726, 51290, 100507321, 8760, 79827, 55219, 8763, 55218, 340348, 165082, 8754, 10079, 91137, 6482, 51283, 1836, 79633, 5…	3882	1369	6290	1.04982	0.938908	0.266991	6.98041
UP_KEYWORDS	Leucine-rich repeat	62	1.53427	0.010336	23239, 392617, 79705, 84859, 284352, 9860, 25960, 10482, 84961, 127495, 55379, 10392, 388341, 25827, 10489, 84678, 26224, 55604, 54850, 23035, 10333, 79598, 56262, 10233, 55914, 4034, 388886, 114659, 55227, 79699, 23507, 6251, 9258, 9684, 84230, 219899, 80131, 116064, 26018, 5310, 8036, 22992, 114794, 80028, 65078, 55144, 386724, 5905, 79176, 57472, 26234, 144699, 26050, 143570, 114990, 23499, 22…	3882	82	6290	1.2251	0.997207	0.444597	14.1204
UP_KEYWORDS	Dioxygenase	29	0.717644	0.0167346	5253, 253982, 200424, 22992, 5352, 55256, 5351, 79701, 84964, 55818, 79068, 84678, 84842, 84266, 54681, 84864, 221037, 5927, 79831, 54583, 80853, 7403, 54790, 444, 51780, 8985, 9682, 84890, 10765	3882	35	6290	1.34253	0.999929	0.58036	21.9061
UP_KEYWORDS	Bromodomain	23	0.569166	0.0234973	6595, 65980, 51592, 6597, 2033, 55870, 54454, 4297, 9866, 27154, 55193, 23613, 8805, 54014, 11176, 6046, 8019, 1387, 55023, 9031, 2186, 7862, 10902	3882	27	6290	1.38025	0.999999	0.674215	29.4166
UP_KEYWORDS	SH2 domain	32	0.791883	0.025786	6461, 5781, 6464, 64759, 7297, 7145, 54453, 8835, 23371, 63898, 8440, 9021, 1445, 2444, 8503, 9306, 7525, 90525, 3716, 7410, 2887, 1399, 5335, 126669, 2885, 25970, 6777, 30837, 5295, 4067, 5296, 4690	3882	40	6290	1.29624	1	0.679352	31.802
UP_KEYWORDS	Signal-anchor	84	2.07869	0.0304216	253982, 11226, 79586, 11253, 2683, 8744, 4249, 113201, 79701, 80146, 55379, 3340, 25864, 1388, 63917, 26035, 8460, 26229, 53947, 30815, 9394, 149175, 84945, 2651, 23646, 124583, 9399, 444, 11285, 79158, 23478, 79694, 10090, 11282, 4121, 4124, 54923, 8869, 51435, 7841, 8693, 115650, 57451, 2131, 4779, 57462, 64131, 80758, 1889, 64132, 84750, 84752, 22856, 51109, 55568, 64757, 3895, 51809, 55454, 8…	3882	118	6290	1.15343	1	0.713208	36.4051
UP_KEYWORDS	Notch signaling pathway	22	0.54442	0.0316516	3714, 84441, 4853, 4851, 84934, 57534, 54492, 6400, 23462, 9270, 23509, 351, 23013, 6868, 55534, 3516, 113878, 79094, 63917, 23385, 102, 9794	3882	26	6290	1.37102	1	0.702883	37.5769
UP_KEYWORDS	Signal	512	12.6701	0.0351041	347051, 84277, 50999, 23654, 146433, 90231, 3480, 79086, 8321, 10618, 6868, 3482, 8322, 8323, 533, 100302736, 2852, 51368, 6780, 196463, 204851, 6091, 6786, 5361, 5362, 10099, 5364, 7481, 23509, 50626, 84898, 80727, 3597, 165215, 214, 314, 79827, 5352, 8763, 5351, 821, 374875, 410, 51295, 627, 6748, 143888, 6745, 412, 165082, 811, 813, 100133941, 285704, 1303, 8754, 6388, 118429, 6383, 6385, 8545…	3882	790	6290	1.05012	1	0.717514	40.7595
UP_KEYWORDS	Chloride	11	0.27221	0.0385021	861, 1186, 1185, 1184, 1192, 1182, 1181, 23155, 1075, 84561, 80727	3882	11	6290	1.6203	1	0.729429	43.7437
UP_KEYWORDS	Cell membrane	445	11.0121	0.0456669	23654, 152, 3480, 8321, 10618, 1729, 8322, 8323, 100302736, 2011, 8877, 538, 10611, 84079, 85461, 2852, 6093, 2013, 6091, 6786, 57217, 5361, 23507, 55361, 5362, 5364, 207, 51160, 163, 7341, 80723, 2842, 80727, 824, 100507321, 214, 314, 79827, 8763, 8766, 148252, 340348, 2979, 58480, 1445, 151473, 100133941, 59338, 324, 285704, 8754, 27297, 1832, 118429, 610, 85450, 85358, 115, 27020, 26037, 50649…	3882	686	6290	1.05107	1	0.770027	49.5829
UP_KEYWORDS	Kelch repeat	27	0.668151	0.0515896	55709, 90293, 1954, 89890, 25948, 27252, 23276, 9903, 80311, 84861, 51088, 23588, 84078, 54813, 64410, 3054, 100526832, 57542, 57563, 114818, 84541, 8139, 10625, 9920, 55295, 4289, 54800	3882	34	6290	1.28671	1	0.793589	53.9779
UP_KEYWORDS	Glycoprotein	560	13.858	0.0562921	347051, 23654, 146433, 90231, 79701, 152, 3480, 22906, 256471, 8321, 10618, 6868, 3482, 8322, 8323, 63917, 10712, 11097, 100302736, 538, 2852, 51368, 196463, 58499, 2013, 2014, 6091, 6786, 5361, 23646, 23507, 10099, 5362, 7481, 207, 5364, 23509, 10090, 84898, 8869, 2842, 80727, 23636, 3597, 165215, 214, 314, 79827, 55219, 8763, 5352, 5351, 622, 410, 627, 340348, 143888, 6745, 412, 165082, 811, 81…	3882	871	6290	1.04175	1	0.805955	57.2105
UP_KEYWORDS	Immunity	76	1.88072	0.056675	153090, 127544, 148022, 1191, 3146, 5682, 8767, 8638, 22933, 5371, 51734, 146433, 10384, 3434, 4615, 10392, 80149, 100507436, 3437, 100302736, 8878, 3106, 6397, 2150, 604, 2852, 55718, 5581, 10333, 56957, 639, 81622, 3136, 85363, 9711, 28988, 171568, 10475, 58509, 1654, 54923, 3140, 8888, 115650, 3661, 114609, 214, 10270, 5610, 7187, 54472, 66005, 558, 1540, 51295, 104, 103, 23098, 4940, 1445, 46…	3882	108	6290	1.14021	1	0.792479	57.4641
UP_KEYWORDS	Alternative splicing	2476	61.272	0.0575975	80742, 5371, 90231, 22905, 29914, 22906, 22903, 6868, 6867, 25794, 63915, 533, 22900, 63917, 100302736, 2956, 538, 6498, 1827, 6091, 6882, 10099, 5362, 1429, 25788, 5364, 5366, 540, 10092, 84898, 29901, 10097, 6878, 80724, 80727, 256586, 51497, 1432, 51496, 5352, 57223, 5351, 79828, 57224, 23635, 374875, 2977, 2976, 6470, 2972, 6477, 165082, 138639, 79832, 79831, 79837, 100101467, 22909, 10079, 5…	3882	3963	6290	1.01233	1	0.782643	58.0695
UP_KEYWORDS	Symport	22	0.54442	0.0601915	347051, 151473, 5250, 6509, 6558, 220963, 6536, 6505, 81539, 84561, 54407, 201232, 9187, 8273, 6533, 123041, 6566, 6564, 6575, 9962, 9120, 6560	3882	27	6290	1.32024	1	0.782963	59.7291
UP_KEYWORDS	Homeobox	24	0.593912	0.0632712	23051, 100527943, 204851, 9355, 1745, 22882, 10194, 1523, 463, 60436, 7050, 28996, 9480, 6304, 147912, 79618, 51804, 23394, 283078, 23314, 6935, 29956, 5454, 7080	3882	30	6290	1.29624	1	0.785928	61.6199
UP_KEYWORDS	Activator	200	4.94927	0.0802965	3725, 4799, 57343, 4520, 4205, 2005, 1316, 9862, 5371, 221937, 57862, 4613, 7161, 22807, 604, 84289, 3096, 7343, 10725, 6777, 23125, 4790, 4609, 5253, 4779, 8031, 55729, 4775, 84498, 84193, 359948, 7041, 23013, 1998, 253461, 2972, 4784, 4782, 4781, 85441, 7182, 9994, 23522, 51586, 55870, 2309, 80854, 10743, 10499, 55534, 7716, 9988, 6595, 988, 571, 26039, 4853, 6597, 4851, 80306, 10957, 23373, 79…	3882	303	6290	1.0695	1	0.84969	70.6645
UP_KEYWORDS	SH3 domain	63	1.55902	0.0949914	57630, 50649, 26751, 51678, 9414, 64398, 84033, 80005, 11252, 152503, 6453, 6456, 8874, 9873, 4293, 4296, 64787, 28988, 23368, 23268, 9743, 7410, 115703, 2885, 10006, 153769, 4643, 4690, 9644, 221178, 27352, 23677, 10174, 4739, 51100, 79729, 9901, 667, 79628, 23328, 8440, 51517, 7082, 8522, 344558, 1445, 2444, 375056, 5194, 7525, 7159, 94134, 23499, 1399, 10458, 5335, 10188, 23048, 4067, 5295, 52…	3882	90	6290	1.13421	1	0.886142	76.8311
UP_KEYWORDS	Repressor	189	4.67706	0.0971083	2145, 4799, 7536, 23512, 2005, 3720, 3280, 23462, 6421, 221937, 1523, 23309, 23272, 10614, 84678, 81628, 604, 171023, 54815, 51564, 1488, 91975, 26155, 55758, 22882, 23269, 25788, 112939, 5036, 1982, 9869, 51621, 11007, 1616, 11338, 7071, 8726, 342371, 79618, 8725, 161882, 1810, 7690, 6015, 4221, 7692, 7695, 64324, 23314, 7555, 51592, 26145, 7227, 26065, 51497, 8553, 55729, 138151, 51193, 27086, …	3882	287	6290	1.06703	1	0.882512	77.6125
UP_KEYWORDS	Protein phosphatase	44	1.08884	0.0976262	23239, 57460, 5784, 11072, 5783, 5781, 11221, 51496, 11099, 9829, 8073, 54434, 29101, 5802, 1843, 152926, 283871, 23371, 5797, 1849, 1847, 5775, 8897, 23035, 5728, 5796, 25930, 54704, 138639, 10217, 5792, 2140, 7957, 79871, 22843, 150290, 994, 80824, 5496, 9110, 58190, 5786, 285193, 10106	3882	61	6290	1.16874	1	0.874637	77.8
UP_SEQ_FEATURE	zinc finger region:C2H2-type 4	207	5.12249	6.98675e-16	91661, 147687, 57343, 4520, 57209, 146050, 25799, 342357, 197407, 57862, 388536, 7745, 604, 22807, 146540, 147694, 7748, 58499, 146542, 54897, 3097, 3096, 54993, 54796, 55552, 58492, 170960, 641339, 7738, 374655, 9880, 7227, 51193, 126375, 388561, 163227, 7625, 148254, 253461, 388558, 7728, 152485, 348327, 23394, 8427, 55205, 55734, 125893, 51385, 100101467, 339327, 388569, 353274, 7716, 55900, 1…	3830	243	6215	1.38231	5.03131e-12	5.03131e-12	1.32117e-12
UP_SEQ_FEATURE	zinc finger region:C2H2-type 3	218	5.3947	9.47284e-15	91661, 147687, 57343, 4520, 57209, 146050, 1316, 25799, 342357, 197407, 57862, 388536, 7745, 604, 6615, 22807, 146540, 147694, 7748, 58499, 146542, 54897, 3097, 3096, 54993, 7071, 54796, 55552, 58492, 641339, 7738, 374655, 51193, 126375, 388561, 163227, 7625, 148254, 253461, 388558, 7728, 152485, 348327, 23394, 7727, 49854, 55663, 8427, 55205, 55734, 125893, 51385, 100101467, 23528, 339327, 38856…	3830	261	6215	1.35537	7.12769e-11	3.56384e-11	1.87406e-11
UP_SEQ_FEATURE	zinc finger region:C2H2-type 5	193	4.77605	2.73454e-14	91661, 57343, 4520, 57209, 146050, 342357, 25799, 197407, 57862, 388536, 7745, 604, 22807, 147694, 7748, 146540, 58499, 54897, 146542, 3096, 54993, 55552, 58492, 641339, 7738, 374655, 9880, 7227, 51193, 126375, 388561, 163227, 7625, 148254, 253461, 388558, 152485, 7728, 348327, 49854, 8427, 55205, 55734, 125893, 100101467, 339327, 388569, 353274, 7716, 55900, 146198, 127396, 84307, 162239, 79230,…	3830	228	6215	1.37361	2.06284e-10	6.87612e-11	5.42344e-11
UP_SEQ_FEATURE	zinc finger region:C2H2-type 8	150	3.71195	6.28626e-14	10794, 90338, 54807, 147687, 6018, 57343, 57209, 9923, 163050, 90987, 25799, 197407, 163049, 388536, 54811, 7745, 7543, 7748, 147694, 91975, 58499, 54897, 360023, 54993, 55422, 284309, 79898, 79692, 92999, 79894, 55552, 58492, 7693, 170960, 7692, 7551, 7695, 641339, 9640, 90333, 7556, 7738, 220992, 374655, 51710, 100289635, 56980, 51193, 126375, 80264, 10520, 388561, 7625, 163227, 57693, 148254, …	3830	171	6215	1.42343	4.7462e-10	1.18655e-10	1.24778e-10
UP_SEQ_FEATURE	zinc finger region:C2H2-type 7	167	4.13264	8.51281e-14	10794, 84146, 91661, 90338, 54807, 147687, 6018, 57343, 57209, 9923, 163050, 90987, 25799, 197407, 163049, 388536, 54811, 7745, 7543, 146540, 51427, 7748, 147694, 91975, 58499, 146542, 54897, 360023, 54993, 55422, 284309, 79898, 79692, 92999, 79894, 55552, 58492, 7693, 170960, 7692, 7551, 7695, 641339, 9640, 90333, 7556, 7738, 220992, 7554, 374655, 51710, 9880, 100289635, 56980, 7227, 84124, 5119…	3830	194	6215	1.39687	6.43169e-10	1.28634e-10	1.69087e-10
UP_SEQ_FEATURE	zinc finger region:C2H2-type 6	178	4.40485	2.47097e-13	10794, 84146, 91661, 90338, 54807, 147687, 6018, 57343, 4520, 57209, 146050, 9923, 163050, 51222, 90987, 342357, 25799, 197407, 163049, 388536, 54811, 7745, 7543, 22807, 604, 146540, 7748, 147694, 91975, 58499, 146542, 54897, 360023, 54993, 55422, 284309, 79898, 79692, 92999, 54925, 79894, 55552, 7690, 58492, 7693, 170960, 7692, 7551, 7695, 641339, 9640, 90333, 7556, 7738, 220992, 7554, 374655, 5…	3830	210	6215	1.37544	1.86662e-09	3.11103e-10	4.9073e-10
UP_SEQ_FEATURE	zinc finger region:C2H2-type 2	212	5.24623	3.15607e-13	91661, 147687, 57343, 4520, 57209, 146050, 1316, 25799, 342357, 197407, 57862, 388536, 7745, 604, 6615, 22807, 146540, 147694, 58499, 146542, 54897, 3097, 3096, 54993, 7071, 54796, 55552, 58492, 170960, 641339, 7738, 374655, 51193, 388561, 163227, 7625, 148254, 388558, 152485, 348327, 7727, 49854, 55663, 8427, 55734, 125893, 51385, 100101467, 23528, 339327, 388569, 353274, 7716, 55900, 146198, 12…	3830	257	6215	1.33858	2.384e-09	3.40572e-10	6.26754e-10
UP_SEQ_FEATURE	zinc finger region:C2H2-type 1	193	4.77605	9.43857e-12	147687, 57343, 4520, 146050, 1316, 25799, 342357, 197407, 57862, 7745, 604, 6615, 22807, 147694, 7748, 146540, 58499, 54897, 146542, 3097, 3096, 54993, 7071, 54796, 55552, 58492, 641339, 7738, 374655, 9880, 51193, 126375, 7625, 253461, 152485, 348327, 23394, 7727, 49854, 55663, 8427, 55734, 125893, 51385, 100101467, 23528, 339327, 388569, 353274, 7716, 55900, 146198, 127396, 7988, 84307, 162239, …	3830	235	6215	1.3327	7.12894e-08	8.91118e-09	1.87419e-08
UP_SEQ_FEATURE	zinc finger region:C2H2-type 9	132	3.26652	9.38294e-11	10794, 90338, 91661, 54807, 147687, 6018, 57343, 9923, 163050, 90987, 25799, 197407, 163049, 388536, 7745, 7543, 147694, 7748, 91975, 58499, 360023, 54993, 55422, 284309, 79898, 79692, 92999, 79894, 55552, 58492, 7693, 170960, 7692, 7695, 641339, 9640, 7556, 90333, 7738, 220992, 374655, 51710, 100289635, 56980, 80264, 126375, 10520, 388561, 7625, 163227, 57693, 148254, 253461, 388558, 7728, 15248…	3830	154	6215	1.3909	7.08693e-07	7.87437e-08	1.86315e-07
UP_SEQ_FEATURE	zinc finger region:C2H2-type 10	119	2.94482	4.12351e-10	10794, 90338, 91661, 54807, 147687, 57343, 6018, 9923, 163050, 90987, 197407, 163049, 388536, 7543, 51427, 147694, 7748, 91975, 58499, 360023, 54993, 55422, 79898, 79894, 55552, 58492, 170960, 7693, 7692, 641339, 7695, 9640, 7556, 90333, 7738, 220992, 374655, 51710, 100289635, 56980, 80264, 126375, 10520, 388561, 7625, 163227, 57693, 148254, 253461, 388558, 7728, 348327, 64412, 84905, 84922, 5573…	3830	138	6215	1.3993	3.11448e-06	3.11449e-07	8.18796e-07
UP_SEQ_FEATURE	zinc finger region:C2H2-type 11	107	2.64786	1.24678e-09	10794, 90338, 147687, 54807, 57343, 6018, 163050, 90987, 197407, 163049, 388536, 7543, 51427, 147694, 91975, 58499, 360023, 54993, 284309, 55422, 79898, 79894, 58492, 170960, 7693, 7692, 641339, 7695, 90333, 7738, 220992, 374655, 51710, 100289635, 80264, 126375, 10520, 388561, 7625, 163227, 57693, 148254, 388558, 7728, 348327, 84905, 84922, 55205, 55734, 57547, 125893, 90592, 27107, 339327, 84622…	3830	123	6215	1.41163	9.41687e-06	8.56083e-07	2.4757e-06
UP_SEQ_FEATURE	zinc finger region:C2H2-type 12	92	2.27666	3.47142e-09	7701, 90338, 147687, 6018, 57343, 340252, 146198, 9923, 163050, 126068, 25925, 197407, 163049, 10308, 388536, 7543, 126070, 91975, 197320, 58499, 63977, 7587, 6940, 342132, 57623, 339500, 360023, 54993, 55422, 79898, 25888, 79894, 55552, 23361, 116115, 89887, 58492, 170960, 7692, 7695, 7738, 9310, 7637, 51710, 7571, 347344, 7574, 100289635, 126375, 7771, 344787, 10520, 388561, 7770, 163227, 7625,…	3830	104	6215	1.43548	2.62193e-05	2.18497e-06	6.89312e-06
UP_SEQ_FEATURE	domain:KRAB	119	2.94482	1.55328e-08	10794, 90338, 91661, 147687, 54807, 57343, 57209, 163050, 90987, 342357, 25799, 163049, 388536, 54811, 7745, 146540, 147694, 7748, 91975, 146542, 284309, 55422, 79898, 54925, 55552, 58492, 7551, 7692, 641339, 7695, 7556, 90333, 7738, 7554, 220992, 51710, 100289635, 84124, 80264, 126375, 10520, 388561, 7625, 163227, 57693, 148254, 388558, 7728, 348327, 55663, 84924, 8427, 57541, 57547, 285268, 125…	3830	142	6215	1.35988	0.000117313	9.02454e-06	3.08432e-05
UP_SEQ_FEATURE	zinc finger region:C2H2-type 13	72	1.78174	5.15549e-08	7701, 90338, 147687, 6018, 57343, 146198, 163050, 126068, 90987, 163049, 10308, 388536, 7543, 51427, 197320, 58499, 63977, 6940, 57623, 339500, 360023, 54993, 25888, 79894, 55552, 23361, 116115, 89887, 7692, 7695, 9640, 7738, 9310, 7637, 51710, 7571, 7574, 100289635, 126375, 7771, 388561, 7770, 57786, 57693, 6239, 148254, 388558, 7728, 55628, 348327, 162993, 7562, 57474, 7561, 55734, 163081, 1713…	3830	80	6215	1.46044	0.000389318	2.78135e-05	0.000102371
UP_SEQ_FEATURE	compositionally biased region:Ser-rich	168	4.15739	1.22944e-06	1003, 114823, 29123, 114825, 146057, 23131, 9344, 54492, 1106, 80216, 29855, 92521, 1105, 124245, 23274, 9857, 10297, 10921, 57670, 8878, 11097, 253260, 23077, 85461, 54819, 54894, 3858, 57569, 166614, 3097, 57665, 4293, 9739, 22985, 23268, 80223, 51621, 203286, 27124, 125058, 27125, 8019, 10725, 84280, 10620, 23125, 9646, 9644, 25831, 8554, 81610, 92345, 283450, 114804, 79827, 9887, 9882, 55164,…	3830	218	6215	1.25053	0.00924299	0.000618873	0.00244124
UP_SEQ_FEATURE	zinc finger region:C2H2-type 14	54	1.3363	3.86041e-06	7701, 90338, 57343, 6018, 163050, 126068, 25925, 163049, 10308, 51427, 197320, 58499, 63977, 339500, 360023, 54993, 25888, 79894, 55552, 23361, 89887, 170960, 7692, 7695, 9310, 7738, 7637, 51710, 7571, 100289635, 344787, 7771, 7770, 57786, 6239, 148254, 388558, 7728, 7562, 163081, 171392, 7561, 57547, 125893, 90592, 84622, 339327, 9668, 463, 284370, 353274, 90075, 10780, 10781	3830	60	6215	1.46044	0.0287367	0.0018207	0.00766524
UP_SEQ_FEATURE	zinc finger region:C2H2-type 15	47	1.16308	1.59922e-05	51710, 7571, 7701, 90338, 57343, 100289635, 163050, 126068, 25925, 7771, 388561, 7770, 163049, 57786, 10308, 6239, 148254, 388558, 7728, 55628, 51427, 7562, 197320, 58499, 7561, 63977, 171392, 163081, 57547, 125893, 57623, 90592, 84622, 339327, 9668, 25888, 463, 284370, 55552, 23361, 89887, 170960, 90075, 9310, 7738, 7637, 10780	3830	52	6215	1.46669	0.11378	0.00708011	0.0317505
UP_SEQ_FEATURE	domain:BTB	60	1.48478	2.86735e-05	55709, 10206, 90293, 571, 284252, 51043, 9923, 89890, 23276, 80311, 22903, 84861, 51088, 29068, 84078, 54813, 604, 55643, 140685, 51133, 57621, 221527, 8405, 57563, 360023, 114818, 112939, 84541, 10625, 9920, 55295, 7690, 222658, 84280, 79798, 166793, 9880, 138151, 65987, 27252, 25948, 57659, 9903, 130535, 25841, 253461, 64410, 49854, 64412, 23099, 79734, 57542, 84464, 147040, 27107, 57684, 8139,…	3830	70	6215	1.3909	0.194727	0.0119598	0.056921
UP_SEQ_FEATURE	topological domain:Cytoplasmic	479	11.8535	4.634e-05	347051, 50999, 23654, 8744, 90231, 79701, 152, 3480, 256471, 79086, 55379, 8321, 10618, 6868, 3482, 8322, 8323, 388531, 533, 63917, 538, 2852, 84287, 6091, 6786, 5361, 23646, 5362, 10099, 5364, 540, 10090, 84898, 8869, 2842, 80727, 115650, 3597, 23530, 51290, 165215, 214, 79827, 8763, 821, 8303, 90522, 340348, 6748, 6745, 165082, 412, 151473, 224, 8754, 10079, 118429, 610, 6383, 6385, 58475, 5128…	3830	699	6215	1.11199	0.295322	0.0182532	0.0919762
UP_SEQ_FEATURE	zinc finger region:C2H2-type 16	37	0.915615	6.08714e-05	51710, 7571, 7701, 90338, 57343, 100289635, 126068, 25925, 7771, 388561, 7770, 163049, 57786, 388558, 55628, 51427, 197320, 58499, 63977, 7561, 57547, 57623, 90592, 339327, 9668, 25888, 463, 284370, 55552, 23361, 89887, 170960, 90075, 9310, 7738, 7637, 10780	3830	40	6215	1.50101	0.368575	0.0227266	0.120802
UP_SEQ_FEATURE	sequence variant	2425	60.0099	0.000778856	347051, 80742, 23654, 25798, 5371, 10994, 22905, 29914, 6868, 6867, 1822, 533, 22900, 63917, 2956, 538, 6498, 84079, 6494, 113444, 339201, 6093, 6091, 6882, 5362, 1429, 25788, 5364, 540, 10090, 84898, 6878, 1810, 80723, 80724, 84890, 23636, 256586, 1432, 51496, 57226, 79827, 5352, 57223, 5351, 57224, 1843, 2977, 6470, 2972, 1849, 2979, 1847, 165082, 79830, 1445, 79834, 138639, 79832, 79831, 12886…	3830	3838	6215	1.0253	0.997219	0.244396	1.53525
UP_SEQ_FEATURE	zinc finger region:C2H2-type 17	30	0.74239	0.000860481	51710, 7701, 7571, 90338, 100289635, 126068, 25925, 7771, 388561, 7770, 163049, 388558, 55628, 197320, 58499, 7561, 57547, 57623, 90592, 339327, 84622, 25888, 463, 284370, 23361, 170960, 90075, 7738, 7637, 10780	3830	33	6215	1.4752	0.9985	0.255875	1.69485
UP_SEQ_FEATURE	splice variant	1813	44.8651	0.00142582	80742, 5371, 90231, 10994, 29914, 22905, 22906, 6868, 6867, 63915, 63917, 22900, 538, 2956, 6498, 1827, 6091, 5362, 5364, 540, 10092, 84898, 6878, 80724, 80727, 256586, 1432, 51497, 51496, 5352, 57223, 79828, 374875, 2977, 2976, 6470, 2972, 1849, 6477, 165082, 138639, 79832, 79831, 100101467, 22909, 10079, 5339, 22911, 1832, 10072, 5335, 5337, 22916, 55486, 63027, 84859, 55471, 84033, 84861, 2995…	3830	2848	6215	1.033	0.999979	0.374097	2.79348
UP_SEQ_FEATURE	zinc finger region:C2H2-type 1; degenerate	34	0.841376	0.00158232	51710, 7571, 91661, 115509, 54807, 57209, 25925, 344787, 7771, 388561, 163227, 388536, 148254, 388558, 162993, 54811, 115196, 84924, 7562, 126070, 197320, 55205, 171392, 163081, 7587, 284309, 51351, 170960, 7695, 90333, 9310, 90075, 10780, 10781	3830	39	6215	1.41467	0.999994	0.392476	3.09554
UP_SEQ_FEATURE	transmembrane region	772	19.1042	0.00159287	347051, 84275, 23654, 25798, 8744, 10994, 90231, 29914, 3480, 79086, 79089, 6868, 3482, 128637, 79605, 533, 79085, 63917, 10712, 538, 113444, 84287, 6091, 5361, 23646, 10099, 5362, 5364, 540, 10090, 84898, 79613, 80723, 80727, 51290, 8760, 79827, 55219, 8763, 340348, 165082, 8754, 10079, 91137, 6482, 51283, 79633, 1836, 55486, 55901, 63027, 57484, 113201, 121457, 51272, 29957, 8460, 578, 29954, 2…	3830	1179	6215	1.06254	0.999994	0.38222	3.11588
UP_SEQ_FEATURE	repeat:LRR 5	49	1.21257	0.00174966	23239, 392617, 79705, 84859, 9860, 25960, 84961, 127495, 10392, 55379, 25827, 10489, 55604, 23035, 54850, 10333, 79598, 56262, 10233, 4034, 55914, 23224, 114659, 55227, 23507, 6251, 9258, 9684, 219899, 84230, 116064, 80131, 26018, 5310, 8036, 114794, 65078, 386724, 55144, 5905, 144699, 26050, 1062, 143570, 114990, 85459, 84166, 26235, 23768	3830	60	6215	1.32522	0.999998	0.398736	3.41753
UP_SEQ_FEATURE	repeat:LRR 6	43	1.06409	0.0023962	23239, 26018, 392617, 79705, 5310, 84859, 9860, 8036, 84961, 127495, 10392, 25827, 10489, 55604, 65078, 23035, 55144, 10333, 386724, 5905, 79598, 56262, 55914, 144699, 4034, 23224, 55227, 23507, 26050, 1062, 6251, 114990, 9258, 143570, 85459, 9684, 84230, 219899, 84166, 26235, 80131, 23768, 116064	3830	52	6215	1.34186	1	0.488863	4.65209
UP_SEQ_FEATURE	topological domain:Extracellular	312	7.72086	0.00263985	347051, 10347, 5738, 9860, 23654, 8744, 90231, 143458, 56246, 152, 79086, 3480, 256471, 8321, 10618, 6868, 8322, 8323, 80208, 41, 388531, 538, 388730, 2852, 10333, 54894, 3714, 54896, 6091, 6786, 5361, 2324, 5362, 10099, 5364, 540, 84898, 2842, 23129, 80727, 55558, 115650, 3597, 165215, 214, 79827, 8763, 3949, 90522, 9197, 340348, 7048, 4233, 165082, 151473, 375056, 4238, 1464, 53616, 8754, 10079…	3830	459	6215	1.10302	1	0.509849	5.11346
UP_SEQ_FEATURE	zinc finger region:C2H2-type 19	23	0.569166	0.00374472	7701, 197320, 90338, 58499, 7561, 57547, 57623, 126068, 25925, 339327, 84622, 388561, 7770, 25888, 463, 284370, 23361, 388558, 170960, 55628, 7738, 7637, 10780	3830	25	6215	1.4929	1	0.623613	7.17903
UP_SEQ_FEATURE	repeat:LRR 3	61	1.50953	0.00482412	23239, 392617, 79705, 84859, 9860, 25960, 10482, 84961, 127495, 55379, 10392, 25827, 80208, 10489, 84678, 26224, 55604, 54850, 23035, 10333, 79598, 56262, 10233, 55914, 4034, 114659, 23224, 55227, 79699, 23507, 6251, 9258, 9684, 84230, 219899, 80131, 116064, 26018, 5310, 8036, 22992, 114794, 80028, 65078, 55144, 386724, 5905, 57472, 26234, 144699, 54875, 26050, 1062, 143570, 114990, 85459, 222229…	3830	79	6215	1.25298	1	0.704028	9.15571
UP_SEQ_FEATURE	repeat:LRR 9	30	0.74239	0.00576164	23239, 26018, 79705, 84859, 9860, 8036, 127495, 84961, 10392, 25827, 55604, 23035, 65078, 55144, 10333, 56262, 55914, 4034, 23224, 55227, 23507, 26050, 1062, 9258, 114990, 84230, 84166, 80131, 116064, 23768	3830	35	6215	1.3909	1	0.755333	10.8401
UP_SEQ_FEATURE	repeat:LRR 1	64	1.58377	0.00646392	23239, 392617, 79705, 84859, 9860, 25960, 10482, 84961, 127495, 55379, 10392, 388341, 25827, 80208, 10489, 84678, 26224, 55604, 54850, 23035, 10333, 79598, 56262, 10233, 55914, 4034, 388886, 114659, 23224, 55227, 79699, 23507, 6251, 9258, 9684, 84230, 219899, 80131, 116064, 26018, 5310, 283450, 8036, 22992, 114794, 80028, 65078, 55144, 386724, 5905, 57472, 26234, 144699, 54875, 26050, 1062, 14357…	3830	84	6215	1.23635	1	0.783603	12.0823
UP_SEQ_FEATURE	repeat:LRR 2	64	1.58377	0.00646392	23239, 392617, 79705, 84859, 9860, 25960, 10482, 84961, 127495, 55379, 10392, 388341, 25827, 80208, 10489, 84678, 26224, 55604, 54850, 23035, 10333, 79598, 56262, 10233, 55914, 4034, 388886, 114659, 23224, 55227, 79699, 23507, 6251, 9258, 9684, 84230, 219899, 80131, 116064, 26018, 5310, 283450, 8036, 22992, 114794, 80028, 65078, 55144, 386724, 5905, 57472, 26234, 144699, 54875, 26050, 1062, 14357…	3830	84	6215	1.23635	1	0.783603	12.0823
UP_SEQ_FEATURE	repeat:LRR 7	34	0.841376	0.0077754	23239, 26018, 79705, 84859, 9860, 8036, 84961, 127495, 10392, 25827, 10489, 55604, 65078, 23035, 55144, 10333, 56262, 55914, 4034, 23224, 55227, 23507, 26050, 1062, 6251, 9258, 114990, 85459, 84230, 84166, 26235, 80131, 23768, 116064	3830	41	6215	1.34567	1	0.832468	14.3583
UP_SEQ_FEATURE	repeat:LRR 4	54	1.3363	0.0087867	23239, 392617, 79705, 84859, 9860, 25960, 10482, 127495, 84961, 10392, 55379, 25827, 10489, 84678, 26224, 55604, 54850, 23035, 10333, 79598, 56262, 10233, 55914, 4034, 114659, 23224, 55227, 23507, 6251, 9258, 9684, 84230, 219899, 80131, 116064, 26018, 5310, 8036, 114794, 65078, 55144, 386724, 5905, 26234, 144699, 26050, 1062, 114990, 143570, 85459, 84166, 26235, 79671, 23768	3830	70	6215	1.25181	1	0.859221	16.075
UP_SEQ_FEATURE	repeat:LRR 8	31	0.767137	0.00914058	23239, 26018, 79705, 84859, 9860, 8036, 127495, 84961, 10392, 25827, 55604, 23035, 65078, 55144, 10333, 56262, 55914, 4034, 23224, 55227, 23507, 26050, 1062, 9258, 114990, 84230, 84166, 26235, 80131, 23768, 116064	3830	37	6215	1.35957	1	0.862153	16.668
UP_SEQ_FEATURE	zinc finger region:C2H2-type 2; degenerate	23	0.569166	0.0101506	51710, 197320, 55205, 54807, 7587, 57541, 171392, 7561, 22834, 57623, 126375, 7771, 2736, 284309, 92999, 25888, 80110, 253461, 23300, 7693, 162993, 7748, 10781	3830	26	6215	1.43548	1	0.882409	18.3386
UP_SEQ_FEATURE	glycosylation site:N-linked (GlcNAc...)	522	12.9176	0.0119067	347051, 23654, 146433, 90231, 79701, 152, 3480, 8321, 10618, 6868, 3482, 8322, 8323, 63917, 10712, 538, 2852, 51368, 196463, 2013, 2014, 6091, 6786, 5361, 23646, 23507, 5362, 10099, 5364, 7481, 23509, 10090, 84898, 8869, 2842, 80727, 3597, 165215, 214, 314, 79827, 55219, 5352, 8763, 5351, 410, 627, 340348, 143888, 6745, 412, 165082, 811, 813, 100133941, 285704, 1303, 8754, 118429, 610, 85450, 512…	3830	798	6215	1.06148	1	0.913288	21.1677
UP_SEQ_FEATURE	zinc finger region:C2H2-type 18	22	0.54442	0.0141577	7701, 90338, 7561, 57547, 57623, 126068, 90592, 25925, 339327, 84622, 388561, 7770, 25888, 284370, 23361, 388558, 170960, 55628, 90075, 7738, 7637, 10780	3830	25	6215	1.42799	1	0.941231	24.6582
UP_SEQ_FEATURE	domain:PH	72	1.78174	0.0155721	153090, 23239, 6655, 22874, 57480, 50649, 9922, 57584, 79990, 23207, 9826, 57679, 84033, 23370, 23550, 8527, 65059, 10156, 26030, 23035, 6093, 57569, 6453, 8874, 5170, 113026, 257068, 1796, 8831, 207, 29, 79156, 2887, 7410, 149371, 55612, 55198, 25970, 6654, 221178, 9267, 9846, 114882, 1785, 54477, 11078, 23095, 84904, 9475, 55357, 6712, 116987, 116986, 6711, 11214, 94134, 11113, 22821, 54443, 84…	3830	98	6215	1.1922	1	0.952143	26.7759
UP_SEQ_FEATURE	repeat:LRR 10	24	0.593912	0.0169169	55144, 23239, 10333, 26018, 56262, 79705, 55914, 23224, 55227, 9860, 23507, 8036, 26050, 1062, 9258, 114990, 84961, 25827, 84230, 55604, 84166, 80131, 23768, 23035	3830	28	6215	1.3909	1	0.960112	28.7368
UP_SEQ_FEATURE	domain:Cadherin 1	16	0.395942	0.0169808	1003, 5097, 22883, 5098, 1952, 1951, 56121, 9746, 2195, 56105, 56133, 56123, 56122, 9752, 5101, 79633	3830	17	6215	1.52726	1	0.957364	28.8286
UP_SEQ_FEATURE	domain:Cadherin 2	16	0.395942	0.0169808	1003, 5097, 22883, 5098, 1952, 1951, 56121, 9746, 2195, 56105, 56133, 56123, 56122, 9752, 5101, 79633	3830	17	6215	1.52726	1	0.957364	28.8286
UP_SEQ_FEATURE	topological domain:Lumenal	127	3.14279	0.0182681	51573, 79586, 50999, 9451, 488, 79701, 1523, 55379, 3340, 3482, 1388, 11014, 533, 63917, 7542, 10134, 55850, 53947, 84287, 30815, 149175, 2651, 124583, 23646, 1798, 10908, 11285, 23478, 79694, 10090, 11282, 4121, 4124, 10478, 8869, 55650, 3995, 112770, 54732, 64131, 64132, 51290, 6400, 22856, 821, 94005, 3895, 92140, 51304, 51809, 81562, 51614, 23423, 81555, 6748, 54681, 10113, 6745, 412, 7112, 9…	3830	182	6215	1.13233	1	0.963687	30.6566
UP_SEQ_FEATURE	repeat:LRR 11	23	0.569166	0.0229711	55144, 23239, 10333, 26018, 56262, 79705, 55914, 23224, 55227, 9860, 23507, 8036, 26050, 1062, 9258, 114990, 84961, 25827, 84230, 55604, 84166, 80131, 23035	3830	27	6215	1.38231	1	0.983126	36.9633
UP_SEQ_FEATURE	zinc finger region:C2H2-type 1; atypical	17	0.420688	0.0314125	51710, 57473, 57541, 7227, 11108, 64397, 126068, 57659, 27300, 79692, 80110, 7728, 9640, 7556, 84905, 51427, 23099	3830	19	6215	1.4519	1	0.995825	46.9406
UP_SEQ_FEATURE	compositionally biased region:Pro-rich	288	7.12695	0.0332345	29123, 80742, 4520, 3280, 6621, 5371, 10482, 55740, 9866, 221937, 124245, 197407, 84674, 84678, 607, 54894, 166614, 54897, 55758, 55957, 54991, 5364, 23268, 54790, 26003, 54796, 342371, 100170841, 56928, 8867, 11083, 374655, 5253, 55728, 55727, 51291, 92345, 57224, 9883, 23635, 359948, 388610, 23013, 10081, 54476, 152485, 375449, 55663, 23524, 6764, 375056, 51586, 79834, 55870, 54877, 8045, 10318…	3830	436	6215	1.07189	1	0.996563	48.8878
UP_SEQ_FEATURE	domain:Cadherin 5	14	0.346449	0.0355841	1003, 2195, 56133, 56123, 5097, 56105, 56122, 9752, 5098, 5101, 1952, 1951, 56121, 79633	3830	15	6215	1.51453	1	0.997392	51.2987
UP_SEQ_FEATURE	domain:Cadherin 4	14	0.346449	0.0355841	1003, 2195, 56133, 56123, 5097, 56105, 56122, 9752, 5098, 5101, 1952, 1951, 56121, 79633	3830	15	6215	1.51453	1	0.997392	51.2987
UP_SEQ_FEATURE	domain:Cadherin 3	14	0.346449	0.0355841	1003, 2195, 56133, 56123, 5097, 56105, 56122, 9752, 5098, 5101, 1952, 1951, 56121, 79633	3830	15	6215	1.51453	1	0.997392	51.2987
UP_SEQ_FEATURE	compositionally biased region:Poly-Lys	71	1.75699	0.0364762	57482, 6597, 1108, 9510, 5994, 27332, 23207, 9748, 23613, 54856, 7994, 9752, 23076, 63897, 8502, 89797, 171023, 6731, 54819, 9612, 84181, 55051, 285761, 80223, 444, 9702, 8941, 4836, 5496, 55612, 57062, 10579, 10765, 9646, 4086, 23060, 84294, 3609, 23054, 9669, 22993, 92140, 5514, 6046, 4090, 10467, 7270, 6949, 4093, 134218, 6433, 83746, 57545, 11214, 91748, 55573, 23288, 260425, 9733, 1736, 7466…	3830	99	6215	1.16377	1	0.997449	52.1854
UP_SEQ_FEATURE	compositionally biased region:Poly-Ser	146	3.61297	0.0418064	23512, 3720, 10290, 79990, 22906, 2296, 22903, 1388, 1822, 63898, 10712, 538, 2150, 220042, 63897, 171023, 126248, 51564, 30815, 55051, 4214, 55852, 3096, 23269, 5170, 8028, 4193, 81848, 4298, 79915, 9915, 4299, 540, 54823, 8867, 23060, 4779, 8030, 283450, 7799, 22993, 2077, 9774, 9776, 64419, 9778, 152485, 8443, 10734, 6949, 23522, 79834, 54875, 388969, 80205, 80851, 5150, 9371, 10743, 9762, 234…	3830	215	6215	1.10194	1	0.998793	57.1726
UP_SEQ_FEATURE	domain:Cadherin 6	13	0.321703	0.0509573	2195, 56133, 56123, 5097, 56105, 56122, 9752, 5098, 5101, 1952, 1951, 56121, 79633	3830	14	6215	1.50681	1	0.999685	64.6028
UP_SEQ_FEATURE	repeat:Kelch 4	26	0.643405	0.0642622	55709, 57542, 90293, 57563, 1954, 89890, 114818, 27252, 25948, 23276, 9903, 84541, 80311, 8139, 84861, 51088, 9920, 10625, 4289, 55295, 23588, 84078, 54813, 64410, 54800, 3054	3830	33	6215	1.2785	1	0.999956	73.2567
UP_SEQ_FEATURE	repeat:Kelch 2	26	0.643405	0.0642622	55709, 57542, 90293, 57563, 1954, 89890, 114818, 27252, 25948, 23276, 9903, 84541, 80311, 8139, 84861, 51088, 9920, 10625, 4289, 55295, 23588, 84078, 54813, 64410, 54800, 3054	3830	33	6215	1.2785	1	0.999956	73.2567
UP_SEQ_FEATURE	repeat:Kelch 3	26	0.643405	0.0642622	55709, 57542, 90293, 57563, 1954, 89890, 114818, 27252, 25948, 23276, 9903, 84541, 80311, 8139, 84861, 51088, 9920, 10625, 4289, 55295, 23588, 84078, 54813, 64410, 54800, 3054	3830	33	6215	1.2785	1	0.999956	73.2567
UP_SEQ_FEATURE	repeat:Kelch 1	26	0.643405	0.0642622	55709, 57542, 90293, 57563, 1954, 89890, 114818, 27252, 25948, 23276, 9903, 84541, 80311, 8139, 84861, 51088, 9920, 10625, 4289, 55295, 23588, 84078, 54813, 64410, 54800, 3054	3830	33	6215	1.2785	1	0.999956	73.2567
UP_SEQ_FEATURE	active site:Phosphocysteine intermediate	28	0.692898	0.065936	5784, 5783, 11072, 5781, 11221, 11099, 9829, 8073, 54434, 5802, 1843, 23371, 8776, 1849, 5797, 1847, 5775, 8897, 5728, 5796, 25930, 138639, 5792, 150290, 80824, 9110, 5786, 285193	3830	36	6215	1.26211	1	0.999959	74.1908
UP_SEQ_FEATURE	zinc finger region:C2H2-type 20	12	0.296956	0.0723587	7701, 25888, 463, 58499, 90338, 57547, 388558, 55628, 25925, 84622, 339327, 51427	3830	13	6215	1.49789	1	0.999982	77.4953
UP_SEQ_FEATURE	domain:BACK	12	0.296956	0.0723587	84541, 80311, 55709, 8139, 90293, 10625, 114781, 55295, 27252, 54800, 23276, 9903	3830	13	6215	1.49789	1	0.999982	77.4953
UP_SEQ_FEATURE	repeat:LRR 12	19	0.470181	0.0727659	55144, 23239, 10333, 26018, 56262, 55914, 23224, 55227, 9860, 23507, 8036, 26050, 1062, 9258, 84961, 84230, 84166, 80131, 23035	3830	23	6215	1.3405	1	0.999979	77.6906
UP_SEQ_FEATURE	repeat:Kelch 5	25	0.618659	0.0812642	55709, 57542, 90293, 57563, 1954, 89890, 114818, 27252, 25948, 23276, 9903, 84541, 80311, 8139, 84861, 51088, 10625, 4289, 55295, 23588, 84078, 54813, 64410, 54800, 3054	3830	32	6215	1.26775	1	0.999993	81.4183
UP_SEQ_FEATURE	domain:SET	25	0.618659	0.0812642	2145, 79723, 56981, 56980, 11108, 10322, 7799, 84193, 114826, 639, 63977, 51111, 55870, 23067, 9739, 9757, 80854, 54904, 4297, 8085, 55209, 9869, 58508, 29072, 64324	3830	32	6215	1.26775	1	0.999993	81.4183
UP_SEQ_FEATURE	domain:Sema	14	0.346449	0.0829062	10500, 7869, 23654, 5361, 10507, 10509, 5362, 5364, 6405, 54910, 80031, 4233, 55558, 23129	3830	16	6215	1.41988	1	0.999993	82.0668
UP_SEQ_FEATURE	repeat:LRR 17	9	0.222717	0.0843502	23239, 26018, 56262, 55914, 55227, 8036, 84166, 1062, 23035	3830	9	6215	1.62272	1	0.999993	82.6192
UP_SEQ_FEATURE	domain:Bromo	16	0.395942	0.0901491	6595, 65980, 51592, 2033, 55870, 6597, 54454, 27154, 9866, 23613, 8805, 11176, 1387, 9031, 2186, 7862	3830	19	6215	1.3665	1	0.999996	84.6792
UP_SEQ_FEATURE	signal peptide	385	9.52734	0.0907879	347051, 50999, 23654, 146433, 90231, 79086, 3480, 8321, 3482, 8322, 6868, 10618, 8323, 63915, 51368, 196463, 6091, 6786, 5361, 5362, 5364, 7481, 23509, 84898, 3597, 165215, 214, 314, 79827, 5352, 8763, 5351, 821, 374875, 410, 627, 6748, 143888, 6745, 165082, 412, 811, 813, 100133941, 285704, 1303, 8754, 6388, 118429, 6383, 6385, 85450, 79633, 55901, 84859, 27020, 57484, 60343, 2898, 27440, 3106, …	3830	598	6215	1.04472	1	0.999996	84.8914

## Sheet: M2_related_functions
Category	Term	Count	%	PValue	Genes	List Total	Pop Hits	Pop Total	Fold Enrichment	Bonferroni	Benjamini	FDR
BIOCARTA	h_mtorPathway:mTOR Signaling Pathway	15	0.717703	0.00155292	1982, 2280, 5728, 1981, 7248, 5164, 6009, 5515, 1975, 5170, 8661, 8672, 207, 6194, 2475	266	18	644	2.01754	0.336541	0.336541	2.01566
BIOCARTA	h_ccr3Pathway:CCR3 signaling in Eosinophils	8	0.382775	0.00984205	3984, 3265, 5894, 387, 5578, 5604, 2778, 9475	266	8	644	2.42105	0.926552	0.728986	12.1546
BIOCARTA	h_integrinPathway:Integrin Signaling Pathway	14	0.669856	0.0251934	1445, 3265, 5605, 5894, 6464, 5604, 7791, 857, 3688, 1399, 387, 7094, 5829, 87	266	20	644	1.69474	0.998813	0.894117	28.4175
BIOCARTA	h_uCalpainPathway:uCalpain and friends in Cell spread	8	0.382775	0.0287099	7430, 3688, 387, 7094, 5829, 5879, 87, 6709	266	9	644	2.15205	0.999543	0.853771	31.728
BIOCARTA	h_npcPathway:Mechanism of Protein Import into the Nucleus	9	0.430622	0.0338438	8021, 23636, 5905, 23225, 3837, 1104, 5901, 8420, 5903	266	11	644	1.98086	0.999887	0.837632	36.3078
BIOCARTA	h_bArrestin-srcPathway:Roles of 茂驴陆-arrestin-dependent Recruitment of Src Kinases in GPCR Signaling	6	0.287081	0.0457492	3265, 5605, 5894, 5604, 2778, 156	266	6	644	2.42105	0.999996	0.872605	45.8581
BIOCARTA	h_mCalpainPathway:mCalpain and friends in Cell motility	8	0.382775	0.0623154	824, 7430, 3265, 3688, 5576, 1956, 7094, 5829	266	10	644	1.93684	1	0.911663	56.9592
BIOCARTA	h_eif4Pathway:Regulation of eIF4e and p70 S6 Kinase	10	0.478469	0.0674307	1982, 5728, 1981, 5164, 5578, 5170, 8672, 207, 26986, 2475	266	14	644	1.72932	1	0.90012	59.9361
BIOCARTA	h_bArr-mapkPathway:Role of 茂驴陆-arrestins in the activation and targeting of MAP kinases	5	0.239234	0.0952984	5605, 5894, 5604, 2778, 156	266	5	644	2.42105	1	0.947015	73.0771
BIOCARTA	h_cdk5Pathway:Phosphorylation of MEK1 by cdk5/p35 down regulates the MAP kinase pathway	5	0.239234	0.0952984	3265, 8818, 5605, 5894, 5604	266	5	644	2.42105	1	0.947015	73.0771
BIOCARTA	h_cell2cellPathway:Cell to Cell Adhesion Signaling	5	0.239234	0.0952984	1445, 5829, 87, 1495, 1499	266	5	644	2.42105	1	0.947015	73.0771
COG_ONTOLOGY	Translation, ribosomal structure and biogenesis	14	0.669856	0.0848527	65990, 51010, 6141, 2935, 9933, 64118, 22984, 57727, 3035, 10767, 54973, 80755, 84245, 440275	232	32	819	1.54445	0.973629	0.973629	55.7805
GOTERM_BP_DIRECT	GO:0098609~cell-cell adhesion	81	3.8756	1.07402e-05	10890, 7706, 55082, 6164, 3875, 10399, 85377, 10397, 23650, 9414, 10298, 10652, 55379, 6520, 1627, 9101, 9798, 2010, 3190, 8971, 3054, 2801, 8407, 6455, 23647, 9351, 23367, 7408, 64787, 2802, 23164, 1982, 1983, 1981, 8350, 471, 1654, 8826, 55324, 64837, 5315, 11336, 5214, 27044, 9531, 10528, 3069, 2317, 22919, 6709, 9218, 79026, 30844, 51510, 10801, 3799, 10985, 5905, 57142, 26130, 26058, 5861, 6…	1854	162	5587	1.50674	0.0509098	0.0509098	0.0203784
GOTERM_BP_DIRECT	GO:0016032~viral process	79	3.7799	0.000155448	5434, 55746, 23511, 6464, 3875, 1104, 7791, 29855, 10399, 8672, 5685, 23557, 4928, 23468, 2192, 10616, 6830, 90480, 23373, 387, 1387, 6418, 3106, 29890, 3190, 6921, 5886, 3105, 4217, 8021, 23225, 6732, 6839, 64784, 581, 5690, 100101267, 23471, 5925, 5692, 57122, 274, 7337, 8729, 23264, 1981, 7175, 8451, 23063, 6449, 55690, 27044, 23636, 55729, 7329, 7416, 23352, 23013, 348995, 3178, 8907, 819, 10…	1854	167	5587	1.42554	0.530606	0.314877	0.294562
GOTERM_BP_DIRECT	GO:0050690~regulation of defense response to virus by virus	11	0.526316	0.000512574	161, 163, 375, 160, 8907, 567, 1175, 55690, 5879, 3105, 1173	1854	12	5587	2.76236	0.917447	0.564577	0.968178
GOTERM_BP_DIRECT	GO:0019886~antigen processing and presentation of exogenous peptide antigen via MHC class II	24	1.14833	0.0012895	6712, 22872, 29127, 26153, 9871, 3835, 1785, 1778, 821, 3831, 10540, 161, 51128, 163, 51164, 375, 1213, 160, 8907, 6396, 10121, 64837, 1175, 1173	1854	40	5587	1.80809	0.998122	0.791822	2.41876
GOTERM_BP_DIRECT	GO:0007050~cell cycle arrest	36	1.72249	0.00180366	5311, 3265, 1028, 5371, 9092, 9927, 2475, 1030, 1031, 5565, 5563, 7046, 10657, 7251, 64121, 2619, 203, 580, 6009, 5604, 133746, 324, 5925, 25, 57521, 7157, 5036, 7480, 5621, 1982, 463, 7248, 8451, 84687, 440275, 4609	1854	69	5587	1.57225	0.999847	0.827359	3.36765
GOTERM_BP_DIRECT	GO:0043065~positive regulation of apoptotic process	60	2.87081	0.00278807	7023, 9240, 50649, 9828, 10399, 84033, 23370, 3482, 10921, 8737, 3486, 1723, 572, 4217, 84289, 580, 3301, 26524, 581, 55851, 8874, 23365, 25, 8061, 207, 22985, 274, 7480, 835, 29, 3688, 7410, 9113, 1654, 23788, 5879, 7204, 6194, 23787, 9263, 1785, 9093, 27429, 57805, 1499, 1843, 51447, 9026, 10018, 6477, 84883, 11214, 133746, 324, 7316, 7157, 3329, 3939, 468, 11124	1854	131	5587	1.38022	0.999999	0.896047	5.16007
GOTERM_BP_DIRECT	GO:0006413~translational initiation	39	1.86603	0.00393573	6141, 27161, 6164, 6165, 8672, 6168, 2197, 27335, 1975, 6139, 6173, 6136, 6137, 6134, 6135, 23521, 6217, 6154, 8661, 23367, 6235, 8667, 3692, 6158, 8666, 8665, 8664, 1982, 1983, 6228, 6201, 1981, 10605, 7458, 728689, 6191, 6194, 6128, 26986	1854	79	5587	1.48767	1	0.935477	7.20995
GOTERM_BP_DIRECT	GO:0006919~activation of cysteine-type endopeptidase activity involved in apoptotic process	18	0.861244	0.00417553	9994, 27018, 6091, 581, 7415, 10399, 5371, 9093, 10541, 3329, 835, 10016, 8737, 9026, 22900, 572, 10018, 23787	1854	29	5587	1.87044	1	0.921492	7.63293
GOTERM_BP_DIRECT	GO:0010467~gene expression	16	0.76555	0.00521824	5434, 10236, 5094, 9589, 27316, 3187, 2963, 10644, 3178, 3183, 22916, 3191, 5431, 5430, 3190, 3181	1854	25	5587	1.92863	1	0.940877	9.45101
GOTERM_BP_DIRECT	GO:0006886~intracellular protein transport	48	2.29665	0.00530504	23637, 10043, 10952, 10228, 10245, 8675, 1314, 8677, 8943, 8924, 23557, 10959, 10016, 10945, 63894, 8775, 54662, 64374, 8907, 6396, 1175, 1173, 23214, 6810, 3837, 9779, 63971, 112936, 9871, 372, 30000, 5901, 3831, 79711, 22820, 161, 163, 51128, 5476, 10938, 1121, 1213, 160, 115704, 23061, 23062, 11260, 23102	1854	103	5587	1.40434	1	0.924813	9.60082
GOTERM_BP_DIRECT	GO:0006120~mitochondrial electron transport, NADH to ubiquinone	13	0.62201	0.00701016	4716, 4707, 4705, 4706, 4724, 4712, 4723, 4714, 4702, 4700, 4722, 4695, 57017	1854	19	5587	2.06186	1	0.955458	12.4965
GOTERM_BP_DIRECT	GO:0016925~protein sumoylation	34	1.62679	0.00774886	8243, 165918, 23636, 23511, 55746, 100532731, 7329, 5371, 8924, 4928, 348995, 10274, 26036, 5885, 6613, 3190, 8021, 5905, 23225, 3619, 83746, 100101267, 84901, 7508, 57122, 7157, 10210, 7158, 5903, 7175, 3183, 9112, 6015, 142	1854	69	5587	1.48491	1	0.957308	13.7235
GOTERM_BP_DIRECT	GO:0045595~regulation of cell differentiation	10	0.478469	0.00843683	9991, 10297, 3148, 5515, 5894, 5518, 150094, 324, 3992, 7020	1854	13	5587	2.31806	1	0.958026	14.8516
GOTERM_BP_DIRECT	GO:0006888~ER to Golgi vesicle-mediated transport	37	1.77033	0.00868358	10525, 54732, 22872, 1294, 7415, 340371, 1314, 57222, 6709, 22878, 10959, 10540, 10652, 10945, 90522, 9218, 8775, 58485, 10113, 6399, 2348, 64764, 2801, 5861, 6712, 6711, 10490, 372, 9871, 1778, 11021, 22820, 57120, 9183, 8729, 51128, 51164	1854	77	5587	1.44804	1	0.951719	15.2528
GOTERM_BP_DIRECT	GO:0048013~ephrin receptor signaling pathway	22	1.05263	0.00875844	3265, 1947, 5781, 2050, 1969, 55851, 8874, 28964, 1942, 161, 1398, 163, 10552, 7410, 387, 160, 71, 1175, 10109, 5879, 1173, 9475	1854	40	5587	1.65742	1	0.942339	15.3741
GOTERM_BP_DIRECT	GO:0006468~protein phosphorylation	79	3.7799	0.00927563	5128, 2580, 5891, 1198, 79705, 23235, 1147, 5164, 5894, 5578, 26750, 340371, 7297, 984, 2475, 84033, 50488, 10922, 3486, 5585, 84206, 4217, 5601, 29941, 6732, 415116, 56997, 30849, 26524, 5170, 207, 7443, 3297, 11183, 9113, 8986, 7204, 440275, 3609, 1459, 5257, 22853, 5256, 8518, 1455, 9261, 9263, 2931, 9578, 6793, 3984, 83983, 28996, 23012, 5565, 84197, 28951, 5563, 1460, 7046, 3654, 8445, 10114…	1854	188	5587	1.2663	1	0.941195	16.2081
GOTERM_BP_DIRECT	GO:0006397~mRNA processing	40	1.91388	0.00945685	55119, 54439, 26993, 8570, 22794, 10291, 79042, 8241, 57805, 5511, 6830, 3178, 3191, 104, 29890, 103, 10657, 9444, 6732, 55796, 9991, 4841, 55147, 10236, 5566, 23450, 22984, 22985, 7307, 9589, 9584, 10286, 25819, 57661, 58506, 11129, 10594, 5936, 3181, 10147	1854	85	5587	1.41811	1	0.934073	16.4984
GOTERM_BP_DIRECT	GO:0006897~endocytosis	32	1.5311	0.0101765	3265, 4041, 9266, 10043, 1455, 8678, 85377, 1785, 30011, 9902, 54453, 1808, 3949, 3636, 26130, 5861, 29763, 6455, 79874, 6272, 10079, 274, 50618, 351, 51479, 4830, 10938, 160, 10188, 23048, 4643, 29924	1854	65	5587	1.48356	1	0.936997	17.6421
GOTERM_BP_DIRECT	GO:0006446~regulation of translational initiation	17	0.813397	0.0117973	2733, 8661, 8672, 8667, 8666, 8665, 8664, 1982, 1653, 1983, 1981, 27335, 1975, 22916, 7458, 728689, 440275	1854	29	5587	1.76653	1	0.952103	20.1639
GOTERM_BP_DIRECT	GO:0043044~ATP-dependent chromatin remodeling	11	0.526316	0.015233	57680, 6599, 9219, 6598, 3183, 6597, 1108, 5928, 3066, 6601, 86	1854	16	5587	2.07177	1	0.976102	25.2695
GOTERM_BP_DIRECT	GO:0006338~chromatin remodeling	25	1.19617	0.0153146	6595, 116447, 100532735, 6599, 6598, 6829, 83444, 114803, 6597, 10856, 54108, 6830, 11176, 93973, 86, 5928, 5925, 7913, 55929, 6602, 3066, 6601, 55636, 4609, 9643	1854	49	5587	1.53749	1	0.971994	25.387
GOTERM_BP_DIRECT	GO:0007179~transforming growth factor beta receptor signaling pathway	24	1.14833	0.0176314	9958, 657, 5796, 8928, 3397, 7791, 7316, 5371, 8754, 3693, 409, 23370, 2280, 3688, 28996, 387, 8239, 2661, 6497, 56288, 7046, 5829, 4092, 142	1854	47	5587	1.5388	1	0.98043	28.6487
GOTERM_BP_DIRECT	GO:0007093~mitotic cell cycle checkpoint	9	0.430622	0.0180638	9183, 8243, 8379, 1030, 3265, 79035, 65123, 5925, 6194	1854	12	5587	2.26011	1	0.978844	29.2422
GOTERM_BP_DIRECT	GO:0007005~mitochondrion organization	19	0.909091	0.01906	84275, 2395, 5245, 2034, 858, 9093, 27429, 3980, 23277, 11315, 1981, 30968, 7019, 11331, 5442, 51142, 142, 3054, 5864	1854	35	5587	1.63589	1	0.979777	30.5921
GOTERM_BP_DIRECT	GO:0007094~mitotic spindle assembly checkpoint	7	0.334928	0.0190813	9183, 8379, 84861, 7756, 7175, 10459, 324	1854	8	5587	2.6368	1	0.976461	30.6206
GOTERM_BP_DIRECT	GO:0008361~regulation of cell size	7	0.334928	0.0190813	7430, 4478, 7410, 9368, 23108, 57521, 5879	1854	8	5587	2.6368	1	0.976461	30.6206
GOTERM_BP_DIRECT	GO:0030334~regulation of cell migration	16	0.76555	0.0203106	55920, 57142, 25930, 114803, 23654, 5361, 2316, 207, 4000, 50488, 387, 5270, 3911, 5879, 55558, 23129	1854	28	5587	1.72199	1	0.978497	32.252
GOTERM_BP_DIRECT	GO:0007018~microtubule-based movement	16	0.76555	0.0203106	29127, 26153, 63971, 3835, 1778, 3831, 161, 163, 90990, 160, 51143, 10749, 64837, 1175, 1173, 3799	1854	28	5587	1.72199	1	0.978497	32.252
GOTERM_BP_DIRECT	GO:1900034~regulation of cellular response to heat	23	1.10048	0.0203117	8021, 3305, 23636, 23225, 9531, 10049, 23511, 55746, 9261, 100101267, 57521, 57122, 57805, 3297, 2475, 5903, 4928, 7266, 7175, 348995, 1387, 7531, 10728	1854	45	5587	1.54023	1	0.975216	32.2535
GOTERM_BP_DIRECT	GO:0019083~viral transcription	32	1.5311	0.0214908	23636, 55746, 23511, 6141, 6164, 6165, 6168, 4928, 2197, 348995, 6139, 6173, 8021, 6136, 23225, 6137, 6134, 6135, 23521, 6217, 6154, 100101267, 6235, 6158, 57122, 5903, 6228, 6201, 7175, 6191, 6128, 6194	1854	68	5587	1.41811	1	0.977057	33.7841
GOTERM_BP_DIRECT	GO:1903146~regulation of mitophagy	12	0.574163	0.0229756	29801, 6721, 7307, 1459, 11128, 6720, 7416, 57602, 2931, 86, 6158, 27429	1854	19	5587	1.90325	1	0.979744	35.665
GOTERM_BP_DIRECT	GO:0034613~cellular protein localization	11	0.526316	0.0261458	64121, 27339, 967, 26524, 54806, 1495, 7157, 51566, 55435, 1499, 55161	1854	17	5587	1.9499	1	0.986382	39.5127
GOTERM_BP_DIRECT	GO:0006409~tRNA export from nucleus	14	0.669856	0.0270138	8021, 23636, 23225, 65083, 55746, 23511, 100101267, 57122, 5901, 5903, 4928, 7175, 348995, 11260	1854	24	5587	1.75787	1	0.986401	40.5276
GOTERM_BP_DIRECT	GO:0016477~cell migration	38	1.81818	0.0286371	967, 9344, 64759, 7297, 9578, 30011, 3728, 10298, 81565, 2195, 10297, 387, 1289, 1445, 5728, 5796, 5861, 129787, 1464, 1969, 5792, 221927, 324, 5170, 25, 8754, 27, 1942, 5291, 3688, 399687, 7410, 23286, 3915, 84687, 55704, 10188, 3911	1854	85	5587	1.3472	1	0.987933	42.3824
GOTERM_BP_DIRECT	GO:0051289~protein homotetramerization	16	0.76555	0.0294319	2801, 6648, 226, 64784, 55856, 6256, 7408, 79077, 5211, 3615, 7915, 54974, 23373, 5471, 6472, 81502	1854	29	5587	1.66261	1	0.987773	43.2705
GOTERM_BP_DIRECT	GO:0061621~canonical glycolysis	10	0.478469	0.029657	3098, 7167, 5209, 226, 2597, 5315, 5214, 5213, 2821, 5211	1854	15	5587	2.00899	1	0.986536	43.5197
GOTERM_BP_DIRECT	GO:0060071~Wnt signaling pathway, planar cell polarity pathway	24	1.14833	0.0306664	64750, 1857, 5708, 10213, 5690, 5705, 5710, 1952, 7316, 5692, 1855, 5685, 5687, 409, 161, 163, 387, 1213, 10197, 160, 128272, 1175, 5879, 1173	1854	49	5587	1.47599	1	0.986824	44.6242
GOTERM_BP_DIRECT	GO:0008380~RNA splicing	40	1.91388	0.0326825	55119, 26993, 8570, 8241, 57805, 5511, 6830, 25804, 5515, 10921, 5518, 9128, 29890, 8996, 9444, 64121, 8233, 55796, 6628, 6732, 9991, 4841, 8563, 79228, 23450, 22985, 7307, 9589, 9584, 10286, 3183, 10625, 22916, 58506, 11129, 84687, 10594, 5936, 10147, 7919	1854	91	5587	1.32461	1	0.988785	46.7693
GOTERM_BP_DIRECT	GO:0043984~histone H4-K16 acetylation	9	0.430622	0.033467	9767, 284058, 23338, 51230, 84148, 10445, 4297, 3054, 11091	1854	13	5587	2.08626	1	0.988619	47.5826
GOTERM_BP_DIRECT	GO:0050999~regulation of nitric-oxide synthase activity	9	0.430622	0.033467	51070, 6697, 1956, 808, 1785, 857, 5805, 207, 23564	1854	13	5587	2.08626	1	0.988619	47.5826
GOTERM_BP_DIRECT	GO:0007077~mitotic nuclear envelope disassembly	15	0.717703	0.0340967	8021, 23636, 23225, 55746, 23511, 5578, 100101267, 57122, 4000, 7443, 5903, 4928, 7175, 348995, 2010	1854	27	5587	1.67416	1	0.988221	48.2268
GOTERM_BP_DIRECT	GO:0001525~angiogenesis	35	1.67464	0.0342003	688, 2050, 5578, 6464, 2034, 57674, 3339, 7453, 14, 10016, 7423, 80781, 5728, 1284, 1464, 3397, 3091, 8751, 113026, 857, 10908, 23509, 1942, 7410, 10553, 7342, 51129, 8829, 116150, 4627, 29072, 3911, 4691, 23129, 2821	1854	78	5587	1.3522	1	0.986976	48.3321
GOTERM_BP_DIRECT	GO:0070534~protein K63-linked ubiquitination	12	0.574163	0.0360335	165918, 11060, 80829, 27339, 55658, 10477, 27338, 7335, 63893, 10273, 7326, 10425	1854	20	5587	1.80809	1	0.988478	50.1617
GOTERM_BP_DIRECT	GO:0007611~learning or memory	8	0.382775	0.0374464	5728, 84197, 1956, 80823, 2760, 267, 2821, 5621	1854	11	5587	2.19162	1	0.989205	51.5297
GOTERM_BP_DIRECT	GO:0043982~histone H4-K8 acetylation	8	0.382775	0.0374464	9767, 284058, 23338, 51230, 84148, 10445, 3054, 11091	1854	11	5587	2.19162	1	0.989205	51.5297
GOTERM_BP_DIRECT	GO:0006816~calcium ion transport	8	0.382775	0.0374464	5311, 6717, 6520, 7178, 27032, 857, 309, 51669	1854	11	5587	2.19162	1	0.989205	51.5297
GOTERM_BP_DIRECT	GO:0006337~nucleosome disassembly	8	0.382775	0.0374464	11198, 6599, 6598, 6597, 6418, 6602, 6601, 3159	1854	11	5587	2.19162	1	0.989205	51.5297
GOTERM_BP_DIRECT	GO:0043981~histone H4-K5 acetylation	8	0.382775	0.0374464	9767, 284058, 23338, 51230, 84148, 10445, 3054, 11091	1854	11	5587	2.19162	1	0.989205	51.5297
GOTERM_BP_DIRECT	GO:0016575~histone deacetylation	14	0.669856	0.0395563	5928, 1108, 138151, 5245, 1107, 10362, 11176, 51317, 9219, 9112, 23028, 3066, 9643, 5931	1854	25	5587	1.68755	1	0.990675	53.5066
GOTERM_BP_DIRECT	GO:0043433~negative regulation of sequence-specific DNA binding transcription factor activity	16	0.76555	0.0412348	11060, 59307, 54583, 3397, 2316, 3398, 9817, 5925, 7466, 5621, 10459, 23028, 3066, 11331, 4092, 51132	1854	30	5587	1.60719	1	0.99147	55.0244
GOTERM_BP_DIRECT	GO:0005980~glycogen catabolic process	7	0.334928	0.0412779	5257, 5834, 5256, 1373, 808, 55276, 5213	1854	9	5587	2.34382	1	0.990542	55.0628
GOTERM_BP_DIRECT	GO:0048041~focal adhesion assembly	7	0.334928	0.0412779	55920, 5796, 8874, 9344, 5170, 3911, 87	1854	9	5587	2.34382	1	0.990542	55.0628
GOTERM_BP_DIRECT	GO:0097193~intrinsic apoptotic signaling pathway	11	0.526316	0.0416625	9647, 3265, 28996, 1654, 581, 8451, 81537, 572, 9092, 8996, 7157	1854	18	5587	1.84157	1	0.989955	55.4036
GOTERM_BP_DIRECT	GO:0016569~covalent chromatin modification	30	1.43541	0.0431453	7290, 6599, 3720, 6598, 6597, 100532731, 23378, 1106, 9555, 29855, 1786, 114049, 10927, 6046, 6944, 54971, 26147, 9611, 83746, 2908, 64061, 5925, 63035, 23492, 57680, 7913, 6602, 6601, 55636, 7917	1854	66	5587	1.36977	1	0.990576	56.6949
GOTERM_BP_DIRECT	GO:0021772~olfactory bulb development	6	0.287081	0.0442102	1808, 2131, 3398, 6497, 23322, 55636	1854	7	5587	2.58299	1	0.990725	57.6004
GOTERM_BP_DIRECT	GO:0006164~purine nucleotide biosynthetic process	6	0.287081	0.0442102	5631, 5471, 471, 5198, 158, 3615	1854	7	5587	2.58299	1	0.990725	57.6004
GOTERM_BP_DIRECT	GO:0032786~positive regulation of DNA-templated transcription, elongation	6	0.287081	0.0442102	11198, 8563, 6829, 7919, 3150, 8178	1854	7	5587	2.58299	1	0.990725	57.6004
GOTERM_BP_DIRECT	GO:0035774~positive regulation of insulin secretion involved in cellular response to glucose stimulus	5	0.239234	0.0443746	6717, 6810, 3091, 572, 3799	1854	5	5587	3.01348	1	0.989952	57.7386
GOTERM_BP_DIRECT	GO:0045861~negative regulation of proteolysis	5	0.239234	0.0443746	1476, 5270, 1471, 207, 7917	1854	5	5587	3.01348	1	0.989952	57.7386
GOTERM_BP_DIRECT	GO:0007084~mitotic nuclear envelope reassembly	5	0.239234	0.0443746	5515, 5518, 2010, 7443, 4000	1854	5	5587	3.01348	1	0.989952	57.7386
GOTERM_BP_DIRECT	GO:1903827~regulation of cellular protein localization	5	0.239234	0.0443746	1857, 10228, 23028, 1855, 142	1854	5	5587	3.01348	1	0.989952	57.7386
GOTERM_BP_DIRECT	GO:0006207~'de novo' pyrimidine nucleobase biosynthetic process	5	0.239234	0.0443746	790, 1373, 51727, 1723, 2475	1854	5	5587	3.01348	1	0.989952	57.7386
GOTERM_BP_DIRECT	GO:0007160~cell-matrix adhesion	13	0.62201	0.0459638	967, 8751, 7791, 8754, 3693, 1499, 3675, 3688, 7248, 8500, 10018, 5829, 5879	1854	23	5587	1.70327	1	0.990644	59.0525
GOTERM_BP_DIRECT	GO:0010951~negative regulation of endopeptidase activity	13	0.62201	0.0459638	7035, 1476, 1294, 9097, 5345, 51232, 207, 334, 351, 5270, 7077, 57448, 7076	1854	23	5587	1.70327	1	0.990644	59.0525
GOTERM_BP_DIRECT	GO:0000184~nuclear-transcribed mRNA catabolic process, nonsense-mediated decay	31	1.48325	0.0464209	6141, 2935, 22794, 6164, 6165, 6168, 2197, 5515, 10921, 5518, 56006, 6139, 6173, 6136, 6137, 6134, 6135, 23521, 6217, 6154, 6235, 6158, 6228, 6201, 1981, 22916, 6191, 6128, 23381, 6194, 26986	1854	69	5587	1.35388	1	0.990196	59.4231
GOTERM_BP_DIRECT	GO:0044267~cellular protein metabolic process	15	0.717703	0.0478828	29080, 26058, 8350, 3486, 8239, 8364, 3339, 567, 7316, 1471, 6477, 8367, 23062, 728294, 351	1854	28	5587	1.61437	1	0.990727	60.5874
GOTERM_BP_DIRECT	GO:0001731~formation of translation preinitiation complex	10	0.478469	0.0482022	1983, 27335, 1975, 7458, 8661, 728689, 8667, 8666, 8665, 8664	1854	16	5587	1.88343	1	0.990167	60.8376
GOTERM_BP_DIRECT	GO:0090004~positive regulation of establishment of protein localization to plasma membrane	10	0.478469	0.0482022	7430, 6810, 3688, 3675, 1969, 84687, 5170, 11079, 207, 3799	1854	16	5587	1.88343	1	0.990167	60.8376
GOTERM_BP_DIRECT	GO:0006357~regulation of transcription from RNA polymerase II promoter	79	3.7799	0.050376	6595, 7290, 988, 6599, 100507290, 3148, 6598, 6829, 6597, 1108, 1106, 1107, 5993, 26122, 29855, 10194, 9282, 221937, 1523, 5989, 54859, 27336, 5885, 3190, 5585, 6921, 86, 6924, 3150, 9442, 22887, 6648, 6837, 6294, 6689, 8625, 5925, 8061, 7342, 7073, 1655, 6602, 23028, 58190, 6601, 4791, 6778, 374655, 64710, 3607, 865, 8518, 26205, 2355, 55257, 20, 6046, 10902, 51586, 9935, 112950, 10847, 133746, …	1854	201	5587	1.1844	1	0.991302	62.5004
GOTERM_BP_DIRECT	GO:0051592~response to calcium ion	12	0.574163	0.0535083	1843, 10016, 22872, 3710, 1956, 808, 572, 857, 8754, 310, 360, 728294	1854	21	5587	1.72199	1	0.992948	64.7792
GOTERM_BP_DIRECT	GO:0006614~SRP-dependent cotranslational protein targeting to membrane	25	1.19617	0.0544597	6173, 6136, 6137, 6134, 6135, 6141, 23521, 6726, 58477, 6217, 6164, 6154, 6165, 6235, 6168, 6158, 6228, 6201, 2197, 6191, 6139, 29927, 6194, 6731, 6128	1854	54	5587	1.39513	1	0.99294	65.445
GOTERM_BP_DIRECT	GO:0051260~protein homooligomerization	28	1.33971	0.0557556	210, 1374, 138151, 57674, 7415, 1861, 27316, 8799, 114897, 8737, 79047, 30844, 53834, 51133, 6648, 3710, 581, 27243, 857, 309, 3297, 5621, 10211, 57120, 79139, 10938, 51129, 219743	1854	62	5587	1.36093	1	0.993154	66.3327
GOTERM_BP_DIRECT	GO:0031623~receptor internalization	9	0.430622	0.0557939	409, 26119, 7430, 3688, 1213, 1785, 857, 156, 11031	1854	14	5587	1.93724	1	0.992554	66.3586
GOTERM_BP_DIRECT	GO:0072583~clathrin-mediated endocytosis	9	0.430622	0.0557939	161, 2580, 163, 160, 9026, 23396, 1175, 821, 1173	1854	14	5587	1.93724	1	0.992554	66.3586
GOTERM_BP_DIRECT	GO:0042493~response to drug	45	2.15311	0.0581058	210, 1147, 1374, 3148, 2356, 1373, 4705, 5021, 8678, 6185, 1499, 1808, 20, 3675, 8836, 3030, 7423, 1723, 572, 80781, 6731, 1857, 5728, 6648, 4363, 5198, 476, 2778, 25, 10512, 7508, 8061, 3329, 23492, 5395, 3939, 5498, 7077, 6720, 3066, 567, 1471, 6652, 4609, 11044	1854	108	5587	1.25562	1	0.993403	67.8878
GOTERM_BP_DIRECT	GO:0007411~axon guidance	26	1.24402	0.058954	3265, 2131, 10678, 7869, 3897, 55740, 6709, 1808, 10381, 6477, 3799, 1947, 6712, 6091, 26153, 6711, 7408, 10512, 1855, 1942, 7430, 3913, 8829, 4628, 5879, 5818	1854	57	5587	1.37457	1	0.993332	68.4321
GOTERM_BP_DIRECT	GO:0030968~endoplasmic reticulum unfolded protein response	11	0.526316	0.0624258	80279, 64764, 79139, 27230, 10273, 55298, 7415, 7466, 16, 267, 51009	1854	19	5587	1.74465	1	0.994628	70.5702
GOTERM_BP_DIRECT	GO:0034446~substrate adhesion-dependent cell spreading	11	0.526316	0.0624258	5861, 3915, 55742, 3911, 25, 79778, 3912, 53834, 5879, 23380, 1942	1854	19	5587	1.74465	1	0.994628	70.5702
GOTERM_BP_DIRECT	GO:0035023~regulation of Rho protein signal transduction	17	0.813397	0.0639722	5894, 50649, 8874, 11214, 23365, 9828, 64787, 50618, 29, 10211, 84033, 23370, 7410, 9138, 128272, 55701, 7204	1854	34	5587	1.50674	1	0.994869	71.4778
GOTERM_BP_DIRECT	GO:0097352~autophagosome maturation	8	0.382775	0.0645821	63894, 9342, 10490, 7415, 128077, 7251, 26100, 23557	1854	12	5587	2.00899	1	0.994693	71.8284
GOTERM_BP_DIRECT	GO:0000060~protein import into nucleus, translocation	8	0.382775	0.0645821	55696, 3837, 10952, 30000, 11331, 207, 5901, 79711	1854	12	5587	2.00899	1	0.994693	71.8284
GOTERM_BP_DIRECT	GO:0003091~renal water homeostasis	8	0.382775	0.0645821	112, 109, 113, 5576, 5566, 7466, 2778, 360	1854	12	5587	2.00899	1	0.994693	71.8284
GOTERM_BP_DIRECT	GO:0043086~negative regulation of catalytic activity	15	0.717703	0.0651037	22853, 10236, 51686, 308, 57805, 5511, 51070, 1728, 23197, 5504, 6418, 84687, 7076, 10776, 55832	1854	29	5587	1.5587	1	0.994476	72.125
GOTERM_BP_DIRECT	GO:0030308~negative regulation of cell growth	25	1.19617	0.0671656	6595, 6597, 10399, 5371, 57805, 221937, 1031, 51447, 5515, 5518, 6494, 57142, 5795, 5245, 64061, 8751, 51094, 7157, 3373, 4722, 1654, 5270, 84687, 2661, 5931	1854	55	5587	1.36977	1	0.994934	73.2688
GOTERM_BP_DIRECT	GO:0048025~negative regulation of mRNA splicing, via spliceosome	10	0.478469	0.0730157	27316, 6433, 6434, 79171, 10921, 3190, 3181, 22985, 8241, 10772	1854	17	5587	1.77264	1	0.996568	76.2768
GOTERM_BP_DIRECT	GO:0006754~ATP biosynthetic process	7	0.334928	0.0746833	522, 2631, 10476, 226, 10632, 5315, 516	1854	10	5587	2.10944	1	0.996725	77.0736
GOTERM_BP_DIRECT	GO:0000027~ribosomal large subunit assembly	7	0.334928	0.0746833	6136, 692312, 56342, 6134, 6135, 55052, 6128	1854	10	5587	2.10944	1	0.996725	77.0736
GOTERM_BP_DIRECT	GO:0006335~DNA replication-dependent nucleosome assembly	7	0.334928	0.0746833	10036, 8350, 5928, 8364, 4678, 8367, 79711	1854	10	5587	2.10944	1	0.996725	77.0736
GOTERM_BP_DIRECT	GO:0032570~response to progesterone	7	0.334928	0.0746833	5021, 6720, 572, 857, 8061, 11057, 2821	1854	10	5587	2.10944	1	0.996725	77.0736
GOTERM_BP_DIRECT	GO:0030970~retrograde protein transport, ER to cytosol	7	0.334928	0.0746833	79139, 23197, 92305, 10952, 7415, 55666, 51009	1854	10	5587	2.10944	1	0.996725	77.0736
GOTERM_BP_DIRECT	GO:0001649~osteoblast differentiation	21	1.00478	0.0750474	7290, 23020, 27044, 2091, 865, 1969, 5245, 3371, 207, 9902, 23560, 6238, 27316, 3491, 3183, 55366, 1213, 3486, 57003, 9188, 103	1854	45	5587	1.40629	1	0.996534	77.2442
GOTERM_BP_DIRECT	GO:0042059~negative regulation of epidermal growth factor receptor signaling pathway	14	0.669856	0.0757548	23636, 5795, 1956, 8874, 7316, 30011, 161, 163, 55658, 160, 1175, 1173, 29924, 7251	1854	27	5587	1.56255	1	0.996433	77.5722
GOTERM_BP_DIRECT	GO:0032508~DNA duplex unwinding	14	0.669856	0.0757548	4172, 4174, 1108, 10856, 1106, 1107, 9401, 1653, 57680, 1654, 84893, 2547, 10146, 23064	1854	27	5587	1.56255	1	0.996433	77.5722
GOTERM_BP_DIRECT	GO:0006006~glucose metabolic process	14	0.669856	0.0757548	8402, 1374, 5164, 5160, 27230, 221927, 55276, 207, 7915, 11188, 2597, 3636, 6652, 4609	1854	27	5587	1.56255	1	0.996433	77.5722
GOTERM_BP_DIRECT	GO:0071364~cellular response to epidermal growth factor stimulus	12	0.574163	0.0758287	790, 7538, 5782, 8826, 1956, 3397, 84687, 5170, 8678, 1915, 207, 4609	1854	22	5587	1.64372	1	0.996151	77.6062
GOTERM_BP_DIRECT	GO:0008203~cholesterol metabolic process	12	0.574163	0.0758287	6721, 26119, 3949, 4041, 114879, 10613, 6713, 3069, 6720, 6256, 22937, 351	1854	22	5587	1.64372	1	0.996151	77.6062
GOTERM_BP_DIRECT	GO:0007420~brain development	34	1.62679	0.0783898	9531, 5781, 2356, 23054, 23654, 84100, 2475, 1808, 8775, 5209, 84197, 56006, 23133, 10018, 10063, 80279, 1445, 1282, 4724, 166378, 3397, 55755, 835, 7337, 29, 409, 463, 57680, 9114, 5049, 2547, 1471, 2181, 7917	1854	80	5587	1.28073	1	0.996564	78.7549
GOTERM_BP_DIRECT	GO:1901796~regulation of signal transduction by p53 class mediator	28	1.33971	0.0812825	1459, 1108, 1107, 5371, 22974, 11198, 387893, 28996, 5565, 9219, 5563, 54971, 1460, 83695, 8445, 9891, 84289, 26155, 580, 5928, 133746, 7316, 51230, 207, 7157, 3066, 7862, 5931	1854	64	5587	1.3184	1	0.997	79.9852
GOTERM_BP_DIRECT	GO:0006898~receptor-mediated endocytosis	17	0.813397	0.082716	10525, 2580, 2348, 10244, 1956, 1785, 85377, 200576, 949, 143458, 3949, 26119, 3482, 1213, 9026, 84547, 4074	1854	35	5587	1.46369	1	0.997073	80.5696
GOTERM_BP_DIRECT	GO:0031100~organ regeneration	9	0.430622	0.0856645	790, 5631, 3482, 2356, 5471, 4288, 471, 5634, 5315	1854	15	5587	1.80809	1	0.997442	81.7211
GOTERM_BP_DIRECT	GO:0033962~cytoplasmic mRNA processing body assembly	6	0.287081	0.0860916	25804, 25819, 26065, 6311, 29883, 1778	1854	8	5587	2.26011	1	0.997311	81.8825
GOTERM_BP_DIRECT	GO:0006123~mitochondrial electron transport, cytochrome c to oxygen	6	0.287081	0.0860916	1352, 9377, 1340, 1349, 1327, 1345	1854	8	5587	2.26011	1	0.997311	81.8825
GOTERM_BP_DIRECT	GO:0009168~purine ribonucleoside monophosphate biosynthetic process	6	0.287081	0.0860916	5471, 471, 10606, 5198, 158, 3615	1854	8	5587	2.26011	1	0.997311	81.8825
GOTERM_BP_DIRECT	GO:0006261~DNA-dependent DNA replication	6	0.287081	0.0860916	5428, 8099, 5425, 7019, 5981, 79892	1854	8	5587	2.26011	1	0.997311	81.8825
GOTERM_BP_DIRECT	GO:1990138~neuron projection extension	6	0.287081	0.0860916	81565, 8826, 5361, 23028, 440275, 55558	1854	8	5587	2.26011	1	0.997311	81.8825
GOTERM_BP_DIRECT	GO:0046777~protein autophosphorylation	26	1.24402	0.0868888	1198, 23235, 22853, 2050, 1455, 1956, 9261, 6793, 2475, 50488, 8737, 84206, 3654, 1445, 415116, 5566, 5170, 25, 207, 2261, 7443, 65125, 790, 27102, 150094, 440275	1854	59	5587	1.32798	1	0.99725	82.18
GOTERM_BP_DIRECT	GO:0042127~regulation of cell proliferation	26	1.24402	0.0868888	5311, 7297, 1786, 10397, 3728, 10899, 7165, 9891, 1445, 3371, 113026, 25, 1874, 27, 10210, 1717, 5813, 55658, 84687, 55704, 57448, 3911, 10188, 6778, 7917, 50809	1854	59	5587	1.32798	1	0.99725	82.18
GOTERM_BP_DIRECT	GO:0008360~regulation of cell shape	26	1.24402	0.0868888	9948, 6284, 5064, 9368, 1455, 9344, 55742, 23654, 10507, 310, 30011, 23370, 1729, 23191, 103910, 55023, 114299, 226, 116985, 7443, 4478, 7430, 54014, 445815, 4627, 4628	1854	59	5587	1.32798	1	0.99725	82.18
GOTERM_BP_DIRECT	GO:0006325~chromatin organization	11	0.526316	0.088818	58499, 64710, 55746, 3148, 1108, 6839, 6294, 1107, 81887, 80854, 3150	1854	20	5587	1.65742	1	0.997405	82.881
GOTERM_BP_DIRECT	GO:0061025~membrane fusion	11	0.526316	0.088818	6810, 55968, 9218, 8775, 9342, 10490, 8675, 6844, 1785, 8677, 310	1854	20	5587	1.65742	1	0.997405	82.881
GOTERM_BP_DIRECT	GO:0008104~protein localization	11	0.526316	0.088818	9696, 445815, 51596, 26153, 9798, 11190, 8985, 857, 11021, 7157, 11325	1854	20	5587	1.65742	1	0.997405	82.881
GOTERM_BP_DIRECT	GO:0043525~positive regulation of neuron apoptotic process	11	0.526316	0.088818	997, 4835, 1728, 468, 581, 25, 10018, 7157, 1499, 7020, 835	1854	20	5587	1.65742	1	0.997405	82.881
GOTERM_BP_DIRECT	GO:0018107~peptidyl-threonine phosphorylation	11	0.526316	0.088818	790, 28996, 22853, 5566, 5170, 7046, 10114, 156, 207, 2475, 65125	1854	20	5587	1.65742	1	0.997405	82.881
GOTERM_BP_DIRECT	GO:0045814~negative regulation of gene expression, epigenetic	11	0.526316	0.088818	8726, 3720, 8350, 5928, 100532731, 8364, 9555, 26147, 1786, 8367, 5931	1854	20	5587	1.65742	1	0.997405	82.881
GOTERM_BP_DIRECT	GO:0030155~regulation of cell adhesion	11	0.526316	0.088818	9891, 5795, 5515, 5518, 3911, 5371, 25, 8502, 11124, 27, 9475	1854	20	5587	1.65742	1	0.997405	82.881
GOTERM_BP_DIRECT	GO:0048208~COPII vesicle coating	16	0.76555	0.0956178	2348, 9919, 5861, 2801, 22872, 1294, 22870, 9871, 10959, 51128, 55291, 8775, 6396, 58485, 10113, 6399	1854	33	5587	1.46108	1	0.998253	85.1493
GOTERM_BP_DIRECT	GO:0044387~negative regulation of protein kinase activity by regulation of protein phosphorylation	5	0.239234	0.0983781	80279, 9647, 104, 103, 23603	1854	6	5587	2.51124	1	0.998434	85.9862
GOTERM_BP_DIRECT	GO:0006189~'de novo' IMP biosynthetic process	5	0.239234	0.0983781	5471, 471, 10606, 5198, 158	1854	6	5587	2.51124	1	0.998434	85.9862
GOTERM_BP_DIRECT	GO:0048255~mRNA stabilization	5	0.239234	0.0983781	25819, 10605, 1153, 26986, 2475	1854	6	5587	2.51124	1	0.998434	85.9862
GOTERM_BP_DIRECT	GO:0045332~phospholipid translocation	5	0.239234	0.0983781	23200, 55754, 57205, 10079, 23250	1854	6	5587	2.51124	1	0.998434	85.9862
GOTERM_BP_DIRECT	GO:0015986~ATP synthesis coupled proton transport	5	0.239234	0.0983781	522, 10476, 10632, 9605, 516	1854	6	5587	2.51124	1	0.998434	85.9862
GOTERM_BP_DIRECT	GO:0034199~activation of protein kinase A activity	5	0.239234	0.0983781	112, 109, 113, 5576, 5566	1854	6	5587	2.51124	1	0.998434	85.9862
GOTERM_BP_DIRECT	GO:0034333~adherens junction assembly	5	0.239234	0.0983781	23396, 6904, 3728, 4092, 1499	1854	6	5587	2.51124	1	0.998434	85.9862
GOTERM_BP_DIRECT	GO:0030111~regulation of Wnt signaling pathway	5	0.239234	0.0983781	30851, 3675, 5515, 5518, 8724	1854	6	5587	2.51124	1	0.998434	85.9862
GOTERM_BP_DIRECT	GO:0010793~regulation of mRNA export from nucleus	5	0.239234	0.0983781	6830, 23144, 7175, 26993, 29072	1854	6	5587	2.51124	1	0.998434	85.9862
GOTERM_BP_DIRECT	GO:0032211~negative regulation of telomere maintenance via telomerase	5	0.239234	0.0983781	54552, 3178, 3183, 55226, 5371	1854	6	5587	2.51124	1	0.998434	85.9862
GOTERM_BP_DIRECT	GO:0006396~RNA processing	25	1.19617	0.0983871	9987, 10291, 8761, 8106, 10521, 11100, 10523, 25804, 9128, 23405, 3191, 104, 103, 3190, 6433, 56919, 22907, 3187, 9584, 5937, 5936, 10147, 23064, 5935, 79039	1854	57	5587	1.3217	1	0.998302	85.9889
GOTERM_CC_DIRECT	GO:0016020~membrane	434	20.7656	2.0539e-14	10999, 23511, 1314, 10899, 156, 90231, 334, 55379, 3482, 6867, 2010, 6494, 55226, 8733, 1327, 79711, 23509, 1717, 8729, 163, 738, 160, 5214, 23788, 23787, 219743, 1819, 55920, 5355, 57222, 310, 821, 2975, 8239, 51293, 819, 254531, 23521, 58477, 226, 5245, 221927, 10075, 6388, 6389, 10606, 6484, 2821, 988, 27161, 112, 3241, 59307, 6597, 10952, 10856, 200734, 91289, 8364, 3106, 10061, 8367, 2997, 1…	1944	996	5890	1.32023	1.88138e-11	1.88138e-11	3.20854e-11
GOTERM_CC_DIRECT	GO:0070062~extracellular exosome	430	20.5742	2.12565e-12	55233, 10890, 29127, 23654, 5373, 1314, 25796, 949, 334, 1728, 3482, 3486, 2202, 203, 204, 8407, 5361, 23646, 1327, 50618, 8724, 80823, 402, 5214, 7203, 23788, 10728, 80727, 824, 210, 1431, 5355, 7326, 310, 821, 6888, 7335, 51293, 6472, 149951, 1445, 112483, 327, 58478, 226, 5245, 7317, 8751, 5345, 7316, 129804, 8754, 5339, 10075, 908, 10606, 7322, 203068, 808, 6484, 2821, 29952, 84817, 3241, 108…	1944	1009	5890	1.29121	1.94708e-09	9.7354e-10	3.32088e-09
GOTERM_CC_DIRECT	GO:0005913~cell-cell adherens junction	100	4.78469	5.08083e-08	10890, 5021, 55742, 6164, 3875, 23650, 3728, 10298, 55379, 1627, 2010, 8407, 23647, 9351, 7408, 1982, 1983, 3688, 1981, 471, 5214, 11336, 1495, 10528, 2316, 2317, 22919, 9218, 79026, 51510, 4092, 10801, 3799, 9231, 57142, 26130, 26058, 226, 324, 10211, 5339, 7430, 1399, 3939, 10938, 4627, 10606, 7534, 29766, 7531, 5818, 56904, 7706, 55082, 10399, 7791, 85377, 10397, 9414, 10652, 6520, 9101, 9798,…	1944	192	5890	1.57804	4.65393e-05	1.55134e-05	7.93777e-05
GOTERM_CC_DIRECT	GO:0005829~cytosol	577	27.6077	9.78994e-08	55233, 10892, 29127, 3476, 5373, 340371, 1314, 51371, 158, 5371, 25796, 156, 10616, 1728, 1729, 8737, 6494, 8021, 203, 55223, 23647, 8874, 207, 3297, 7337, 161, 409, 8729, 163, 51164, 738, 8724, 160, 6778, 402, 5214, 7203, 10728, 7204, 824, 55920, 8243, 23637, 210, 51292, 5257, 5256, 7329, 22919, 25778, 310, 6888, 22921, 7335, 8239, 58485, 6477, 84883, 1445, 327, 58478, 23521, 226, 324, 7317, 731…	1944	1495	5890	1.16937	8.96718e-05	2.24187e-05	0.000152948
GOTERM_CC_DIRECT	GO:0005925~focal adhesion	102	4.88038	2.69048e-07	10890, 9240, 55742, 3339, 8675, 6168, 3728, 55740, 10298, 3675, 3482, 54914, 8021, 29780, 8874, 6217, 9351, 5170, 7408, 3693, 3688, 10146, 1495, 26986, 824, 10525, 2316, 2317, 1785, 3897, 9902, 23191, 79026, 23396, 5829, 23521, 1464, 3835, 129804, 8754, 10211, 5339, 7431, 7430, 6201, 4627, 5576, 7534, 83543, 7531, 2580, 5782, 7791, 6522, 2195, 387, 8500, 81, 3190, 87, 6645, 5605, 23224, 5604, 308…	1944	202	5890	1.52992	0.000246417	4.92884e-05	0.000420332
GOTERM_CC_DIRECT	GO:0043234~protein complex	101	4.83254	4.18929e-07	7290, 2647, 10998, 9647, 3148, 10892, 1108, 282991, 8678, 5634, 488, 64398, 7402, 10613, 6418, 6497, 6494, 8874, 476, 207, 79711, 3297, 6601, 11331, 4609, 1785, 821, 9219, 7335, 6944, 4092, 9810, 4809, 5428, 3329, 790, 493, 57680, 7322, 4627, 23180, 23286, 203068, 83543, 7919, 165918, 6599, 5781, 6598, 6597, 11190, 22937, 23557, 8364, 81, 5585, 86, 8367, 80279, 29888, 6645, 223082, 3619, 10963, 5…	1944	201	5890	1.52245	0.000383666	6.39545e-05	0.00065449
GOTERM_CC_DIRECT	GO:0005654~nucleoplasm	545	26.0766	3.51277e-06	29123, 2005, 29127, 57205, 51371, 5371, 23650, 1822, 22900, 1723, 6497, 11091, 8021, 84289, 79714, 55226, 63935, 57215, 207, 3297, 29903, 7342, 8726, 10625, 7343, 6778, 10728, 1819, 5253, 8243, 51493, 8242, 7227, 219, 7329, 8106, 8241, 2975, 387893, 2976, 8445, 23524, 5245, 324, 7316, 80854, 10743, 10075, 2963, 55929, 10607, 7322, 22916, 808, 2821, 2000, 6595, 55902, 988, 6599, 27161, 6598, 6597,…	1944	1435	5890	1.1507	0.00321253	0.000459567	0.00548786
GOTERM_CC_DIRECT	GO:0048471~perinuclear region of cytoplasm	118	5.64593	0.000258545	9647, 3148, 22872, 10892, 83871, 3875, 8675, 8677, 488, 3675, 10297, 3482, 1822, 7165, 7164, 6418, 7163, 6494, 55755, 9871, 200576, 25, 3688, 26259, 4830, 3916, 3912, 6284, 22853, 9368, 10228, 22794, 2316, 7415, 1785, 10523, 92140, 9218, 23191, 2597, 9026, 1267, 10801, 3799, 4172, 6810, 10490, 2778, 6272, 10079, 8666, 25814, 7430, 10128, 25819, 23108, 10938, 23286, 4771, 1471, 64423, 11124, 2181,…	1944	272	5890	1.31441	0.210897	0.0291733	0.403162
GOTERM_CC_DIRECT	GO:0005737~cytoplasm	786	37.6077	0.000303589	55234, 3476, 5373, 340371, 5371, 949, 23650, 3482, 6867, 1822, 8737, 22900, 6497, 166614, 8409, 55223, 23647, 6091, 5361, 3297, 50618, 7337, 29903, 7342, 8724, 10728, 1819, 8243, 23636, 51493, 51292, 8030, 7326, 8761, 22919, 7329, 25778, 7328, 1843, 6888, 7335, 8239, 147968, 6472, 8445, 6477, 84883, 1445, 327, 196483, 221927, 22907, 324, 7317, 7316, 7319, 10075, 5339, 22911, 1831, 908, 55929, 229…	1944	2196	5890	1.08445	0.242802	0.0304307	0.473246
GOTERM_CC_DIRECT	GO:0031012~extracellular matrix	51	2.44019	0.000517102	1294, 3339, 6165, 3728, 4000, 2192, 8364, 1289, 80781, 3190, 2202, 8367, 4218, 1282, 1284, 6217, 3491, 3913, 3915, 5270, 1655, 7077, 3911, 71, 7078, 5315, 3912, 6191, 5214, 5879, 9804, 2316, 2317, 821, 3030, 2597, 4054, 6136, 6135, 3371, 1778, 5901, 3329, 5339, 7431, 6201, 2280, 908, 4627, 1213, 203068	1944	102	5890	1.51492	0.377361	0.0462739	0.80482
GOTERM_CC_DIRECT	GO:0005634~nucleus	799	38.2297	0.00076502	55234, 5371, 334, 221937, 7355, 6867, 1822, 25792, 22900, 3486, 6497, 146540, 6494, 8021, 84083, 84289, 8409, 55226, 5361, 3297, 7337, 8726, 7342, 7343, 84893, 10728, 374655, 8243, 55920, 51493, 8242, 51491, 1431, 138151, 8761, 7329, 310, 8241, 2975, 1843, 6888, 7335, 6472, 8445, 6477, 8427, 221927, 324, 22907, 7317, 7316, 10743, 10075, 1831, 2963, 22913, 55929, 22916, 203068, 988, 27161, 10951, …	1944	2250	5890	1.07593	0.503924	0.0617414	1.18853
GOTERM_CC_DIRECT	GO:0005783~endoplasmic reticulum	140	6.69856	0.00116961	10998, 10999, 4041, 84272, 22872, 23516, 57205, 8678, 51371, 488, 51009, 7355, 79888, 11018, 55379, 10613, 6418, 7163, 2010, 10330, 3710, 55851, 55754, 476, 23471, 25, 10908, 23509, 1717, 4121, 10525, 824, 84912, 54732, 51594, 10273, 7415, 5355, 821, 6185, 55161, 92140, 84885, 10016, 23197, 10945, 9218, 58485, 55666, 51293, 819, 23392, 254531, 57142, 286451, 10491, 10280, 5621, 9183, 79139, 2781,…	1944	341	5890	1.24392	0.657674	0.0854587	1.81174
GOTERM_CC_DIRECT	GO:0005769~early endosome	51	2.44019	0.00118673	2647, 23200, 26750, 85377, 55435, 51009, 3482, 63894, 9101, 4924, 7251, 10807, 25930, 5605, 5119, 150684, 5604, 112936, 56850, 26119, 51479, 11188, 9114, 8829, 8724, 5878, 142678, 22853, 10043, 1889, 10228, 8073, 11031, 3949, 23295, 26994, 23392, 6477, 23250, 5861, 23245, 124930, 5245, 79874, 6272, 10079, 3329, 10211, 79139, 10938, 4771	1944	105	5890	1.47163	0.663005	0.0802637	1.83802
GOTERM_CC_DIRECT	GO:0000790~nuclear chromatin	42	2.00957	0.00177567	6595, 7290, 116138, 64710, 6599, 3148, 6598, 7227, 9572, 6597, 1108, 138151, 8928, 9555, 1104, 57805, 9219, 1387, 4152, 4678, 3190, 86, 9612, 1857, 9611, 10036, 5928, 79892, 1874, 6256, 7157, 79711, 23492, 7319, 3183, 54840, 9960, 3066, 23028, 6601, 6778, 8334	1944	84	5890	1.51492	0.80367	0.109777	2.7384
GOTERM_CC_DIRECT	GO:0005802~trans-Golgi network	33	1.57895	0.00246936	5872, 10890, 10228, 8675, 8678, 6844, 8677, 85377, 1785, 79065, 3482, 66005, 10564, 23392, 4924, 4074, 84679, 2800, 6810, 116985, 27032, 1362, 286451, 6311, 10079, 8729, 163, 399687, 375, 57448, 23048, 5879, 23062	1944	63	5890	1.58706	0.896142	0.140137	3.78899
GOTERM_CC_DIRECT	GO:0030018~Z disc	21	1.00478	0.00272922	6717, 9531, 10049, 29780, 23224, 55742, 10273, 2316, 2317, 3728, 274, 667, 1499, 84033, 5525, 113146, 2280, 493, 103910, 81, 87	1944	35	5890	1.8179	0.918192	0.144836	4.17982
GOTERM_CC_DIRECT	GO:0005747~mitochondrial respiratory chain complex I	13	0.62201	0.00350726	4716, 4707, 4705, 4706, 4724, 4712, 4723, 4714, 4702, 4700, 4722, 11315, 4695	1944	18	5890	2.18821	0.959977	0.172471	5.34109
GOTERM_CC_DIRECT	GO:0030529~intracellular ribonucleoprotein complex	40	1.91388	0.00406237	23636, 3609, 7538, 27161, 3608, 9987, 22794, 8106, 8761, 11100, 2975, 27316, 3178, 2597, 3191, 3190, 81, 8445, 4809, 23020, 6628, 23521, 10236, 6311, 5094, 5036, 1653, 9728, 6201, 10128, 3183, 8826, 1655, 9961, 10146, 3181, 6191, 4691, 6194, 26986	1944	82	5890	1.47797	0.975976	0.187103	6.16156
GOTERM_CC_DIRECT	GO:0005604~basement membrane	17	0.813397	0.00440638	1282, 64093, 1294, 1955, 3339, 3371, 667, 2192, 3913, 3915, 1289, 7076, 3911, 80781, 3912, 7078, 1471	1944	27	5890	1.90767	0.982493	0.191766	6.66667
GOTERM_CC_DIRECT	GO:0016342~catenin complex	7	0.334928	0.00644192	10297, 324, 3728, 1495, 4092, 1499, 5818	1944	7	5890	3.02984	0.997314	0.256208	9.60376
GOTERM_CC_DIRECT	GO:0005635~nuclear envelope	40	1.91388	0.0067639	23636, 51493, 10424, 23511, 55746, 25777, 7329, 1861, 310, 4000, 667, 55161, 4928, 81565, 23468, 55379, 348995, 9798, 6396, 2010, 26012, 5905, 23225, 57142, 3837, 23224, 581, 27243, 100101267, 57122, 10280, 274, 5903, 2781, 10553, 7175, 9112, 6720, 11124, 142	1944	84	5890	1.44278	0.998004	0.25624	10.0603
GOTERM_CC_DIRECT	GO:0071564~npBAF complex	8	0.382775	0.00772287	6595, 6599, 6598, 55274, 6597, 6602, 6601, 86	1944	9	5890	2.69319	0.999176	0.275882	11.4075
GOTERM_CC_DIRECT	GO:0043209~myelin sheath	35	1.67464	0.0104064	9948, 1743, 4705, 5160, 7415, 7416, 10397, 23176, 821, 1808, 8775, 9377, 10963, 2923, 6648, 3710, 7284, 5245, 2806, 10681, 476, 4722, 10376, 3329, 7430, 4478, 6389, 10938, 1213, 71, 10121, 5315, 7203, 2821, 7384	1944	73	5890	1.45266	0.999931	0.340727	15.0775
GOTERM_CC_DIRECT	GO:0005912~adherens junction	14	0.669856	0.0104263	5796, 8751, 324, 1499, 55591, 84687, 4771, 10188, 6904, 54806, 64855, 1495, 4643, 5818	1944	22	5890	1.92808	0.999932	0.329698	15.1042
GOTERM_CC_DIRECT	GO:0005730~nucleolus	170	8.13397	0.0109211	56342, 2091, 1476, 3148, 9240, 10892, 9344, 64397, 6164, 57674, 1106, 3875, 9555, 1107, 7296, 5371, 10541, 387103, 23468, 10927, 23076, 23133, 4218, 26155, 9442, 51010, 56919, 55226, 3710, 3550, 23450, 25, 3692, 22984, 22985, 9875, 5036, 84681, 29903, 79159, 8726, 7343, 55651, 10813, 5936, 23064, 5935, 4691, 9643, 4609, 5253, 55920, 692312, 65083, 84294, 117246, 51491, 10528, 84298, 9807, 2316, 1…	1944	444	5890	1.16007	0.999957	0.331255	15.765
GOTERM_CC_DIRECT	GO:0032587~ruffle membrane	22	1.05263	0.0116642	54997, 5795, 1969, 83871, 50649, 324, 1915, 1785, 64787, 4641, 7430, 3688, 1729, 4830, 23286, 9026, 7094, 23396, 84687, 4771, 83543, 5879	1944	41	5890	1.62577	0.999978	0.338573	16.7483
GOTERM_CC_DIRECT	GO:0005811~lipid particle	19	0.909091	0.0125494	4047, 23130, 7415, 857, 10280, 51097, 8729, 79888, 27339, 23197, 10938, 2597, 29923, 3654, 5878, 10131, 2181, 84883, 23111	1944	34	5890	1.69314	0.999991	0.348478	17.9055
GOTERM_CC_DIRECT	GO:0016328~lateral plasma membrane	11	0.526316	0.0146349	5872, 23255, 8826, 324, 6904, 402, 1855, 23603, 4641, 3728, 1499	1944	16	5890	2.08301	0.999999	0.382644	20.5729
GOTERM_CC_DIRECT	GO:0005874~microtubule	57	2.72727	0.0225032	29127, 3476, 22974, 10397, 10540, 10297, 10381, 90990, 2010, 89796, 80279, 5116, 166614, 6645, 7280, 2801, 3619, 5605, 7283, 26153, 55755, 84445, 63971, 23160, 1855, 10376, 8826, 9112, 64837, 7203, 55920, 157922, 22919, 1785, 1808, 81565, 4134, 6904, 1267, 23098, 10801, 3799, 440307, 324, 3835, 8661, 1778, 3831, 22911, 10128, 7756, 908, 203068, 51143, 10749, 4957, 4281	1944	135	5890	1.27926	1	0.512718	29.9236
GOTERM_CC_DIRECT	GO:0005844~polysome	14	0.669856	0.0258381	5687, 10985, 9513, 1981, 27161, 1975, 7458, 6311, 6191, 10445, 2521, 8087, 440275, 6194	1944	24	5890	1.7674	1	0.550354	33.5669
GOTERM_CC_DIRECT	GO:0015630~microtubule cytoskeleton	33	1.57895	0.027229	22994, 121642, 22974, 10397, 14, 9927, 6709, 667, 10297, 6867, 9218, 5515, 5518, 2597, 4134, 6472, 8481, 55717, 4924, 9657, 9891, 3735, 63935, 207, 5395, 2963, 9584, 8826, 23063, 10121, 112752, 9055, 4281	1944	72	5890	1.38867	1	0.557684	35.0334
GOTERM_CC_DIRECT	GO:0036464~cytoplasmic ribonucleoprotein granule	10	0.478469	0.0286363	8826, 203068, 6191, 4691, 6158, 5879, 26986, 6128, 6194, 9475	1944	15	5890	2.01989	1	0.564682	36.4863
GOTERM_CC_DIRECT	GO:0010494~cytoplasmic stress granule	13	0.62201	0.0299154	1653, 7538, 7073, 26065, 8570, 1654, 1153, 6311, 8761, 5936, 10146, 4076, 26986	1944	22	5890	1.79036	1	0.569606	37.7805
GOTERM_CC_DIRECT	GO:0030426~growth cone	27	1.29187	0.0311414	9266, 1861, 1785, 22859, 10540, 1808, 7402, 3675, 1627, 90060, 25861, 23405, 8239, 267, 10236, 25, 1855, 10280, 3831, 7248, 8829, 8826, 84687, 7077, 808, 4628, 23064	1944	57	5890	1.43519	1	0.573579	38.9977
GOTERM_CC_DIRECT	GO:0030864~cortical actin cytoskeleton	9	0.430622	0.0324113	824, 9948, 7402, 11214, 4771, 84687, 80306, 1915, 10211	1944	13	5890	2.09758	1	0.577811	40.235
GOTERM_CC_DIRECT	GO:0005743~mitochondrial inner membrane	80	3.82775	0.0325915	84275, 1352, 11222, 10245, 8924, 84303, 28973, 115817, 125988, 30968, 3052, 1723, 1349, 10131, 1345, 81889, 204, 1340, 55052, 6648, 64432, 7284, 2806, 1327, 60488, 3954, 83858, 5832, 57129, 10476, 4695, 54968, 92609, 29074, 79590, 11331, 84545, 9489, 23788, 23787, 7384, 4707, 1374, 1373, 2356, 4705, 4706, 7416, 4702, 4700, 10975, 114789, 64969, 64968, 112724, 3030, 10469, 10632, 6472, 51258, 5701…	1944	201	5890	1.2059	1	0.569621	40.4086
GOTERM_CC_DIRECT	GO:0000502~proteasome complex	17	0.813397	0.0338724	5708, 9097, 7415, 5705, 5710, 5690, 10213, 7466, 5692, 5685, 7337, 5687, 10197, 5887, 5886, 23392, 9690	1944	32	5890	1.6096	1	0.573909	41.6294
GOTERM_CC_DIRECT	GO:0016514~SWI/SNF complex	8	0.382775	0.0363749	6595, 6599, 6598, 6597, 6602, 6601, 5925, 86	1944	11	5890	2.20352	1	0.590644	43.9473
GOTERM_CC_DIRECT	GO:0030122~AP-2 adaptor complex	8	0.382775	0.0363749	161, 26119, 163, 9779, 1956, 160, 1175, 1173	1944	11	5890	2.20352	1	0.590644	43.9473
GOTERM_CC_DIRECT	GO:0016581~NuRD complex	8	0.382775	0.0363749	9219, 1108, 5928, 138151, 1107, 3066, 54815, 5931	1944	11	5890	2.20352	1	0.590644	43.9473
GOTERM_CC_DIRECT	GO:0015629~actin cytoskeleton	41	1.96172	0.0380885	9368, 2316, 55742, 2317, 3728, 57727, 667, 9123, 9696, 1627, 23012, 30968, 79026, 81, 10445, 10801, 8379, 226, 55362, 7408, 25, 27, 274, 23164, 1398, 7430, 10552, 10625, 4627, 8826, 84687, 56928, 23607, 4628, 83543, 64855, 10109, 4643, 23603, 1495, 8178	1944	95	5890	1.30761	1	0.59831	45.4845
GOTERM_CC_DIRECT	GO:0005771~multivesicular body	6	0.287081	0.0432135	55240, 7178, 3916, 1471, 23392, 7251	1944	7	5890	2.597	1	0.636366	49.8497
GOTERM_CC_DIRECT	GO:0031258~lamellipodium membrane	6	0.287081	0.0432135	9780, 10297, 1464, 1969, 23224, 7408	1944	7	5890	2.597	1	0.636366	49.8497
GOTERM_CC_DIRECT	GO:0031430~M band	5	0.239234	0.043516	5525, 84033, 226, 6711, 4077	1944	5	5890	3.02984	1	0.629907	50.0968
GOTERM_CC_DIRECT	GO:0030131~clathrin adaptor complex	5	0.239234	0.043516	161, 163, 8907, 23062, 1173	1944	5	5890	3.02984	1	0.629907	50.0968
GOTERM_CC_DIRECT	GO:0001931~uropod	5	0.239234	0.043516	7430, 4478, 4627, 23396, 10211	1944	5	5890	3.02984	1	0.629907	50.0968
GOTERM_CC_DIRECT	GO:0016281~eukaryotic translation initiation factor 4F complex	5	0.239234	0.043516	1982, 1981, 1975, 7458, 8672	1944	5	5890	3.02984	1	0.629907	50.0968
GOTERM_CC_DIRECT	GO:0031982~vesicle	24	1.14833	0.0471185	2580, 29952, 8407, 9368, 1889, 83871, 84445, 10490, 6844, 8677, 64787, 207, 10540, 4478, 7430, 9218, 387, 2597, 79026, 808, 1471, 5315, 23603, 3799	1944	51	5890	1.4258	1	0.650982	52.9538
GOTERM_CC_DIRECT	GO:0005789~endoplasmic reticulum membrane	131	6.26794	0.0508276	26086, 79001, 10998, 10999, 4047, 10890, 22872, 57205, 8678, 1314, 488, 51009, 79888, 11018, 55379, 10613, 8396, 9919, 6009, 3710, 22883, 55851, 23646, 8733, 100101267, 23471, 9871, 10908, 1717, 23478, 5833, 116150, 56926, 51493, 10423, 54732, 51594, 79022, 7415, 5355, 57222, 310, 821, 6185, 55161, 27315, 92140, 10016, 51614, 90522, 10945, 114879, 9218, 84197, 10113, 254531, 57142, 58477, 81537, …	1944	350	5890	1.13402	1	0.670847	55.7348
GOTERM_CC_DIRECT	GO:0031252~cell leading edge	12	0.574163	0.0515779	7431, 8729, 81565, 375, 7283, 8826, 4627, 133746, 25, 10109, 9578, 667	1944	21	5890	1.73133	1	0.66794	56.2783
GOTERM_CC_DIRECT	GO:0032040~small-subunit processome	12	0.574163	0.0515779	65083, 84294, 6201, 2091, 55127, 5822, 10607, 10528, 10813, 79050, 22984, 4809	1944	21	5890	1.73133	1	0.66794	56.2783
GOTERM_CC_DIRECT	GO:0045111~intermediate filament cytoskeleton	14	0.669856	0.0534944	6595, 1198, 23224, 10273, 29115, 1107, 23650, 667, 5339, 7431, 55968, 6867, 51447, 4795	1944	26	5890	1.63145	1	0.673432	57.6383
GOTERM_CC_DIRECT	GO:0019898~extrinsic component of membrane	16	0.76555	0.0536407	23130, 8678, 85377, 23218, 26100, 5621, 4478, 7430, 7175, 8724, 4771, 2037, 10018, 5774, 9810, 65065	1944	31	5890	1.56379	1	0.666418	57.7405
GOTERM_CC_DIRECT	GO:0016023~cytoplasmic, membrane-bounded vesicle	26	1.24402	0.0556163	29952, 5064, 9344, 9097, 8678, 4641, 667, 20, 63894, 10564, 9798, 5585, 23392, 149951, 25930, 150684, 5170, 1855, 6272, 3831, 10280, 161, 51604, 55704, 23048, 5879	1944	57	5890	1.38203	1	0.672161	59.0979
GOTERM_CC_DIRECT	GO:0005911~cell-cell junction	32	1.5311	0.0559276	5311, 9948, 25945, 10890, 2316, 9578, 30011, 3728, 360, 1499, 2195, 83461, 81, 8502, 23322, 87, 1445, 5796, 5795, 5605, 200576, 207, 10211, 351, 8826, 7094, 29766, 54806, 56288, 79778, 1495, 4643	1944	73	5890	1.32815	1	0.66656	59.3081
GOTERM_CC_DIRECT	GO:0012507~ER to Golgi transport vesicle membrane	13	0.62201	0.0625216	2348, 6721, 22872, 10490, 9871, 22937, 10959, 51128, 6720, 6396, 3106, 567, 3105	1944	24	5890	1.64116	1	0.700879	63.5287
GOTERM_CC_DIRECT	GO:0000794~condensed nuclear chromosome	8	0.382775	0.0628583	8243, 65083, 10128, 5119, 7283, 6839, 1104, 25777	1944	12	5890	2.01989	1	0.69558	63.7328
GOTERM_CC_DIRECT	GO:0005871~kinesin complex	10	0.478469	0.0707874	81565, 90990, 26153, 63971, 3835, 10749, 7531, 64837, 3831, 3799	1944	17	5890	1.78226	1	0.732501	68.2413
GOTERM_CC_DIRECT	GO:0000123~histone acetyltransferase complex	10	0.478469	0.0707874	9767, 8518, 1387, 284058, 23338, 51230, 84148, 10445, 3054, 11091	1944	17	5890	1.78226	1	0.732501	68.2413
GOTERM_CC_DIRECT	GO:0012505~endomembrane system	21	1.00478	0.0714457	80279, 23637, 10424, 5119, 9368, 9351, 340371, 64398, 2475, 26001, 84315, 57605, 54662, 115704, 23396, 56288, 55353, 10018, 23061, 65065, 23102	1944	45	5890	1.41392	1	0.729035	68.591
GOTERM_CC_DIRECT	GO:0042645~mitochondrial nucleoid	15	0.717703	0.0826938	5428, 116447, 6648, 1373, 7284, 22907, 7416, 22868, 9093, 10128, 55379, 3030, 7019, 6472, 5442	1944	30	5890	1.51492	1	0.775025	74.0365
GOTERM_CC_DIRECT	GO:0005697~telomerase holoenzyme complex	9	0.430622	0.0832927	6628, 54552, 55135, 3183, 55226, 55651, 54433, 10728, 23381	1944	15	5890	1.8179	1	0.771271	74.3001
GOTERM_CC_DIRECT	GO:0036020~endolysosome membrane	6	0.287081	0.0843105	161, 163, 1213, 160, 1175, 1173	1944	8	5890	2.27238	1	0.76936	74.7423
GOTERM_CC_DIRECT	GO:0031143~pseudopodium	6	0.287081	0.0843105	824, 4478, 5894, 81, 1267, 87	1944	8	5890	2.27238	1	0.76936	74.7423
GOTERM_CC_DIRECT	GO:0034098~VCP-NPL4-UFD1 AAA ATPase complex	6	0.287081	0.0843105	79139, 23197, 7415, 55666, 857, 11124	1944	8	5890	2.27238	1	0.76936	74.7423
GOTERM_CC_DIRECT	GO:0005868~cytoplasmic dynein complex	6	0.287081	0.0843105	51164, 7175, 51143, 10018, 1778, 10210	1944	8	5890	2.27238	1	0.76936	74.7423
GOTERM_CC_DIRECT	GO:0005903~brush border	11	0.526316	0.0860299	5339, 7430, 4627, 3710, 103910, 2317, 4628, 81, 4641, 4643, 87	1944	20	5890	1.66641	1	0.770407	75.4732
GOTERM_CC_DIRECT	GO:0000776~kinetochore	24	1.14833	0.0882601	8243, 5253, 8379, 5905, 3619, 51112, 100526739, 324, 3835, 23160, 84148, 57122, 23219, 10540, 387103, 9183, 81565, 4928, 23468, 7756, 7175, 348995, 6396, 51143	1944	54	5890	1.34659	1	0.773473	76.3917
GOTERM_CC_DIRECT	GO:0042555~MCM complex	5	0.239234	0.096652	4173, 4172, 4175, 4174, 79892	1944	6	5890	2.52486	1	0.799176	79.5673
GOTERM_CC_DIRECT	GO:0031965~nuclear membrane	47	2.2488	0.097858	23636, 8888, 57462, 9805, 55746, 1956, 22994, 25777, 1104, 1861, 5371, 4000, 92140, 9123, 4928, 22929, 10016, 9218, 2597, 84629, 51155, 2010, 23133, 26012, 26173, 23225, 5905, 3837, 327, 129787, 23224, 100101267, 30000, 51230, 25, 6272, 79050, 57122, 79711, 5903, 23560, 9589, 7175, 23108, 51246, 1471, 2000	1944	118	5890	1.2068	1	0.797873	79.9894
GOTERM_MF_DIRECT	GO:0044822~poly(A) RNA binding	325	15.5502	2.79945e-16	56342, 1198, 1476, 80742, 64397, 124245, 1728, 55379, 1729, 1975, 7165, 6613, 11325, 280636, 55226, 56919, 6217, 9875, 1982, 1983, 23264, 1981, 7073, 7175, 7343, 7178, 55651, 7203, 1495, 8243, 55920, 84294, 51493, 692312, 51593, 55119, 51491, 84298, 1431, 9987, 22794, 2316, 2317, 7329, 8106, 8761, 22919, 310, 821, 8241, 92140, 23013, 23524, 9991, 327, 3837, 23521, 226, 7317, 9898, 22907, 7316, 22…	1893	682	5656	1.42383	5.20251e-13	5.20251e-13	5.55112e-13
GOTERM_MF_DIRECT	GO:0005515~protein binding	1305	62.4402	4.85671e-08	55233, 55234, 80742, 84272, 23654, 5373, 3476, 54108, 5371, 25796, 23650, 949, 334, 5376, 221937, 3482, 6867, 1822, 25792, 8737, 3486, 22900, 6497, 6494, 146540, 8021, 84289, 84083, 8409, 8407, 6091, 23647, 55226, 8733, 23646, 50618, 3297, 7337, 8729, 29903, 8726, 7343, 738, 8724, 84895, 84893, 10728, 1819, 55920, 8243, 23636, 84294, 23637, 51493, 8030, 138151, 5355, 7329, 25777, 8761, 22919, 732…	1893	3627	5656	1.07503	7.5859e-05	3.79302e-05	8.10913e-05
GOTERM_MF_DIRECT	GO:0098641~cadherin binding involved in cell-cell adhesion	92	4.40191	8.12019e-07	10890, 7706, 55082, 55742, 6164, 3875, 10399, 85377, 10397, 23650, 3728, 9414, 10298, 10652, 55379, 6520, 1627, 9101, 9798, 2010, 3190, 8971, 3054, 2801, 8407, 6455, 23647, 9351, 23367, 7408, 64787, 2802, 23164, 1982, 1983, 3688, 1981, 8350, 471, 1654, 8826, 23607, 55324, 64837, 5315, 11336, 5214, 1495, 27044, 9531, 10528, 1956, 3069, 2316, 2317, 22919, 6709, 1499, 9218, 79026, 30844, 51510, 1080…	1893	179	5656	1.53565	0.00126757	0.000422702	0.0013558
GOTERM_MF_DIRECT	GO:0003682~chromatin binding	98	4.689	5.27197e-06	116138, 3720, 2005, 1104, 23468, 1387, 23133, 6497, 3150, 26155, 84289, 8409, 6294, 79892, 9918, 4297, 8726, 7175, 7343, 7936, 6015, 6602, 6601, 4791, 64324, 8243, 23636, 56981, 64710, 7227, 1786, 27316, 9219, 5563, 10274, 1460, 6472, 5428, 4174, 55870, 5426, 22907, 80854, 23492, 57680, 7913, 51317, 1059, 5431, 11128, 9031, 6595, 165918, 6599, 57634, 6829, 10951, 10194, 57727, 7020, 23613, 57585,…	1893	200	5656	1.46405	0.00820103	0.00205659	0.00880212
GOTERM_MF_DIRECT	GO:0019901~protein kinase binding	82	3.92344	5.35735e-05	988, 7538, 112, 148022, 29127, 11190, 200734, 9555, 22974, 10899, 3728, 2475, 7402, 572, 6497, 10131, 2997, 80279, 4217, 4218, 5796, 5795, 25930, 2801, 6009, 5606, 11140, 5604, 8874, 55755, 3091, 5170, 476, 57521, 51094, 1855, 7443, 54461, 3297, 161, 9113, 4830, 8826, 117584, 160, 9961, 9055, 5879, 6194, 55920, 1956, 1915, 7416, 1785, 9093, 57659, 1499, 1808, 1030, 1031, 5829, 10985, 5728, 1464, …	1893	169	5656	1.44973	0.0802781	0.0165975	0.0894127
GOTERM_MF_DIRECT	GO:0005524~ATP binding	256	12.2488	0.000127816	10998, 1198, 79705, 57205, 340371, 5634, 156, 8737, 11325, 4217, 84083, 3098, 203, 166614, 204, 56919, 55226, 25, 27, 207, 10477, 84893, 7203, 5214, 7204, 440275, 8243, 51493, 1459, 1455, 7326, 7329, 16, 25778, 7328, 4641, 20, 23012, 25902, 84197, 23396, 7046, 8445, 83732, 9891, 1445, 23387, 3735, 22907, 7317, 3835, 10079, 65125, 7319, 5631, 2963, 908, 10606, 4627, 7322, 150094, 4628, 10749, 9188…	1893	637	5656	1.20077	0.180992	0.0327292	0.213197
GOTERM_MF_DIRECT	GO:0003723~RNA binding	117	5.59809	0.00341302	2091, 10291, 6164, 8672, 4928, 10921, 10922, 1975, 27336, 9444, 51010, 23067, 6217, 6154, 8939, 9739, 23450, 22984, 6158, 1982, 1981, 7073, 5937, 7936, 55651, 92609, 5936, 5935, 10147, 4691, 26986, 5931, 10528, 6301, 22794, 8106, 8761, 10521, 1786, 10523, 27316, 104, 103, 1267, 4809, 8233, 9991, 8661, 8666, 8664, 5813, 6201, 10128, 22913, 22916, 10605, 10594, 79039, 9513, 55135, 6726, 8570, 11222…	1893	282	5656	1.23964	0.995205	0.533685	5.54851
GOTERM_MF_DIRECT	GO:0031492~nucleosomal DNA binding	14	0.669856	0.00380051	6599, 6598, 1108, 6597, 5928, 9555, 1104, 9219, 3183, 8350, 3066, 6601, 86, 3150	1893	20	5656	2.09149	0.997388	0.524535	6.15982
GOTERM_MF_DIRECT	GO:0051087~chaperone binding	23	1.10048	0.00589481	10525, 9531, 10049, 96459, 3301, 55135, 10963, 388591, 581, 11140, 10681, 476, 51608, 10294, 7157, 5621, 3329, 4967, 7248, 10469, 3106, 6904, 267	1893	41	5656	1.67611	0.999902	0.6416	9.39995
GOTERM_MF_DIRECT	GO:0032403~protein complex binding	46	2.20096	0.00651757	10998, 9531, 55135, 1373, 9368, 114803, 3476, 22994, 7416, 1785, 4702, 22937, 8241, 2192, 81565, 8775, 23191, 3030, 8737, 9798, 4678, 6921, 10657, 9810, 29888, 5792, 2908, 6711, 10491, 28964, 57521, 5903, 409, 163, 3688, 9114, 466, 8826, 160, 203068, 6720, 23607, 5214, 7919, 4609, 7384	1893	98	5656	1.40246	0.999963	0.639901	10.343
GOTERM_MF_DIRECT	GO:0019899~enzyme binding	63	3.01435	0.007872	7538, 6829, 5894, 5578, 10951, 9555, 10399, 84148, 488, 6522, 51631, 3482, 29894, 9657, 3091, 2806, 6256, 1855, 207, 22985, 835, 409, 3916, 1655, 875, 23028, 7204, 5879, 5509, 3141, 23054, 1956, 51596, 22794, 10273, 7329, 1785, 11100, 57805, 1499, 23326, 5728, 3837, 5245, 54583, 950, 5094, 857, 3159, 6272, 7157, 351, 1398, 11315, 790, 25814, 463, 2280, 79035, 3066, 7531, 7009, 142	1893	143	5656	1.31633	0.999996	0.674453	12.3621
GOTERM_MF_DIRECT	GO:0003779~actin binding	46	2.20096	0.00815539	57553, 55742, 2317, 80306, 4641, 54434, 55740, 6709, 667, 7169, 22921, 7402, 9696, 1627, 23012, 1729, 2010, 81, 3636, 6645, 6712, 29780, 226, 23224, 6711, 133746, 64787, 7408, 23164, 5339, 7430, 4478, 3688, 10552, 57180, 4627, 4771, 29766, 55704, 4628, 2037, 4649, 80179, 9645, 64423, 142678	1893	99	5656	1.38829	0.999997	0.655586	12.7792
GOTERM_MF_DIRECT	GO:0008137~NADH dehydrogenase (ubiquinone) activity	12	0.574163	0.00816466	4716, 4707, 4705, 4706, 4712, 4695, 4724, 4723, 4714, 4702, 4700, 4722	1893	17	5656	2.10907	0.999997	0.626576	12.7928
GOTERM_MF_DIRECT	GO:0005543~phospholipid binding	17	0.813397	0.00832512	23636, 2733, 5051, 6712, 116987, 1373, 6464, 6711, 2806, 84100, 6844, 308, 23218, 5724, 55968, 572, 65065	1893	28	5656	1.81405	0.999998	0.606523	13.028
GOTERM_MF_DIRECT	GO:0002020~protease binding	21	1.00478	0.0111563	4798, 6717, 5428, 1857, 1476, 10892, 7316, 5345, 7157, 10211, 3949, 79139, 3688, 3675, 117584, 7077, 7076, 1471, 3554, 7078, 219743	1893	38	5656	1.65118	1	0.689096	17.0822
GOTERM_MF_DIRECT	GO:0051015~actin filament binding	28	1.33971	0.0113918	9948, 1956, 2316, 7169, 7402, 23191, 9026, 81, 87, 8409, 23224, 25, 27, 274, 7430, 10128, 10552, 399687, 4627, 7094, 84687, 4628, 83543, 79778, 10109, 23603, 1495, 4643	1893	55	5656	1.52109	1	0.673234	17.4114
GOTERM_MF_DIRECT	GO:0000166~nucleotide binding	70	3.34928	0.0119107	22978, 10999, 155435, 125950, 10921, 1975, 27336, 3191, 1153, 80004, 29890, 29896, 26528, 55696, 4841, 23067, 10236, 6294, 476, 55362, 9739, 22985, 3615, 7307, 3187, 84681, 3491, 9584, 7073, 10101, 5937, 3183, 7936, 5936, 10146, 5935, 3181, 4691, 26986, 8888, 51593, 54439, 9987, 8106, 8761, 8241, 20, 27316, 23013, 109, 3178, 28951, 54502, 2521, 57466, 10772, 8233, 6434, 9991, 79171, 55147, 5426, …	1893	164	5656	1.2753	1	0.667445	18.1321
GOTERM_MF_DIRECT	GO:0042802~identical protein binding	133	6.36364	0.0120294	1198, 79705, 1294, 4598, 5634, 334, 10540, 91039, 1728, 27339, 3482, 8737, 7164, 23647, 6091, 3550, 51094, 4297, 207, 3297, 274, 5832, 8726, 4830, 875, 84547, 6778, 23064, 4691, 9055, 210, 22794, 7415, 2317, 25777, 22919, 8241, 55722, 27316, 81565, 3949, 10016, 5565, 2597, 1460, 6472, 5805, 6477, 90933, 1445, 4175, 112483, 327, 226, 286451, 5621, 7431, 25814, 790, 5631, 3939, 10606, 7534, 10188, …	1893	336	5656	1.18269	1	0.650137	18.2962
GOTERM_MF_DIRECT	GO:0003725~double-stranded RNA binding	19	0.909091	0.014617	3609, 27161, 26065, 3608, 22907, 10376, 3329, 92140, 7431, 1653, 4478, 6520, 23180, 1213, 23405, 54840, 104, 9188, 87	1893	34	5656	1.66968	1	0.701964	21.7967
GOTERM_MF_DIRECT	GO:0005198~structural molecule activity	26	1.24402	0.0149246	3875, 1314, 3728, 4000, 9696, 4134, 80781, 84823, 9475, 6645, 8661, 857, 10376, 2794, 22820, 7431, 84313, 3913, 1213, 203068, 2037, 3911, 4957, 3912, 9019, 1495	1893	51	5656	1.52322	1	0.690995	22.2033
GOTERM_MF_DIRECT	GO:0031625~ubiquitin protein ligase binding	66	3.15789	0.0155648	8678, 5371, 8924, 9927, 7167, 10613, 27338, 8737, 63893, 6613, 6497, 56254, 4157, 7251, 3305, 3301, 3091, 5925, 5036, 10376, 409, 54926, 55611, 117584, 8451, 875, 71, 7384, 1956, 22794, 10273, 7326, 7415, 7329, 387521, 7328, 23197, 28951, 7335, 55666, 4092, 9810, 23111, 5905, 5566, 5094, 7466, 7157, 7319, 3329, 997, 79139, 10128, 5576, 203068, 7534, 5430, 10188, 7531, 11124, 7009, 2821, 23381, 81…	1893	155	5656	1.27225	1	0.688647	23.0432
GOTERM_MF_DIRECT	GO:0019904~protein domain specific binding	43	2.05742	0.0217921	55920, 3148, 5781, 50649, 8928, 7415, 3476, 11190, 81559, 9414, 2475, 64398, 3675, 9218, 1822, 23405, 9798, 8364, 1460, 6497, 8367, 5119, 3837, 23647, 27243, 5981, 476, 1874, 835, 409, 7430, 57661, 58506, 4627, 8826, 3916, 203068, 7534, 808, 7531, 11124, 2181, 23129	1893	96	5656	1.33831	1	0.790776	30.78
GOTERM_MF_DIRECT	GO:0042393~histone binding	27	1.29187	0.0226065	165918, 6595, 114803, 1106, 1104, 10541, 11198, 23613, 6830, 11176, 6418, 8364, 55352, 5585, 56254, 8367, 26155, 83746, 5928, 9918, 57649, 57680, 7913, 51317, 8350, 9960, 1164	1893	55	5656	1.46676	1	0.788366	31.7359
GOTERM_MF_DIRECT	GO:0003730~mRNA 3'-UTR binding	14	0.669856	0.029008	9728, 7538, 10644, 10921, 3183, 10236, 1153, 5936, 23367, 3181, 56254, 8087, 26986, 9810	1893	24	5656	1.74291	1	0.852785	38.8293
GOTERM_MF_DIRECT	GO:0004672~protein kinase activity	63	3.01435	0.0330551	2580, 5891, 5128, 1198, 79705, 1147, 5164, 5894, 5578, 9344, 26750, 340371, 7297, 156, 984, 2475, 10298, 84033, 50488, 8737, 10922, 5585, 5601, 29941, 4217, 6732, 5605, 415116, 56997, 5606, 30849, 5604, 5170, 25, 27, 207, 7443, 11183, 84687, 440275, 1459, 1455, 1956, 9261, 9263, 9578, 3984, 83983, 28996, 23012, 84197, 28951, 5563, 9020, 7046, 3654, 10114, 9891, 23387, 22868, 65125, 790, 10188	1893	152	5656	1.23839	1	0.877567	42.95
GOTERM_MF_DIRECT	GO:0004674~protein serine/threonine kinase activity	67	3.20574	0.0435543	5128, 2580, 5891, 1198, 79705, 23235, 5894, 5578, 9344, 26750, 340371, 984, 2475, 10298, 84033, 50488, 8737, 10922, 5585, 4217, 29941, 166614, 6732, 5605, 415116, 5606, 30849, 26524, 5604, 5170, 207, 7443, 11183, 9113, 8986, 7204, 440275, 1459, 22853, 1455, 9261, 9263, 25778, 2931, 9578, 6793, 3984, 83983, 28996, 23012, 5563, 1460, 9020, 7046, 3654, 10114, 8445, 9475, 83732, 9891, 657, 23387, 556…	1893	165	5656	1.21325	1	0.931114	52.4566
GOTERM_MF_DIRECT	GO:0043996~histone acetyltransferase activity (H4-K8 specific)	6	0.287081	0.0458476	284058, 51230, 84148, 10445, 3054, 11091	1893	7	5656	2.56101	1	0.933801	54.3246
GOTERM_MF_DIRECT	GO:0046972~histone acetyltransferase activity (H4-K16 specific)	6	0.287081	0.0458476	284058, 51230, 84148, 10445, 3054, 11091	1893	7	5656	2.56101	1	0.933801	54.3246
GOTERM_MF_DIRECT	GO:0043995~histone acetyltransferase activity (H4-K5 specific)	6	0.287081	0.0458476	284058, 51230, 84148, 10445, 3054, 11091	1893	7	5656	2.56101	1	0.933801	54.3246
GOTERM_MF_DIRECT	GO:0008143~poly(A) binding	6	0.287081	0.0458476	1653, 9987, 1654, 8761, 10657, 26986	1893	7	5656	2.56101	1	0.933801	54.3246
GOTERM_MF_DIRECT	GO:0050839~cell adhesion molecule binding	10	0.478469	0.0508076	7430, 4478, 25945, 3688, 5781, 55714, 819, 3728, 22859, 5818	1893	16	5656	1.86741	1	0.945463	58.1313
GOTERM_MF_DIRECT	GO:0016887~ATPase activity	32	1.5311	0.0553451	6595, 6597, 55729, 10856, 57674, 7415, 1861, 57130, 667, 20, 90990, 10632, 10061, 4363, 26153, 63971, 5705, 3835, 1778, 22985, 3329, 522, 5395, 399687, 10476, 4627, 1654, 55324, 10749, 80179, 7919, 81570	1893	72	5656	1.32793	1	0.953424	61.3506
GOTERM_MF_DIRECT	GO:0005178~integrin binding	20	0.956938	0.0583666	1956, 8751, 8754, 310, 667, 2192, 7402, 3675, 3688, 11188, 3491, 3913, 7094, 7077, 1289, 3911, 11096, 81, 5829, 87	1893	41	5656	1.45749	1	0.956337	63.3637
GOTERM_MF_DIRECT	GO:0008013~beta-catenin binding	17	0.813397	0.0686801	9231, 1857, 5796, 5795, 9368, 324, 9351, 9739, 1855, 30851, 10498, 57680, 10297, 23607, 1495, 5829, 4092	1893	34	5656	1.49392	1	0.972268	69.5174
GOTERM_MF_DIRECT	GO:0000287~magnesium ion binding	38	1.81818	0.0764836	23235, 3607, 1455, 23200, 57205, 55276, 5634, 9578, 83983, 23012, 283871, 54974, 8445, 23250, 54997, 4217, 64121, 5728, 6732, 8566, 58478, 23387, 25, 3612, 27, 10079, 79077, 65125, 55556, 5631, 375, 4830, 9113, 11165, 150094, 8986, 5315, 3421	1893	90	5656	1.26154	1	0.979429	73.5127
GOTERM_MF_DIRECT	GO:0051287~NAD binding	10	0.478469	0.0767106	3939, 3030, 9380, 2597, 84656, 4723, 191, 6652, 3421, 142	1893	17	5656	1.75756	1	0.977127	73.6212
GOTERM_MF_DIRECT	GO:0061631~ubiquitin conjugating enzyme activity	10	0.478469	0.0767106	997, 54926, 10477, 27338, 7322, 63893, 7326, 57448, 7328, 7319	1893	17	5656	1.75756	1	0.977127	73.6212
GOTERM_MF_DIRECT	GO:0031491~nucleosome binding	7	0.334928	0.077595	165918, 7290, 11198, 26155, 6830, 116092, 50809	1893	10	5656	2.09149	1	0.97554	74.04
GOTERM_MF_DIRECT	GO:0031072~heat shock protein binding	14	0.669856	0.0805219	3305, 7538, 10049, 11140, 10294, 3297, 3984, 4967, 7266, 7175, 7019, 3066, 11124, 3654	1893	27	5656	1.54926	1	0.9764	75.3816
GOTERM_MF_DIRECT	GO:0008017~microtubule binding	36	1.72249	0.0814928	55920, 23255, 26146, 29127, 1108, 157922, 25777, 1785, 10397, 1808, 81565, 9857, 10297, 9218, 90990, 2597, 4134, 10018, 3799, 8409, 2801, 26153, 55755, 63971, 324, 3835, 23160, 5621, 7430, 10128, 7756, 7178, 55704, 10749, 9055, 4281	1893	85	5656	1.26544	1	0.974985	75.8121
GOTERM_MF_DIRECT	GO:0003712~transcription cofactor activity	17	0.813397	0.0885053	27044, 5784, 100507290, 865, 2005, 5705, 8625, 9282, 55578, 23613, 1653, 22913, 51317, 1387, 1655, 64324, 374655	1893	35	5656	1.45124	1	0.980003	78.7174
GOTERM_MF_DIRECT	GO:0003743~translation initiation factor activity	17	0.813397	0.0885053	27161, 8661, 8672, 3692, 8667, 8666, 8665, 8664, 1982, 1983, 1981, 27335, 27102, 1975, 7458, 728689, 56478	1893	35	5656	1.45124	1	0.980003	78.7174
GOTERM_MF_DIRECT	GO:0070063~RNA polymerase binding	6	0.287081	0.0890049	7538, 57661, 8106, 905, 10541, 274	1893	8	5656	2.24089	1	0.978328	78.9113
GOTERM_MF_DIRECT	GO:0017166~vinculin binding	6	0.287081	0.0890049	51493, 7402, 7094, 5829, 87, 1495	1893	8	5656	2.24089	1	0.978328	78.9113
GOTERM_MF_DIRECT	GO:0005089~Rho guanyl-nucleotide exchange factor activity	15	0.717703	0.0915045	84033, 23370, 7410, 9138, 11214, 8874, 50649, 128272, 9828, 23365, 55701, 64787, 7204, 50618, 29	1893	30	5656	1.49392	1	0.978582	79.8569
GOTERM_MF_DIRECT	GO:0035064~methylated histone binding	15	0.717703	0.0915045	5253, 84289, 83746, 84656, 23378, 84148, 7158, 23492, 23613, 23468, 57680, 10927, 23133, 26147, 11091	1893	30	5656	1.49392	1	0.978582	79.8569
INTERPRO	IPR001715:Calponin homology domain	23	1.10048	0.000501578	57553, 8407, 6712, 29780, 23224, 6711, 8874, 55742, 157922, 2316, 2317, 22919, 85377, 667, 5339, 7402, 7410, 8826, 81, 89797, 79778, 9645, 87	1967	36	5942	1.92998	0.754454	0.754454	0.892422
INTERPRO	IPR016024:Armadillo-type fold	81	3.8756	0.000828317	114928, 23511, 22870, 8672, 3728, 9701, 2475, 10297, 1729, 54914, 63892, 27335, 8502, 10153, 9657, 23214, 26155, 55127, 5708, 100131755, 30849, 30000, 57521, 23218, 79050, 9918, 51566, 79711, 9875, 161, 1982, 8729, 1983, 163, 55291, 1981, 7248, 80823, 160, 23063, 79798, 25831, 29978, 79567, 7866, 4048, 51594, 93436, 8943, 1499, 23352, 5518, 10274, 10564, 64374, 8239, 6904, 23392, 55153, 8189, 230…	1967	180	5942	1.35938	0.901669	0.686423	1.46971
INTERPRO	IPR001965:Zinc finger, PHD-type	31	1.48325	0.0085616	4302, 5253, 8242, 1108, 1107, 22992, 23613, 23469, 11176, 55274, 6942, 26147, 23133, 84289, 5927, 55870, 7468, 9757, 51230, 54620, 4297, 8085, 57649, 10743, 51317, 9767, 57661, 9031, 23338, 64324, 7862	1967	62	5942	1.51042	1	0.999672	14.2414
INTERPRO	IPR019786:Zinc finger, PHD-type, conserved site	24	1.14833	0.00911448	4302, 5253, 8242, 84289, 5927, 1108, 55870, 1107, 7468, 51230, 22992, 54620, 57649, 23613, 23469, 51317, 9767, 57661, 9031, 26147, 23133, 23338, 7862, 64324	1967	45	5942	1.61112	1	0.99835	15.0919
INTERPRO	IPR019787:Zinc finger, PHD-finger	28	1.33971	0.00974299	4302, 5253, 8242, 1108, 1107, 22992, 23613, 23469, 11176, 55274, 26147, 23133, 84289, 5927, 55870, 7468, 9757, 54620, 4297, 8085, 57649, 51317, 9767, 57661, 9031, 23338, 7862, 64324	1967	55	5942	1.53788	1	0.995834	16.0491
INTERPRO	IPR000504:RNA recognition motif domain	53	2.53589	0.0114587	155435, 125950, 10921, 1975, 27336, 3191, 1153, 80004, 29890, 29896, 55696, 26528, 4841, 23067, 10236, 6294, 9739, 7307, 3187, 7073, 9584, 3183, 5937, 7936, 10146, 5936, 5935, 3181, 4691, 26986, 54439, 9987, 8761, 8106, 8241, 27316, 23013, 3178, 54502, 2521, 57466, 10772, 8233, 9991, 6434, 79171, 55147, 8666, 22913, 10644, 22916, 7458, 6428	1967	120	5942	1.33421	1	0.995375	18.6104
INTERPRO	IPR003616:Post-SET domain	10	0.478469	0.0164511	6839, 55870, 23067, 29072, 7468, 9739, 9757, 64324, 4297, 8085	1967	14	5942	2.15775	1	0.998684	25.6501
INTERPRO	IPR001589:Actinin-type, actin-binding, conserved site	10	0.478469	0.0164511	5339, 7402, 6712, 23224, 6711, 2316, 2317, 81, 87, 667	1967	14	5942	2.15775	1	0.998684	25.6501
INTERPRO	IPR017441:Protein kinase, ATP binding site	64	3.0622	0.0205809	5128, 5891, 1198, 23235, 1147, 2050, 5894, 5578, 9344, 7297, 156, 10298, 84033, 50488, 5585, 4217, 29941, 166614, 6732, 415116, 5605, 5606, 26524, 5604, 5170, 25, 27, 207, 7443, 2261, 11183, 8986, 440275, 1459, 22853, 1455, 1956, 9261, 9263, 25778, 2931, 9578, 6793, 3984, 83983, 28996, 23012, 5563, 9020, 7046, 3654, 8445, 10114, 9475, 9891, 1445, 657, 23387, 1969, 5566, 2870, 27102, 150094, 10188	1967	153	5942	1.26362	1	0.999308	31.0349
INTERPRO	IPR012677:Nucleotide-binding, alpha-beta plait	58	2.77512	0.0213957	155435, 125950, 10921, 1975, 27336, 3191, 1153, 80004, 29890, 29896, 55696, 26528, 4841, 23067, 10236, 6294, 55362, 9739, 22985, 7307, 3187, 9584, 7073, 5937, 3183, 7936, 5936, 10146, 5935, 3181, 4691, 26986, 8888, 51593, 54439, 9987, 8106, 8761, 8241, 27316, 23013, 3178, 54502, 2521, 57466, 10772, 8233, 9991, 6434, 79171, 55147, 8666, 22913, 10644, 22916, 7458, 6428, 9188	1967	137	5942	1.2789	1	0.998801	32.0528
INTERPRO	IPR023214:HAD-like domain	18	0.861244	0.0214994	22978, 58478, 23200, 27032, 5373, 57205, 64943, 476, 57130, 10079, 488, 493, 283871, 57605, 92609, 58190, 23250, 10106	1967	33	5942	1.64773	1	0.997719	32.1814
INTERPRO	IPR000953:Chromo domain/shadow	12	0.574163	0.0225669	23468, 57680, 6599, 1108, 6839, 10951, 1106, 1107, 6601, 84148, 55636, 23492	1967	19	5942	1.9079	1	0.996997	33.4913
INTERPRO	IPR000225:Armadillo	11	0.526316	0.0257129	163, 10297, 3837, 100131755, 93436, 324, 8502, 3728, 79798, 51566, 1499	1967	17	5942	1.95466	1	0.997703	37.214
INTERPRO	IPR011989:Armadillo-like helical	45	2.15311	0.0296349	79567, 114928, 7866, 93436, 8943, 3728, 1499, 2475, 10297, 54914, 5518, 64374, 63892, 10564, 6904, 8502, 23392, 8189, 23098, 55832, 23214, 10985, 55127, 3837, 100131755, 30849, 9933, 221927, 83787, 324, 30000, 57521, 9918, 51566, 79711, 22820, 161, 25814, 163, 160, 80823, 79798, 11260, 55671, 25831	1967	104	5942	1.3071	1	0.998462	41.5799
INTERPRO	IPR008271:Serine/threonine-protein kinase, active site	59	2.82297	0.0302481	2580, 5891, 5128, 1198, 1147, 23235, 5894, 5578, 9344, 156, 984, 84033, 50488, 8737, 5585, 5601, 29941, 4217, 166614, 6732, 415116, 5605, 5606, 30849, 26524, 5604, 5170, 207, 7443, 9113, 8986, 7204, 440275, 1459, 1455, 9261, 9263, 25778, 2931, 9578, 6793, 83983, 28996, 23012, 5563, 9020, 7046, 3654, 8445, 10114, 9475, 9891, 657, 23387, 5566, 2870, 65125, 27102, 150094	1967	142	5942	1.25514	1	0.997847	42.2361
INTERPRO	IPR011991:Winged helix-turn-helix DNA-binding domain	37	1.77033	0.031319	3607, 8533, 6599, 2005, 114803, 8928, 5993, 3006, 221937, 2873, 5989, 27335, 29893, 5885, 103, 8971, 65992, 23020, 1857, 22887, 6689, 23367, 200576, 1874, 1855, 3297, 5036, 2963, 84313, 8451, 23028, 728689, 2114, 6601, 8178, 50809, 2000	1967	83	5942	1.34664	1	0.997362	43.3652
INTERPRO	IPR018303:P-type ATPase, phosphorylation site	9	0.430622	0.0329971	493, 23200, 27032, 57205, 476, 57130, 10079, 23250, 488	1967	13	5942	2.09135	1	0.997177	45.0929
INTERPRO	IPR023299:P-type ATPase, cytoplasmic domain N	9	0.430622	0.0329971	493, 23200, 27032, 57205, 476, 57130, 10079, 23250, 488	1967	13	5942	2.09135	1	0.997177	45.0929
INTERPRO	IPR001757:Cation-transporting P-type ATPase	9	0.430622	0.0329971	493, 23200, 27032, 57205, 476, 57130, 10079, 23250, 488	1967	13	5942	2.09135	1	0.997177	45.0929
INTERPRO	IPR008250:P-type ATPase, A domain	9	0.430622	0.0329971	493, 23200, 27032, 57205, 476, 57130, 10079, 23250, 488	1967	13	5942	2.09135	1	0.997177	45.0929
INTERPRO	IPR000048:IQ motif, EF-hand binding site	15	0.717703	0.0334275	9922, 4641, 84033, 399687, 8826, 4627, 55827, 89910, 4628, 80179, 4649, 4643, 9690, 26012, 9657	1967	27	5942	1.67825	1	0.996294	45.5279
INTERPRO	IPR027417:P-loop containing nucleoside triphosphate hydrolase	134	6.41148	0.0376048	79705, 10890, 1108, 83871, 1106, 57674, 1107, 9927, 64398, 22904, 90990, 11325, 9657, 64121, 203, 4218, 84083, 204, 6009, 56919, 26153, 7284, 166378, 83858, 399687, 25837, 84893, 80179, 23064, 402, 1819, 8243, 9364, 7415, 1915, 1785, 10521, 4641, 11031, 20, 2771, 25902, 1267, 10801, 3799, 9231, 4173, 4172, 4175, 4174, 116988, 116987, 58477, 22907, 3835, 2778, 11021, 1778, 221092, 2794, 2781, 5768…	1967	354	5942	1.14348	1	0.997421	49.5843
INTERPRO	IPR003595:Protein-tyrosine phosphatase, catalytic	14	0.669856	0.0388267	1843, 5802, 5784, 5728, 5796, 5795, 5782, 25930, 5781, 5792, 8776, 64759, 8073, 5774	1967	25	5942	1.69167	1	0.997073	50.7159
INTERPRO	IPR013041:Coatomer/clathrin adaptor appendage, Ig-like subdomain	5	0.239234	0.0439914	161, 163, 160, 23062, 22820	1967	5	5942	3.02084	1	0.998157	55.2392
INTERPRO	IPR027401:Myosin-like IQ motif-containing domain	5	0.239234	0.0439914	399687, 8826, 4627, 4628, 26012	1967	5	5942	3.02084	1	0.998157	55.2392
INTERPRO	IPR000719:Protein kinase, catalytic domain	77	3.68421	0.0459083	5128, 5891, 2580, 1198, 79705, 23235, 1147, 5894, 2050, 5578, 9344, 26750, 340371, 7297, 156, 984, 10298, 84033, 50488, 8737, 5585, 4217, 5601, 29941, 166614, 6732, 415116, 5605, 5606, 30849, 26524, 5604, 5170, 25, 27, 207, 7443, 2261, 11183, 9113, 8986, 7204, 440275, 1459, 22853, 1455, 1956, 9261, 9263, 25778, 2931, 9578, 6793, 3984, 83983, 28996, 23012, 84197, 28951, 5563, 9020, 7046, 3654, 844…	1967	195	5942	1.19285	1	0.998096	56.816
INTERPRO	IPR018159:Spectrin/alpha-actinin	10	0.478469	0.047506	5339, 7402, 6712, 23224, 6711, 81, 7204, 87, 6709, 667	1967	16	5942	1.88803	1	0.997955	58.0899
INTERPRO	IPR011009:Protein kinase-like domain	84	4.01914	0.04792	5128, 5891, 2580, 1198, 79705, 23235, 1147, 5894, 2050, 5578, 9344, 26750, 340371, 7297, 156, 984, 2475, 10298, 84033, 50488, 8737, 55500, 5585, 4217, 29941, 5601, 166614, 6732, 415116, 5605, 56997, 5606, 30849, 26524, 5604, 5170, 25, 27, 207, 7443, 2261, 11183, 386593, 9113, 8986, 7204, 440275, 1459, 22853, 1455, 1956, 9261, 9263, 2931, 25778, 9578, 6793, 3984, 83983, 28996, 23012, 84197, 28951,…	1967	215	5942	1.18024	1	0.997461	58.4143
INTERPRO	IPR015940:Ubiquitin-associated/translation elongation factor EF1B, N-terminal, eukaryote	14	0.669856	0.054718	29978, 10075, 8078, 23235, 23387, 337867, 9113, 26524, 51271, 5887, 150094, 9898, 4077, 5886	1967	26	5942	1.62661	1	0.998588	63.412
INTERPRO	IPR002017:Spectrin repeat	9	0.430622	0.0550583	7402, 6712, 23224, 6711, 81, 7204, 87, 6709, 667	1967	14	5942	1.94197	1	0.998237	63.6466
INTERPRO	IPR023780:Chromo domain	9	0.430622	0.0550583	23468, 57680, 1108, 6839, 10951, 1106, 1107, 55636, 23492	1967	14	5942	1.94197	1	0.998237	63.6466
INTERPRO	IPR003954:RNA recognition motif domain, eukaryote	9	0.430622	0.0550583	27316, 7307, 8233, 9584, 7073, 1153, 8761, 4691, 26986	1967	14	5942	1.94197	1	0.998237	63.6466
INTERPRO	IPR015943:WD40/YVTN repeat-like-containing domain	63	3.01435	0.0583622	7290, 55234, 55135, 55746, 22872, 197335, 23654, 9828, 64397, 10507, 1314, 10399, 22937, 54663, 27339, 93594, 6396, 55023, 55717, 11091, 51133, 8021, 29888, 64743, 30849, 5928, 56995, 5361, 23160, 79228, 57521, 23218, 54461, 26259, 8726, 23603, 55558, 23129, 5931, 9948, 51594, 7869, 14, 26100, 2976, 5822, 348995, 9128, 10113, 22898, 10681, 6272, 10512, 22911, 10552, 54014, 10607, 80344, 55827, 57…	1967	158	5942	1.20451	1	0.998457	65.8519
INTERPRO	IPR001452:Src homology-3 domain	37	1.77033	0.0633915	50649, 79729, 51678, 57513, 30011, 9414, 6709, 64398, 84033, 26578, 9853, 51517, 9231, 1445, 29763, 6455, 8874, 64787, 25, 27, 50618, 274, 1398, 1399, 7410, 128272, 23607, 10188, 54806, 23048, 50807, 7204, 4643, 5296, 9644, 23380, 56904	1967	87	5942	1.28473	1	0.998874	68.968
INTERPRO	IPR001680:WD40 repeat	51	2.44019	0.0689248	7290, 55234, 55135, 22872, 197335, 64397, 10399, 1314, 22937, 27339, 54663, 93594, 6396, 55023, 55717, 51133, 11091, 8021, 29888, 64743, 30849, 5928, 56995, 79228, 23160, 23218, 57521, 54461, 26259, 8726, 23603, 5931, 9948, 14, 26100, 2976, 5822, 348995, 9128, 10113, 22898, 10681, 22911, 10552, 54014, 10607, 55827, 80344, 54806, 7090, 65065	1967	126	5942	1.22272	1	0.999206	72.0855
INTERPRO	IPR000242:Protein-tyrosine phosphatase, receptor/non-receptor type	10	0.478469	0.0720232	5802, 5784, 5796, 5795, 5782, 25930, 5781, 5792, 8073, 5774	1967	17	5942	1.77697	1	0.999264	73.6995
INTERPRO	IPR003961:Fibronectin, type III	21	1.00478	0.0734488	3597, 5796, 23245, 5795, 22862, 2050, 6091, 1294, 1969, 5792, 55729, 3371, 64778, 3460, 3897, 84033, 5802, 3454, 79414, 3054, 4281	1967	45	5942	1.40973	1	0.999189	74.4121
INTERPRO	IPR013785:Aldolase-type TIM barrel	12	0.574163	0.0746766	6888, 57462, 210, 7167, 51292, 226, 56931, 1723, 64118, 5091, 3373, 3615	1967	22	5942	1.64773	1	0.999095	75.0112
INTERPRO	IPR017884:SANT domain	9	0.430622	0.0846073	9612, 9611, 6599, 57585, 9219, 114803, 9112, 91748, 6601	1967	15	5942	1.81251	1	0.999562	79.393
INTERPRO	IPR002553:Clathrin/coatomer adaptor, adaptin-like, N-terminal	5	0.239234	0.0976072	161, 163, 160, 8943, 22820	1967	6	5942	2.51737	1	0.999835	84.0403
INTERPRO	IPR006911:Armadillo repeat-containing domain	5	0.239234	0.0976072	114928, 100131755, 80823, 83787, 51566	1967	6	5942	2.51737	1	0.999835	84.0403
INTERPRO	IPR001107:Band 7 protein	5	0.239234	0.0976072	10613, 5245, 30968, 11331, 10211	1967	6	5942	2.51737	1	0.999835	84.0403
INTERPRO	IPR001487:Bromodomain	14	0.669856	0.0983238	6595, 158358, 55870, 6597, 4297, 23613, 54014, 11176, 6046, 1387, 55023, 9031, 7862, 10902	1967	28	5942	1.51042	1	0.999801	84.2652
KEGG_PATHWAY	hsa04510:Focal adhesion	51	2.44019	2.87369e-05	5894, 5578, 6464, 55742, 7791, 10298, 3675, 1729, 387, 1289, 572, 81, 87, 5601, 1282, 29780, 1284, 5604, 5170, 7408, 3693, 207, 3688, 7410, 3913, 3915, 3911, 71, 3912, 5879, 824, 3265, 1956, 2316, 2317, 1499, 4636, 7423, 103910, 85301, 5829, 9475, 5728, 3371, 858, 857, 1398, 5291, 1399, 7094, 5296	862	84	2286	1.61013	0.00795714	0.00795714	0.0379482
KEGG_PATHWAY	hsa05230:Central carbon metabolism in cancer	22	1.05263	0.0011551	3098, 3265, 5728, 5605, 5894, 1956, 5604, 5160, 3091, 5213, 207, 7157, 2261, 5211, 2475, 9123, 5291, 57103, 5315, 5214, 5296, 4609	862	32	2286	1.82323	0.274797	0.148412	1.51492
KEGG_PATHWAY	hsa05016:Huntington's disease	42	2.00957	0.00173783	5434, 4707, 4705, 4706, 7416, 4702, 4700, 10975, 10540, 1387, 7019, 1349, 1175, 1345, 516, 1173, 64764, 9377, 1340, 4716, 6648, 581, 4724, 4712, 4723, 1327, 4714, 7157, 4722, 522, 161, 163, 6389, 51164, 10476, 1213, 160, 4695, 5431, 3066, 5430, 7384	862	75	2286	1.4851	0.383401	0.14886	2.27108
KEGG_PATHWAY	hsa00190:Oxidative phosphorylation	28	1.33971	0.00424105	1352, 4707, 4705, 4706, 4702, 4700, 10975, 10632, 1349, 245973, 516, 1345, 10063, 9377, 1340, 4716, 4724, 4712, 4723, 1327, 4714, 4722, 522, 6389, 9114, 10476, 4695, 7384	862	47	2286	1.5799	0.693187	0.255751	5.45873
KEGG_PATHWAY	hsa04810:Regulation of actin cytoskeleton	44	2.10526	0.00525807	3265, 5894, 1956, 50649, 55740, 54434, 10298, 3984, 3675, 10297, 1729, 23191, 387, 4636, 23396, 103910, 81, 5829, 87, 9475, 8396, 5605, 8874, 5604, 23365, 324, 200576, 28964, 3693, 2261, 1398, 7430, 4478, 5291, 3688, 10552, 1399, 7410, 8826, 9138, 71, 10109, 5879, 5296	862	83	2286	1.40586	0.76906	0.254067	6.72614
KEGG_PATHWAY	hsa05012:Parkinson's disease	30	1.43541	0.0055313	4707, 4705, 4706, 7326, 7416, 4702, 4700, 27429, 10975, 2771, 1349, 516, 1345, 9377, 1340, 4716, 4724, 5566, 4712, 4723, 7317, 1327, 4714, 4722, 11315, 522, 6389, 10476, 4695, 7384	862	52	2286	1.52998	0.786041	0.226628	7.06396
KEGG_PATHWAY	hsa05100:Bacterial invasion of epithelial cells	22	1.05263	0.0057182	6464, 858, 1785, 857, 23176, 1499, 1398, 5291, 3688, 10552, 1399, 387, 10459, 1213, 23607, 71, 10109, 5879, 1495, 5829, 5296, 10801	862	35	2286	1.66695	0.796934	0.203674	7.29439
KEGG_PATHWAY	hsa01200:Carbon metabolism	28	1.33971	0.00628673	55902, 1743, 1373, 1431, 5160, 5634, 25796, 5213, 5211, 6888, 283871, 4967, 7167, 3030, 2597, 6472, 3098, 1892, 226, 2806, 5091, 2805, 5631, 6389, 5315, 5214, 3421, 2821	862	48	2286	1.54698	0.826786	0.196802	7.99208
KEGG_PATHWAY	hsa04932:Non-alcoholic fatty liver disease (NAFLD)	36	1.72249	0.00713082	4707, 4705, 4706, 2931, 4702, 4700, 10975, 22877, 5565, 5563, 1349, 10018, 1345, 5601, 4217, 9377, 1340, 4716, 581, 4724, 4712, 4723, 1327, 4714, 6256, 51094, 207, 4722, 5291, 6389, 468, 4695, 6720, 5879, 5296, 7384	862	66	2286	1.44653	0.863232	0.198325	9.01899
KEGG_PATHWAY	hsa01130:Biosynthesis of antibiotics	46	2.20096	0.00777183	55902, 1743, 4047, 1431, 5160, 219, 4598, 55276, 25796, 51005, 5634, 158, 5213, 5211, 6888, 283871, 4967, 7167, 3030, 2597, 6472, 203, 3098, 204, 1892, 5051, 6713, 226, 2806, 134147, 5198, 2805, 5631, 6389, 3939, 5471, 4830, 10606, 471, 4832, 875, 5315, 5214, 3421, 2821, 4953	862	89	2286	1.37068	0.885709	0.19499	9.79175
KEGG_PATHWAY	hsa04976:Bile secretion	13	0.62201	0.0116989	6522, 10998, 3949, 57835, 112, 109, 113, 2052, 5566, 476, 6256, 2778, 949	862	18	2286	1.91531	0.962049	0.257257	14.395
KEGG_PATHWAY	hsa04144:Endocytosis	63	3.01435	0.0185305	10890, 9922, 5371, 156, 3482, 9101, 387, 9798, 3106, 3105, 7251, 3305, 4218, 6455, 112936, 274, 2261, 161, 409, 8729, 26119, 163, 375, 8724, 160, 5878, 10109, 64750, 3265, 9266, 1956, 118813, 1785, 30011, 11031, 3949, 10564, 23396, 30844, 51510, 7046, 1175, 1173, 3799, 23111, 2348, 116988, 116987, 116985, 27243, 858, 857, 28964, 2870, 11021, 10552, 84313, 10938, 1213, 56288, 50807, 29924, 56904	862	133	2286	1.2562	0.994482	0.351645	21.8892
KEGG_PATHWAY	hsa00030:Pentose phosphate pathway	10	0.478469	0.020872	5631, 6888, 226, 55276, 5634, 25796, 5214, 5213, 2821, 5211	862	13	2286	2.03998	0.99716	0.36305	24.315
KEGG_PATHWAY	hsa00051:Fructose and mannose metabolism	11	0.526316	0.0213806	55556, 3098, 7167, 57103, 5209, 226, 5373, 5214, 6652, 5213, 5211	862	15	2286	1.94478	0.997542	0.348946	24.8326
KEGG_PATHWAY	hsa04530:Tight junction	28	1.33971	0.0239648	5872, 3265, 1459, 5578, 9414, 64398, 1499, 2771, 9218, 5515, 387, 5518, 4636, 103910, 1460, 81, 8189, 87, 5728, 55870, 207, 4627, 4628, 2037, 71, 56288, 11336, 1495	862	52	2286	1.42799	0.998821	0.362089	27.4123
KEGG_PATHWAY	hsa04910:Insulin signaling pathway	34	1.62679	0.0328097	3265, 5257, 5256, 5894, 6464, 2475, 5565, 5563, 572, 3636, 2997, 5601, 3098, 5605, 6009, 5792, 5604, 90673, 5566, 5170, 57521, 207, 10211, 1398, 5291, 1399, 7248, 5834, 5576, 6720, 808, 5509, 6194, 5296	862	67	2286	1.34578	0.999906	0.439895	35.6356
KEGG_PATHWAY	hsa00310:Lysine degradation	19	0.909091	0.0349443	1892, 1743, 55870, 6839, 23067, 219, 7468, 84444, 9757, 9739, 80854, 4297, 8085, 387893, 4967, 3030, 29072, 8985, 64324	862	33	2286	1.52689	0.999949	0.441033	37.4868
KEGG_PATHWAY	hsa05020:Prion diseases	7	0.334928	0.0365707	10963, 5605, 3915, 581, 5604, 5566, 5621	862	8	2286	2.32048	0.999968	0.437521	38.864
KEGG_PATHWAY	hsa04961:Endocrine and other factor-regulated calcium reabsorption	12	0.574163	0.0365873	161, 163, 112, 5578, 1213, 160, 5566, 476, 1785, 2778, 1175, 1173	862	18	2286	1.76798	0.999968	0.420372	38.8779
KEGG_PATHWAY	hsa05416:Viral myocarditis	10	0.478469	0.0391811	1982, 1981, 3106, 71, 857, 25, 8672, 27, 5879, 3105	862	14	2286	1.89427	0.999985	0.426257	41.016
KEGG_PATHWAY	hsa04670:Leukocyte transendothelial migration	22	1.05263	0.0516255	5781, 5578, 7408, 1499, 5291, 4478, 2771, 7430, 3688, 7410, 387, 4636, 103910, 71, 81, 5879, 87, 1495, 5829, 6494, 5296, 9475	862	41	2286	1.42301	1	0.504256	50.3458
KEGG_PATHWAY	hsa03013:RNA transport	44	2.10526	0.0524411	23636, 9513, 55746, 10248, 23511, 22794, 8761, 1915, 7329, 8672, 4928, 23191, 348995, 10921, 1975, 6396, 6613, 8021, 23225, 5905, 3837, 8563, 100101267, 8661, 79228, 8667, 57122, 8666, 8087, 5901, 22985, 8665, 8664, 5903, 1982, 1983, 1981, 7175, 22916, 10605, 728689, 7919, 26986, 11260	862	93	2286	1.2547	1	0.493724	50.9068
KEGG_PATHWAY	hsa05010:Alzheimer's disease	31	1.48325	0.0525505	824, 4707, 4705, 4706, 4702, 4700, 10975, 488, 2597, 1349, 572, 1345, 516, 9377, 1340, 4716, 3710, 55851, 4724, 4712, 4723, 1327, 4714, 4722, 351, 522, 6389, 10476, 4695, 808, 7384	862	62	2286	1.32599	1	0.479244	50.9817
KEGG_PATHWAY	hsa05130:Pathogenic Escherichia coli infection	15	0.717703	0.0674414	7280, 5578, 25, 10376, 1499, 7430, 3688, 10381, 10552, 387, 203068, 71, 4691, 10109, 9475	862	26	2286	1.52998	1	0.554602	60.236
KEGG_PATHWAY	hsa04145:Phagosome	23	1.10048	0.0800187	7280, 10952, 200576, 949, 3693, 821, 1778, 10376, 9902, 3688, 10381, 9114, 3916, 203068, 51143, 3106, 71, 245973, 5878, 5879, 29927, 3105, 4074	862	45	2286	1.35545	1	0.604431	66.7645
KEGG_PATHWAY	hsa05205:Proteoglycans in cancer	42	2.00957	0.0855909	7023, 3265, 5781, 967, 5894, 5578, 1956, 3339, 2316, 2317, 2475, 1499, 387, 1975, 5829, 9475, 5605, 3710, 5604, 3091, 23365, 5566, 5170, 858, 857, 3693, 207, 7157, 7480, 7430, 4478, 5291, 3688, 8826, 9138, 1655, 71, 7078, 5879, 4609, 6194, 5296	862	91	2286	1.22399	1	0.615848	69.3271
KEGG_PATHWAY	hsa05206:MicroRNAs in cancer	35	1.67464	0.085956	3265, 5894, 5578, 1956, 6464, 100532731, 7329, 1786, 2475, 10298, 10297, 387, 1387, 6541, 23405, 3190, 10018, 5728, 599, 5605, 4363, 5604, 3371, 324, 25, 57521, 7157, 2261, 7431, 1398, 7430, 994, 1399, 7078, 4609	862	74	2286	1.25431	1	0.603626	69.4885
KEGG_PATHWAY	hsa04721:Synaptic vesicle cycle	12	0.574163	0.0862166	161, 163, 9114, 8775, 1213, 160, 6844, 1785, 245973, 1175, 1173, 5864	862	20	2286	1.59118	1	0.591465	69.6032
KEGG_PATHWAY	hsa05414:Dilated cardiomyopathy	12	0.574163	0.0862166	7169, 3688, 3675, 112, 109, 113, 5566, 2010, 71, 2778, 3693, 4000	862	20	2286	1.59118	1	0.591465	69.6032
KEGG_PATHWAY	hsa01230:Biosynthesis of amino acids	19	0.909091	0.0872939	1373, 1431, 226, 2806, 5634, 5213, 5091, 5211, 2805, 6888, 5631, 5832, 7167, 2597, 875, 6472, 5315, 5214, 3421	862	36	2286	1.39965	1	0.583395	70.0731
KEGG_PATHWAY	hsa04062:Chemokine signaling pathway	27	1.29187	0.0899894	3265, 112, 1147, 113, 5894, 6464, 2787, 2931, 156, 2771, 387, 109, 5829, 9475, 5604, 5566, 10681, 2870, 207, 409, 1398, 5291, 7410, 1399, 56288, 5879, 5296	862	55	2286	1.30188	1	0.582653	71.2196
SMART	SM00033:CH	21	1.00478	0.00073999	57553, 8407, 6712, 29780, 23224, 6711, 8874, 55742, 2316, 2317, 85377, 667, 5339, 7402, 7410, 8826, 89797, 79778, 81, 9645, 87	1114	32	3309	1.94931	0.318498	0.318498	1.06559
SMART	SM00360:RRM	52	2.48804	0.00643907	155435, 125950, 10921, 1975, 27336, 3191, 1153, 80004, 29890, 29896, 55696, 26528, 4841, 23067, 10236, 6294, 9739, 7307, 3187, 7073, 9584, 3183, 5937, 7936, 10146, 5936, 5935, 3181, 4691, 26986, 54439, 9987, 8761, 8106, 8241, 27316, 23013, 3178, 54502, 2521, 57466, 10772, 9991, 6434, 55147, 79171, 8666, 22913, 10644, 22916, 7458, 6428	1114	113	3309	1.3669	0.964783	0.812338	8.92507
SMART	SM00249:PHD	31	1.48325	0.010755	4302, 5253, 8242, 1108, 1107, 22992, 23613, 23469, 11176, 55274, 6942, 26147, 23133, 84289, 5927, 55870, 7468, 9757, 51230, 54620, 4297, 8085, 57649, 10743, 51317, 9767, 57661, 9031, 23338, 64324, 7862	1114	62	3309	1.48519	0.996307	0.845427	14.486
SMART	SM00508:PostSET	9	0.430622	0.0196777	6839, 23067, 29072, 7468, 9739, 9757, 64324, 4297, 8085	1114	12	3309	2.22778	0.999966	0.923744	24.9949
SMART	SM00298:CHROMO	12	0.574163	0.0254323	23468, 57680, 6599, 1108, 6839, 10951, 1106, 1107, 6601, 84148, 55636, 23492	1114	19	3309	1.87603	0.999998	0.93067	31.1209
SMART	SM00404:PTPc_motif	14	0.669856	0.0439437	1843, 5802, 5784, 5728, 5796, 5795, 5782, 25930, 5781, 5792, 8776, 64759, 8073, 5774	1114	25	3309	1.66341	1	0.979343	47.8137
SMART	SM00150:SPEC	10	0.478469	0.0523678	5339, 7402, 6712, 23224, 6711, 81, 7204, 87, 6709, 667	1114	16	3309	1.85649	1	0.981321	54.0875
SMART	SM00361:RRM_1	9	0.430622	0.0601866	27316, 7307, 8233, 9584, 7073, 1153, 8761, 4691, 26986	1114	14	3309	1.90953	1	0.982034	59.2753
SMART	SM00220:S_TKc	65	3.11005	0.063447	5128, 2580, 5891, 1198, 79705, 23235, 1147, 5894, 5578, 9344, 26750, 340371, 156, 984, 10298, 84033, 50488, 8737, 5585, 4217, 5601, 29941, 166614, 6732, 415116, 5605, 5606, 30849, 26524, 5604, 5170, 207, 7443, 11183, 9113, 8986, 7204, 440275, 1459, 1455, 9261, 9263, 25778, 2931, 9578, 6793, 83983, 28996, 23012, 28951, 5563, 9020, 7046, 3654, 8445, 10114, 9475, 9891, 657, 23387, 5566, 2870, 65125,…	1114	162	3309	1.19182	1	0.977011	61.2728
SMART	SM00320:WD40	51	2.44019	0.0763758	7290, 55234, 55135, 22872, 197335, 64397, 10399, 1314, 22937, 27339, 54663, 93594, 6396, 55023, 55717, 51133, 11091, 8021, 29888, 64743, 30849, 5928, 56995, 79228, 23160, 23218, 57521, 54461, 26259, 8726, 23603, 5931, 9948, 14, 26100, 2976, 5822, 348995, 9128, 10113, 22898, 10681, 22911, 10552, 54014, 10607, 55827, 80344, 54806, 7090, 65065	1114	125	3309	1.21191	1	0.983682	68.33
SMART	SM00015:IQ	10	0.478469	0.0789445	84033, 399687, 8826, 4627, 89910, 4628, 4649, 9690, 4641, 9657	1114	17	3309	1.74728	1	0.979194	69.5811
SMART	SM00185:ARM	9	0.430622	0.0919683	163, 10297, 3837, 93436, 324, 8502, 3728, 79798, 1499	1114	15	3309	1.78223	1	0.984463	75.2465
SMART	SM00326:SH3	35	1.67464	0.0957542	50649, 79729, 51678, 57513, 30011, 6709, 64398, 26578, 9853, 51517, 9231, 1445, 29763, 6455, 8874, 64787, 25, 27, 274, 50618, 1398, 1399, 7410, 128272, 23607, 10188, 54806, 23048, 50807, 7204, 4643, 5296, 9644, 23380, 56904	1114	83	3309	1.25257	1	0.981879	76.6988
UP_KEYWORDS	Phosphoprotein	1418	67.8469	2.66993e-25	55233, 10998, 23654, 3476, 340371, 54108, 5371, 25796, 23650, 949, 334, 221937, 3482, 6867, 1822, 25792, 8737, 3486, 6497, 6494, 8021, 84289, 166614, 84083, 8407, 6091, 23647, 55226, 63935, 50618, 3297, 7337, 8729, 29903, 3491, 7342, 8726, 7343, 738, 8724, 84895, 84893, 10728, 80727, 55920, 8243, 23636, 84294, 8242, 23637, 51493, 51491, 8030, 7329, 22919, 25777, 8761, 8241, 1843, 2975, 6888, 2976…	2048	3785	6290	1.15062	1.35899e-22	1.35899e-22	3.85445e-22
UP_KEYWORDS	Acetylation	739	35.3589	2.01252e-18	55233, 55234, 23511, 10890, 29127, 10892, 3476, 5373, 54108, 25796, 158, 5371, 221937, 10616, 55379, 1729, 3482, 10613, 6867, 1822, 2010, 11091, 8021, 8216, 84289, 203, 204, 8407, 55226, 8874, 1327, 207, 79711, 3297, 163, 51164, 8726, 738, 7343, 8724, 6778, 5214, 7203, 10728, 8209, 23788, 824, 8243, 55920, 23636, 5253, 692312, 399818, 55119, 51491, 8030, 51292, 5257, 1431, 219, 7326, 8106, 22919,…	2048	1818	6290	1.24845	1.02437e-15	5.12185e-16	2.90538e-15
UP_KEYWORDS	Isopeptide bond	260	12.4402	1.68001e-07	4798, 64397, 5371, 158, 124245, 7169, 1729, 7167, 25792, 6613, 605, 84083, 58499, 3091, 207, 3297, 55651, 4791, 6601, 402, 7203, 403341, 7227, 84298, 124808, 26205, 138151, 2316, 2317, 7329, 2975, 1460, 7046, 23392, 4092, 90933, 23111, 9994, 3837, 55870, 226, 5345, 7316, 10210, 10743, 22913, 203068, 808, 9188, 988, 6599, 10951, 57584, 10381, 4967, 55274, 8364, 4152, 26036, 81, 8502, 10657, 8367, …	2048	618	6290	1.29213	8.55088e-05	2.85038e-05	0.000242535
UP_KEYWORDS	Methylation	220	10.5263	5.63783e-07	55746, 1314, 221937, 3482, 7167, 1822, 7164, 11325, 84289, 4218, 58499, 8407, 1982, 1981, 8726, 7175, 8724, 6602, 23787, 51593, 8030, 1431, 9987, 8761, 8106, 4641, 8241, 23013, 2597, 23396, 4782, 114299, 23524, 51586, 65265, 159013, 23387, 10490, 9898, 221092, 5339, 10075, 10498, 57605, 1059, 22916, 10605, 203068, 10594, 4628, 808, 10749, 23380, 2580, 6599, 57584, 7791, 10652, 2109, 54663, 115817…	2048	516	6290	1.30946	0.000286925	7.17389e-05	0.000813905
UP_KEYWORDS	Ubl conjugation	352	16.8421	8.68106e-07	4798, 64397, 3476, 5371, 158, 124245, 10616, 7169, 7167, 25792, 8737, 6613, 605, 4217, 58499, 55223, 6091, 3091, 25, 27, 207, 3297, 409, 55556, 26001, 55658, 8724, 55651, 84893, 4791, 6601, 402, 7203, 1495, 4609, 1819, 403341, 7227, 84298, 124808, 26205, 22794, 138151, 2316, 2317, 7329, 16, 821, 2975, 3949, 387893, 23295, 2597, 1460, 23392, 7046, 8445, 4092, 90933, 23111, 9891, 51586, 226, 221927…	2048	885	6290	1.22157	0.000441768	8.83693e-05	0.00125324
UP_KEYWORDS	Coiled coil	500	23.9234	5.10231e-06	29127, 54108, 5371, 23650, 156, 334, 10616, 55379, 1729, 6867, 1822, 25792, 22900, 6497, 6494, 8021, 58499, 55223, 79714, 8874, 5361, 57215, 158234, 50618, 80829, 29903, 51164, 738, 7204, 23636, 5253, 8243, 23637, 692312, 55119, 8030, 25777, 8106, 25778, 387893, 90933, 23524, 8233, 64599, 5245, 324, 129804, 79836, 80851, 5339, 10075, 1831, 22911, 22913, 10608, 55929, 10607, 203068, 10749, 6595, 9…	2048	1325	6290	1.15898	0.00259371	0.000432753	0.00736571
UP_KEYWORDS	Nucleotide-binding	302	14.4498	8.1784e-06	10998, 10999, 1198, 79705, 10890, 57205, 5634, 156, 8737, 11325, 4217, 4218, 84083, 3098, 203, 166614, 204, 55226, 56919, 25, 27, 207, 1983, 84681, 3491, 10477, 84893, 402, 7203, 5214, 7204, 440275, 1819, 8243, 51493, 1459, 1455, 7326, 7329, 16, 25778, 7328, 4641, 20, 23012, 25902, 84197, 23396, 7046, 8445, 83732, 9891, 1445, 23387, 58477, 3735, 7317, 22907, 3835, 10079, 7319, 65125, 5631, 2963, …	2048	761	6290	1.21883	0.00415417	0.000594512	0.0118061
UP_KEYWORDS	Chromatin regulator	89	4.25837	8.83585e-06	7290, 165918, 200424, 6599, 3720, 57634, 6598, 6597, 1108, 10856, 23378, 1106, 284058, 9555, 1107, 26122, 29855, 84148, 10927, 5585, 23133, 86, 10445, 56254, 11091, 3054, 84289, 9611, 5927, 5928, 6839, 2908, 23067, 64061, 84444, 5925, 9739, 51230, 4297, 63035, 8726, 29072, 9960, 6015, 6602, 23028, 6601, 64324, 9643, 5931, 5253, 8242, 114803, 100532731, 55257, 10362, 22992, 1786, 387893, 114049, 1…	2048	184	6290	1.48557	0.00448737	0.000562025	0.0127551
UP_KEYWORDS	Cytoplasm	738	35.311	2.2856e-05	55234, 79705, 10892, 29127, 3476, 5373, 340371, 1314, 51371, 25796, 5371, 23650, 10899, 156, 1728, 1729, 6867, 1822, 8737, 22900, 6494, 166614, 203, 8409, 55223, 8874, 57217, 57215, 207, 79711, 3297, 50618, 7337, 409, 8729, 51164, 10625, 80823, 6778, 402, 5214, 7203, 10728, 7204, 1819, 824, 55920, 23636, 399818, 51493, 23637, 8030, 8106, 22919, 8761, 7329, 25778, 6888, 8239, 6472, 8445, 6477, 848…	2048	2045	6290	1.10837	0.0115664	0.00129181	0.0329911
UP_KEYWORDS	ATP-binding	243	11.6268	2.53706e-05	10998, 1198, 79705, 57205, 5634, 156, 8737, 11325, 4217, 84083, 3098, 203, 166614, 204, 56919, 55226, 25, 27, 207, 10477, 84893, 7203, 5214, 7204, 440275, 8243, 51493, 1459, 1455, 7326, 7329, 16, 25778, 7328, 4641, 20, 23012, 25902, 84197, 23396, 7046, 8445, 83732, 9891, 1445, 23387, 3735, 22907, 7317, 3835, 10079, 65125, 7319, 5631, 2963, 908, 10606, 4627, 7322, 150094, 4628, 10749, 9188, 81570,…	2048	604	6290	1.23563	0.0128308	0.00129054	0.03662
UP_KEYWORDS	Host-virus interaction	92	4.40191	7.04477e-05	5434, 6598, 6464, 7706, 3875, 10399, 7791, 29855, 8678, 5371, 8672, 949, 5685, 23557, 4928, 23468, 2192, 10616, 6830, 90480, 23373, 387, 1387, 6418, 3106, 29890, 6921, 3190, 5886, 3105, 3054, 7251, 4217, 6732, 6839, 64784, 581, 5690, 23471, 5925, 5692, 6256, 3693, 274, 7337, 8729, 23264, 3688, 1981, 10625, 1654, 8451, 3916, 6449, 23063, 55690, 440275, 27044, 23636, 55729, 7329, 7416, 3949, 23352,…	2048	200	6290	1.41279	0.0352238	0.00325462	0.101654
UP_KEYWORDS	Kinase	130	6.2201	0.000506531	1198, 79705, 5164, 9344, 26750, 4598, 5634, 7297, 156, 10298, 10922, 8737, 4217, 8396, 166614, 3098, 203, 204, 415116, 56997, 5170, 200576, 25, 27, 207, 5832, 4830, 4832, 5214, 7204, 440275, 1459, 5257, 22853, 5256, 26993, 1455, 9807, 25778, 9578, 28996, 23012, 5565, 84197, 92597, 5563, 23396, 1460, 9020, 7046, 8445, 10114, 83732, 9891, 1445, 8566, 29763, 23387, 5566, 65125, 5631, 27102, 5576, 11…	2048	312	6290	1.2797	0.227319	0.0212615	0.728772
UP_KEYWORDS	Nucleus	798	38.1818	0.000936654	55234, 54108, 5371, 334, 221937, 6867, 1822, 25792, 22900, 6497, 146540, 6494, 8021, 84083, 84289, 8409, 55226, 63935, 3297, 7337, 29903, 8726, 7342, 7343, 84893, 374655, 23636, 8243, 55920, 51493, 8242, 84294, 51491, 84298, 138151, 25777, 7329, 8241, 2975, 1843, 2976, 7335, 6472, 8445, 6477, 8233, 8427, 221927, 7317, 7316, 10743, 10075, 1831, 2963, 22913, 55929, 22916, 988, 27161, 10951, 7592, 9…	2048	2276	6290	1.07684	0.379345	0.0360258	1.34373
UP_KEYWORDS	Transferase	262	12.5359	0.00128648	1198, 79705, 54108, 5634, 156, 8737, 6611, 4217, 3098, 203, 166614, 204, 55226, 152992, 25, 27, 158234, 207, 23509, 7337, 4507, 10477, 5214, 7204, 440275, 399818, 1459, 5257, 5256, 1455, 1431, 7326, 25778, 7328, 84885, 6888, 387893, 23012, 2597, 84197, 23396, 1460, 6472, 7046, 8445, 254531, 83732, 9891, 1445, 112483, 23387, 55870, 196483, 80854, 65125, 7319, 10075, 10498, 5631, 7322, 150094, 6483…	2048	692	6290	1.16283	0.480681	0.0457243	1.84126
UP_KEYWORDS	Electron transport	22	1.05263	0.00199677	51022, 4707, 4716, 4705, 4706, 4724, 4712, 4723, 4714, 7296, 4702, 112812, 3992, 4700, 10975, 4722, 79901, 2109, 6389, 4695, 56255, 7384	2048	37	6290	1.82617	0.638456	0.0655758	2.84429
UP_KEYWORDS	Alternative splicing	1342	64.2105	0.00233434	55233, 10998, 55234, 10999, 80742, 5373, 340371, 5371, 23650, 949, 90231, 334, 221937, 7355, 414919, 22904, 6867, 25792, 8737, 3486, 22900, 146540, 8021, 84289, 166614, 84083, 55223, 8407, 6091, 23647, 55226, 8733, 50618, 3297, 7337, 8729, 7342, 8726, 7343, 738, 8724, 84895, 84893, 8209, 10728, 80727, 84294, 8242, 23637, 51491, 51292, 5355, 25777, 8761, 7328, 25778, 310, 57222, 8241, 84885, 2975,…	2048	3963	6290	1.04004	0.695647	0.0716514	3.31763
UP_KEYWORDS	RNA-binding	138	6.60287	0.00236273	2091, 7538, 155435, 6165, 8672, 23277, 125950, 10921, 1975, 10922, 27336, 84206, 11325, 9444, 51010, 23067, 6294, 9739, 22985, 5036, 1981, 79159, 7073, 5937, 7936, 55651, 92609, 5936, 10146, 5935, 4691, 26986, 440275, 65083, 9987, 22794, 8761, 8106, 16, 10521, 8241, 27316, 23196, 23013, 25804, 104, 103, 1267, 4809, 23524, 8233, 9991, 8565, 8563, 22907, 22868, 8661, 8666, 8664, 10128, 22913, 25819…	2048	345	6290	1.22852	0.700024	0.0683766	3.35734
UP_KEYWORDS	Cell junction	85	4.06699	0.00275133	2580, 5782, 55742, 57584, 7791, 29855, 1861, 3728, 55740, 9414, 23557, 64398, 3675, 7402, 54914, 1627, 50488, 1822, 8502, 81, 3190, 87, 223082, 6645, 5796, 5795, 29780, 23224, 6455, 22883, 8874, 5170, 7408, 57120, 55591, 3688, 375, 84687, 10109, 1495, 4643, 9644, 9948, 5872, 25945, 64759, 6844, 1785, 25778, 9093, 9578, 30011, 22859, 134265, 1499, 667, 92140, 23191, 9218, 85302, 10564, 79414, 2339…	2048	200	6290	1.3053	0.753984	0.0749512	3.89938
UP_KEYWORDS	Actin-binding	48	2.29665	0.00355027	57553, 9948, 2316, 55742, 2317, 80306, 4641, 6709, 54434, 55740, 667, 7169, 7402, 1627, 23012, 1729, 23191, 9026, 2010, 81, 3636, 87, 6645, 6712, 29780, 23224, 6711, 133746, 7408, 23164, 5339, 10552, 57180, 4627, 29766, 84687, 2037, 4628, 83543, 4649, 80179, 9645, 64423, 10109, 4643, 23603, 142678, 23242	2048	103	6290	1.43128	0.836396	0.0908809	5.0049
UP_KEYWORDS	Cytoplasmic vesicle	74	3.54067	0.00520824	6721, 1198, 29952, 10890, 148022, 22872, 9342, 29127, 83871, 10548, 9344, 200734, 1314, 57584, 8678, 1861, 22937, 23557, 10959, 10652, 10447, 63894, 9798, 6396, 4077, 6645, 4218, 25930, 150684, 30849, 9779, 79856, 55754, 372, 1855, 2261, 409, 29801, 55591, 25837, 8724, 55704, 4643, 29978, 5872, 203547, 22994, 6844, 1785, 3460, 4641, 30011, 11031, 79065, 10945, 10564, 9026, 8907, 55667, 23392, 149…	2048	174	6290	1.30618	0.929906	0.124444	7.26141
UP_KEYWORDS	Disease mutation	319	15.2632	0.0059517	10999, 29123, 1476, 64093, 10892, 5373, 1314, 158, 3728, 5376, 7355, 10616, 7169, 7167, 25792, 80207, 1723, 2010, 23133, 6497, 2202, 8216, 3098, 203, 204, 57217, 9871, 207, 7480, 7337, 1717, 1981, 3913, 55651, 4791, 7078, 440275, 8243, 23636, 8242, 210, 5257, 5256, 7227, 51594, 9987, 2316, 2317, 8106, 16, 25778, 3949, 6888, 84197, 8239, 23396, 51293, 7046, 728294, 388962, 226, 3735, 7317, 324, 10…	2048	876	6290	1.11843	0.952092	0.134709	8.25697
UP_KEYWORDS	Motor protein	20	0.956938	0.00627928	26153, 63971, 3835, 1785, 1778, 4641, 3831, 399687, 90990, 4636, 4627, 103910, 51143, 4628, 10749, 4649, 80179, 64837, 4643, 3799	2048	35	6290	1.75502	0.959491	0.135616	8.69247
UP_KEYWORDS	Cell projection	109	5.21531	0.00658564	10890, 9342, 9344, 23516, 55740, 3675, 1627, 1729, 54997, 4218, 84747, 29780, 6091, 22883, 8874, 7408, 203286, 3688, 84687, 23064, 5935, 9644, 9364, 26146, 9368, 9572, 22994, 1785, 4641, 3897, 22859, 134265, 23191, 109, 8239, 23396, 23322, 23098, 286262, 1464, 5566, 324, 8751, 2778, 10280, 3831, 7430, 493, 10938, 23286, 4771, 4628, 83543, 4957, 79778, 54806, 112752, 23380, 5891, 353116, 5064, 578…	2048	272	6290	1.23077	0.965375	0.136037	9.098
UP_KEYWORDS	mRNA transport	31	1.48325	0.00660727	8888, 23636, 7538, 23511, 55746, 8570, 22794, 4641, 4928, 6830, 3178, 348995, 6396, 8021, 9444, 2733, 23225, 8563, 100101267, 79228, 57122, 5903, 10128, 23144, 7175, 10644, 22916, 6428, 9961, 3181, 7919	2048	62	6290	1.53564	0.965757	0.131158	9.12658
UP_KEYWORDS	Ribonucleoprotein	67	3.20574	0.0085801	7538, 2091, 27161, 6726, 11222, 26750, 6164, 6165, 6168, 28973, 2197, 3191, 3190, 6731, 23020, 55127, 55052, 64432, 10236, 6217, 6154, 6158, 5036, 60488, 3187, 57129, 3183, 55651, 9961, 8986, 29074, 79590, 6191, 3181, 84545, 6194, 6141, 10528, 26065, 9987, 100526842, 11100, 54433, 64969, 27316, 64968, 25804, 3178, 51258, 6139, 4809, 6173, 6136, 8233, 6137, 6134, 6628, 6135, 23521, 5094, 6235, 622…	2048	158	6290	1.30238	0.987551	0.160916	11.6975
UP_KEYWORDS	Cytoskeleton	184	8.80383	0.0109065	29127, 1108, 9344, 55742, 1107, 282991, 8924, 22974, 3728, 10899, 55740, 10540, 9857, 7169, 27339, 7402, 10297, 1729, 6867, 90990, 9657, 166614, 4218, 8409, 7280, 29780, 7283, 26153, 55755, 55856, 25, 7408, 27, 51164, 399687, 7175, 10625, 84687, 80179, 402, 9055, 1495, 201255, 23636, 57553, 55920, 9364, 23637, 8030, 26146, 2316, 2317, 22994, 22919, 1785, 55722, 81565, 2771, 23012, 2597, 145508, 2…	2048	490	6290	1.1533	0.996235	0.193207	14.6421
UP_KEYWORDS	Chromosome	73	3.49282	0.011074	3148, 55746, 3149, 284058, 3006, 9555, 84148, 387103, 11198, 23468, 8364, 4152, 5885, 8971, 10061, 8367, 84083, 8349, 3619, 6839, 23067, 100526739, 9739, 199990, 57122, 9918, 23219, 8726, 7175, 8350, 29072, 84893, 23063, 23064, 64324, 10051, 8243, 55920, 5253, 65083, 84298, 10362, 57659, 81565, 387893, 5515, 348995, 5518, 10274, 83695, 93973, 54069, 8379, 5905, 10849, 79172, 55870, 91603, 9933, 7…	2048	176	6290	1.27389	0.996546	0.189359	14.8505
UP_KEYWORDS	Leigh syndrome	6	0.287081	0.0159196	1352, 5428, 10128, 6389, 5160, 4723	2048	6	6290	3.07129	0.999716	0.253025	20.6794
UP_KEYWORDS	Redox-active center	13	0.62201	0.0172508	6415, 79001, 51061, 51022, 10587, 84817, 9601, 2923, 154807, 280636, 7296, 56255, 285362	2048	21	6290	1.90127	0.999858	0.263189	22.2145
UP_KEYWORDS	Serine/threonine-protein kinase	69	3.30144	0.0173031	5128, 2580, 5891, 1198, 79705, 23235, 1147, 5894, 5578, 9344, 26750, 156, 984, 2475, 10298, 84033, 50488, 8737, 10922, 5585, 4217, 5601, 29941, 166614, 6732, 415116, 5605, 5606, 30849, 26524, 5604, 5170, 207, 7443, 11183, 9113, 8986, 7204, 440275, 1459, 22853, 1455, 9261, 9263, 25778, 2931, 9578, 6793, 3984, 83983, 28996, 23012, 5563, 9020, 7046, 3654, 8445, 10114, 9475, 83732, 9891, 657, 23387, …	2048	168	6290	1.26142	0.999861	0.25632	22.2742
UP_KEYWORDS	Neurodegeneration	60	2.87081	0.0194391	22978, 79042, 10397, 9927, 5376, 4000, 1822, 10159, 90678, 3098, 1892, 51010, 5119, 56997, 6311, 6253, 10908, 7443, 5832, 1981, 6305, 23064, 64837, 2512, 29978, 8518, 10528, 80821, 10273, 118813, 7415, 16, 1785, 27429, 3897, 3035, 3178, 2521, 23111, 2348, 5428, 8565, 26058, 6712, 3735, 7317, 1778, 10280, 65125, 351, 3329, 11315, 25814, 5631, 80347, 54840, 9516, 10749, 64423, 51142	2048	144	6290	1.2797	0.999954	0.275534	24.6779
UP_KEYWORDS	mRNA processing	74	3.54067	0.0202833	988, 8570, 10291, 79042, 6830, 27339, 10921, 80004, 29890, 3190, 23070, 29896, 10657, 29894, 9444, 23020, 55696, 55796, 6732, 4841, 10236, 23450, 79228, 22985, 7307, 9589, 3187, 1653, 9584, 3183, 58506, 1655, 5936, 10147, 3181, 9785, 26986, 10421, 56949, 55119, 26993, 22794, 8106, 9092, 8241, 57805, 29101, 5511, 27316, 25804, 3178, 9128, 104, 103, 8189, 8996, 10772, 4809, 23524, 8233, 6433, 6628,…	2048	183	6290	1.24194	0.99997	0.278157	25.6087
UP_KEYWORDS	Charcot-Marie-Tooth disease	17	0.813397	0.0212319	3098, 8565, 3735, 7415, 1785, 16, 10397, 9927, 1778, 5376, 4000, 3035, 5631, 6305, 9516, 64423, 90678	2048	31	6290	1.68426	0.999982	0.281803	26.6417
UP_KEYWORDS	Respiratory chain	14	0.669856	0.0230658	4716, 4707, 4705, 4706, 4724, 4712, 4723, 4714, 4702, 10975, 4700, 4722, 4695, 7384	2048	24	6290	1.79159	0.999993	0.294856	28.6013
UP_KEYWORDS	Endocytosis	31	1.48325	0.0237582	4041, 8678, 85377, 1785, 30011, 9902, 54453, 3949, 9026, 23396, 1175, 1173, 26130, 29763, 6455, 79874, 25, 6272, 274, 50618, 351, 161, 26119, 5291, 51479, 163, 4830, 160, 10188, 23048, 29924	2048	67	6290	1.42104	0.999995	0.295088	29.3283
UP_KEYWORDS	Translocation	26	1.24402	0.0237705	8888, 23636, 23511, 55746, 10952, 10245, 27230, 4641, 6238, 4928, 348995, 10469, 64374, 6396, 8021, 2733, 23225, 100101267, 23471, 57122, 5903, 7175, 131118, 92609, 9961, 29927	2048	54	6290	1.47877	0.999995	0.288335	29.3413
UP_KEYWORDS	Helicase	37	1.77033	0.0244348	6595, 57634, 54555, 6597, 1108, 10856, 1106, 1107, 10521, 1662, 23405, 89797, 11325, 23020, 4173, 84083, 4172, 4175, 4174, 56919, 10847, 22907, 9401, 1653, 57680, 2963, 1654, 1655, 84893, 2547, 10146, 23064, 9188, 9785, 79039, 7919, 55636	2048	83	6290	1.36913	0.999997	0.288457	30.0322
UP_KEYWORDS	Protein transport	119	5.69378	0.0249002	55746, 23511, 10890, 9342, 22872, 83871, 8675, 1314, 8677, 55435, 4928, 11018, 63894, 54997, 8021, 4218, 84747, 9919, 10807, 112936, 100101267, 23471, 9871, 79711, 409, 161, 8729, 163, 7175, 25837, 738, 8724, 160, 92609, 11336, 23062, 23636, 6284, 9804, 54732, 51594, 10228, 8943, 4641, 10945, 55667, 51510, 10113, 3837, 116987, 10490, 11021, 9183, 79139, 84313, 10938, 152579, 353116, 10952, 10245,…	2048	312	6290	1.17142	0.999997	0.286629	30.5125
UP_KEYWORDS	Transport	246	11.7703	0.0270237	84275, 10999, 55746, 10890, 23511, 29127, 1317, 23516, 57205, 1314, 79901, 7355, 3482, 84679, 8021, 54997, 4218, 3710, 55754, 9871, 100101267, 55362, 207, 79711, 161, 409, 8729, 163, 7175, 738, 10476, 8724, 160, 92609, 11336, 23788, 80727, 23787, 23636, 51594, 10228, 22794, 57222, 4641, 20, 81565, 3949, 114879, 58485, 55667, 516, 3837, 10490, 25769, 9183, 522, 6389, 22916, 152579, 353116, 10952, …	2048	683	6290	1.1062	0.999999	0.30061	32.6655
UP_KEYWORDS	mRNA splicing	62	2.96651	0.0280077	988, 8570, 10291, 6830, 27339, 10921, 80004, 3190, 29890, 29896, 23020, 9444, 55696, 55796, 6732, 4841, 10236, 23450, 79228, 22985, 7307, 9589, 3187, 9584, 3183, 58506, 1655, 5936, 3181, 10147, 9785, 26986, 10421, 56949, 55119, 26993, 22794, 9092, 8241, 57805, 5511, 27316, 25804, 3178, 9128, 8996, 4809, 10772, 23524, 8233, 6433, 6628, 6434, 9991, 8563, 22913, 10286, 22916, 11129, 10594, 6428, 7919	2048	152	6290	1.25276	0.999999	0.303359	33.6419
UP_KEYWORDS	Basement membrane	9	0.430622	0.0298782	1282, 64093, 3913, 1284, 1294, 3915, 3339, 3911, 3912	2048	13	6290	2.12628	1	0.313797	35.4618
UP_KEYWORDS	Cell cycle	122	5.83732	0.0313518	29127, 3875, 1104, 8678, 22974, 10899, 10298, 387103, 10927, 6867, 27338, 23133, 10807, 415116, 79791, 11140, 79892, 9918, 83858, 7175, 51434, 23063, 402, 9055, 440275, 55920, 8243, 23637, 1459, 22994, 7329, 22919, 57805, 1843, 387893, 2771, 10274, 83461, 23326, 8239, 83695, 93973, 6477, 10801, 54069, 4173, 9994, 8379, 4172, 4175, 4174, 5621, 9183, 997, 994, 899, 150094, 2580, 988, 6598, 11190, 1…	2048	323	6290	1.16005	1	0.320255	36.8627
UP_KEYWORDS	Protease inhibitor	12	0.574163	0.0314018	7035, 1476, 5270, 1294, 7077, 7076, 57448, 5345, 1471, 7078, 334, 351	2048	20	6290	1.84277	1	0.314544	36.9097
UP_KEYWORDS	Neuropathy	24	1.14833	0.0319024	3098, 5428, 8565, 9342, 8518, 3735, 7415, 1785, 16, 1786, 10397, 1778, 9927, 5376, 4000, 667, 65125, 3035, 5631, 6305, 9516, 64837, 64423, 90678	2048	50	6290	1.47422	1	0.312757	37.3788
UP_KEYWORDS	Hydroxylation	16	0.76555	0.0350216	1282, 27161, 1284, 1294, 2034, 3091, 10491, 1952, 124401, 409, 6228, 203286, 51631, 1289, 80781, 5315	2048	30	6290	1.63802	1	0.331846	40.2294
UP_KEYWORDS	Cell adhesion	46	2.20096	0.0387541	25945, 5578, 1294, 55742, 7791, 3728, 3897, 667, 1499, 5802, 3675, 2195, 79414, 23396, 55714, 80781, 8502, 3636, 8189, 5829, 9891, 386724, 9993, 29780, 5792, 1969, 22883, 3371, 8751, 129804, 25, 3693, 27, 351, 5291, 3688, 3491, 51148, 3913, 3915, 4627, 4628, 3911, 3912, 1495, 5818	2048	110	6290	1.28436	1	0.354257	43.4817
UP_KEYWORDS	Allosteric enzyme	13	0.62201	0.0399378	22978, 790, 3098, 210, 5834, 1373, 5471, 875, 5315, 5214, 2997, 5213, 5211	2048	23	6290	1.73595	1	0.356859	44.4781
UP_KEYWORDS	Proteasome	15	0.717703	0.0410747	5708, 9097, 5705, 5710, 5690, 10213, 5692, 5685, 7337, 5687, 10197, 5887, 5886, 23392, 9690	2048	28	6290	1.64533	1	0.359023	45.4198
UP_KEYWORDS	Activator	114	5.45455	0.0414799	688, 2005, 8928, 5371, 84148, 22877, 221937, 22904, 1387, 27336, 23133, 7543, 10153, 84289, 9442, 8409, 23067, 6689, 3091, 5170, 9739, 3297, 7343, 5936, 4791, 6778, 64324, 4609, 440275, 5253, 51593, 114803, 9987, 9572, 55729, 1786, 57805, 27316, 23013, 6942, 4800, 23326, 4782, 10113, 7182, 9994, 51586, 112950, 55870, 80854, 5813, 10743, 57680, 55929, 23286, 2000, 6595, 6721, 7023, 988, 284358, 65…	2048	303	6290	1.15553	1	0.356011	45.7518
UP_KEYWORDS	Glycolysis	10	0.478469	0.0428854	3098, 4967, 7167, 226, 2597, 5315, 5214, 5213, 2821, 5211	2048	16	6290	1.91956	1	0.359951	46.8889
UP_KEYWORDS	SH3 domain	38	1.81818	0.0530313	50649, 79729, 51678, 57513, 30011, 9414, 6709, 667, 64398, 84033, 26578, 9853, 51517, 9231, 1445, 29763, 6455, 8874, 64787, 25, 27, 50618, 274, 1398, 1399, 7410, 128272, 23607, 10188, 54806, 23048, 50807, 7204, 4643, 5296, 9644, 23380, 56904	2048	90	6290	1.29677	1	0.419476	54.4626
UP_KEYWORDS	ER-Golgi transport	22	1.05263	0.0544176	9919, 5861, 22872, 51112, 1314, 372, 9871, 57222, 22878, 10959, 22820, 10652, 9183, 51614, 51128, 10945, 375, 8775, 6396, 58485, 10113, 6399	2048	47	6290	1.43762	1	0.421725	55.4156
UP_KEYWORDS	Protein biosynthesis	35	1.67464	0.0549431	1933, 6829, 6301, 2935, 1915, 7453, 16, 8672, 3035, 27335, 1975, 56478, 6921, 6924, 8565, 64146, 3735, 7284, 8661, 23367, 7407, 8667, 3692, 8666, 8665, 8664, 1982, 1983, 10767, 1981, 27102, 7458, 79921, 728689, 80755	2048	82	6290	1.31092	1	0.418829	55.772
UP_KEYWORDS	Mental retardation	52	2.48804	0.0621438	6595, 29123, 6598, 6597, 84100, 3476, 8924, 2475, 113246, 10159, 6611, 5885, 3190, 23133, 3054, 5605, 4841, 79791, 5604, 166378, 55755, 79228, 10908, 5832, 440, 1654, 24140, 89910, 29072, 71, 55690, 8243, 8242, 3897, 6709, 1499, 27315, 27316, 5518, 8239, 6628, 9524, 79738, 1778, 8085, 7319, 5813, 10075, 5631, 26137, 84919, 124512	2048	130	6290	1.22852	1	0.453792	60.3956
UP_KEYWORDS	Endosome	77	3.68421	0.0626181	10244, 10890, 23200, 8678, 85377, 5371, 55435, 63894, 9101, 90060, 51271, 5585, 7251, 84679, 223082, 4218, 25930, 10807, 150684, 5119, 30849, 9779, 6455, 112936, 63971, 200576, 90809, 56850, 3688, 51479, 11188, 738, 8724, 117584, 3916, 56928, 5878, 23062, 142678, 5872, 967, 1956, 118813, 25777, 8073, 11031, 79065, 3949, 20, 10016, 23295, 10564, 3454, 30844, 26994, 51510, 23392, 80762, 23250, 2348…	2048	201	6290	1.17656	1	0.450332	60.6837
UP_KEYWORDS	Initiation factor	16	0.76555	0.0638705	8661, 8672, 3692, 8667, 8666, 8665, 8664, 1982, 1983, 1981, 27335, 27102, 1975, 7458, 56478, 728689	2048	32	6290	1.53564	1	0.451137	61.4353
UP_KEYWORDS	Prenylation	31	1.48325	0.0643546	5872, 9364, 3265, 5064, 10890, 5257, 5256, 83871, 2787, 8073, 10294, 4000, 11031, 10652, 84988, 387, 1267, 84823, 114299, 54509, 5864, 4218, 53917, 5861, 6009, 3301, 4673, 11021, 25837, 5878, 5879	2048	72	6290	1.32236	1	0.447886	61.7222
UP_KEYWORDS	Epilepsy	22	1.05263	0.0679805	5428, 1476, 1106, 221927, 166378, 950, 158, 16, 55163, 6709, 488, 2475, 7355, 51604, 1729, 7248, 1822, 471, 10159, 150094, 84823, 81570	2048	48	6290	1.40767	1	0.460889	63.8088
UP_KEYWORDS	Ubiquinone	7	0.334928	0.0686042	4716, 4707, 4705, 4724, 4723, 4702, 4722	2048	10	6290	2.1499	1	0.458351	64.1569
UP_KEYWORDS	Magnesium	88	4.21053	0.0716848	22978, 9647, 79705, 112, 27161, 23235, 113, 9344, 23200, 84100, 57205, 64943, 55276, 5634, 57130, 488, 84033, 387, 23405, 4217, 81889, 6009, 5605, 26524, 27032, 476, 25, 3612, 27, 55556, 3688, 51128, 9113, 4830, 4832, 8986, 5315, 5214, 29883, 11044, 10423, 3607, 9578, 121642, 5213, 5211, 5511, 2771, 83983, 23012, 283871, 54974, 109, 5563, 132160, 7046, 3654, 8445, 23250, 9475, 83732, 9891, 1445, …	2048	234	6290	1.15501	1	0.467953	65.8308
UP_KEYWORDS	Angiogenesis	23	1.10048	0.0727904	1282, 1284, 2050, 5578, 1969, 6464, 1464, 2034, 55742, 57674, 3339, 8751, 7453, 14, 1942, 10016, 7410, 10553, 8829, 51129, 116150, 2821, 23129	2048	51	6290	1.38509	1	0.46774	66.4137
UP_KEYWORDS	Biological rhythms	30	1.43541	0.0730604	8242, 9572, 10399, 5371, 57805, 23373, 5563, 4800, 1387, 9475, 5601, 4862, 4841, 5927, 6839, 3397, 3398, 4297, 7157, 7337, 10743, 25819, 55366, 468, 9112, 1655, 150094, 3066, 4791, 23064	2048	70	6290	1.31627	1	0.463582	66.5545
UP_KEYWORDS	Myosin	9	0.430622	0.0775544	399687, 4636, 4627, 103910, 4628, 4649, 80179, 4641, 4643	2048	15	6290	1.84277	1	0.479113	68.8207
UP_KEYWORDS	Microphthalmia	6	0.287081	0.0799627	8260, 64093, 3149, 8724, 3052, 55714	2048	8	6290	2.30347	1	0.484605	69.9755
UP_KEYWORDS	Proto-oncogene	42	2.00957	0.0815823	4302, 3265, 865, 8030, 22872, 5894, 5578, 1956, 100532731, 57674, 5371, 387, 6418, 6497, 51517, 55717, 2521, 8021, 64764, 4218, 415116, 9935, 6455, 11214, 5245, 23365, 7468, 2778, 25, 4297, 207, 4299, 1398, 7913, 7175, 4791, 9516, 2114, 64324, 4609, 8178, 2000	2048	104	6290	1.24033	1	0.486457	70.7296
UP_KEYWORDS	Guanine-nucleotide releasing factor	25	1.19617	0.0818143	9266, 50649, 9828, 9922, 1104, 23370, 10564, 55667, 5866, 22898, 26130, 8874, 11214, 23365, 55103, 29, 84315, 8729, 7410, 160518, 9138, 6305, 128272, 55701, 7204	2048	57	6290	1.34706	1	0.482255	70.8361
UP_KEYWORDS	Carbohydrate metabolism	16	0.76555	0.082984	5164, 5257, 5256, 90673, 5160, 55276, 51005, 2931, 207, 23509, 5504, 283871, 5834, 9469, 10825, 5509	2048	33	6290	1.48911	1	0.482182	71.3679
UP_KEYWORDS	Endoplasmic reticulum	151	7.22488	0.0842425	26086, 79001, 10998, 10999, 4041, 4047, 10890, 22872, 57205, 51371, 8678, 5371, 488, 51009, 79888, 11018, 55379, 10613, 6418, 4217, 8396, 9919, 6009, 10330, 3710, 22883, 55851, 23646, 8733, 100101267, 23471, 9871, 10908, 23509, 1717, 23478, 116150, 56926, 10525, 10423, 54732, 51594, 79022, 7415, 57222, 821, 6185, 10523, 55161, 27315, 92140, 10016, 23197, 51614, 10945, 114879, 9218, 84197, 58485, …	2048	420	6290	1.1042	1	0.482493	71.93
UP_KEYWORDS	Glycogen storage disease	5	0.239234	0.0924201	3939, 5257, 5256, 226, 5213	2048	6	6290	2.55941	1	0.510982	75.3394
UP_KEYWORDS	WD repeat	51	2.44019	0.0988653	7290, 55234, 55135, 22872, 197335, 64397, 10399, 1314, 22937, 27339, 54663, 93594, 6396, 55023, 55717, 51133, 11091, 29888, 64743, 30849, 5928, 56995, 79228, 23160, 23218, 57521, 54461, 26259, 8726, 23603, 5931, 9948, 51594, 14, 26100, 2976, 5822, 348995, 9128, 10113, 22898, 10681, 22911, 10552, 54014, 10607, 55827, 80344, 54806, 7090, 65065	2048	131	6290	1.19569	1	0.53091	77.7505
UP_SEQ_FEATURE	compositionally biased region:Poly-Glu	98	4.689	0.00106361	9647, 9240, 1108, 22870, 9344, 10291, 25963, 1107, 334, 4928, 22904, 1387, 55023, 11325, 26155, 9919, 3550, 400818, 1981, 57661, 7175, 80823, 6601, 374655, 57553, 10525, 56987, 124808, 10425, 14, 23199, 8241, 100132406, 134265, 5822, 7726, 6949, 8233, 5428, 286262, 57142, 64599, 83746, 84726, 22907, 80851, 7916, 493, 58525, 9031, 64342, 23381, 5818, 6595, 5784, 83444, 57634, 6597, 23378, 9828, 85…	2029	229	6215	1.31084	0.995127	0.995127	2.00495
UP_SEQ_FEATURE	lipid moiety-binding region:S-farnesyl cysteine	16	0.76555	0.00250617	9364, 3265, 5064, 6009, 5257, 3301, 5256, 4673, 8073, 10294, 4000, 10652, 84988, 445815, 84823, 114299	2029	24	6215	2.04206	0.999996	0.998121	4.66343
UP_SEQ_FEATURE	domain:CH 2	12	0.574163	0.00330635	5339, 7402, 6712, 29780, 23224, 6711, 2316, 55742, 2317, 81, 87, 667	2029	16	6215	2.29731	1	0.996006	6.10848
UP_SEQ_FEATURE	domain:CH 1	12	0.574163	0.00330635	5339, 7402, 6712, 29780, 23224, 6711, 2316, 55742, 2317, 81, 87, 667	2029	16	6215	2.29731	1	0.996006	6.10848
UP_SEQ_FEATURE	compositionally biased region:Poly-Pro	79	3.7799	0.00366311	2580, 5784, 6599, 57634, 29998, 1108, 10291, 9828, 1107, 143458, 22937, 54453, 5638, 54856, 1822, 10922, 1387, 89797, 3190, 79581, 9612, 9611, 63977, 2801, 4841, 79791, 30849, 64784, 6311, 5925, 25, 4297, 27, 4299, 402483, 3954, 83858, 9112, 84687, 23028, 10051, 10525, 441381, 3609, 9880, 22853, 8030, 23054, 22794, 9261, 60509, 118813, 9263, 10521, 22859, 5802, 6942, 6046, 6944, 51293, 4092, 5746…	2029	185	6215	1.30802	1	0.989848	6.74602
UP_SEQ_FEATURE	nucleotide phosphate-binding region:ATP	160	7.6555	0.00663841	1198, 79705, 5164, 1108, 9344, 26750, 1106, 4598, 57205, 1107, 5634, 7297, 156, 10298, 90990, 8737, 11325, 4217, 203, 166614, 84083, 204, 415116, 56919, 55226, 26153, 5170, 25, 207, 27, 399687, 83858, 23064, 5214, 7204, 440275, 8243, 1459, 22853, 6301, 1455, 7415, 25778, 10521, 9578, 4641, 23012, 28996, 25902, 5563, 9778, 9020, 7046, 10114, 8445, 3799, 9891, 4173, 1445, 4172, 8566, 4175, 4174, 23…	2029	415	6215	1.18095	1	0.998725	11.9057
UP_SEQ_FEATURE	metal ion-binding site:Magnesium	24	1.14833	0.00758323	22978, 6009, 58478, 23200, 27032, 57205, 84100, 55276, 64943, 476, 5634, 57130, 10079, 488, 55556, 5631, 493, 51128, 5471, 11165, 58190, 5315, 23250, 10106	2029	45	6215	1.63365	1	0.998248	13.4867
UP_SEQ_FEATURE	cross-link:Glycyl lysine isopeptide (Lys-Gly) (interchain with G-Cter in ubiquitin)	48	2.29665	0.0110122	54439, 1956, 3006, 7329, 6185, 667, 488, 54856, 6520, 1729, 4967, 6418, 84629, 5886, 3190, 8502, 81, 55624, 23111, 9994, 84083, 6134, 8349, 580, 3837, 84726, 5928, 55870, 2908, 3091, 7316, 2778, 4297, 5901, 7157, 22985, 10376, 5687, 8350, 4830, 8451, 203068, 808, 4791, 402, 8334, 7009, 5931	2029	108	6215	1.36137	1	0.999634	19.0018
UP_SEQ_FEATURE	active site:4-aspartylphosphate intermediate	11	0.526316	0.0134863	493, 23200, 27032, 58190, 57205, 476, 57130, 10079, 23250, 488, 10106	2029	16	6215	2.10587	1	0.999795	22.7726
UP_SEQ_FEATURE	active site:Proton acceptor	101	4.83254	0.0140043	1198, 79705, 4047, 9344, 26750, 7296, 7297, 158, 156, 10298, 7167, 8737, 23070, 10825, 4217, 166614, 415116, 5170, 25, 27, 207, 471, 5214, 440275, 1459, 22853, 1455, 219, 25778, 9578, 28996, 23012, 5563, 9020, 7046, 8445, 1267, 10114, 5805, 83732, 9891, 1445, 23387, 226, 5566, 65125, 7915, 6389, 3939, 27102, 1120, 150094, 10188, 5128, 5891, 2580, 1147, 23235, 5894, 2050, 5578, 984, 84033, 10587, …	2029	255	6215	1.21322	1	0.999606	23.5407
UP_SEQ_FEATURE	repeat:Spectrin 4	10	0.478469	0.0149391	5339, 7402, 6712, 23224, 6711, 81, 7204, 87, 6709, 667	2029	14	6215	2.18792	1	0.999463	24.9085
UP_SEQ_FEATURE	domain:Actin-binding	10	0.478469	0.0149391	5339, 7402, 6712, 23224, 6711, 2316, 2317, 81, 87, 667	2029	14	6215	2.18792	1	0.999463	24.9085
UP_SEQ_FEATURE	repeat:Spectrin 3	10	0.478469	0.0149391	5339, 7402, 6712, 23224, 6711, 81, 7204, 87, 6709, 667	2029	14	6215	2.18792	1	0.999463	24.9085
UP_SEQ_FEATURE	metal ion-binding site:Magnesium; via carbonyl oxygen	9	0.430622	0.0162866	22978, 3607, 58478, 58190, 64943, 5214, 5213, 5211, 10106	2029	12	6215	2.29731	1	0.999429	26.8395
UP_SEQ_FEATURE	cross-link:Glycyl lysine isopeptide (Lys-Gly) (interchain with G-Cter in SUMO)	23	1.10048	0.0167533	23020, 5905, 7227, 9935, 2908, 3091, 5371, 6256, 7157, 3297, 10210, 7020, 5903, 11315, 57680, 28996, 3178, 3183, 875, 4152, 6613, 3068, 103	2029	45	6215	1.56558	1	0.999127	27.4973
UP_SEQ_FEATURE	domain:RRM 3	15	0.717703	0.0202706	6173, 3187, 23013, 9991, 9584, 7073, 10236, 54502, 3191, 8761, 80004, 29890, 4691, 26986, 125950	2029	26	6215	1.76716	1	0.999622	32.2773
UP_SEQ_FEATURE	mutagenesis site	326	15.5981	0.0215628	79705, 10892, 29127, 23654, 5371, 10616, 9857, 8737, 22900, 6611, 2010, 6613, 11091, 4217, 8409, 55851, 3091, 55856, 25, 207, 3297, 409, 26001, 23264, 163, 84681, 1981, 8726, 10477, 10625, 7076, 56928, 4791, 6778, 402, 7204, 80727, 8243, 8242, 7227, 9987, 55729, 22794, 7329, 8106, 22919, 25778, 3949, 387893, 81565, 23012, 7046, 6477, 4092, 90933, 9891, 1445, 51586, 3837, 23387, 3735, 324, 7316, 8…	2029	913	6215	1.09372	1	0.999586	33.9573
UP_SEQ_FEATURE	compositionally biased region:Poly-Gln	37	1.77033	0.0254445	6595, 7290, 23559, 57634, 9987, 9828, 10291, 159195, 23613, 84033, 90480, 6942, 1822, 1387, 4924, 57466, 5428, 9612, 2734, 9611, 63977, 51586, 4841, 64599, 10849, 6311, 79874, 9757, 7916, 10743, 463, 54014, 58525, 6601, 55690, 7204, 4609	2029	83	6215	1.36547	1	0.999815	38.7693
UP_SEQ_FEATURE	domain:Post-SET	10	0.478469	0.026662	6839, 55870, 23067, 29072, 7468, 9739, 9757, 64324, 4297, 8085	2029	15	6215	2.04206	1	0.999786	40.2088
UP_SEQ_FEATURE	compositionally biased region:Pro-rich	162	7.7512	0.0275592	4302, 4798, 29123, 4041, 22874, 80742, 90850, 22872, 22870, 155435, 5371, 55740, 221937, 125950, 124245, 23469, 10297, 22904, 64319, 90990, 57178, 653319, 166614, 9919, 23067, 9871, 7408, 25, 9739, 54620, 339344, 27, 22985, 57666, 8729, 56928, 6601, 64324, 374655, 5253, 57553, 79567, 51593, 26993, 1785, 23199, 10523, 23013, 6944, 51517, 401115, 5829, 23524, 9231, 286262, 26058, 22862, 51586, 5587…	2029	436	6215	1.13812	1	0.999732	41.249
UP_SEQ_FEATURE	repeat:4	23	1.10048	0.0294703	29978, 23636, 25930, 8570, 3550, 8661, 1028, 1786, 55740, 8085, 5621, 6238, 3482, 10297, 7936, 4288, 89887, 59269, 4134, 5430, 4691, 29924, 7917	2029	47	6215	1.49896	1	0.999755	43.4081
UP_SEQ_FEATURE	domain:Fibronectin type-III 1	15	0.717703	0.0297062	5796, 5795, 22862, 2050, 6091, 1294, 1969, 5792, 3371, 64778, 3460, 3897, 84033, 5802, 3454	2029	27	6215	1.70171	1	0.999644	43.6692
UP_SEQ_FEATURE	domain:Fibronectin type-III 2	15	0.717703	0.0297062	5796, 5795, 22862, 2050, 6091, 1294, 1969, 5792, 3371, 64778, 3460, 3897, 84033, 5802, 3454	2029	27	6215	1.70171	1	0.999644	43.6692
UP_SEQ_FEATURE	compositionally biased region:Gln-rich	39	1.86603	0.0346265	4798, 6721, 4302, 7023, 56252, 54439, 23054, 26122, 6793, 11100, 10523, 9696, 90990, 85302, 4800, 25792, 54971, 89797, 2800, 26058, 84726, 64599, 23387, 22864, 55793, 91748, 57215, 25957, 2802, 55578, 8085, 10743, 22911, 57680, 51317, 29072, 6449, 7090, 55636	2029	90	6215	1.32734	1	0.999852	48.8641
UP_SEQ_FEATURE	compositionally biased region:Asp/Glu-rich (acidic)	28	1.33971	0.0373709	22978, 9601, 3148, 3149, 10425, 2975, 5989, 6944, 27336, 1460, 26155, 10236, 4673, 324, 9757, 7508, 79191, 351, 7337, 997, 54926, 7913, 1059, 3183, 2547, 728689, 4691, 58496	2029	61	6215	1.40601	1	0.999885	51.561
UP_SEQ_FEATURE	domain:Fibronectin type-III 7	7	0.334928	0.0381522	5802, 5795, 22862, 5792, 1294, 3371, 64778	2029	9	6215	2.3824	1	0.999856	52.3038
UP_SEQ_FEATURE	DNA-binding region:A.T hook 2	7	0.334928	0.0381522	11176, 55870, 10847, 57479, 3159, 9757, 4297	2029	9	6215	2.3824	1	0.999856	52.3038
UP_SEQ_FEATURE	domain:Fibronectin type-III 8	7	0.334928	0.0381522	5802, 5795, 22862, 5792, 1294, 3371, 64778	2029	9	6215	2.3824	1	0.999856	52.3038
UP_SEQ_FEATURE	DNA-binding region:A.T hook 1	7	0.334928	0.0381522	11176, 55870, 10847, 57479, 3159, 9757, 4297	2029	9	6215	2.3824	1	0.999856	52.3038
UP_SEQ_FEATURE	DNA-binding region:A.T hook 3	6	0.287081	0.0412574	11176, 55870, 10847, 3159, 9757, 4297	2029	7	6215	2.6255	1	0.999895	55.1506
UP_SEQ_FEATURE	repeat:Spectrin 2	10	0.478469	0.043602	5339, 7402, 6712, 23224, 6711, 81, 7204, 87, 6709, 667	2029	16	6215	1.91443	1	0.999908	57.1926
UP_SEQ_FEATURE	domain:IQ	10	0.478469	0.043602	84033, 399687, 4627, 89910, 55827, 9922, 4628, 22994, 9690, 4643	2029	16	6215	1.91443	1	0.999908	57.1926
UP_SEQ_FEATURE	repeat:Spectrin 1	10	0.478469	0.043602	5339, 7402, 6712, 23224, 6711, 81, 7204, 87, 6709, 667	2029	16	6215	1.91443	1	0.999908	57.1926
UP_SEQ_FEATURE	compositionally biased region:Asp/Glu-rich (highly acidic)	10	0.478469	0.043602	5905, 1983, 7913, 10360, 6418, 23401, 10541, 334, 8664, 2794	2029	16	6215	1.91443	1	0.999908	57.1926
UP_SEQ_FEATURE	domain:KH 1	10	0.478469	0.043602	80114, 9513, 10644, 8570, 3069, 8939, 5094, 3190, 84206, 8087	2029	16	6215	1.91443	1	0.999908	57.1926
UP_SEQ_FEATURE	domain:KH 2	10	0.478469	0.043602	80114, 9513, 10644, 8570, 3069, 8939, 5094, 3190, 84206, 8087	2029	16	6215	1.91443	1	0.999908	57.1926
UP_SEQ_FEATURE	repeat:15	10	0.478469	0.043602	23636, 6238, 3482, 7936, 4288, 4134, 5430, 3550, 8661, 8085	2029	16	6215	1.91443	1	0.999908	57.1926
UP_SEQ_FEATURE	domain:Protein kinase	74	3.54067	0.0453593	5128, 5891, 2580, 1198, 79705, 23235, 1147, 2050, 5894, 5578, 9344, 340371, 156, 984, 10298, 50488, 8737, 5585, 4217, 5601, 29941, 166614, 6732, 415116, 5605, 56997, 5606, 30849, 26524, 5604, 5170, 25, 27, 207, 7443, 2261, 11183, 9113, 7204, 1459, 22853, 1455, 1956, 9261, 9263, 25778, 2931, 9578, 6793, 3984, 83983, 28996, 23012, 84197, 28951, 5563, 9020, 7046, 3654, 8445, 10114, 9475, 83732, 9891…	2029	189	6215	1.1993	1	0.999908	58.665
UP_SEQ_FEATURE	active site:Glycyl thioester intermediate	20	0.956938	0.0461184	64750, 11060, 7317, 7326, 7329, 7328, 8924, 7337, 7319, 10075, 997, 54926, 10477, 27338, 7322, 89910, 63893, 57448, 9690, 25831	2029	41	6215	1.49419	1	0.999887	59.286
UP_SEQ_FEATURE	domain:Fibronectin type-III 3	12	0.574163	0.0478456	5802, 84033, 5796, 5795, 22862, 6091, 5792, 1294, 3454, 3371, 64778, 3897	2029	21	6215	1.75033	1	0.999887	60.6665
UP_SEQ_FEATURE	repeat:3	27	1.29187	0.0529079	29978, 23636, 8030, 8570, 1028, 10397, 1786, 310, 55740, 6238, 3482, 10297, 59269, 4134, 25930, 3550, 8661, 8085, 5621, 7936, 4288, 89887, 5430, 9188, 4691, 29924, 7917	2029	60	6215	1.37839	1	0.999939	64.4613
UP_SEQ_FEATURE	repeat:ARM 1	8	0.382775	0.059488	10297, 93436, 324, 8502, 3728, 79798, 51566, 1499	2029	12	6215	2.04206	1	0.999975	68.8774
UP_SEQ_FEATURE	domain:SANT	8	0.382775	0.059488	6599, 55929, 57585, 9219, 114803, 9112, 91748, 6601	2029	12	6215	2.04206	1	0.999975	68.8774
UP_SEQ_FEATURE	domain:Fibronectin type-III 4	10	0.478469	0.0664475	5802, 84033, 5796, 5795, 22862, 5792, 1294, 3371, 64778, 3897	2029	17	6215	1.80181	1	0.99999	72.9799
UP_SEQ_FEATURE	repeat:14	10	0.478469	0.0664475	23636, 6238, 3482, 7936, 4288, 4134, 5430, 3550, 8661, 8085	2029	17	6215	1.80181	1	0.99999	72.9799
UP_SEQ_FEATURE	domain:Fibronectin type-III 6	7	0.334928	0.0694337	5802, 5795, 22862, 5792, 1294, 3371, 64778	2029	10	6215	2.14416	1	0.999991	74.5782
UP_SEQ_FEATURE	site:Not acetylated	7	0.334928	0.0694337	9123, 6726, 51727, 2597, 6217, 10146, 5634	2029	10	6215	2.14416	1	0.999991	74.5782
UP_SEQ_FEATURE	domain:Chromo 1	7	0.334928	0.0694337	23468, 57680, 1108, 10951, 1106, 1107, 55636	2029	10	6215	2.14416	1	0.999991	74.5782
UP_SEQ_FEATURE	region of interest:Linker	7	0.334928	0.0694337	824, 5311, 10298, 790, 6434, 10606, 29896	2029	10	6215	2.14416	1	0.999991	74.5782
UP_SEQ_FEATURE	compositionally biased region:Poly-Gly	51	2.44019	0.0718303	29998, 64778, 55435, 8776, 5887, 8500, 81, 91283, 11325, 2619, 9612, 223082, 64784, 23367, 7408, 27, 4297, 7307, 26119, 7248, 7204, 4609, 23060, 3609, 8030, 124808, 7869, 22794, 25777, 55257, 25778, 10521, 22859, 25902, 51341, 116224, 4092, 2734, 26058, 64599, 22864, 91748, 9757, 80851, 27153, 10743, 7916, 463, 22913, 3066, 5818	2029	128	6215	1.22045	1	0.999991	75.7958
UP_SEQ_FEATURE	repeat:WD 2	52	2.48804	0.073515	7290, 55234, 55135, 22872, 197335, 64397, 10399, 1314, 8924, 22937, 27339, 54663, 93594, 6396, 55023, 55717, 51133, 11091, 29888, 64743, 30849, 5928, 56995, 79228, 23160, 23218, 57521, 54461, 26259, 8726, 23603, 5931, 9948, 51594, 14, 26100, 2976, 5822, 348995, 9128, 10113, 22898, 10681, 22911, 10552, 54014, 10607, 55827, 80344, 54806, 7090, 65065	2029	131	6215	1.21588	1	0.999991	76.6183
UP_SEQ_FEATURE	repeat:WD 1	52	2.48804	0.073515	7290, 55234, 55135, 22872, 197335, 64397, 10399, 1314, 8924, 22937, 27339, 54663, 93594, 6396, 55023, 55717, 51133, 11091, 29888, 64743, 30849, 5928, 56995, 79228, 23160, 23218, 57521, 54461, 26259, 8726, 23603, 5931, 9948, 51594, 14, 26100, 2976, 5822, 348995, 9128, 10113, 22898, 10681, 22911, 10552, 54014, 10607, 55827, 80344, 54806, 7090, 65065	2029	131	6215	1.21588	1	0.999991	76.6183
UP_SEQ_FEATURE	splice variant	957	45.7895	0.0739842	55233, 80742, 340371, 5371, 949, 23650, 90231, 334, 221937, 7355, 22904, 414919, 6867, 25792, 8737, 22900, 146540, 8021, 84289, 166614, 84083, 6091, 8733, 50618, 3297, 7337, 8726, 7342, 738, 7343, 8724, 84895, 84893, 8209, 80727, 84294, 8242, 23637, 8761, 25778, 310, 57222, 8241, 2975, 84885, 2976, 7335, 8239, 149951, 8445, 6477, 84883, 196483, 221927, 324, 22907, 79836, 25769, 8754, 10079, 10743…	2029	2848	6215	1.02927	1	0.999988	76.8427
UP_SEQ_FEATURE	repeat:1	30	1.43541	0.075289	23636, 29978, 8030, 6598, 8570, 1028, 10397, 1786, 310, 55740, 6238, 3482, 10297, 59269, 4134, 25930, 3550, 8661, 7408, 8085, 5903, 5621, 4288, 7936, 89887, 5430, 9188, 4691, 29924, 7917	2029	70	6215	1.31275	1	0.999986	77.4558
UP_SEQ_FEATURE	repeat:WD 3	50	2.39234	0.0795086	7290, 55234, 55135, 22872, 197335, 64397, 10399, 1314, 8924, 22937, 27339, 54663, 93594, 6396, 55023, 55717, 51133, 11091, 29888, 64743, 30849, 5928, 56995, 79228, 23160, 23218, 57521, 54461, 26259, 8726, 23603, 5931, 9948, 14, 26100, 2976, 5822, 348995, 9128, 10113, 22898, 10681, 22911, 10552, 54014, 10607, 55827, 80344, 54806, 7090	2029	126	6215	1.21551	1	0.99999	79.3352
UP_SEQ_FEATURE	repeat:11	11	0.526316	0.0806005	23636, 6238, 29978, 3482, 7936, 4288, 4134, 5430, 3550, 8661, 8085	2029	20	6215	1.6847	1	0.999988	79.7968
UP_SEQ_FEATURE	repeat:12	11	0.526316	0.0806005	23636, 6238, 29978, 3482, 7936, 4288, 4134, 5430, 3550, 8661, 8085	2029	20	6215	1.6847	1	0.999988	79.7968
UP_SEQ_FEATURE	domain:KH 3	6	0.287081	0.0808023	10644, 8570, 3069, 8939, 5094, 3190	2029	8	6215	2.29731	1	0.999985	79.881
UP_SEQ_FEATURE	repeat:5	19	0.909091	0.0862766	29978, 23636, 25930, 8030, 3550, 8661, 1028, 1786, 55740, 5621, 8085, 6238, 3482, 10297, 4288, 59269, 4134, 5430, 29924	2029	41	6215	1.41948	1	0.999991	82.043
UP_SEQ_FEATURE	repeat:WD 6	38	1.81818	0.0866154	7290, 9948, 55234, 55135, 22872, 197335, 64397, 1314, 10399, 8924, 14, 22937, 54663, 27339, 5822, 348995, 9128, 6396, 55023, 55717, 11091, 29888, 30849, 5928, 10681, 79228, 23160, 57521, 22911, 10552, 54014, 8726, 10607, 55827, 80344, 54806, 7090, 5931	2029	93	6215	1.25158	1	0.999988	82.1693
UP_SEQ_FEATURE	domain:RRM 2	26	1.24402	0.0883746	6173, 26528, 9991, 4841, 55147, 9987, 10236, 8761, 8241, 125950, 3187, 23013, 9584, 7073, 3178, 5937, 10644, 27336, 54502, 3191, 5936, 3181, 80004, 29890, 4691, 26986	2029	60	6215	1.32734	1	0.999988	82.8116
UP_SEQ_FEATURE	domain:RRM 1	26	1.24402	0.0883746	6173, 26528, 9991, 4841, 55147, 9987, 10236, 8761, 8241, 125950, 3187, 23013, 9584, 7073, 3178, 5937, 10644, 27336, 54502, 3191, 5936, 3181, 80004, 29890, 4691, 26986	2029	60	6215	1.32734	1	0.999988	82.8116
UP_SEQ_FEATURE	zinc finger region:PHD-type	17	0.813397	0.0924828	5253, 84289, 55870, 51230, 22992, 54620, 10743, 23613, 23469, 11176, 51317, 57661, 9767, 9031, 23133, 23338, 7862	2029	36	6215	1.44646	1	0.99999	84.2274
UP_SEQ_FEATURE	repeat:6	17	0.813397	0.0924828	29978, 23636, 25930, 3550, 8661, 1028, 55740, 8085, 6238, 3482, 4288, 7936, 59269, 4134, 5430, 4691, 29924	2029	36	6215	1.44646	1	0.99999	84.2274
UP_SEQ_FEATURE	repeat:WD 7	27	1.29187	0.0925606	7290, 9948, 22872, 197335, 10399, 14, 22937, 27339, 5822, 9128, 55023, 55717, 11091, 29888, 30849, 10681, 79228, 57521, 22911, 8726, 54014, 10607, 55827, 80344, 54806, 7090, 5931	2029	63	6215	1.31275	1	0.999988	84.2531
UP_SEQ_FEATURE	domain:Laminin EGF-like 10	5	0.239234	0.0932397	3913, 3915, 3339, 3911, 3912	2029	6	6215	2.55257	1	0.999985	84.4759
UP_SEQ_FEATURE	domain:Laminin EGF-like 8	5	0.239234	0.0932397	3913, 3915, 3339, 3911, 3912	2029	6	6215	2.55257	1	0.999985	84.4759
UP_SEQ_FEATURE	compositionally biased region:Tyr-rich	5	0.239234	0.0932397	23013, 9987, 11100, 8241, 221092	2029	6	6215	2.55257	1	0.999985	84.4759
UP_SEQ_FEATURE	region of interest:Triple-helical region	5	0.239234	0.0932397	1282, 1284, 1294, 1289, 85301	2029	6	6215	2.55257	1	0.999985	84.4759
UP_SEQ_FEATURE	domain:Fibronectin type-III 5	8	0.382775	0.0934682	5802, 5795, 22862, 5792, 1294, 3371, 64778, 3897	2029	13	6215	1.88498	1	0.999982	84.5502
UP_SEQ_FEATURE	topological domain:Mitochondrial intermembrane	10	0.478469	0.0955431	3954, 9804, 1374, 1120, 131118, 1349, 92609, 1345, 9927, 114789	2029	18	6215	1.70171	1	0.999982	85.2095
UP_SEQ_FEATURE	domain:CH	10	0.478469	0.0955431	57553, 7410, 8407, 8826, 8874, 22919, 85377, 79778, 89797, 9645	2029	18	6215	1.70171	1	0.999982	85.2095
UP_SEQ_FEATURE	binding site:ATP	87	4.16268	0.0976752	5128, 5891, 1198, 79705, 23235, 1147, 5164, 5894, 2050, 5578, 9344, 26750, 4598, 7297, 5634, 156, 984, 10298, 84033, 50488, 8737, 5585, 10131, 4217, 29941, 5601, 166614, 6732, 415116, 5605, 5606, 30849, 26524, 5604, 5170, 7407, 25, 27, 207, 7443, 2261, 11183, 9113, 4830, 4832, 8986, 7204, 440275, 1459, 22853, 1455, 1956, 9261, 9263, 2931, 25778, 9578, 6793, 3984, 83983, 23012, 28996, 5563, 9020, …	2029	234	6215	1.13884	1	0.999982	85.8591

## Sheet: M3_related_functions
Category	Term	Count	%	PValue	Genes	List Total	Pop Hits	Pop Total	Fold Enrichment	Bonferroni	Benjamini	FDR
BBID	48.mice_minus_JAKs_and_STATs	4	0.32077	0.0908942	6774, 6778, 7297, 3716	31	5	124	3.2	0.988653	0.988653	59.5507
[truncated: 386 more rows]

## Sheet: M4_related_functions
Category	Term	Count	%	PValue	Genes	List Total	Pop Hits	Pop Total	Fold Enrichment	Bonferroni	Benjamini	FDR
[truncated: 106 more rows]

## Sheet: M5_related_functions
Category	Term	Count	%	PValue	Genes	List Total	Pop Hits	Pop Total	Fold Enrichment	Bonferroni	Benjamini	FDR
[truncated: 91 more rows]
